# Supplementary material for: Beryllium compounds for the carbon–halogen bond activation of phenyl halides: the role of non-innocent ligands
Source: Royal Society of Chemistry journal article supplement (doi:10.1039/d3dt02251j), 2023-01-01
Supplement: d3dt02251j1.pdf [file d3dt02251j1.pdf]

## SUPPORTING INFORMATION

for

### Beryllium Compounds for the Carbon–Halogen Bond Activation of Phenyl Halides: The Role of Non-Innocent Ligands

Daniel E. Trujillo-González,<sup>1,2</sup> Gerardo González García,<sup>1</sup> J. Oscar C. Jiménez-Halla,<sup>1\*</sup> and Miquel Solà<sup>2\*</sup>

<sup>1</sup>Departamento de Química, Campus Guanajuato, Universidad de Guanajuato. Noria Alta S/N, CP 36050. Guanajuato, Gto, México.

<sup>2</sup>Institut de Química Computacional i Catàlisi and Departament de Química, Universitat de Girona, C/ Maria Aurèlia Capmany, 69, 17003 Girona, Catalonia, Spain.

\*E-mail: [jjimenez@ugto.mx](mailto:jjimenez@ugto.mx), [miquel.sola@udg.edu](mailto:miquel.sola@udg.edu).

#### Contents

**Table S1.** Relative energies (in kcal/mol) calculated at the  $\omega$ B97X-D/def2-SVPP level.

**Figure S1.** Optimized geometries calculated at the  $\omega$ B97X-D/def2-SVPP level.

**Table S2.** (a) NICS (in ppm) calculated at the B3PW91/6-311+G\*\*// $\omega$ B97X-D/def2-SVPP level.  $n = 5$  for the five-membered rings and 6 for the six-membered ring (benzene). Values for intermediates and products are given only for X = Cl.

**Figure S2.** Energy Decomposition Analysis (EDA) calculated at the BLYP-D3(BJ)/TZ2P// $\omega$ B97X-D/def2-SVPP level of theory. All energies are in kcal/mol.

**Figure S3.** Isomerization Stabilization Energies (ISEs) calculated at  $\omega$ B97X-D/def2-TZVP(SMD:toluene)// $\omega$ B97X-D/def2-SVPP level of theory. ISE based on Gibbs energies.

**Figure S4.** IBO analysis along the intrinsic reaction coordinate using the PBE/def2-SVPP// $\omega$ B97X-D/def2-SVPP method. (a) and (b) for the **NNBe**. EOS black for ligand and red for Be and F.

**Table S3.** Ph–X bonding energies calculated at  $\omega$ B97X-D/def2-SVPP level.

**Figure S5.** Reactions mechanism for X–Ph bond activation calculated at  $\omega$ B97X-D/def2-TZVP(SMD:toluene)// $\omega$ B97X-D/def2-SVPP level of theory. **a5**, **b5**, and **c5** point out the

product. TS were not calculated due to the high cost to get intermediates **a3**, **b3**, **c3**, and products.

**Figure S6.** HOMO, LUMO and  $GAP_{HL}$  calculated at  $\omega$ B97X-D/ def2-SVPP level of theory.  $(CAAC)_2Be(113^\circ)$  refers to the distorted  $CAAC_2Be$  complex with a  $\angle CBeC$  angle of  $113^\circ$ . Isosurface values of 0.03 a.u.

**Figure S7.** Reaction mechanism for the Ph–F bond activation using **NNBe**. In red, the Gibbs energy profile calculated at  $\omega$ B97X-D/def2-TZVP(SMD:toluene)// $\omega$ B97X-D/def2-SVPP level of theory and in blue with the  $\omega$ B97X-D/def2-TZVPP(SMD:toluene)// $\omega$ B97X-D/def2-TZVPP method.

**Table S4.** Isomerization stabilization energies (ISEs, kcal/mol) and Gibbs energy barriers for the oxidative addition for different five-membered rings and halogens.

**Table S5.** Cartesian coordinates (xyz format) of the optimized geometries for all the compounds involved in the reaction mechanisms calculated at the  $\omega$ B97X-D/def2-SVPP level.

**Table S1.** Relative energies (in kcal/mol) calculated at the  $\omega$ B97X-D/def2-SVPP level.

| Multiplicity    | NtBuNtBuBe | NNBe | NPBe | NSBe | NOBe | (CAAC) <sub>2</sub> Be |
|-----------------|------------|------|------|------|------|------------------------|
| S <sub>BS</sub> | 0.0        | 0.0  | 0.0  | 0.0  | 0.0  | 0.0                    |
| S               | 0.0        | 0.0  | 0.0  | 0.0  | 0.0  | 8.7                    |
| T               | 19.4       | 14.9 | 27.5 | 28.8 | 19.8 | 5.5                    |

S<sub>BS</sub> = Singlet Broken Symmetry; S = Singlet; T = Triplet

Figure S1. Optimized geometries calculated at the  $\omega$ B97X-D/def2-SVPP level.

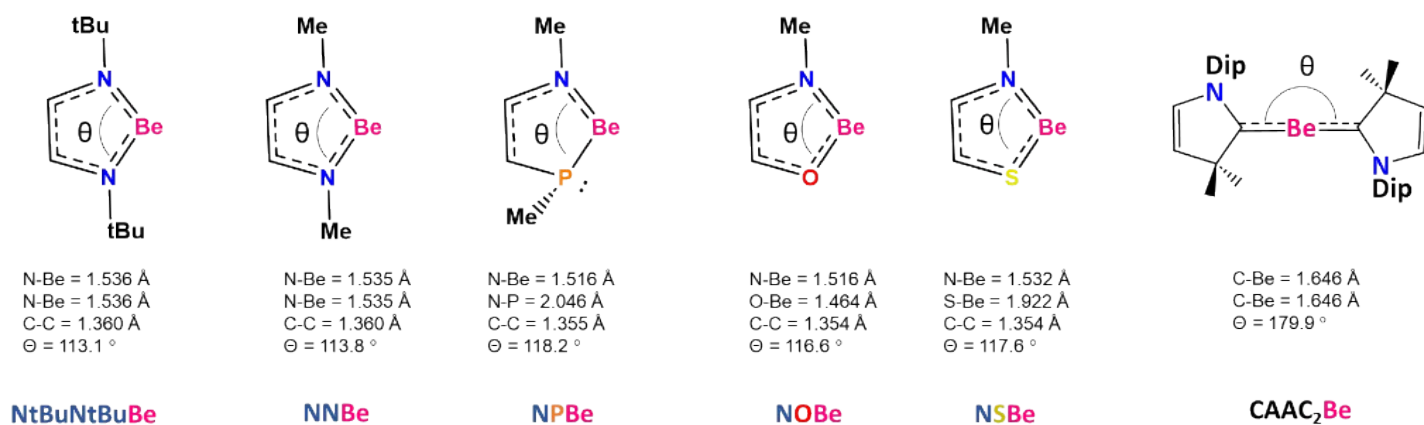

**Table S2.** (a) NICS (in ppm) calculated at the B3PW91/6-311+G\*\*// $\omega$ B97X-D/def2-SVPP level.  $n = 5$  for the five-membered rings and 6 for the six-membered ring (benzene). Values for intermediates and products are given only for X = Cl.

| Compound          | NICS(0) | NICS(1) <sub>zz</sub> | NICS(-1) <sub>zz</sub> | MCI     | (MCI) <sup>1/n</sup> |
|-------------------|---------|-----------------------|------------------------|---------|----------------------|
| <b>NtBuNtBuBe</b> | -9.2    | -9.6                  | -9.6                   | 0.0322  | 0.5030               |
| <b>NNBe</b>       | -8.7    | -9.9                  | -9.9                   | 0.0330  | 0.5055               |
| <b>NOBe</b>       | -6.3    | -8.2                  | -8.2                   | 0.0322  | 0.5030               |
| <b>NPBe</b>       | -2.9    | 1.4                   | -0.5                   | 0.0242  | 0.4751               |
| <b>NSBe</b>       | -8.0    | -7.6                  | -7.6                   | 0.0318  | 0.5017               |
| <b>Benzene</b>    | -8.3    | -29.4                 | -29.4                  | 0.0415  | 0.5884               |
| <b>1.3a</b>       | 1.4     | -5.3                  | -                      | 0.0180  | 0.4479               |
| <b>2.3a</b>       | 1.7     | -5.6                  | -                      | 0.0178  | 0.4468               |
| <b>4.3c</b>       | 1.4     | -8.2                  | -                      | 0.0187  | 0.4512               |
| <b>5.3c</b>       | -1.1    | -11.3                 | -                      | 0.0213  | 0.4631               |
| <b>1.5a</b>       | -2.6    | 2.4                   | -                      | -0.0091 | -0.3903              |
| <b>2.5a</b>       | -1.6    | -2.3                  | -                      | -0.0128 | -0.4184              |
| <b>3.4a</b>       | -0.2    | 6.2                   | -                      | -0.0152 | -0.4331              |
| <b>3.4b</b>       | -1.4    | 0.6                   | -                      | 0.0166  | 0.4406               |
| <b>4.5a</b>       | -2.0    | 0.3                   | -                      | 0.0159  | 0.4368               |
| <b>4.5b</b>       | -4.9    | -3.1                  | -                      | 0.0214  | 0.4634               |
| <b>5.5a</b>       | -2.4    | -1.6                  | -                      | 0.0166  | 0.4408               |
| <b>5.5b</b>       | -2.9    | 0.0                   | -                      | -0.0125 | -0.4160              |

**Figure S2.** Energy Decomposition Analysis (EDA) calculated at the BLYP-D3(BJ)/TZ2P// $\omega$ B97X-D/def2-SVPP level of theory. All energies are in kcal/mol.

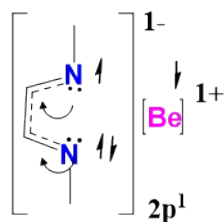

| conf Be          | $\Delta E_{\text{Int}}$ | $\Delta E_{\text{Pauli}}$ | $\Delta V_{\text{elst}}$ | $\Delta E_{\text{orb}}$ | $\Delta E_{\text{dis}}$ |
|------------------|-------------------------|---------------------------|--------------------------|-------------------------|-------------------------|
| Be <sup>1+</sup> | -400.0                  | 674.3                     | -330.5                   | -740.7                  | -3.2                    |

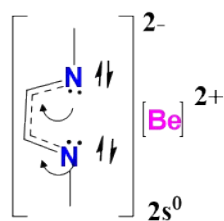

| conf Be          | $\Delta E_{\text{Int}}$ | $\Delta E_{\text{Pauli}}$ | $\Delta V_{\text{elst}}$ | $\Delta E_{\text{orb}}$ | $\Delta E_{\text{dis}}$ |
|------------------|-------------------------|---------------------------|--------------------------|-------------------------|-------------------------|
| Be <sup>2+</sup> | -848.6                  | 97.3                      | -604.9                   | -337.8                  | -3.2                    |

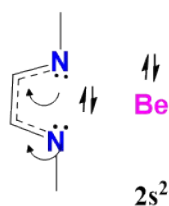

| conf Be            | $\Delta E_{\text{Int}}$ | $\Delta E_{\text{Pauli}}$ | $\Delta V_{\text{elst}}$ | $\Delta E_{\text{orb}}$ | $\Delta E_{\text{dis}}$ |
|--------------------|-------------------------|---------------------------|--------------------------|-------------------------|-------------------------|
| Be <sup>0(s)</sup> | -116.8                  | 516.2                     | -284.5                   | -345.3                  | -3.2                    |

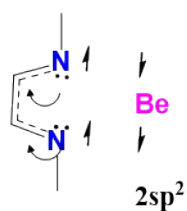

| conf Be            | $\Delta E_{\text{Int}}$ | $\Delta E_{\text{Pauli}}$ | $\Delta V_{\text{elst}}$ | $\Delta E_{\text{orb}}$ | $\Delta E_{\text{dis}}$ |
|--------------------|-------------------------|---------------------------|--------------------------|-------------------------|-------------------------|
| Be <sup>0(t)</sup> | -210.2                  | 858.2                     | -252.0                   | -813.2                  | -3.2                    |

**Figure S3.** Isomerization Stabilization Energies (ISEs) calculated at  $\omega$ B97X-D/def2-TZVP(SMD:toluene)// $\omega$ B97X-D/def2-SVPP level of theory. ISE based on Gibbs energies.

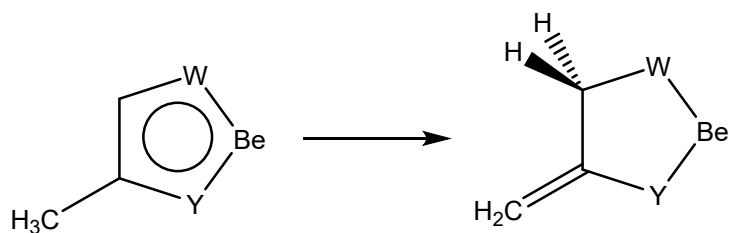

| Ring | ISE<br>(kcal/mol) |
|------|-------------------|
| NNBe | 3.8               |
| NPBe | 8.4               |
| NOBe | 5.7               |
| NSBe | 11.9              |

**Figure S4.** IBO analysis along the intrinsic reaction coordinate using the PBE/def2-SVPP// $\omega$ B97X-D/def2-SVPP method. (a) and (b) for the **NNBe**. EOS black for ligand and red for Be and F.

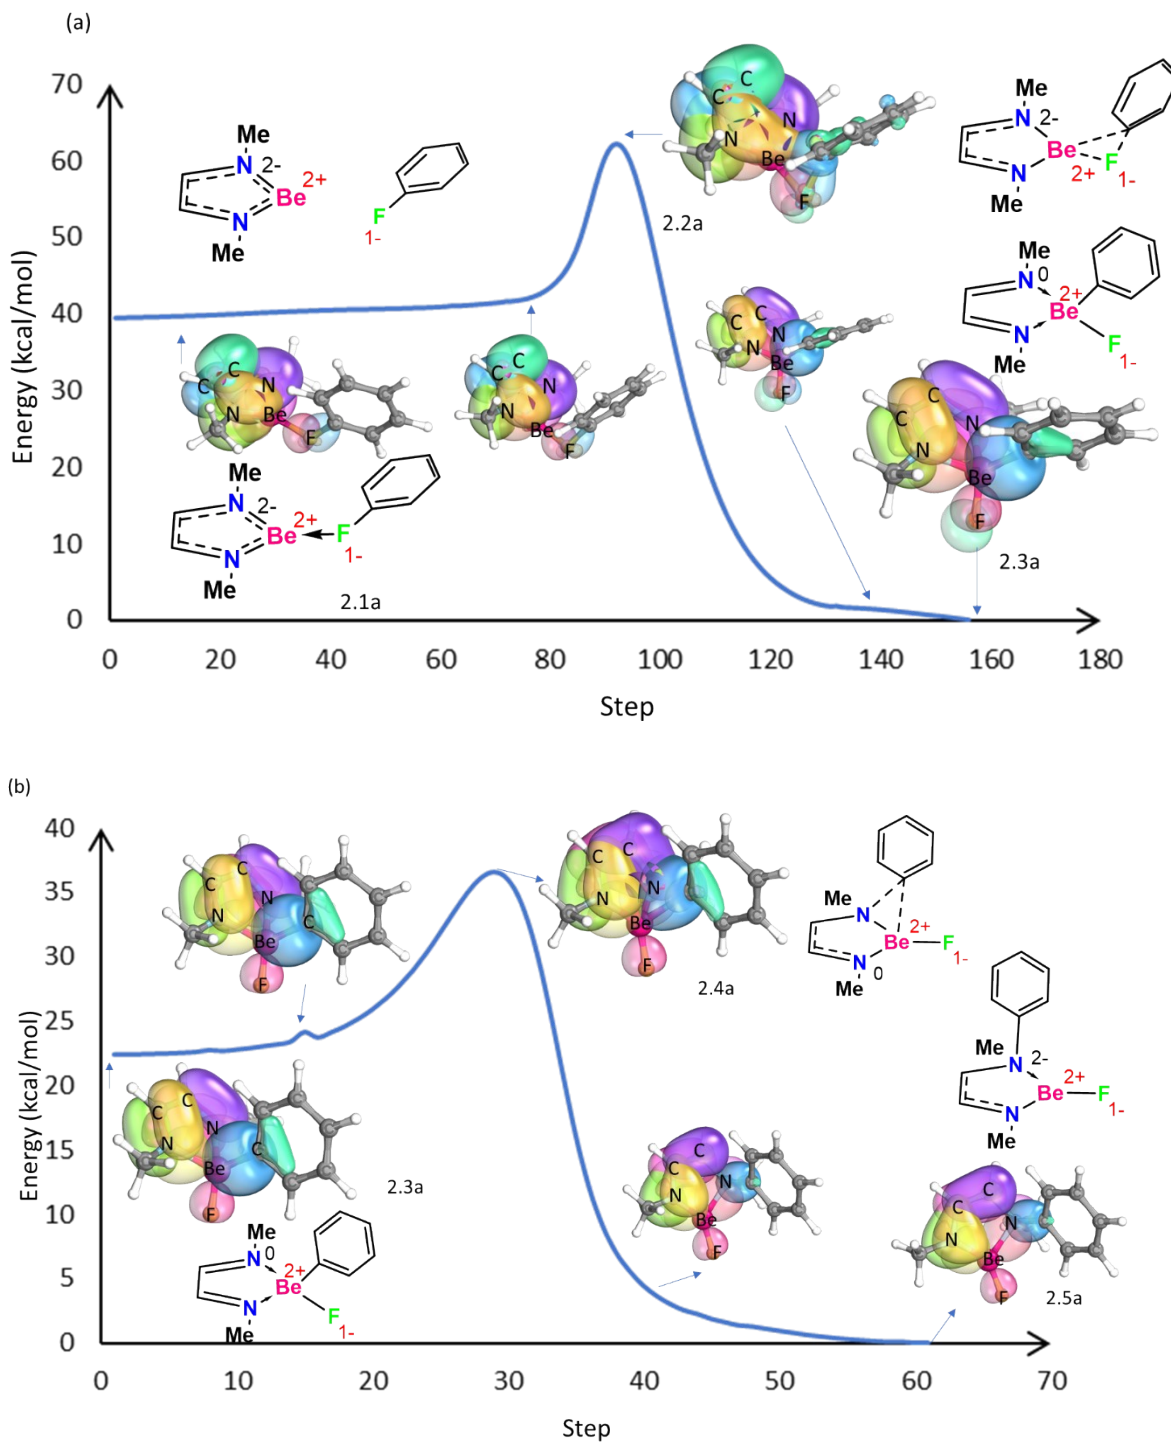



**Table S3.** Ph–X bonding energies calculated at  $\omega$ B97X-D/def2-SVPP level.

| Homolytic dissociation |               |
|------------------------|---------------|
| Molecule               | BE (kcal/mol) |
| <b>PhF</b>             | 131.7         |
| <b>PhCl</b>            | 97.4          |
| <b>PhBr</b>            | 84.8          |
| <b>PhI</b>             | 70.9          |

  

| Heterolytic dissociation (Ph <sup>+</sup> + X <sup>-</sup> ) |               |
|--------------------------------------------------------------|---------------|
| Molecule                                                     | BE (kcal/mol) |
| <b>PhF</b>                                                   | 314.2         |
| <b>PhCl</b>                                                  | 254.8         |
| <b>PhBr</b>                                                  | 235.2         |
| <b>PhI</b>                                                   | 219.0         |

**Figure S5.** Reactions mechanism for Ph–X bond activation calculated at  $\omega$ B97X-D/def2-TZVP(SMD:toluene)// $\omega$ B97X-D/def2-SVPP level of theory. **a5**, **b5**, and **c5** point out the product. TS were not calculated due to the high cost to get intermediates **a3**, **b3**, **c3**, and products.

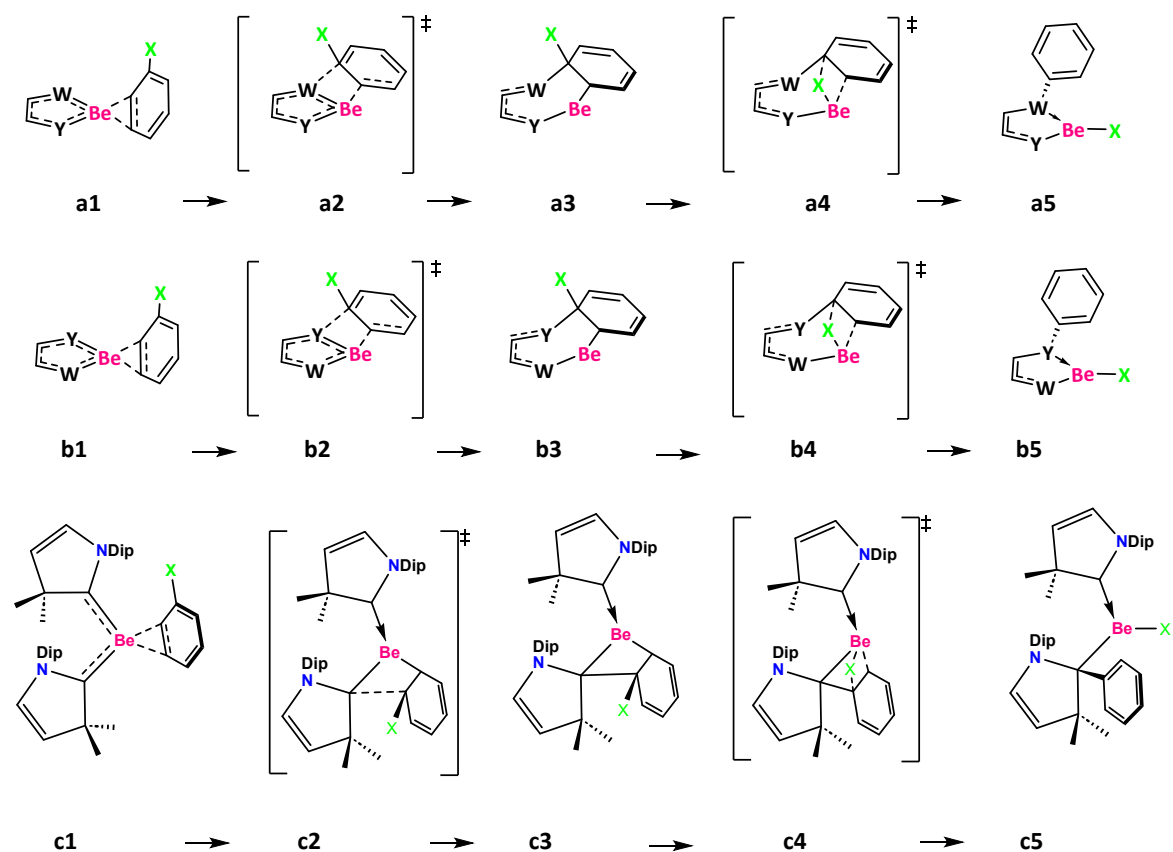

| Reaction        | a1   | a2   | a3   | a4   | Reaction  | a1   | a2   | a3   | a4 |
|-----------------|------|------|------|------|-----------|------|------|------|----|
| NtBuNtBuBe+FPh  | 16.6 | 49.5 | 45.9 | 57.6 | NNBe+FPh  | -1.6 | 30.6 | 27.0 | -  |
| NtBuNtBuBe+ClPh | 18.1 | 54.9 | 52.0 | -    | NNBe+ClPh | -1.7 | 33.4 | 31.5 | -  |
| NtBuNtBuBe+BrPh | 17.1 | 55.3 | 52.3 | -    | NNBe+BrPh | -1.4 | 34.2 | 31.5 | -  |
| NtBuNtBuBe+IPh  | 16.4 | 53.3 | 50.3 | -    | NNBe+IPh  | -2.2 | 33.2 | 31.0 | -  |
| Reaction        | a1   | a2   | a3   | a4   | Reaction  | a1   | a2   | a3   | a4 |
| NPBe+FPh        | 0.1  | -    | 32.5 | -    | NOBe+FPh  | -3.9 | -    | 25.7 | -  |
| NPBe+ClPh       | -1.7 | -    | 28.8 | -    | NOBe+ClPh | -4.2 | -    | 30.3 | -  |
| NPBe+BrPh       | -0.7 | -    | 27.3 | -    | NOBe+BrPh | -3.8 | -    | 24.4 | -  |
| NPBe+IPh        | -1.8 | -    | 25.5 | -    | NOBe+IPh  | -3.9 | -    | 23.4 | -  |
| Reaction        | a1   | a2   | a3   | a4   | Reaction  | b1   | b2   | b3   | b4 |
| NSBe+FPh        | -2.8 | -    | 32.0 | -    | NPBe+FPh  | 0.1  | -    | 12.7 | -  |
| NSBe+ClPh       | -2.9 | -    | 36.9 | -    | NPBe+ClPh | -1.7 | -    | 16.1 | -  |

|                           |      |    |      |    |           |      |    |      |    |
|---------------------------|------|----|------|----|-----------|------|----|------|----|
| NSBe+BrPh                 | -2.6 | -  | 37.0 | -  | NPBe+BrPh | -0.7 | -  | 13.7 | -  |
| NSBe+IPh                  | -3.2 | -  | 36.9 | -  | NPBe+IPh  | -1.8 | -  | 12.3 | -  |
| Reaction                  | b1   | b2 | b3   | b4 | Reaction  | b1   | b2 | b3   | b4 |
| NOBe+FPh                  | -3.9 | -  | 36.4 | -  | NSBe+FPh  | -2.8 | -  | ---  | -  |
| NOBe+ClPh                 | -4.2 | -  | 40.9 | -  | NSBe+ClPh | -2.9 | -  | 34.7 | -  |
| NOBe+BrPh                 | -3.8 | -  | 41.1 | -  | NSBe+BrPh | -2.6 | -  | 33.3 | -  |
| NOBe+IPh                  | -3.9 | -  | 41.1 | -  | NSBe+IPh  | -3.2 | -  | 32.4 | -  |
| Reaction                  | c1   | c2 | c3   | c4 |           |      |    |      |    |
| CAAC <sub>2</sub> Be+FPh  | 49.4 | -  | 35.0 | -  |           |      |    |      |    |
| CAAC <sub>2</sub> Be+ClPh | 49.7 | -  | 41.0 | -  |           |      |    |      |    |
| CAAC <sub>2</sub> Be+BrPh | 48.7 | -  | 41.2 | -  |           |      |    |      |    |
| CAAC <sub>2</sub> Be+IPh  | 49.4 | -  | ---  | -  |           |      |    |      |    |

**Figure S6.** HOMO, LUMO and  $GAP_{HL}$  calculated at  $\omega$ B97X-D/ def2-SVPP level of theory.  $(CAAC)_2Be(113^\circ)$  refers to the distorted  $CAAC_2Be$  complex with a  $\angle CBeC$  angle of  $113^\circ$ . Isosurface values of 0.03 a.u.

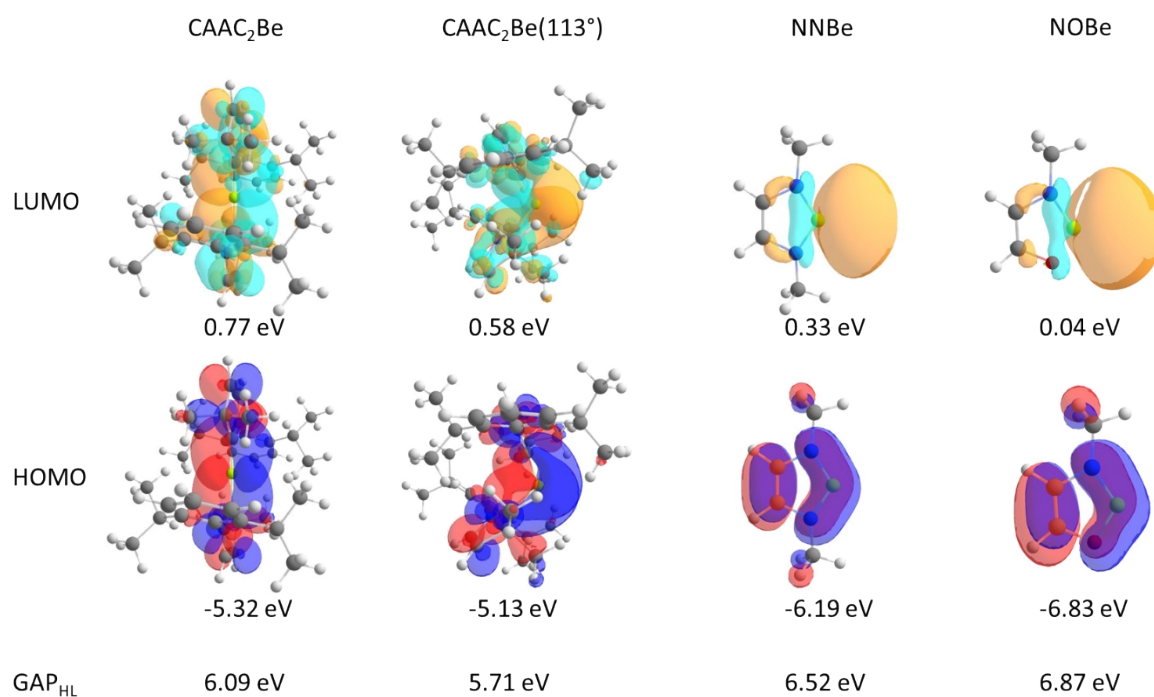

**Figure S7.** Reaction mechanism for the Ph–F bond activation using **NNBe**. In red, the Gibbs energy profile calculated at  $\omega$ B97X-D/def2-TZVP(SMD:toluene)// $\omega$ B97X-D/def2-SVPP level of theory and in blue with the  $\omega$ B97X-D/def2-TZVPP(SMD:toluene)// $\omega$ B97X-D/def2-TZVPP method.

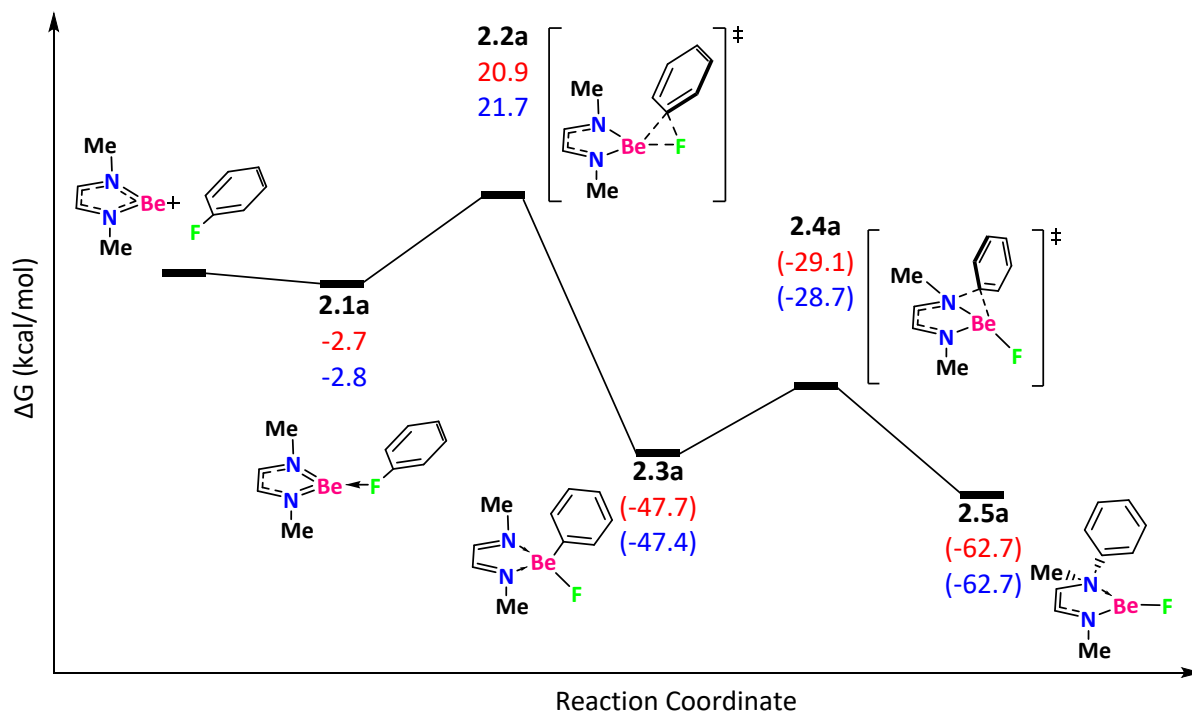

**Table S4.** Isomerization stabilization energies (ISEs, kcal/mol) and Gibbs energy barriers for the oxidative addition for different five-membered rings and halogens.

| Ring | ISE  | Halogen | Step | $\Delta G^\ddagger$ |
|------|------|---------|------|---------------------|
| NNBe | 3.8  | Cl      | 2.2a | 20.6                |
|      |      | Br      |      | 17.2                |
|      |      | I       |      | 15.6                |
| NPBe | 8.4  | -       | -    | -                   |
| NOBe | 5.7  | Cl      | 4.2c | 24.0                |
|      |      | Br      |      | 20.8                |
|      |      | I       |      | 18.5                |
| NSBe | 11.9 | Cl      | 5.2c | 30.6                |
|      |      | Br      |      | 26.6                |
|      |      | I       |      | 25.1                |

**Table S5.** Cartesian coordinates (xyz format) of the optimized geometries for all the compounds involved in the reaction mechanisms calculated at the  $\omega$ B97X-D/def2-SVPP level.

NNBe+FPha1

|    |          |          |          |
|----|----------|----------|----------|
| C  | -2.15874 | 1.65194  | -0.27139 |
| C  | -2.92499 | 0.52110  | -0.20408 |
| H  | -2.54594 | 2.66105  | -0.44650 |
| H  | -4.01285 | 0.49441  | -0.32107 |
| Be | -0.71050 | -0.12993 | 0.11606  |
| C  | -2.88037 | -1.89377 | 0.11652  |
| H  | -3.62393 | -1.91376 | 0.93931  |
| H  | -3.41746 | -2.15031 | -0.81940 |
| H  | -2.15599 | -2.70536 | 0.31011  |
| C  | 0.13112  | 2.51234  | -0.12163 |
| H  | -0.36658 | 3.47721  | -0.33217 |
| H  | 0.66549  | 2.61408  | 0.84640  |
| H  | 0.91249  | 2.36124  | -0.89501 |
| N  | -0.80544 | 1.42970  | -0.09878 |
| N  | -2.19760 | -0.63411 | 0.02694  |
| C  | 1.82806  | -0.63679 | -0.85969 |
| C  | 2.64690  | 0.24153  | -0.18556 |
| C  | 0.81367  | -1.36996 | -0.20621 |
| H  | 3.41487  | 0.78949  | -0.73540 |
| H  | 0.29370  | -2.16081 | -0.75220 |
| C  | 2.47199  | 0.40785  | 1.20454  |
| C  | 0.65520  | -1.19462 | 1.18971  |
| H  | 3.12245  | 1.10067  | 1.74435  |
| H  | -0.03684 | -1.83566 | 1.74145  |
| C  | 1.49216  | -0.29223 | 1.88363  |
| H  | 1.36152  | -0.16036 | 2.95984  |
| F  | 1.97804  | -0.81174 | -2.16403 |

NNBe+IPha1

|    |         |          |          |
|----|---------|----------|----------|
| C  | 2.93159 | -0.52904 | 1.71508  |
| C  | 3.38995 | -1.33943 | 0.71322  |
| H  | 3.29808 | -0.54056 | 2.74689  |
| H  | 4.17531 | -2.09306 | 0.82750  |
| Be | 1.72741 | 0.01100  | -0.20210 |
| C  | 3.14370 | -1.92704 | -1.63781 |
| H  | 4.21440 | -1.80138 | -1.89868 |
| H  | 2.96873 | -3.00971 | -1.47283 |
| H  | 2.55396 | -1.63244 | -2.52456 |
| C  | 1.34065 | 1.25362  | 2.25834  |
| H  | 1.77738 | 1.14201  | 3.26825  |
| H  | 1.48090 | 2.30953  | 1.94551  |

|   |          |          |          |
|---|----------|----------|----------|
| H | 0.24531  | 1.09590  | 2.34662  |
| N | 1.93155  | 0.34160  | 1.32617  |
| N | 2.76232  | -1.13341 | -0.50375 |
| C | -0.96942 | 0.64561  | -0.45688 |
| C | -1.04550 | 1.94654  | -0.00006 |
| C | 0.07963  | 0.23898  | -1.32062 |
| H | -1.85435 | 2.25447  | 0.66642  |
| H | 0.06011  | -0.75012 | -1.78445 |
| C | -0.06738 | 2.88758  | -0.39429 |
| C | 1.05271  | 1.19016  | -1.70796 |
| H | -0.13878 | 3.91480  | -0.02746 |
| H | 1.79714  | 0.92667  | -2.46380 |
| C | 0.96689  | 2.51792  | -1.23003 |
| H | 1.72082  | 3.24681  | -1.53634 |
| I | -2.39628 | -0.77120 | 0.13820  |

#### NNBe+BePha1

|    |          |          |          |
|----|----------|----------|----------|
| C  | 2.68931  | -0.02887 | 1.68546  |
| C  | 3.26182  | -0.83974 | 0.74405  |
| H  | 3.08539  | 0.13735  | 2.69264  |
| H  | 4.18345  | -1.41186 | 0.88858  |
| Be | 1.33719  | 0.06395  | -0.20758 |
| C  | 3.05922  | -1.69932 | -1.52650 |
| H  | 4.05152  | -1.36101 | -1.88940 |
| H  | 3.15893  | -2.76573 | -1.23955 |
| H  | 2.36479  | -1.65722 | -2.38487 |
| C  | 0.80026  | 1.46786  | 2.13390  |
| H  | 1.28309  | 1.55452  | 3.12502  |
| H  | 0.72005  | 2.48963  | 1.70724  |
| H  | -0.23926 | 1.11403  | 2.29561  |
| N  | 1.52662  | 0.58923  | 1.26768  |
| N  | 2.56367  | -0.88857 | -0.45025 |
| C  | -1.43157 | 0.20525  | -0.40117 |
| C  | -1.72168 | 1.51507  | -0.07860 |
| C  | -0.35309 | -0.11674 | -1.26324 |
| H  | -2.55420 | 1.74420  | 0.58994  |
| H  | -0.22373 | -1.14217 | -1.61731 |
| C  | -0.93237 | 2.55718  | -0.61420 |
| C  | 0.42709  | 0.93719  | -1.79435 |
| H  | -1.16860 | 3.59259  | -0.35587 |
| H  | 1.18433  | 0.72176  | -2.55248 |
| C  | 0.12671  | 2.27598  | -1.45410 |
| H  | 0.73531  | 3.08276  | -1.86906 |
| Br | -2.46046 | -1.19721 | 0.31801  |



NNBe+BrPha1

|    |          |          |          |
|----|----------|----------|----------|
| C  | -2.35333 | 1.17802  | -1.13931 |
| C  | -3.05397 | 0.11466  | -0.63994 |
| H  | -2.75593 | 1.92470  | -1.83171 |
| H  | -4.09904 | -0.11126 | -0.87341 |
| Be | -0.90603 | 0.00280  | 0.25450  |
| C  | -2.92905 | -1.84994 | 0.79456  |
| H  | -3.81584 | -1.59885 | 1.41178  |
| H  | -3.25778 | -2.57935 | 0.02645  |
| H  | -2.20997 | -2.37075 | 1.45209  |
| C  | -0.17312 | 2.29884  | -1.13520 |
| H  | -0.68400 | 2.99195  | -1.82913 |
| H  | 0.21019  | 2.89690  | -0.28214 |
| H  | 0.71843  | 1.89453  | -1.65854 |
| N  | -1.04639 | 1.25241  | -0.69698 |
| N  | -2.31825 | -0.68629 | 0.21671  |
| C  | 1.77947  | -0.57446 | -0.09288 |
| C  | 2.42145  | 0.61449  | 0.18694  |
| C  | 0.72403  | -1.05059 | 0.72377  |
| H  | 3.23004  | 0.96062  | -0.45975 |
| H  | 0.32938  | -2.05658 | 0.56479  |
| C  | 2.02000  | 1.37414  | 1.30750  |
| C  | 0.33139  | -0.27815 | 1.84168  |
| H  | 2.53245  | 2.31472  | 1.52491  |
| H  | -0.39758 | -0.68077 | 2.54978  |
| C  | 0.98998  | 0.94173  | 2.11948  |
| H  | 0.68132  | 1.53116  | 2.98598  |
| Cl | 2.24434  | -1.51198 | -1.47275 |

NNBe+BrPha3

|    |          |          |          |
|----|----------|----------|----------|
| C  | -1.50227 | 0.14395  | 1.50690  |
| C  | -2.59893 | -0.18345 | 0.78401  |
| H  | -1.48225 | 0.74516  | 2.41800  |
| H  | -3.59699 | 0.19082  | 1.04549  |
| Be | -0.89997 | -1.21172 | -0.47870 |
| C  | -3.61059 | -1.25773 | -1.14444 |
| H  | -4.41676 | -1.76407 | -0.57768 |
| H  | -4.03640 | -0.33377 | -1.58366 |
| H  | -3.32990 | -1.92082 | -1.97843 |
| C  | 0.28608  | -1.41358 | 2.01454  |
| H  | -0.51727 | -2.05917 | 2.40276  |
| H  | 1.05928  | -2.04386 | 1.55031  |
| H  | 0.73875  | -0.85846 | 2.85480  |
| N  | -0.31049 | -0.50773 | 1.02258  |
| N  | -2.45293 | -0.99196 | -0.32477 |

|    |         |          |          |
|----|---------|----------|----------|
| C  | 0.72959 | 0.15762  | 0.06610  |
| C  | 2.08751 | 0.25967  | 0.68166  |
| C  | 0.63466 | -0.75151 | -1.19059 |
| H  | 2.25192 | 1.05036  | 1.41934  |
| H  | 0.40424 | -0.19789 | -2.11785 |
| C  | 3.06943 | -0.60029 | 0.34894  |
| C  | 1.77186 | -1.65893 | -1.40225 |
| H  | 4.04350 | -0.50322 | 0.84013  |
| H  | 1.68908 | -2.36242 | -2.23938 |
| C  | 2.90027 | -1.63354 | -0.65963 |
| H  | 3.71883 | -2.33108 | -0.85415 |
| Br | 0.10892 | 1.98171  | -0.34803 |

#### NNBe+IPha3

|    |          |          |          |
|----|----------|----------|----------|
| C  | -1.56207 | -0.17520 | 1.52184  |
| C  | -2.66401 | -0.38857 | 0.76440  |
| H  | -1.52325 | 0.36535  | 2.46969  |
| H  | -3.63884 | 0.04054  | 1.02882  |
| Be | -1.01166 | -1.45814 | -0.52061 |
| C  | -3.70183 | -1.27972 | -1.24249 |
| H  | -4.55368 | -1.76438 | -0.72601 |
| H  | -4.05391 | -0.30384 | -1.63171 |
| H  | -3.44440 | -1.90755 | -2.11069 |
| C  | 0.10382  | -1.86776 | 1.98839  |
| H  | -0.75221 | -2.46982 | 2.33156  |
| H  | 0.84162  | -2.53061 | 1.51273  |
| H  | 0.57392  | -1.38238 | 2.86158  |
| N  | -0.40520 | -0.87903 | 1.02596  |
| N  | -2.55001 | -1.14447 | -0.38345 |
| C  | 0.70245  | -0.24317 | 0.12500  |
| C  | 2.05383  | -0.32355 | 0.75486  |
| C  | 0.54519  | -1.03575 | -1.20178 |
| H  | 2.27395  | 0.35571  | 1.58364  |
| H  | 0.31834  | -0.40720 | -2.08033 |
| C  | 2.97608  | -1.21127 | 0.33230  |
| C  | 1.62185  | -1.98360 | -1.51762 |
| H  | 3.94547  | -1.24273 | 0.84103  |
| H  | 1.49248  | -2.58421 | -2.42592 |
| C  | 2.74905  | -2.11136 | -0.78425 |
| H  | 3.52233  | -2.83340 | -1.05762 |
| I  | 0.24123  | 1.89398  | -0.17841 |

#### NNBe+ClPha3

|   |         |          |         |
|---|---------|----------|---------|
| C | 1.47290 | -1.11875 | 1.04204 |
|---|---------|----------|---------|

|    |          |          |          |
|----|----------|----------|----------|
| C  | 2.57187  | -0.47509 | 0.58405  |
| H  | 1.45091  | -2.08933 | 1.54126  |
| H  | 3.57211  | -0.92268 | 0.64642  |
| Be | 0.87211  | 1.02840  | -0.04240 |
| C  | 3.58961  | 1.40669  | -0.56337 |
| H  | 4.38056  | 1.58392  | 0.19203  |
| H  | 4.03532  | 0.81196  | -1.38536 |
| H  | 3.30939  | 2.38713  | -0.98090 |
| C  | -0.35464 | -0.03061 | 2.21075  |
| H  | 0.42707  | 0.34483  | 2.88961  |
| H  | -1.13195 | 0.74027  | 2.09885  |
| H  | -0.81123 | -0.93335 | 2.65317  |
| N  | 0.27834  | -0.32127 | 0.91783  |
| N  | 2.42656  | 0.77012  | 0.00603  |
| C  | -0.73054 | -0.45285 | -0.27027 |
| C  | -2.08978 | -0.88724 | 0.17394  |
| C  | -0.65582 | 0.96576  | -0.90138 |
| H  | -2.23632 | -1.95163 | 0.37867  |
| H  | -0.43422 | 0.94337  | -1.98326 |
| C  | -3.08804 | 0.00460  | 0.31998  |
| C  | -1.80970 | 1.83502  | -0.62526 |
| H  | -4.06424 | -0.34753 | 0.67037  |
| H  | -1.74399 | 2.86802  | -0.98731 |
| C  | -2.93484 | 1.41359  | -0.00676 |
| H  | -3.76634 | 2.09861  | 0.17746  |
| Cl | -0.07270 | -1.69152 | -1.41123 |

NNBe+FPha3

|    |          |          |          |
|----|----------|----------|----------|
| C  | -1.45300 | -1.56174 | -0.05018 |
| C  | -2.55454 | -0.77781 | 0.00635  |
| H  | -1.42029 | -2.64429 | 0.08793  |
| H  | -3.54579 | -1.18838 | 0.23784  |
| Be | -0.87596 | 0.83125  | -0.36029 |
| C  | -3.59237 | 1.41565  | -0.08304 |
| H  | -4.38523 | 1.14861  | -0.80957 |
| H  | -4.03438 | 1.36127  | 0.93184  |
| H  | -3.32008 | 2.46731  | -0.26788 |
| C  | 0.36471  | -1.30639 | -1.65232 |
| H  | -0.41079 | -1.37717 | -2.43116 |
| H  | 1.14341  | -0.60268 | -1.98461 |
| H  | 0.82520  | -2.30038 | -1.51109 |
| N  | -0.27119 | -0.82451 | -0.42314 |
| N  | -2.42495 | 0.57894  | -0.21820 |
| C  | 0.70994  | -0.28147 | 0.65810  |
| C  | 2.06772  | -0.89069 | 0.57458  |

|   |         |          |          |
|---|---------|----------|----------|
| C | 0.64418 | 1.24362  | 0.41349  |
| H | 2.19106 | -1.88359 | 1.01811  |
| H | 0.41056 | 1.79167  | 1.34586  |
| C | 3.08164 | -0.23556 | -0.02181 |
| C | 1.81300 | 1.81978  | -0.26701 |
| H | 4.06286 | -0.71720 | -0.09103 |
| H | 1.76291 | 2.88391  | -0.52622 |
| C | 2.93818 | 1.11900  | -0.53564 |
| H | 3.78258 | 1.58557  | -1.04949 |
| F | 0.13312 | -0.59966 | 1.85832  |

NNBe+IPha2

|    |          |          |          |
|----|----------|----------|----------|
| C  | -1.32149 | -1.04199 | 1.64825  |
| C  | -2.28665 | -1.35078 | 0.73765  |
| H  | -1.48977 | -0.72196 | 2.67890  |
| H  | -3.35877 | -1.27111 | 0.95495  |
| Be | -0.28240 | -1.68873 | -0.44134 |
| C  | -2.83453 | -1.92990 | -1.55394 |
| H  | -3.62053 | -2.66161 | -1.28190 |
| H  | -3.33560 | -0.97728 | -1.81781 |
| H  | -2.33638 | -2.30650 | -2.46199 |
| C  | 0.96062  | -1.68894 | 2.10595  |
| H  | 0.58158  | -2.60932 | 2.58134  |
| H  | 1.91278  | -1.92415 | 1.61163  |
| H  | 1.14787  | -0.93793 | 2.89591  |
| N  | -0.02104 | -1.22478 | 1.14196  |
| N  | -1.86412 | -1.75948 | -0.50124 |
| C  | 0.80183  | 0.08398  | -0.00654 |
| C  | 2.04879  | 0.47011  | 0.65008  |
| C  | 0.94649  | -0.71537 | -1.26337 |
| H  | 1.99821  | 1.16185  | 1.49490  |
| H  | 0.31314  | -0.40396 | -2.10940 |
| C  | 3.24947  | -0.00043 | 0.22269  |
| C  | 2.27305  | -1.15853 | -1.64395 |
| H  | 4.15287  | 0.31789  | 0.75366  |
| H  | 2.35845  | -1.72849 | -2.57577 |
| C  | 3.38291  | -0.86723 | -0.91744 |
| H  | 4.37018  | -1.22342 | -1.22012 |
| I  | -0.59795 | 1.73821  | -0.07736 |

NNBe+ClPha2

|   |          |          |          |
|---|----------|----------|----------|
| C | -1.57183 | -1.56521 | -0.46028 |
| C | -2.59207 | -0.67210 | -0.33088 |
| H | -1.65281 | -2.65008 | -0.36109 |

|    |          |          |          |
|----|----------|----------|----------|
| H  | -3.61926 | -0.96949 | -0.08671 |
| Be | -0.72513 | 0.67612  | -0.79161 |
| C  | -3.28567 | 1.65470  | -0.24652 |
| H  | -4.15214 | 1.57309  | -0.93277 |
| H  | -3.67102 | 1.59877  | 0.79092  |
| H  | -2.85135 | 2.65846  | -0.38537 |
| C  | 0.53406  | -1.71007 | -1.64714 |
| H  | -0.01422 | -2.00001 | -2.55982 |
| H  | 1.40125  | -1.10510 | -1.94701 |
| H  | 0.90058  | -2.62932 | -1.15286 |
| N  | -0.35071 | -0.94770 | -0.78745 |
| N  | -2.28275 | 0.65352  | -0.50803 |
| C  | 0.70881  | -0.07422 | 0.59540  |
| C  | 2.00005  | -0.75238 | 0.60206  |
| C  | 0.68670  | 1.32413  | 0.06893  |
| H  | 2.07182  | -1.70593 | 1.13100  |
| H  | 0.15442  | 2.05460  | 0.69913  |
| C  | 3.07800  | -0.20638 | -0.01672 |
| C  | 1.89392  | 1.81885  | -0.56198 |
| H  | 4.02783  | -0.75073 | 0.00620  |
| H  | 1.87085  | 2.84483  | -0.94546 |
| C  | 3.02976  | 1.07953  | -0.66273 |
| H  | 3.92059  | 1.47445  | -1.15617 |
| Cl | -0.23189 | -0.37764 | 2.06435  |

NNBr+BrPha2

|    |          |          |          |
|----|----------|----------|----------|
| C  | -1.52711 | -0.39031 | 1.66556  |
| C  | -2.53466 | -0.59028 | 0.77092  |
| H  | -1.63485 | 0.02035  | 2.67205  |
| H  | -3.57888 | -0.32674 | 0.97897  |
| Be | -0.61941 | -1.32501 | -0.37252 |
| C  | -3.18527 | -1.23113 | -1.47882 |
| H  | -4.04991 | -1.85517 | -1.17700 |
| H  | -3.57443 | -0.23701 | -1.77621 |
| H  | -2.74280 | -1.69582 | -2.37501 |
| C  | 0.62689  | -1.37197 | 2.16799  |
| H  | 0.11100  | -2.18406 | 2.70822  |
| H  | 1.51932  | -1.79451 | 1.68624  |
| H  | 0.94967  | -0.61185 | 2.90370  |
| N  | -0.27798 | -0.81775 | 1.17835  |
| N  | -2.19103 | -1.13717 | -0.43969 |
| C  | 0.74436  | 0.28266  | -0.05263 |
| C  | 2.03148  | 0.52042  | 0.59297  |
| C  | 0.75575  | -0.61843 | -1.24492 |
| H  | 2.08231  | 1.28723  | 1.36994  |

|    |          |          |          |
|----|----------|----------|----------|
| H  | 0.19190  | -0.25700 | -2.11971 |
| C  | 3.13876  | -0.17651 | 0.22875  |
| C  | 1.99217  | -1.30513 | -1.56027 |
| H  | 4.08174  | 0.03305  | 0.74452  |
| H  | 1.98884  | -1.95588 | -2.44175 |
| C  | 3.12918  | -1.14727 | -0.83356 |
| H  | 4.04423  | -1.68771 | -1.08590 |
| Br | -0.30448 | 1.89764  | -0.20870 |

NNBe+FPha2

|    |          |          |          |
|----|----------|----------|----------|
| C  | 1.59081  | 1.63247  | -0.01791 |
| C  | 2.60444  | 0.72758  | 0.03828  |
| H  | 1.66378  | 2.69496  | 0.22629  |
| H  | 3.61870  | 0.97936  | 0.37074  |
| Be | 0.76829  | -0.52511 | -0.72387 |
| C  | 3.28213  | -1.59818 | -0.15188 |
| H  | 4.23024  | -1.38754 | -0.68587 |
| H  | 3.52726  | -1.75022 | 0.91869  |
| H  | 2.89348  | -2.55352 | -0.54203 |
| C  | -0.50223 | 1.95008  | -1.20956 |
| H  | 0.03975  | 2.40225  | -2.05838 |
| H  | -1.35794 | 1.38885  | -1.61267 |
| H  | -0.89107 | 2.76646  | -0.57124 |
| N  | 0.38591  | 1.06877  | -0.48070 |
| N  | 2.30255  | -0.55999 | -0.34530 |
| C  | -0.66699 | -0.03819 | 0.76923  |
| C  | -1.93810 | 0.63908  | 0.92309  |
| C  | -0.65206 | -1.31952 | 0.02917  |
| H  | -1.97725 | 1.48254  | 1.61713  |
| H  | -0.09193 | -2.13214 | 0.51999  |
| C  | -3.02865 | 0.21741  | 0.22967  |
| C  | -1.86422 | -1.69735 | -0.66171 |
| H  | -3.97568 | 0.75217  | 0.35586  |
| H  | -1.85889 | -2.64830 | -1.20493 |
| C  | -2.99403 | -0.93751 | -0.62680 |
| H  | -3.89218 | -1.23569 | -1.17220 |
| F  | 0.13253  | 0.03606  | 1.84296  |

NPBe+FPhab1

|    |         |          |          |
|----|---------|----------|----------|
| C  | 1.86441 | 1.88627  | -0.27375 |
| C  | 2.88723 | 1.09269  | 0.12146  |
| H  | 2.03239 | 2.92682  | -0.59156 |
| H  | 3.90599 | 1.49452  | 0.13880  |
| Be | 0.53971 | -0.03257 | 0.23674  |

|   |          |          |          |
|---|----------|----------|----------|
| C | 3.03997  | -1.73469 | -0.53040 |
| H | 2.73178  | -1.42590 | -1.54432 |
| H | 4.14056  | -1.81836 | -0.51634 |
| H | 2.63540  | -2.74304 | -0.32532 |
| C | -0.47689 | 2.32225  | -0.80277 |
| H | -0.08701 | 3.34776  | -0.93718 |
| H | -0.86674 | 1.98565  | -1.78597 |
| H | -1.34420 | 2.39102  | -0.11832 |
| N | 0.53860  | 1.44293  | -0.28506 |
| P | 2.46552  | -0.55199 | 0.81520  |
| C | -2.30205 | -0.17209 | 0.86191  |
| C | -1.23560 | -1.07640 | 0.92552  |
| C | -2.93147 | 0.13099  | -0.33639 |
| H | -0.81194 | -1.34552 | 1.89748  |
| H | -3.75649 | 0.84641  | -0.34146 |
| C | -0.80387 | -1.69506 | -0.26366 |
| C | -2.47519 | -0.47173 | -1.51093 |
| H | -0.01837 | -2.45408 | -0.22213 |
| H | -2.95807 | -0.22696 | -2.46047 |
| C | -1.41292 | -1.37258 | -1.48399 |
| H | -1.06181 | -1.84200 | -2.40536 |
| F | -2.70836 | 0.41281  | 1.97674  |

NPBe+ClPhab1

|    |          |          |          |
|----|----------|----------|----------|
| C  | -3.07144 | -0.05038 | -0.32457 |
| C  | -2.85426 | 1.13105  | 0.29730  |
| H  | -4.06178 | -0.32612 | -0.71821 |
| H  | -3.67980 | 1.84074  | 0.41910  |
| Be | -0.75578 | -0.40414 | 0.15551  |
| C  | -0.44888 | 2.68699  | -0.10898 |
| H  | -0.58949 | 2.44133  | -1.17506 |
| H  | -0.89260 | 3.68033  | 0.07913  |
| H  | 0.63484  | 2.76557  | 0.09397  |
| C  | -2.37036 | -2.20782 | -1.18919 |
| H  | -3.10410 | -2.82973 | -0.63667 |
| H  | -2.79016 | -2.02040 | -2.19814 |
| H  | -1.46241 | -2.82203 | -1.32683 |
| N  | -2.04656 | -0.98840 | -0.49591 |
| P  | -1.19984 | 1.41571  | 1.05482  |
| C  | 1.91872  | -0.17362 | -0.42783 |
| C  | 1.08550  | -1.30409 | -0.49049 |
| C  | 2.41982  | 0.27515  | 0.79097  |
| H  | 0.75497  | -1.68249 | -1.46126 |
| H  | 3.06287  | 1.15693  | 0.82037  |
| C  | 0.75156  | -1.97461 | 0.69886  |

|    |         |          |          |
|----|---------|----------|----------|
| C  | 2.07515 | -0.39927 | 1.96372  |
| H  | 0.12926 | -2.87249 | 0.65388  |
| H  | 2.45361 | -0.03213 | 2.92091  |
| C  | 1.23930 | -1.51168 | 1.92781  |
| H  | 0.96173 | -2.02412 | 2.85127  |
| Cl | 2.32112 | 0.65847  | -1.88946 |

NPBe+BrPhab1

|    |          |          |          |
|----|----------|----------|----------|
| C  | 3.27718  | -0.59472 | -0.69005 |
| C  | 3.10328  | -1.30031 | 0.45069  |
| H  | 4.15663  | -0.74103 | -1.33562 |
| H  | 3.85436  | -2.03884 | 0.75136  |
| Be | 1.21652  | 0.42382  | -0.03535 |
| C  | 0.52585  | -2.31571 | 1.28323  |
| H  | 0.37775  | -2.58133 | 0.22287  |
| H  | 0.91758  | -3.20234 | 1.81183  |
| H  | -0.45760 | -2.07572 | 1.72733  |
| C  | 2.60232  | 1.03728  | -2.35453 |
| H  | 3.55286  | 1.60852  | -2.34445 |
| H  | 2.64989  | 0.33176  | -3.20884 |
| H  | 1.79432  | 1.75792  | -2.57449 |
| N  | 2.34956  | 0.36846  | -1.10501 |
| P  | 1.68269  | -0.85521 | 1.53465  |
| C  | -1.54822 | 0.51269  | 0.01328  |
| C  | -0.64090 | 1.29794  | -0.71920 |
| C  | -1.77169 | 0.76104  | 1.36485  |
| H  | -0.51585 | 1.13479  | -1.79286 |
| H  | -2.47504 | 0.14180  | 1.92545  |
| C  | 0.04972  | 2.33431  | -0.06773 |
| C  | -1.07583 | 1.79268  | 1.99950  |
| H  | 0.73202  | 2.96857  | -0.64024 |
| H  | -1.23996 | 1.97106  | 3.06495  |
| C  | -0.16297 | 2.57276  | 1.29658  |
| H  | 0.38874  | 3.36817  | 1.80222  |
| Br | -2.46976 | -0.87650 | -0.85750 |

NPBe+IPhab1

|    |          |          |          |
|----|----------|----------|----------|
| C  | -3.45091 | -1.15457 | 0.63291  |
| C  | -3.31815 | -1.45649 | -0.67889 |
| H  | -4.23000 | -1.61511 | 1.25950  |
| H  | -4.00062 | -2.17842 | -1.14066 |
| Be | -1.61243 | 0.30930  | 0.18968  |
| C  | -0.74350 | -1.78192 | -1.95819 |
| H  | -0.46638 | -2.34286 | -1.04943 |



|   |          |          |          |
|---|----------|----------|----------|
| H | -1.06965 | -2.50460 | -2.72656 |
| H | 0.15729  | -1.27195 | -2.34640 |
| C | -2.81663 | 0.00857  | 2.66593  |
| H | -3.81178 | 0.45093  | 2.87652  |
| H | -2.73210 | -0.91806 | 3.26900  |
| H | -2.05962 | 0.71512  | 3.05114  |
| N | -2.60695 | -0.23147 | 1.26195  |
| P | -2.08876 | -0.50284 | -1.66347 |
| C | 1.09707  | 0.87079  | -0.01772 |
| C | 0.17722  | 1.24393  | 0.97938  |
| C | 1.11514  | 1.53744  | -1.24123 |
| H | 0.19889  | 0.76233  | 1.96083  |
| H | 1.82758  | 1.24755  | -2.01676 |
| C | -0.73033 | 2.28709  | 0.72642  |
| C | 0.20446  | 2.56993  | -1.48159 |
| H | -1.42400 | 2.60019  | 1.51151  |
| H | 0.21185  | 3.07359  | -2.45131 |
| C | -0.72063 | 2.94244  | -0.51231 |
| H | -1.44063 | 3.73896  | -0.71191 |
| I | 2.45258  | -0.68368 | 0.36200  |

NPBe+IPha3

|    |          |          |          |
|----|----------|----------|----------|
| C  | 1.13990  | -1.55023 | 0.01550  |
| C  | 2.44717  | -1.52957 | 0.33255  |
| H  | 0.40579  | -2.27352 | 0.38814  |
| H  | 2.81196  | -2.29288 | 1.03253  |
| Be | 1.80677  | 0.67245  | -0.18762 |
| C  | 4.60053  | 0.11800  | 1.18754  |
| H  | 3.97227  | 0.38963  | 2.05194  |
| H  | 5.24462  | -0.73358 | 1.46779  |
| H  | 5.26274  | 0.97080  | 0.96023  |
| C  | 0.46852  | -0.98050 | -2.25669 |
| H  | 1.29930  | -1.65910 | -2.49630 |
| H  | -0.49143 | -1.51869 | -2.35849 |
| H  | 0.49743  | -0.13101 | -2.95490 |
| N  | 0.64917  | -0.51222 | -0.88041 |
| P  | 3.63350  | -0.28683 | -0.36170 |
| C  | -0.33794 | 0.44262  | -0.32632 |
| C  | -0.91165 | 1.36382  | -1.32439 |
| C  | 0.37541  | 1.15778  | 0.78113  |
| H  | -1.30857 | 0.94702  | -2.25250 |
| H  | 0.55471  | 0.54033  | 1.67541  |
| C  | -1.11321 | 2.67665  | -1.04330 |
| C  | -0.01240 | 2.52329  | 1.08455  |
| H  | -1.61906 | 3.29542  | -1.79108 |

|   |          |          |         |
|---|----------|----------|---------|
| H | 0.31359  | 2.94604  | 2.04002 |
| C | -0.71794 | 3.27543  | 0.20393 |
| H | -0.96962 | 4.31728  | 0.41356 |
| I | -2.22411 | -0.84120 | 0.41954 |

NPBe+BrPha3

|    |          |          |          |
|----|----------|----------|----------|
| C  | -1.03487 | -1.52921 | -0.16639 |
| C  | -2.34019 | -1.28665 | -0.38795 |
| H  | -0.44465 | -2.31564 | -0.64868 |
| H  | -2.85919 | -1.92398 | -1.11604 |
| Be | -1.32970 | 0.73460  | 0.20515  |
| C  | -4.28493 | 0.69832  | -0.96349 |
| H  | -3.69052 | 0.94097  | -1.85992 |
| H  | -5.06030 | -0.03773 | -1.23840 |
| H  | -4.80288 | 1.61535  | -0.63465 |
| C  | -0.17395 | -1.24920 | 2.09318  |
| H  | -1.10913 | -1.76595 | 2.35210  |
| H  | 0.66098  | -1.97306 | 2.09298  |
| H  | 0.01083  | -0.46414 | 2.84104  |
| N  | -0.33921 | -0.65353 | 0.76500  |
| P  | -3.27308 | 0.06093  | 0.47469  |
| C  | 0.78677  | 0.14607  | 0.20219  |
| C  | 1.55834  | 0.87787  | 1.23971  |
| C  | 0.11745  | 1.07958  | -0.78187 |
| H  | 1.96162  | 0.30559  | 2.07827  |
| H  | -0.14969 | 0.58797  | -1.73097 |
| C  | 1.91524  | 2.17433  | 1.08124  |
| C  | 0.67663  | 2.41292  | -0.96248 |
| H  | 2.55241  | 2.63215  | 1.84485  |
| H  | 0.35714  | 2.97990  | -1.84298 |
| C  | 1.52230  | 2.96393  | -0.06087 |
| H  | 1.90119  | 3.98180  | -0.17615 |
| Br | 2.14299  | -1.18768 | -0.65763 |

NPBe+ClPha3

|    |          |          |          |
|----|----------|----------|----------|
| C  | -1.01880 | -1.49769 | -0.48006 |
| C  | -2.26671 | -0.99331 | -0.51915 |
| H  | -0.63021 | -2.27329 | -1.14770 |
| H  | -2.95039 | -1.38716 | -1.28292 |
| Be | -0.84570 | 0.67401  | 0.26615  |
| C  | -3.83277 | 1.37107  | -0.56026 |
| H  | -3.27741 | 1.64178  | -1.47356 |
| H  | -4.76418 | 0.85365  | -0.84918 |
| H  | -4.12009 | 2.30251  | -0.04326 |

|    |          |          |          |
|----|----------|----------|----------|
| C  | 0.04718  | -1.77613 | 1.69033  |
| H  | -0.95040 | -2.14066 | 1.97498  |
| H  | 0.70908  | -2.63621 | 1.48307  |
| H  | 0.45421  | -1.18386 | 2.52297  |
| N  | -0.09851 | -0.93759 | 0.49789  |
| P  | -2.85609 | 0.32246  | 0.64243  |
| C  | 1.12849  | -0.28527 | -0.06678 |
| C  | 2.12002  | 0.07737  | 0.98702  |
| C  | 0.57122  | 0.93880  | -0.77834 |
| H  | 2.49073  | -0.72533 | 1.62912  |
| H  | 0.17930  | 0.70259  | -1.78075 |
| C  | 2.68382  | 1.30444  | 1.05201  |
| C  | 1.34327  | 2.17704  | -0.74092 |
| H  | 3.46076  | 1.47663  | 1.80429  |
| H  | 1.05921  | 2.96634  | -1.44486 |
| C  | 2.33545  | 2.38252  | 0.15448  |
| H  | 2.87070  | 3.33286  | 0.21134  |
| Cl | 1.98326  | -1.53486 | -1.18940 |

NPBe+FPha3

|    |          |          |          |
|----|----------|----------|----------|
| C  | -1.13980 | 1.59989  | -0.22691 |
| C  | -2.34560 | 1.15944  | 0.15971  |
| Be | -0.61202 | -0.89799 | 0.22530  |
| N  | -0.09471 | 0.63527  | -0.47774 |
| C  | 0.28149  | 0.57806  | -1.89644 |
| H  | 0.99617  | -0.24327 | -2.06455 |
| H  | -0.63016 | 0.39123  | -2.48572 |
| H  | 0.74486  | 1.52118  | -2.23483 |
| H  | -0.90422 | 2.65331  | -0.42572 |
| H  | -3.14865 | 1.90089  | 0.26720  |
| P  | -2.65100 | -0.60333 | 0.64157  |
| C  | -3.65339 | -1.19225 | -0.82984 |
| H  | -3.17543 | -1.00755 | -1.80660 |
| H  | -3.82204 | -2.27769 | -0.72155 |
| H  | -4.64264 | -0.70273 | -0.82702 |
| C  | 1.09828  | 0.51404  | 0.51694  |
| C  | 1.02743  | -0.97634 | 0.88688  |
| C  | 2.39274  | 0.98594  | -0.04653 |
| H  | 0.90777  | -1.12592 | 1.97610  |
| H  | 2.55859  | 2.06732  | -0.07289 |
| C  | 2.09146  | -1.82252 | 0.33330  |
| C  | 3.31072  | 0.10529  | -0.49183 |
| H  | 2.02988  | -2.89718 | 0.54004  |
| H  | 4.24649  | 0.48225  | -0.91833 |
| C  | 3.13393  | -1.33346 | -0.37776 |

|             |          |          |          |
|-------------|----------|----------|----------|
| H           | 3.89839  | -1.99928 | -0.78580 |
| F           | 0.73705  | 1.30267  | 1.57933  |
| NPBe+BrPhb3 |          |          |          |
| C           | 1.75470  | -1.48630 | -0.24512 |
| C           | 2.87827  | -0.78491 | -0.57460 |
| H           | 1.58963  | -2.45737 | -0.72473 |
| H           | 3.63974  | -1.24898 | -1.22247 |
| Be          | 1.70525  | 1.14151  | 0.01936  |
| C           | 4.46522  | 1.01689  | -0.21557 |
| H           | 5.04210  | 0.64616  | 0.65240  |
| H           | 4.99850  | 0.70776  | -1.13526 |
| H           | 4.47066  | 2.11802  | -0.17754 |
| C           | -0.21003 | -2.47885 | 1.55588  |
| H           | 0.53236  | -3.15915 | 2.00546  |
| H           | -0.98291 | -2.26302 | 2.31186  |
| H           | -0.68471 | -2.96343 | 0.68638  |
| P           | 0.64673  | -0.92727 | 1.06908  |
| N           | 3.10614  | 0.52374  | -0.21208 |
| C           | -0.67705 | 0.15435  | 0.26913  |
| C           | -1.56915 | 0.71817  | 1.33031  |
| C           | 0.07236  | 1.24604  | -0.51379 |
| H           | -1.95411 | 0.02768  | 2.08837  |
| H           | 0.27312  | 0.87076  | -1.53737 |
| C           | -1.95579 | 2.00775  | 1.33696  |
| C           | -0.59521 | 2.56796  | -0.58360 |
| H           | -2.63594 | 2.35650  | 2.12068  |
| H           | -0.27873 | 3.25468  | -1.37708 |
| C           | -1.53071 | 2.94640  | 0.30660  |
| H           | -1.98359 | 3.94045  | 0.26518  |
| Br          | -1.88819 | -0.90281 | -0.98806 |

NPBe+IPhb3

|    |          |          |          |
|----|----------|----------|----------|
| C  | 1.81396  | -1.64055 | -0.14217 |
| C  | 2.98177  | -1.13463 | -0.63971 |
| H  | 1.47045  | -2.61623 | -0.50290 |
| H  | 3.60487  | -1.75652 | -1.30275 |
| Be | 2.15203  | 0.98409  | -0.08820 |
| C  | 4.82014  | 0.44969  | -0.62132 |
| H  | 5.43983  | 0.10327  | 0.22711  |
| H  | 5.20510  | -0.03101 | -1.54100 |
| H  | 4.96760  | 1.53677  | -0.72434 |
| C  | -0.02647 | -2.15138 | 1.98116  |
| H  | 0.67731  | -2.84970 | 2.46373  |
| H  | -0.69066 | -1.73692 | 2.75733  |
| H  | -0.63851 | -2.69114 | 1.23879  |

|   |          |          |          |
|---|----------|----------|----------|
| P | 0.94668  | -0.80567 | 1.19848  |
| N | 3.41877  | 0.15094  | -0.42666 |
| C | -0.29137 | 0.39230  | 0.44182  |
| C | -0.95799 | 1.18067  | 1.51631  |
| C | 0.50640  | 1.27503  | -0.52482 |
| H | -1.33081 | 0.64070  | 2.39327  |
| H | 0.58529  | 0.77156  | -1.50854 |
| C | -1.16768 | 2.50843  | 1.40993  |
| C | 0.00662  | 2.65778  | -0.69786 |
| H | -1.68741 | 3.03251  | 2.21837  |
| H | 0.30935  | 3.19991  | -1.60080 |
| C | -0.76396 | 3.25788  | 0.22990  |
| H | -1.09231 | 4.29366  | 0.11047  |
| I | -1.98280 | -0.67125 | -0.69030 |

NPBe+ClPhb3

|    |          |          |          |
|----|----------|----------|----------|
| C  | 1.75094  | 1.29335  | 0.42659  |
| C  | 2.76016  | 0.38121  | 0.52482  |
| H  | 1.81128  | 2.19940  | 1.03989  |
| H  | 3.65600  | 0.61902  | 1.12176  |
| Be | 1.20818  | -1.23171 | -0.10704 |
| C  | 3.95361  | -1.57681 | -0.27621 |
| H  | 4.46587  | -1.18428 | -1.17454 |
| H  | 4.64877  | -1.47976 | 0.58012  |
| H  | 3.76606  | -2.65040 | -0.43753 |
| C  | -0.19254 | 2.85339  | -0.92971 |
| H  | 0.61976  | 3.49294  | -1.31308 |
| H  | -1.03157 | 2.89869  | -1.64354 |
| H  | -0.53482 | 3.22501  | 0.05024  |
| P  | 0.43151  | 1.12725  | -0.80286 |
| N  | 2.71086  | -0.88513 | -0.01879 |
| C  | -0.97672 | 0.17670  | 0.03114  |
| C  | -2.06050 | -0.07132 | -0.97714 |
| C  | -0.36355 | -1.12944 | 0.57446  |
| H  | -2.39427 | 0.78120  | -1.57847 |
| H  | -0.02782 | -0.93888 | 1.61412  |
| C  | -2.66549 | -1.26530 | -1.10807 |
| C  | -1.24380 | -2.32410 | 0.54084  |
| H  | -3.47188 | -1.37710 | -1.84022 |
| H  | -0.97834 | -3.16593 | 1.19103  |
| C  | -2.30852 | -2.40924 | -0.27672 |
| H  | -2.91866 | -3.31545 | -0.31956 |
| Cl | -1.75373 | 1.14935  | 1.41954  |

NPBe+FPhb3

|    |          |          |          |
|----|----------|----------|----------|
| C  | -2.30363 | 0.43386  | 0.78410  |
| C  | -1.32632 | 1.37177  | 0.79681  |
| Be | -1.04965 | -0.96169 | -0.74982 |
| N  | -2.40041 | -0.61563 | -0.12091 |
| C  | -3.70165 | -1.23390 | -0.27701 |
| H  | -3.61600 | -2.16520 | -0.86051 |
| H  | -4.14045 | -1.49486 | 0.70534  |
| H  | -4.41435 | -0.57069 | -0.80244 |
| H  | -3.07219 | 0.44579  | 1.57267  |
| H  | -1.30721 | 2.06340  | 1.64698  |
| P  | -0.10987 | 1.62304  | -0.53552 |
| C  | 0.85209  | 3.04195  | 0.14567  |
| H  | 1.19874  | 2.86850  | 1.17889  |
| H  | 1.72742  | 3.21204  | -0.49992 |
| H  | 0.21982  | 3.94563  | 0.12831  |
| C  | 1.14185  | 0.19284  | -0.30044 |
| C  | 0.62460  | -1.00989 | -1.08945 |
| C  | 1.43202  | -0.17382 | 1.12454  |
| H  | 0.73080  | -0.79929 | -2.16922 |
| H  | 1.51102  | 0.63369  | 1.85933  |
| C  | 1.19406  | -2.32680 | -0.70549 |
| C  | 1.69570  | -1.44470 | 1.48926  |
| H  | 1.16489  | -3.13831 | -1.44166 |
| H  | 1.96052  | -1.65860 | 2.53041  |
| C  | 1.66631  | -2.54683 | 0.53799  |
| H  | 2.02829  | -3.53216 | 0.84371  |
| F  | 2.33422  | 0.68596  | -0.87215 |

NOBe+FPhab1

|    |          |          |          |
|----|----------|----------|----------|
| C  | 1.98822  | 1.79963  | -0.57213 |
| C  | 2.83780  | 0.81089  | -0.19681 |
| H  | 2.25924  | 2.80911  | -0.89453 |
| H  | 3.92936  | 0.88453  | -0.16714 |
| Be | 0.68808  | 0.04390  | -0.03998 |
| C  | 2.93437  | -1.50655 | 0.59775  |
| H  | 3.53771  | -1.29906 | 1.50557  |
| H  | 2.25687  | -2.34429 | 0.84364  |
| H  | 3.63302  | -1.86782 | -0.18507 |
| N  | 2.17405  | -0.36743 | 0.17312  |
| O  | 0.67477  | 1.48190  | -0.52479 |
| C  | -1.85325 | 0.12211  | 0.90374  |
| C  | -2.58339 | 0.56565  | -0.18370 |
| C  | -0.90085 | -0.90574 | 0.78644  |
| H  | -3.29709 | 1.38129  | -0.05190 |
| H  | -0.41773 | -1.29624 | 1.68607  |

|   |          |          |          |
|---|----------|----------|----------|
| C | -2.37959 | -0.03814 | -1.43050 |
| C | -0.70935 | -1.50130 | -0.47845 |
| H | -2.95124 | 0.31420  | -2.29273 |
| H | -0.01589 | -2.34042 | -0.57775 |
| C | -1.44988 | -1.05840 | -1.58618 |
| H | -1.28862 | -1.51776 | -2.56346 |
| F | -2.03544 | 0.67654  | 2.08919  |

NOBe+ClPhab1

|    |          |          |          |
|----|----------|----------|----------|
| C  | 2.19989  | 0.00587  | 1.87814  |
| C  | 2.99298  | -0.33328 | 0.83100  |
| H  | 2.48346  | 0.03028  | 2.93430  |
| H  | 4.04364  | -0.63244 | 0.89705  |
| Be | 0.90676  | 0.18437  | 0.04774  |
| C  | 3.03137  | -0.59705 | -1.60582 |
| H  | 3.44249  | -1.62727 | -1.59029 |
| H  | 2.34974  | -0.53219 | -2.47322 |
| H  | 3.87908  | 0.09178  | -1.80238 |
| N  | 2.32621  | -0.27119 | -0.40060 |
| O  | 0.92980  | 0.33880  | 1.55665  |
| C  | -1.77030 | -0.37268 | -0.17089 |
| C  | -2.33986 | 0.65511  | 0.56413  |
| C  | -0.75623 | -0.11009 | -1.11552 |
| H  | -3.11102 | 0.42900  | 1.30279  |
| H  | -0.37853 | -0.91761 | -1.74748 |
| C  | -1.90654 | 1.97304  | 0.36206  |
| C  | -0.33062 | 1.21948  | -1.30634 |
| H  | -2.35350 | 2.77713  | 0.95190  |
| H  | 0.41067  | 1.44178  | -2.07859 |
| C  | -0.91032 | 2.25992  | -0.55864 |
| H  | -0.56807 | 3.28650  | -0.70540 |
| Cl | -2.28289 | -2.00579 | 0.07074  |

NOBe+BrPhab1

|    |         |          |          |
|----|---------|----------|----------|
| C  | 2.60654 | -0.22865 | 1.85810  |
| C  | 3.21708 | -0.87916 | 0.83606  |
| H  | 2.91211 | -0.22559 | 2.90836  |
| H  | 4.11253 | -1.50276 | 0.91989  |
| Be | 1.39965 | 0.24546  | 0.02208  |
| C  | 3.08960 | -1.32419 | -1.57080 |
| H  | 3.05695 | -2.43065 | -1.49313 |
| H  | 2.48638 | -1.04094 | -2.45243 |
| H  | 4.14008 | -1.04148 | -1.78866 |
| N  | 2.58066 | -0.67740 | -0.39660 |

|    |          |          |          |
|----|----------|----------|----------|
| O  | 1.51010  | 0.48413  | 1.51582  |
| C  | -1.36071 | 0.34595  | -0.19718 |
| C  | -1.65454 | 1.49838  | 0.51435  |
| C  | -0.30891 | 0.32858  | -1.13671 |
| H  | -2.46131 | 1.49640  | 1.25005  |
| H  | -0.13363 | -0.56039 | -1.74771 |
| C  | -0.89844 | 2.65996  | 0.29759  |
| C  | 0.44075  | 1.50284  | -1.34680 |
| H  | -1.12930 | 3.56105  | 0.87117  |
| H  | 1.21263  | 1.51744  | -2.12116 |
| C  | 0.14046  | 2.66928  | -0.61958 |
| H  | 0.73119  | 3.57370  | -0.77985 |
| Br | -2.35151 | -1.22565 | 0.09099  |

NOBe+IPhab1

|    |          |          |          |
|----|----------|----------|----------|
| C  | 2.79185  | -0.75543 | 1.88324  |
| C  | 3.41330  | -1.32627 | 0.82104  |
| H  | 3.00936  | -0.92895 | 2.94100  |
| H  | 4.23287  | -2.04960 | 0.87328  |
| Be | 1.78264  | 0.08639  | 0.05832  |
| C  | 3.44451  | -1.41491 | -1.62815 |
| H  | 3.31628  | -2.51313 | -1.72087 |
| H  | 2.94064  | -0.95480 | -2.49743 |
| H  | 4.52880  | -1.20157 | -1.72827 |
| N  | 2.89444  | -0.89811 | -0.40914 |
| O  | 1.79981  | 0.10960  | 1.57529  |
| C  | -0.88373 | 0.75664  | -0.19942 |
| C  | -0.95371 | 1.89906  | 0.58434  |
| C  | 0.16872  | 0.59080  | -1.12562 |
| H  | -1.75945 | 2.02101  | 1.31153  |
| H  | 0.18614  | -0.26973 | -1.79983 |
| C  | 0.02358  | 2.89799  | 0.45430  |
| C  | 1.14482  | 1.59997  | -1.24533 |
| H  | -0.03754 | 3.78865  | 1.08475  |
| H  | 1.92617  | 1.50638  | -2.00460 |
| C  | 1.06642  | 2.75522  | -0.44653 |
| H  | 1.83106  | 3.52959  | -0.53902 |
| I  | -2.32564 | -0.75249 | -0.00905 |

NOBe+FPha3

|   |         |          |          |
|---|---------|----------|----------|
| C | 2.92460 | 0.16972  | -0.02520 |
| C | 2.09591 | -0.89453 | 0.00603  |
| H | 3.99447 | 0.11149  | 0.20849  |
| H | 2.37195 | -1.92145 | 0.25510  |



|    |          |          |          |
|----|----------|----------|----------|
| Be | 0.93233  | 1.19844  | -0.44111 |
| C  | 0.27946  | -1.32557 | -1.56600 |
| H  | 0.10320  | -2.38655 | -1.31609 |
| H  | -0.65629 | -0.89335 | -1.95152 |
| H  | 1.05120  | -1.26594 | -2.34907 |
| N  | 0.75155  | -0.56319 | -0.40666 |
| O  | 2.44507  | 1.37610  | -0.34327 |
| C  | -0.32873 | -0.21895 | 0.66512  |
| C  | -0.60612 | 1.27640  | 0.37723  |
| C  | -1.51561 | -1.11824 | 0.60468  |
| H  | -0.49970 | 1.89351  | 1.28907  |
| H  | -1.41533 | -2.09774 | 1.08210  |
| C  | -1.87348 | 1.55337  | -0.31864 |
| C  | -2.64866 | -0.72525 | -0.00653 |
| H  | -2.06123 | 2.59287  | -0.61165 |
| H  | -3.49772 | -1.41548 | -0.05229 |
| C  | -2.81024 | 0.60997  | -0.56327 |
| H  | -3.73503 | 0.85905  | -1.08976 |
| F  | 0.29899  | -0.36647 | 1.87249  |

NOBe+FPPh3

|    |          |          |          |
|----|----------|----------|----------|
| C  | 2.53456  | -0.79303 | -0.40739 |
| C  | 1.42329  | -1.53852 | -0.58224 |
| H  | 3.54158  | -1.22409 | -0.44381 |
| H  | 1.31757  | -2.59758 | -0.80805 |
| Be | 0.81524  | 0.79854  | -0.18244 |
| C  | 3.53145  | 1.37072  | 0.08172  |
| H  | 4.27076  | 1.34588  | -0.74270 |
| H  | 3.23308  | 2.42207  | 0.22247  |
| H  | 4.04701  | 1.04525  | 1.00702  |
| O  | 0.28314  | -0.73001 | -0.63787 |
| N  | 2.36741  | 0.56823  | -0.20631 |
| C  | -0.82106 | -0.56336 | 0.44366  |
| C  | -0.72313 | 0.93150  | 0.68223  |
| C  | -2.08061 | -1.07885 | -0.12480 |
| H  | -0.47596 | 1.15858  | 1.73402  |
| H  | -2.20871 | -2.16458 | -0.14838 |
| C  | -1.82023 | 1.74565  | 0.14978  |
| C  | -3.00864 | -0.22613 | -0.60656 |
| H  | -1.76393 | 2.82764  | 0.31321  |
| H  | -3.92161 | -0.63495 | -1.05210 |
| C  | -2.87250 | 1.21548  | -0.51410 |
| H  | -3.65761 | 1.85331  | -0.92717 |
| F  | -0.38431 | -1.30488 | 1.48761  |

## NOBe+ClPha3

|    |          |          |          |
|----|----------|----------|----------|
| C  | 2.88470  | -0.49095 | -0.06156 |
| C  | 2.08798  | 0.08333  | 0.86349  |
| H  | 3.97027  | -0.34175 | -0.10287 |
| H  | 2.40982  | 0.74085  | 1.67381  |
| Be | 0.84136  | -1.16443 | -0.81283 |
| C  | 0.20638  | -1.00596 | 1.94789  |
| H  | 0.06710  | -0.29861 | 2.78384  |
| H  | -0.75271 | -1.50220 | 1.73948  |
| H  | 0.94779  | -1.76518 | 2.24070  |
| N  | 0.70908  | -0.33119 | 0.74408  |
| O  | 2.35120  | -1.27621 | -1.00182 |
| C  | -0.35915 | 0.51225  | -0.03187 |
| C  | -0.65700 | -0.39585 | -1.25867 |
| C  | -1.54319 | 0.84726  | 0.81619  |
| H  | -0.51039 | 0.11871  | -2.22469 |
| H  | -1.43108 | 1.66709  | 1.53139  |
| C  | -1.95083 | -1.09673 | -1.22603 |
| C  | -2.69867 | 0.16586  | 0.70163  |
| H  | -2.14638 | -1.80197 | -2.04240 |
| H  | -3.53582 | 0.43323  | 1.35513  |
| C  | -2.89528 | -0.88472 | -0.28436 |
| H  | -3.84064 | -1.43261 | -0.30072 |
| Cl | 0.42552  | 2.05655  | -0.55273 |

## NOBe+ClPhb3

|    |          |          |          |
|----|----------|----------|----------|
| C  | 2.55571  | -0.45201 | -0.76819 |
| C  | 1.43822  | -1.08797 | -1.18133 |
| H  | 3.55973  | -0.84830 | -0.95860 |
| H  | 1.32642  | -2.00243 | -1.75993 |
| Be | 0.84814  | 0.97475  | -0.00272 |
| C  | 3.56999  | 1.40664  | 0.42723  |
| H  | 4.29216  | 1.68483  | -0.36514 |
| H  | 3.27532  | 2.33477  | 0.94279  |
| H  | 4.10313  | 0.77272  | 1.16287  |
| O  | 0.30644  | -0.30598 | -0.94445 |
| N  | 2.39907  | 0.75465  | -0.10778 |
| C  | -0.82158 | -0.47995 | 0.12128  |
| C  | -0.70548 | 0.86046  | 0.83344  |
| C  | -2.07172 | -0.73864 | -0.62125 |
| H  | -0.47573 | 0.75978  | 1.90683  |
| H  | -2.22558 | -1.74555 | -1.01775 |
| C  | -1.76998 | 1.83297  | 0.56569  |
| C  | -2.96695 | 0.25165  | -0.81989 |
| H  | -1.69337 | 2.80175  | 1.07215  |

|    |          |          |          |
|----|----------|----------|----------|
| H  | -3.86722 | 0.03490  | -1.40451 |
| C  | -2.81337 | 1.57785  | -0.25466 |
| H  | -3.57478 | 2.33584  | -0.45322 |
| Cl | -0.34392 | -1.87577 | 1.14009  |

NOBe+BrPha3

|    |          |          |          |
|----|----------|----------|----------|
| C  | -2.99111 | 0.42431  | -0.61648 |
| C  | -2.17041 | -0.50606 | -0.08096 |
| H  | -3.88442 | 0.15829  | -1.19513 |
| H  | -2.30575 | -1.58716 | -0.14800 |
| Be | -1.24325 | 1.62623  | -0.10230 |
| C  | -1.25947 | -0.37962 | 2.14655  |
| H  | -0.93438 | -1.42764 | 2.28144  |
| H  | -0.67995 | 0.27465  | 2.81372  |
| H  | -2.32466 | -0.29413 | 2.40394  |
| N  | -1.10094 | 0.03538  | 0.74921  |
| O  | -2.72088 | 1.72546  | -0.48872 |
| C  | 0.29754  | 0.07132  | 0.20048  |
| C  | 0.25688  | 1.14448  | -0.87458 |
| C  | 1.32388  | 0.36261  | 1.23964  |
| H  | -0.17628 | 0.77302  | -1.82005 |
| H  | 1.35396  | -0.28177 | 2.12138  |
| C  | 1.44000  | 1.97204  | -1.08215 |
| C  | 2.31314  | 1.26356  | 1.04054  |
| H  | 1.49052  | 2.55497  | -2.00762 |
| H  | 3.08214  | 1.36556  | 1.81333  |
| C  | 2.42279  | 2.06231  | -0.15858 |
| H  | 3.28348  | 2.72018  | -0.29778 |
| Br | 0.73550  | -1.80863 | -0.50793 |

NOBe+Brphb3

|    |          |          |          |
|----|----------|----------|----------|
| C  | 2.64848  | 0.09112  | 0.90593  |
| C  | 1.50805  | 0.52781  | 1.48339  |
| H  | 3.63065  | 0.50200  | 1.16627  |
| H  | 1.35828  | 1.26156  | 2.27242  |
| Be | 1.01074  | -1.23094 | -0.14657 |
| C  | 3.73890  | -1.34962 | -0.72074 |
| H  | 4.50193  | -1.75983 | -0.03060 |
| H  | 3.48646  | -2.14334 | -1.44189 |
| H  | 4.20614  | -0.52066 | -1.28788 |
| O  | 0.42350  | -0.25748 | 1.08818  |
| N  | 2.54687  | -0.92891 | -0.02385 |
| C  | -0.77135 | 0.06051  | 0.14557  |
| C  | -0.57327 | -1.01984 | -0.90688 |

|    |          |          |          |
|----|----------|----------|----------|
| C  | -1.99415 | -0.02804 | 0.96833  |
| H  | -0.35740 | -0.61977 | -1.91108 |
| H  | -2.20010 | 0.79056  | 1.66283  |
| C  | -1.55911 | -2.10427 | -0.93048 |
| C  | -2.80875 | -1.10129 | 0.87945  |
| H  | -1.43048 | -2.87242 | -1.70152 |
| H  | -3.68881 | -1.14381 | 1.52988  |
| C  | -2.59266 | -2.18049 | -0.06310 |
| H  | -3.29561 | -3.01632 | -0.09117 |
| Br | -0.48706 | 1.87522  | -0.53395 |

NOBe+IPha3

|    |          |          |          |
|----|----------|----------|----------|
| C  | -2.80261 | -1.51310 | -0.71426 |
| C  | -1.62617 | -1.65474 | -0.06497 |
| H  | -3.25219 | -2.32360 | -1.30081 |
| H  | -1.02284 | -2.56422 | -0.03080 |
| Be | -2.32021 | 0.56542  | -0.23432 |
| C  | -1.21097 | -0.87098 | 2.17784  |
| H  | -0.27288 | -1.40428 | 2.41963  |
| H  | -1.29780 | 0.02622  | 2.80775  |
| H  | -2.06631 | -1.53046 | 2.38094  |
| N  | -1.24624 | -0.51184 | 0.75667  |
| O  | -3.45581 | -0.34878 | -0.69485 |
| C  | -0.19558 | 0.43212  | 0.26825  |
| C  | -0.80474 | 1.13412  | -0.92206 |
| C  | 0.27156  | 1.38648  | 1.30005  |
| H  | -0.83722 | 0.50178  | -1.82658 |
| H  | 0.59789  | 0.99074  | 2.26420  |
| C  | -0.40648 | 2.50575  | -1.20195 |
| C  | 0.47549  | 2.69735  | 1.02249  |
| H  | -0.63920 | 2.91008  | -2.19213 |
| H  | 0.90170  | 3.33232  | 1.80577  |
| C  | 0.19286  | 3.27870  | -0.26631 |
| H  | 0.44892  | 4.32215  | -0.46251 |
| I  | 1.69303  | -0.84007 | -0.26907 |

NOBe+IPhb3

|    |          |          |          |
|----|----------|----------|----------|
| C  | -2.74970 | -0.31758 | 0.92235  |
| C  | -1.56287 | -0.43016 | 1.55978  |
| H  | -3.62218 | -0.92027 | 1.19995  |
| H  | -1.28703 | -1.03337 | 2.42221  |
| Be | -1.41459 | 1.25460  | -0.20767 |
| C  | -4.07339 | 0.69478  | -0.84755 |
| H  | -4.93945 | 0.96023  | -0.21028 |

|   |          |          |          |
|---|----------|----------|----------|
| H | -3.98412 | 1.47392  | -1.62141 |
| H | -4.30847 | -0.25857 | -1.35997 |
| O | -0.67254 | 0.54872  | 1.11882  |
| N | -2.84631 | 0.61819  | -0.09097 |
| C | 0.60500  | 0.45676  | 0.23410  |
| C | 0.19805  | 1.34467  | -0.92963 |
| C | 1.72385  | 0.93617  | 1.06785  |
| H | 0.08600  | 0.81201  | -1.88800 |
| H | 2.07600  | 0.28691  | 1.87384  |
| C | 0.91092  | 2.61580  | -1.07886 |
| C | 2.27822  | 2.15026  | 0.85636  |
| H | 0.63761  | 3.23729  | -1.93920 |
| H | 3.08873  | 2.47477  | 1.51741  |
| C | 1.86896  | 3.02848  | -0.21961 |
| H | 2.36523  | 3.99362  | -0.34484 |
| I | 0.86144  | -1.65353 | -0.31173 |

NSBe+FPhab1

|    |          |          |          |
|----|----------|----------|----------|
| C  | 2.61347  | -1.49246 | -0.00772 |
| C  | 2.98463  | -0.19211 | 0.05681  |
| H  | 3.32640  | -2.31947 | -0.00513 |
| H  | 4.03786  | 0.11168  | 0.11518  |
| Be | 0.61577  | 0.08420  | -0.03281 |
| C  | 2.42631  | 2.16720  | 0.13504  |
| H  | 2.98893  | 2.37992  | 1.06603  |
| H  | 3.06972  | 2.46386  | -0.71772 |
| H  | 1.54802  | 2.83771  | 0.12873  |
| N  | 2.00570  | 0.79246  | 0.05273  |
| S  | 0.88317  | -1.85570 | -0.08802 |
| C  | -1.97304 | 0.19473  | 0.92419  |
| C  | -2.70685 | -0.61300 | 0.07198  |
| C  | -1.08231 | 1.16631  | 0.43641  |
| H  | -3.37442 | -1.36805 | 0.49206  |
| H  | -0.59984 | 1.85009  | 1.14071  |
| C  | -2.56497 | -0.44392 | -1.30952 |
| C  | -0.95657 | 1.32261  | -0.95850 |
| H  | -3.13866 | -1.08352 | -1.98503 |
| H  | -0.30873 | 2.10802  | -1.35672 |
| C  | -1.69493 | 0.50833  | -1.82870 |
| H  | -1.58059 | 0.62560  | -2.90803 |
| F  | -2.09742 | 0.05502  | 2.23117  |

NSBe+ClPhab1

|   |          |         |         |
|---|----------|---------|---------|
| C | -2.81748 | 0.68135 | 1.28269 |
|---|----------|---------|---------|

|    |          |          |          |
|----|----------|----------|----------|
| C  | -3.10735 | -0.28967 | 0.38502  |
| H  | -3.53615 | 1.05310  | 2.01596  |
| H  | -4.09354 | -0.76938 | 0.34092  |
| Be | -0.83963 | 0.13670  | -0.22136 |
| C  | -2.45742 | -1.74276 | -1.44507 |
| H  | -2.69186 | -2.70044 | -0.93831 |
| H  | -3.32633 | -1.48114 | -2.08139 |
| H  | -1.60640 | -1.93362 | -2.12334 |
| N  | -2.12905 | -0.69507 | -0.51333 |
| S  | -1.19046 | 1.37649  | 1.25361  |
| C  | 1.91940  | -0.43901 | 0.09051  |
| C  | 2.48348  | 0.82284  | 0.21021  |
| C  | 0.97387  | -0.71129 | -0.91785 |
| H  | 3.20587  | 1.01975  | 1.00471  |
| H  | 0.60073  | -1.73028 | -1.04767 |
| C  | 2.10686  | 1.83618  | -0.68062 |
| C  | 0.60751  | 0.31481  | -1.80736 |
| H  | 2.54673  | 2.83077  | -0.57255 |
| H  | -0.08015 | 0.09635  | -2.62959 |
| C  | 1.17439  | 1.59437  | -1.67970 |
| H  | 0.87485  | 2.38984  | -2.36512 |
| Cl | 2.35976  | -1.69888 | 1.18766  |

NOBe+BrPhab1

|    |          |          |          |
|----|----------|----------|----------|
| C  | 3.07887  | -0.57132 | -1.51875 |
| C  | 3.33653  | -0.96517 | -0.24932 |
| H  | 3.72925  | -0.80890 | -2.36311 |
| H  | 4.22682  | -1.55233 | 0.01068  |
| Be | 1.28527  | 0.19900  | 0.11181  |
| C  | 2.74471  | -1.04942 | 2.10151  |
| H  | 2.81489  | -2.15244 | 2.18431  |
| H  | 3.69725  | -0.62649 | 2.47966  |
| H  | 1.94793  | -0.72333 | 2.79397  |
| N  | 2.44808  | -0.61896 | 0.75987  |
| S  | 1.60836  | 0.36817  | -1.81199 |
| C  | -1.53857 | 0.32227  | 0.22400  |
| C  | -1.83083 | 1.48446  | -0.47559 |
| C  | -0.52198 | 0.30957  | 1.20038  |
| H  | -2.61286 | 1.48150  | -1.23762 |
| H  | -0.35327 | -0.58835 | 1.80105  |
| C  | -1.10779 | 2.65509  | -0.20914 |
| C  | 0.19500  | 1.49224  | 1.45822  |
| H  | -1.33761 | 3.56345  | -0.77180 |
| H  | 0.94462  | 1.50691  | 2.25434  |
| C  | -0.09904 | 2.66558  | 0.74312  |

|             |          |          |          |
|-------------|----------|----------|----------|
| H           | 0.46843  | 3.57744  | 0.94071  |
| Br          | -2.48795 | -1.25975 | -0.12895 |
| NSBe+IPhab1 |          |          |          |
| C           | 3.25998  | -1.06008 | -1.50701 |
| C           | 3.52472  | -1.35315 | -0.21207 |
| H           | 3.82490  | -1.47662 | -2.34343 |
| H           | 4.33393  | -2.03521 | 0.07899  |
| Be          | 1.68396  | 0.13459  | 0.09336  |
| C           | 3.04379  | -1.11418 | 2.15330  |
| H           | 2.91055  | -2.19535 | 2.35777  |
| H           | 4.08121  | -0.84677 | 2.43824  |
| H           | 2.36784  | -0.56952 | 2.83660  |
| N           | 2.74901  | -0.77607 | 0.78482  |
| S           | 1.92384  | 0.04865  | -1.84831 |
| C           | -1.07093 | 0.75902  | 0.22815  |
| C           | -1.16426 | 1.89641  | -0.56348 |
| C           | -0.04846 | 0.64874  | 1.19398  |
| H           | -1.94919 | 1.97987  | -1.31850 |
| H           | -0.01723 | -0.20933 | 1.87156  |
| C           | -0.23776 | 2.93696  | -0.40502 |
| C           | 0.87405  | 1.70041  | 1.34401  |
| H           | -0.31482 | 3.82093  | -1.04320 |
| H           | 1.63297  | 1.64665  | 2.12960  |
| C           | 0.77816  | 2.84475  | 0.53425  |
| H           | 1.50598  | 3.65105  | 0.64750  |
| I           | -2.43193 | -0.81515 | -0.01030 |

NSBe+FPha3

|    |          |          |          |
|----|----------|----------|----------|
| C  | 2.75600  | -0.62901 | -0.05247 |
| C  | 1.63279  | -1.35273 | 0.06610  |
| H  | 3.71200  | -1.11498 | -0.27318 |
| H  | 1.59025  | -2.44218 | -0.03391 |
| Be | 0.80088  | 1.06359  | 0.24408  |
| C  | -0.08802 | -1.03494 | 1.74272  |
| H  | -0.45624 | -2.07520 | 1.73279  |
| H  | 0.72607  | -0.94300 | 2.47887  |
| H  | -0.91625 | -0.37118 | 2.03649  |
| N  | 0.43726  | -0.63740 | 0.42837  |
| S  | 2.77819  | 1.13484  | 0.12300  |
| C  | -0.65736 | -0.33831 | -0.64393 |
| C  | -0.77208 | 1.19503  | -0.53226 |
| C  | -1.91613 | -1.10459 | -0.43329 |
| H  | -0.60153 | 1.68460  | -1.50950 |
| H  | -1.92267 | -2.14820 | -0.76274 |
| C  | -1.99274 | 1.69376  | 0.11718  |

|   |          |          |          |
|---|----------|----------|----------|
| C | -2.98990 | -0.51968 | 0.13203  |
| H | -2.07070 | 2.77677  | 0.26598  |
| H | -3.89785 | -1.11105 | 0.29105  |
| C | -3.01327 | 0.88981  | 0.49306  |
| H | -3.90058 | 1.29901  | 0.98231  |
| F | -0.08152 | -0.70006 | -1.83176 |

NSBe+ClPha3

|    |          |          |          |
|----|----------|----------|----------|
| C  | 2.77230  | -0.26677 | 0.51578  |
| C  | 1.65180  | -0.74854 | 1.07463  |
| H  | 3.74108  | -0.73638 | 0.71520  |
| H  | 1.62450  | -1.60035 | 1.76163  |
| Be | 0.79101  | 1.09811  | -0.47836 |
| C  | -0.08235 | 0.62568  | 2.04137  |
| H  | -0.44830 | -0.12229 | 2.76501  |
| H  | 0.73942  | 1.20148  | 2.49546  |
| H  | -0.90743 | 1.31009  | 1.79102  |
| N  | 0.43904  | -0.01487 | 0.82065  |
| S  | 2.76957  | 1.12527  | -0.58021 |
| C  | -0.68033 | -0.52527 | -0.14674 |
| C  | -0.78924 | 0.67435  | -1.12225 |
| C  | -1.93746 | -0.89730 | 0.56691  |
| H  | -0.63428 | 0.38796  | -2.17749 |
| H  | -1.96293 | -1.86573 | 1.07454  |
| C  | -1.99466 | 1.50356  | -0.97480 |
| C  | -2.99620 | -0.06425 | 0.58011  |
| H  | -2.05849 | 2.39440  | -1.61042 |
| H  | -3.89526 | -0.36262 | 1.12976  |
| C  | -3.01309 | 1.19856  | -0.14067 |
| H  | -3.88873 | 1.84730  | -0.06011 |
| Cl | -0.02615 | -1.98510 | -0.98814 |

NSBe+ClPhb3

|    |         |          |          |
|----|---------|----------|----------|
| C  | 2.35472 | -0.93238 | 0.61823  |
| C  | 1.33619 | -1.82076 | 0.81248  |
| Be | 0.92763 | 0.03580  | -1.08650 |
| N  | 2.32921 | 0.01324  | -0.35790 |
| C  | 3.43902 | 0.94114  | -0.45111 |
| H  | 3.23273 | 1.68840  | -1.23353 |
| H  | 3.59544 | 1.48780  | 0.49772  |
| H  | 4.38423 | 0.43090  | -0.71633 |
| H  | 3.22980 | -0.96123 | 1.28363  |
| H  | 1.34366 | -2.57994 | 1.59490  |
| S  | 0.02193 | -1.80568 | -0.34951 |



|    |          |          |          |
|----|----------|----------|----------|
| C  | -1.05389 | -0.19768 | -0.04468 |
| C  | -0.65560 | 0.75231  | -1.16581 |
| C  | -0.84283 | 0.35922  | 1.31288  |
| H  | -1.13916 | 0.47633  | -2.11603 |
| H  | -0.89994 | -0.33409 | 2.15602  |
| C  | -0.70082 | 2.18748  | -0.85552 |
| C  | -0.68685 | 1.68680  | 1.50674  |
| H  | -0.68834 | 2.88886  | -1.69696 |
| H  | -0.58882 | 2.05784  | 2.53234  |
| C  | -0.67649 | 2.64389  | 0.41636  |
| H  | -0.64270 | 3.71343  | 0.63692  |
| Cl | -2.78079 | -0.81961 | -0.19957 |

NSBe+BrPha3

|    |          |          |          |
|----|----------|----------|----------|
| C  | -2.79028 | -0.25209 | 0.60226  |
| C  | -1.67422 | 0.02990  | 1.29179  |
| H  | -3.76051 | 0.13231  | 0.93366  |
| H  | -1.65418 | 0.62077  | 2.21315  |
| Be | -0.80064 | -1.23734 | -0.75545 |
| C  | 0.03928  | -1.59192 | 1.79308  |
| H  | 0.39887  | -1.11657 | 2.72133  |
| H  | -0.79293 | -2.27337 | 2.02993  |
| H  | 0.86437  | -2.16970 | 1.34924  |
| N  | -0.45850 | -0.59023 | 0.83177  |
| S  | -2.77808 | -1.22891 | -0.87521 |
| C  | 0.68490  | 0.17813  | 0.08981  |
| C  | 0.78199  | -0.63706 | -1.22499 |
| C  | 1.93969  | 0.26010  | 0.89390  |
| H  | 0.61673  | -0.03134 | -2.13321 |
| H  | 1.97493  | 0.98746  | 1.70992  |
| C  | 1.98102  | -1.47498 | -1.37032 |
| C  | 2.99155  | -0.53730 | 0.62185  |
| H  | 2.03534  | -2.09966 | -2.26957 |
| H  | 3.88752  | -0.45664 | 1.24649  |
| C  | 3.00326  | -1.47658 | -0.48711 |
| H  | 3.87424  | -2.11992 | -0.63328 |
| Br | 0.04782  | 2.00803  | -0.26362 |

NSBe+BrPhb3

|    |         |          |          |
|----|---------|----------|----------|
| C  | 2.69337 | -1.16891 | 0.60314  |
| C  | 1.56352 | -1.90477 | 0.81803  |
| Be | 1.38753 | 0.00750  | -1.06420 |
| N  | 2.78532 | -0.22498 | -0.37121 |
| C  | 4.02457 | 0.51595  | -0.50295 |

|    |          |          |          |
|----|----------|----------|----------|
| H  | 3.91663  | 1.28250  | -1.28659 |
| H  | 4.29246  | 1.03608  | 0.43580  |
| H  | 4.86887  | -0.13863 | -0.79013 |
| H  | 3.56842  | -1.32472 | 1.25055  |
| H  | 1.48096  | -2.65801 | 1.60204  |
| S  | 0.24191  | -1.71384 | -0.32161 |
| C  | -0.59076 | 0.00492  | -0.00509 |
| C  | -0.11188 | 0.89242  | -1.14145 |
| C  | -0.28243 | 0.54773  | 1.33740  |
| H  | -0.61036 | 0.64315  | -2.09176 |
| H  | -0.35836 | -0.13096 | 2.19103  |
| C  | -0.04372 | 2.33138  | -0.85738 |
| C  | -0.01641 | 1.86156  | 1.51094  |
| H  | 0.00537  | 3.01823  | -1.70918 |
| H  | 0.14803  | 2.23335  | 2.52754  |
| C  | 0.03148  | 2.80178  | 0.40789  |
| H  | 0.14511  | 3.86899  | 0.61234  |
| Br | -2.57090 | -0.40446 | -0.10754 |

NSBe+IPha3

|    |          |          |          |
|----|----------|----------|----------|
| C  | -2.82204 | -0.53636 | 0.58405  |
| C  | -1.70757 | -0.32105 | 1.30012  |
| H  | -3.78439 | -0.13739 | 0.92105  |
| H  | -1.68459 | 0.21859  | 2.25245  |
| Be | -0.84251 | -1.51704 | -0.79068 |
| C  | -0.05443 | -2.01508 | 1.74756  |
| H  | 0.30763  | -1.59573 | 2.70143  |
| H  | -0.91392 | -2.67594 | 1.94187  |
| H  | 0.75643  | -2.60089 | 1.28852  |
| N  | -0.50315 | -0.95250 | 0.82660  |
| S  | -2.81739 | -1.44247 | -0.93694 |
| C  | 0.67768  | -0.19379 | 0.13564  |
| C  | 0.75292  | -0.92832 | -1.22686 |
| C  | 1.92630  | -0.22429 | 0.95145  |
| H  | 0.58022  | -0.27818 | -2.10204 |
| H  | 1.97843  | 0.41508  | 1.83766  |
| C  | 1.93555  | -1.77321 | -1.44268 |
| C  | 2.96130  | -1.02144 | 0.61721  |
| H  | 1.97454  | -2.32641 | -2.38830 |
| H  | 3.85083  | -1.02030 | 1.25628  |
| C  | 2.96015  | -1.86233 | -0.56688 |
| H  | 3.81921  | -2.50722 | -0.76692 |
| I  | 0.10013  | 1.91658  | -0.13532 |

NSBe+IPhb3

|    |          |          |          |
|----|----------|----------|----------|
| C  | 3.05281  | -1.26830 | 0.59299  |
| C  | 1.88761  | -1.94996 | 0.79690  |
| Be | 1.80900  | 0.00347  | -1.05148 |
| N  | 3.19183  | -0.31290 | -0.36481 |
| C  | 4.47106  | 0.35799  | -0.49315 |
| H  | 4.40689  | 1.13240  | -1.27370 |
| H  | 4.76763  | 0.85799  | 0.44788  |
| H  | 5.27645  | -0.34243 | -0.78304 |
| H  | 3.91940  | -1.48013 | 1.23590  |
| H  | 1.76731  | -2.71053 | 1.56896  |
| S  | 0.57509  | -1.67632 | -0.33729 |
| C  | -0.15098 | 0.07158  | -0.00280 |
| C  | 0.33742  | 0.94040  | -1.14280 |
| C  | 0.20002  | 0.60176  | 1.32882  |
| H  | -0.14769 | 0.69213  | -2.09997 |
| H  | 0.14531  | -0.07754 | 2.18368  |
| C  | 0.42173  | 2.37836  | -0.86854 |
| C  | 0.48509  | 1.91387  | 1.49959  |
| H  | 0.46512  | 3.06275  | -1.72236 |
| H  | 0.68149  | 2.28188  | 2.51164  |
| C  | 0.51311  | 2.85153  | 0.39611  |
| H  | 0.63464  | 3.91875  | 0.59603  |
| I  | -2.41517 | -0.25889 | -0.05946 |

CAAC2Be+FPhc1

|   |          |          |          |
|---|----------|----------|----------|
| C | 0.68549  | -0.20224 | 1.42082  |
| C | 0.33976  | -0.55412 | 2.86498  |
| C | 1.09658  | -1.83324 | 3.12002  |
| C | 1.86957  | -2.07123 | 2.06170  |
| N | 1.63672  | -1.07512 | 1.06578  |
| C | 0.93846  | 0.52875  | 3.80581  |
| C | -1.17045 | -0.64570 | 3.10338  |
| C | 2.56570  | -0.96342 | -0.04196 |
| C | 3.63244  | -0.04414 | 0.08554  |
| C | 4.52135  | 0.07410  | -0.98320 |
| C | 4.41297  | -0.73588 | -2.10898 |
| C | 3.42304  | -1.70474 | -2.16470 |
| C | 2.48227  | -1.83778 | -1.13669 |
| C | 3.91789  | 0.69590  | 1.38220  |
| C | 1.47080  | -2.96531 | -1.20360 |
| C | 0.71161  | -3.02108 | -2.53274 |
| C | 2.15621  | -4.31012 | -0.92069 |
| C | 4.60452  | 2.05090  | 1.19571  |
| C | 4.75455  | -0.19282 | 2.31718  |
| H | 4.58985  | 2.60535  | 2.14986  |

|    |          |          |          |
|----|----------|----------|----------|
| H  | 4.09393  | 2.66036  | 0.43582  |
| H  | 5.66431  | 1.93634  | 0.90568  |
| H  | 2.95495  | 0.88629  | 1.87013  |
| H  | 4.25872  | -1.15258 | 2.53542  |
| H  | 4.92880  | 0.32198  | 3.27874  |
| H  | 5.73763  | -0.41265 | 1.86377  |
| H  | 5.33081  | 0.80447  | -0.92697 |
| H  | 5.125703 | -0.62871 | -2.93139 |
| H  | 3.373184 | -2.37322 | -3.02836 |
| H  | 0.735292 | -2.78883 | -0.40804 |
| H  | 1.385909 | -3.22664 | -3.38216 |
| H  | 0.180488 | -2.07791 | -2.73825 |
| H  | -0.03595 | -3.83263 | -2.5097  |
| H  | 1.419251 | -5.13235 | -0.92147 |
| H  | 2.667139 | -4.31145 | 0.05683  |
| H  | 2.913789 | -4.53447 | -1.69241 |
| H  | -1.62306 | -1.46585 | 2.52805  |
| H  | -1.65294 | 0.293665 | 2.786469 |
| H  | -1.3769  | -0.8186  | 4.174188 |
| H  | 0.458066 | 1.503596 | 3.640293 |
| H  | 2.024418 | 0.642442 | 3.66175  |
| H  | 0.763652 | 0.225735 | 4.852453 |
| H  | 2.605054 | -2.85137 | 1.867093 |
| H  | 1.073844 | -2.40105 | 4.050882 |
| Be | 0.028402 | 1.132345 | 0.380711 |
| C  | -0.82492 | 0.610923 | -1.08026 |
| C  | -0.54679 | 0.973644 | -2.5356  |
| C  | -1.44306 | 0.047135 | -3.31781 |
| C  | -2.23066 | -0.59357 | -2.45577 |
| N  | -1.86871 | -0.24133 | -1.1237  |
| C  | -1.05901 | 2.411992 | -2.81458 |
| C  | 0.941393 | 0.889021 | -2.89133 |
| C  | -2.74939 | -0.64532 | -0.05153 |
| C  | -3.62262 | 0.318174 | 0.50898  |
| C  | -4.51492 | -0.11045 | 1.493994 |
| C  | -4.60005 | -1.44636 | 1.87444  |
| C  | -3.7855  | -2.38451 | 1.262696 |
| C  | -2.84506 | -2.004   | 0.298109 |
| C  | -3.68556 | 1.751446 | 0.002187 |
| C  | -1.98994 | -3.08272 | -0.33922 |
| C  | -1.22955 | -3.90371 | 0.709028 |
| C  | -2.82718 | -4.00321 | -1.23727 |
| C  | -4.29662 | 2.731219 | 1.005211 |
| C  | -4.47527 | 1.81263  | -1.31528 |
| H  | -4.17432 | 3.760331 | 0.629616 |
| H  | -3.8017  | 2.668242 | 1.988971 |

|   |          |          |          |
|---|----------|----------|----------|
| H | -5.37928 | 2.562615 | 1.147061 |
| H | -2.65338 | 2.088154 | -0.18    |
| H | -4.04355 | 1.165919 | -2.09597 |
| H | -4.48365 | 2.845522 | -1.70525 |
| H | -5.52277 | 1.498484 | -1.15472 |
| H | -5.18698 | 0.61084  | 1.961409 |
| H | -5.32117 | -1.7542  | 2.636764 |
| H | -3.87427 | -3.43802 | 1.541542 |
| H | -1.24919 | -2.57989 | -0.97425 |
| H | -1.91758 | -4.47129 | 1.359374 |
| H | -0.60626 | -3.26259 | 1.354388 |
| H | -0.56899 | -4.63757 | 0.216672 |
| H | -2.18212 | -4.74584 | -1.73917 |
| H | -3.36453 | -3.43861 | -2.01733 |
| H | -3.58044 | -4.55569 | -0.64791 |
| H | 1.3309   | -0.13116 | -2.76584 |
| H | 1.525171 | 1.553743 | -2.23482 |
| H | 1.098113 | 1.194844 | -3.94112 |
| H | -1.02319 | 2.599065 | -3.9023  |
| H | -0.42098 | 3.143957 | -2.30097 |
| H | -2.09601 | 2.553519 | -2.47158 |
| H | -3.06572 | -1.27529 | -2.61433 |
| H | -1.50771 | 0.013248 | -4.40598 |
| C | 0.515851 | 4.546973 | -0.81458 |
| C | -0.75506 | 4.725044 | -0.12759 |
| C | -1.12493 | 3.863491 | 0.849856 |
| C | -0.33593 | 2.694485 | 1.233488 |
| C | 1.057049 | 2.598495 | 0.643052 |
| C | 1.342877 | 3.565989 | -0.38836 |
| H | 0.829435 | 5.21325  | -1.62185 |
| H | -1.38001 | 5.586624 | -0.38227 |
| H | -2.03124 | 4.076154 | 1.424774 |
| H | -0.40976 | 2.487973 | 2.309296 |
| H | 1.89674  | 2.467005 | 1.33706  |
| F | 2.567933 | 3.467399 | -0.96083 |

CAAC2Be+ClPhc1

|   |          |          |         |
|---|----------|----------|---------|
| C | 0.52812  | -0.45979 | 1.44609 |
| C | 0.02681  | -0.85509 | 2.83109 |
| C | 0.51325  | -2.27146 | 3.00536 |
| C | 1.31194  | -2.55876 | 1.97915 |
| N | 1.33497  | -1.45339 | 1.07367 |
| C | 0.78580  | 0.00954  | 3.88006 |
| C | -1.47777 | -0.65667 | 3.01682 |
| C | 2.32410  | -1.41529 | 0.01550 |

|    |          |          |          |
|----|----------|----------|----------|
| C  | 3.51549  | -0.69230 | 0.25411  |
| C  | 4.44916  | -0.62746 | -0.78009 |
| C  | 4.25050  | -1.30556 | -1.97878 |
| C  | 3.12373  | -2.09607 | -2.14547 |
| C  | 2.14018  | -2.17010 | -1.15274 |
| C  | 3.85316  | -0.11096 | 1.62007  |
| C  | 0.97917  | -3.13282 | -1.32509 |
| C  | 0.25421  | -2.99501 | -2.66704 |
| C  | 1.46735  | -4.57625 | -1.12904 |
| C  | 4.84022  | 1.05767  | 1.58609  |
| C  | 4.39488  | -1.21233 | 2.54662  |
| H  | 4.88458  | 1.52981  | 2.58248  |
| H  | 4.53826  | 1.82453  | 0.85691  |
| H  | 5.86387  | 0.72179  | 1.34126  |
| H  | 2.92121  | 0.27188  | 2.05561  |
| H  | 3.67826  | -2.03707 | 2.68687  |
| H  | 4.62027  | -0.79277 | 3.54307  |
| H  | 5.32788  | -1.63776 | 2.13572  |
| H  | 5.36106  | -0.04387 | -0.64362 |
| H  | 4.997138 | -1.23797 | -2.77475 |
| H  | 2.999835 | -2.66585 | -3.07027 |
| H  | 0.250924 | -2.91378 | -0.53274 |
| H  | 0.925321 | -3.19848 | -3.51939 |
| H  | -0.17366 | -1.98894 | -2.80174 |
| H  | -0.57317 | -3.72346 | -2.72497 |
| H  | 0.624078 | -5.28726 | -1.18133 |
| H  | 1.967182 | -4.71113 | -0.15511 |
| H  | 2.193128 | -4.85389 | -1.91373 |
| H  | -2.05848 | -1.3213  | 2.362252 |
| H  | -1.7458  | 0.383552 | 2.769908 |
| H  | -1.76145 | -0.86625 | 4.063019 |
| H  | 0.534315 | 1.073653 | 3.768296 |
| H  | 1.877486 | -0.1074  | 3.794686 |
| H  | 0.486182 | -0.31805 | 4.890244 |
| H  | 1.90838  | -3.44199 | 1.753218 |
| H  | 0.313975 | -2.90199 | 3.872569 |
| Be | 0.146907 | 1.032798 | 0.441305 |
| C  | -0.79147 | 0.710519 | -1.03722 |
| C  | -0.43261 | 1.108538 | -2.46771 |
| C  | -1.46647 | 0.410769 | -3.31271 |
| C  | -2.3578  | -0.15021 | -2.49866 |
| N  | -1.95711 | 0.043774 | -1.14495 |
| C  | -0.67248 | 2.630989 | -2.64684 |
| C  | 1.016312 | 0.77366  | -2.83803 |
| C  | -2.91232 | -0.29392 | -0.11626 |
| C  | -3.62801 | 0.74961  | 0.516727 |

|   |          |          |          |
|---|----------|----------|----------|
| C | -4.60846 | 0.391831 | 1.445226 |
| C | -4.92292 | -0.93914 | 1.702133 |
| C | -4.25269 | -1.94445 | 1.024179 |
| C | -3.23416 | -1.64397 | 0.112355 |
| C | -3.42938 | 2.21213  | 0.146569 |
| C | -2.53562 | -2.79107 | -0.59395 |
| C | -1.9557  | -3.8017  | 0.402918 |
| C | -3.46913 | -3.49434 | -1.58804 |
| C | -3.88553 | 3.186409 | 1.233337 |
| C | -4.16258 | 2.52965  | -1.16672 |
| H | -3.58652 | 4.210171 | 0.954739 |
| H | -3.42387 | 2.953468 | 2.207891 |
| H | -4.98335 | 3.190407 | 1.358152 |
| H | -2.35034 | 2.379124 | 0.00552  |
| H | -3.82755 | 1.891844 | -2.00066 |
| H | -3.98281 | 3.579851 | -1.4557  |
| H | -5.25215 | 2.387554 | -1.04656 |
| H | -5.16365 | 1.172412 | 1.967699 |
| H | -5.70605 | -1.18772 | 2.423839 |
| H | -4.51564 | -2.9892  | 1.211034 |
| H | -1.69893 | -2.36647 | -1.16359 |
| H | -2.75149 | -4.31711 | 0.968689 |
| H | -1.28508 | -3.31411 | 1.129859 |
| H | -1.37854 | -4.57793 | -0.12833 |
| H | -2.93019 | -4.29391 | -2.12653 |
| H | -3.8733  | -2.79462 | -2.33805 |
| H | -4.3268  | -3.95724 | -1.06842 |
| H | 1.201171 | -0.30938 | -2.81318 |
| H | 1.709487 | 1.249269 | -2.12681 |
| H | 1.239419 | 1.141908 | -3.85523 |
| H | -0.61331 | 2.878656 | -3.72127 |
| H | 0.093904 | 3.199371 | -2.10352 |
| H | -1.66143 | 2.938793 | -2.27139 |
| H | -3.29542 | -0.66583 | -2.70291 |
| H | -1.52097 | 0.46514  | -4.40053 |
| C | 1.086101 | 4.457769 | -0.52061 |
| C | -0.13242 | 4.734312 | 0.224998 |
| C | -0.57129 | 3.849028 | 1.151577 |
| C | 0.059484 | 2.558486 | 1.39708  |
| C | 1.401218 | 2.304928 | 0.710447 |
| C | 1.792378 | 3.33957  | -0.22931 |
| H | 1.450886 | 5.166029 | -1.26825 |
| H | -0.64123 | 5.690992 | 0.07237  |
| H | -1.41305 | 4.130724 | 1.792889 |
| H | 0.02161  | 2.291432 | 2.461845 |
| H | 2.233947 | 1.994089 | 1.353845 |

|    |          |          |         |
|----|----------|----------|---------|
| Cl | 3.338178 | 3.112835 | -1.0628 |
|----|----------|----------|---------|

CAAC2Be+BrPhc1

|   |          |          |          |
|---|----------|----------|----------|
| C | 0.11471  | -0.77199 | 1.48125  |
| C | -0.56701 | -1.08040 | 2.81025  |
| C | -0.51236 | -2.58395 | 2.90789  |
| C | 0.24351  | -3.03148 | 1.90695  |
| N | 0.63416  | -1.93144 | 1.08200  |
| C | 0.34214  | -0.53518 | 3.95155  |
| C | -1.95931 | -0.46277 | 2.94448  |
| C | 1.65567  | -2.11638 | 0.07227  |
| C | 2.97813  | -1.73431 | 0.39548  |
| C | 3.95015  | -1.87910 | -0.59455 |
| C | 3.64743  | -2.44498 | -1.82963 |
| C | 2.36611  | -2.91142 | -2.08040 |
| C | 1.34492  | -2.75775 | -1.13604 |
| C | 3.37550  | -1.30672 | 1.80211  |
| C | -0.01776 | -3.37016 | -1.40697 |
| C | -0.60817 | -2.98576 | -2.76712 |
| C | 0.06117  | -4.89887 | -1.27579 |
| C | 4.65278  | -0.46875 | 1.87527  |
| C | 3.51966  | -2.54035 | 2.70887  |
| H | 4.76613  | -0.06054 | 2.89414  |
| H | 4.62692  | 0.37742  | 1.17144  |
| H | 5.55319  | -1.07356 | 1.66517  |
| H | 2.56298  | -0.68346 | 2.19859  |
| H | 2.59244  | -3.13214 | 2.76989  |
| H | 3.78451  | -2.22989 | 3.73520  |
| H | 4.32128  | -3.20241 | 2.33547  |
| H | 4.97312  | -1.55560 | -0.39550 |
| H | 4.427282 | -2.54632 | -2.58941 |
| H | 2.150044 | -3.40094 | -3.03376 |
| H | -0.70494 | -3.00124 | -0.63363 |
| H | 0.029121 | -3.32554 | -3.60188 |
| H | -0.74372 | -1.89707 | -2.86437 |
| H | -1.59595 | -3.4609  | -2.89819 |
| H | -0.93638 | -5.35596 | -1.39983 |
| H | 0.459236 | -5.20726 | -0.29445 |
| H | 0.726179 | -5.32319 | -2.04878 |
| H | -2.66752 | -0.89836 | 2.225933 |
| H | -1.89929 | 0.620294 | 2.748906 |
| H | -2.35332 | -0.62888 | 3.962246 |
| H | 0.410138 | 0.561033 | 3.910557 |
| H | 1.358102 | -0.95724 | 3.903027 |
| H | -0.10064 | -0.82297 | 4.920276 |



|    |          |          |          |
|----|----------|----------|----------|
| H  | 0.586814 | -4.03372 | 1.653057 |
| H  | -0.93706 | -3.17659 | 3.718851 |
| Be | 0.195495 | 0.824352 | 0.561135 |
| C  | -0.73179 | 0.818362 | -0.97228 |
| C  | -0.1873  | 1.147051 | -2.35987 |
| C  | -1.31359 | 0.787002 | -3.29189 |
| C  | -2.37407 | 0.464008 | -2.55499 |
| N  | -2.02127 | 0.497019 | -1.17336 |
| C  | 0.001384 | 2.683763 | -2.47235 |
| C  | 1.138523 | 0.442626 | -2.66476 |
| C  | -3.09305 | 0.384444 | -0.21234 |
| C  | -3.54195 | 1.553272 | 0.445495 |
| C  | -4.63758 | 1.431975 | 1.303542 |
| C  | -5.30714 | 0.223444 | 1.468862 |
| C  | -4.88638 | -0.8954  | 0.768217 |
| C  | -3.77257 | -0.8396  | -0.07767 |
| C  | -2.93465 | 2.922319 | 0.176063 |
| C  | -3.35993 | -2.10045 | -0.81499 |
| C  | -3.12664 | -3.26899 | 0.149926 |
| C  | -4.38508 | -2.49035 | -1.888   |
| C  | -3.18945 | 3.935734 | 1.292704 |
| C  | -3.46078 | 3.484462 | -1.15438 |
| H  | -2.5977  | 4.845581 | 1.100785 |
| H  | -2.89055 | 3.53927  | 2.277705 |
| H  | -4.25038 | 4.239912 | 1.345892 |
| H  | -1.84301 | 2.796971 | 0.105356 |
| H  | -3.25112 | 2.817029 | -2.00579 |
| H  | -2.98458 | 4.457357 | -1.36738 |
| H  | -4.55402 | 3.639922 | -1.10514 |
| H  | -4.99816 | 2.309797 | 1.841796 |
| H  | -6.17054 | 0.163289 | 2.137489 |
| H  | -5.42616 | -1.83907 | 0.88538  |
| H  | -2.40822 | -1.89084 | -1.32077 |
| H  | -4.06144 | -3.57533 | 0.650914 |
| H  | -2.3936  | -3.00797 | 0.930766 |
| H  | -2.74649 | -4.14923 | -0.39641 |
| H  | -4.04688 | -3.38625 | -2.43784 |
| H  | -4.54245 | -1.68299 | -2.62212 |
| H  | -5.36452 | -2.72313 | -1.43384 |
| H  | 1.014755 | -0.64784 | -2.72413 |
| H  | 1.867152 | 0.656366 | -1.86702 |
| H  | 1.545674 | 0.800452 | -3.62702 |
| H  | 0.192217 | 2.94348  | -3.52825 |
| H  | 0.854886 | 3.006082 | -1.86191 |
| H  | -0.89214 | 3.232022 | -2.13351 |
| H  | -3.40153 | 0.230428 | -2.83128 |

|    |          |          |          |
|----|----------|----------|----------|
| H  | -1.27949 | 0.888897 | -4.37709 |
| C  | 1.951185 | 3.9876   | -0.13168 |
| C  | 0.805394 | 4.485302 | 0.61486  |
| C  | 0.155425 | 3.663592 | 1.473109 |
| C  | 0.457184 | 2.247291 | 1.622608 |
| C  | 1.719507 | 1.725816 | 0.91848  |
| C  | 2.3719   | 2.717814 | 0.07941  |
| H  | 2.492584 | 4.651992 | -0.80937 |
| H  | 0.538046 | 5.543131 | 0.530491 |
| H  | -0.60896 | 4.087397 | 2.133187 |
| H  | 0.346442 | 1.926541 | 2.667433 |
| H  | 2.43755  | 1.182735 | 1.546025 |
| Br | 3.989905 | 2.180511 | -0.80759 |

CAAC2Be+IPhc1

|   |          |          |          |
|---|----------|----------|----------|
| C | 0.31047  | 0.91962  | 1.49667  |
| C | 1.10996  | 1.13574  | 2.77949  |
| C | 1.33684  | 2.62544  | 2.82158  |
| C | 0.62808  | 3.17586  | 1.83812  |
| N | 0.00037  | 2.14344  | 1.07480  |
| C | 0.19030  | 0.79935  | 3.99001  |
| C | 2.37602  | 0.28173  | 2.86503  |
| C | -1.01061 | 2.48738  | 0.09797  |
| C | -2.36534 | 2.36433  | 0.48271  |
| C | -3.33495 | 2.65795  | -0.47612 |
| C | -2.98433 | 3.12646  | -1.73943 |
| C | -1.65082 | 3.34380  | -2.05182 |
| C | -0.63625 | 3.02866  | -1.14095 |
| C | -2.76980 | 2.05785  | 1.91866  |
| C | 0.80542  | 3.36458  | -1.48055 |
| C | 1.25851  | 2.84597  | -2.84891 |
| C | 1.02592  | 4.88246  | -1.39196 |
| C | -4.17774 | 1.48318  | 2.07702  |
| C | -2.63928 | 3.32289  | 2.78394  |
| H | -4.31920 | 1.13941  | 3.11581  |
| H | -4.34889 | 0.62446  | 1.41028  |
| H | -4.95528 | 2.24189  | 1.87599  |
| H | -2.07142 | 1.30279  | 2.30420  |
| H | -1.61984 | 3.74007  | 2.77758  |
| H | -2.89961 | 3.09567  | 3.83295  |
| H | -3.32925 | 4.10683  | 2.42388  |
| H | -4.39054 | 2.52964  | -0.23056 |
| H | -3.76294 | 3.349057 | -2.47411 |
| H | -1.38917 | 3.75996  | -3.02844 |
| H | 1.442326 | 2.887604 | -0.72317 |

|    |          |          |          |
|----|----------|----------|----------|
| H  | 0.67309  | 3.291459 | -3.67189 |
| H  | 1.172151 | 1.750546 | -2.92364 |
| H  | 2.315894 | 3.111867 | -3.02091 |
| H  | 2.087565 | 5.133763 | -1.56254 |
| H  | 0.733539 | 5.285256 | -0.40774 |
| H  | 0.426498 | 5.409715 | -2.15508 |
| H  | 3.111599 | 0.570302 | 2.101759 |
| H  | 2.116764 | -0.77754 | 2.705325 |
| H  | 2.845449 | 0.397511 | 3.857547 |
| H  | -0.03437 | -0.27573 | 4.024011 |
| H  | -0.75727 | 1.35979  | 3.957119 |
| H  | 0.717493 | 1.075168 | 4.919162 |
| H  | 0.463129 | 4.216205 | 1.560891 |
| H  | 1.904567 | 3.152283 | 3.5893   |
| Be | -0.10297 | -0.67231 | 0.651737 |
| C  | 0.751081 | -0.8813  | -0.92198 |
| C  | 0.088148 | -1.12068 | -2.27522 |
| C  | 1.215162 | -1.00141 | -3.26561 |
| C  | 2.351643 | -0.87227 | -2.5852  |
| N  | 2.064477 | -0.81357 | -1.18844 |
| C  | -0.39801 | -2.59385 | -2.33584 |
| C  | -1.08922 | -0.17835 | -2.54216 |
| C  | 3.185891 | -0.88326 | -0.28104 |
| C  | 3.440708 | -2.0999  | 0.39295  |
| C  | 4.583618 | -2.16683 | 1.193531 |
| C  | 5.47537  | -1.10281 | 1.287337 |
| C  | 5.23481  | 0.059071 | 0.571554 |
| C  | 4.087893 | 0.193774 | -0.21924 |
| C  | 2.572719 | -3.33485 | 0.199099 |
| C  | 3.881579 | 1.491981 | -0.97906 |
| C  | 3.904587 | 2.706922 | -0.04417 |
| C  | 4.917102 | 1.660232 | -2.09898 |
| C  | 2.706825 | -4.35954 | 1.326519 |
| C  | 2.895244 | -4.01051 | -1.14334 |
| H  | 1.93489  | -5.13694 | 1.204983 |
| H  | 2.564521 | -3.89645 | 2.317404 |
| H  | 3.689433 | -4.86488 | 1.314913 |
| H  | 1.520846 | -3.00886 | 0.190588 |
| H  | 2.764592 | -3.33048 | -2.0004  |
| H  | 2.228112 | -4.87606 | -1.29901 |
| H  | 3.938995 | -4.37418 | -1.15483 |
| H  | 4.800485 | -3.08487 | 1.741892 |
| H  | 6.369826 | -1.19114 | 1.910381 |
| H  | 5.94926  | 0.884774 | 0.62957  |
| H  | 2.888215 | 1.449545 | -1.44534 |
| H  | 4.896287 | 2.842852 | 0.421454 |

|   |          |          |          |
|---|----------|----------|----------|
| H | 3.161721 | 2.609705 | 0.764405 |
| H | 3.678978 | 3.629374 | -0.60649 |
| H | 4.717211 | 2.581266 | -2.67443 |
| H | 4.905401 | 0.811855 | -2.80308 |
| H | 5.938421 | 1.737061 | -1.68575 |
| H | -0.75825 | 0.863098 | -2.65657 |
| H | -1.7948  | -0.21714 | -1.69727 |
| H | -1.61638 | -0.47956 | -3.46439 |
| H | -0.69053 | -2.83042 | -3.37362 |
| H | -1.26273 | -2.7342  | -1.6753  |
| H | 0.389526 | -3.29867 | -2.02527 |
| H | 3.390221 | -0.84117 | -2.9123  |
| H | 1.108959 | -1.11257 | -4.34513 |
| C | -2.3329  | -3.56399 | 0.181893 |
| C | -1.24706 | -4.18143 | 0.929698 |
| C | -0.46991 | -3.4163  | 1.732702 |
| C | -0.556   | -1.96638 | 1.799112 |
| C | -1.74537 | -1.2962  | 1.07834  |
| C | -2.56411 | -2.23656 | 0.324479 |
| H | -2.98035 | -4.19017 | -0.437   |
| H | -1.13623 | -5.26993 | 0.901597 |
| H | 0.239937 | -3.9086  | 2.406531 |
| H | -0.38569 | -1.60581 | 2.822464 |
| H | -2.35462 | -0.61789 | 1.690227 |
| I | -4.31026 | -1.47416 | -0.64548 |

CAAC2Be+FPhc3

|   |          |          |          |
|---|----------|----------|----------|
| C | 1.35192  | -0.18662 | 1.40999  |
| C | 1.07945  | -0.63509 | 2.82837  |
| C | 2.26648  | -1.50979 | 3.14400  |
| C | 3.13302  | -1.41909 | 2.13471  |
| N | 2.56234  | -0.60520 | 1.10522  |
| C | 1.18335  | 0.62965  | 3.73025  |
| C | -0.30410 | -1.27145 | 3.00638  |
| C | 3.29258  | -0.23290 | -0.08279 |
| C | 3.67231  | 1.11899  | -0.24005 |
| C | 4.33611  | 1.45895  | -1.42084 |
| C | 4.64733  | 0.49977  | -2.37941 |
| C | 4.29721  | -0.82660 | -2.17660 |
| C | 3.59803  | -1.22168 | -1.03165 |
| C | 3.45646  | 2.15989  | 0.85473  |
| C | 3.20324  | -2.68124 | -0.86812 |
| C | 2.52438  | -3.23109 | -2.12774 |
| C | 4.41922  | -3.54143 | -0.49454 |
| C | 3.53701  | 3.60479  | 0.35941  |

|    |          |          |          |
|----|----------|----------|----------|
| C  | 4.45840  | 1.93435  | 1.99836  |
| H  | 3.27655  | 4.28999  | 1.18311  |
| H  | 2.82746  | 3.79240  | -0.46362 |
| H  | 4.55455  | 3.87397  | 0.02548  |
| H  | 2.43811  | 2.03377  | 1.25499  |
| H  | 4.37724  | 0.92448  | 2.43539  |
| H  | 4.28676  | 2.66495  | 2.80810  |
| H  | 5.49401  | 2.06275  | 1.63625  |
| H  | 4.62636  | 2.49512  | -1.59864 |
| H  | 5.171211 | 0.793578 | -3.29299 |
| H  | 4.552737 | -1.5699  | -2.93541 |
| H  | 2.46964  | -2.75096 | -0.04876 |
| H  | 3.222986 | -3.28054 | -2.98033 |
| H  | 1.668179 | -2.60403 | -2.42172 |
| H  | 2.158956 | -4.25661 | -1.94987 |
| H  | 4.114083 | -4.5881  | -0.32212 |
| H  | 4.92192  | -3.17822 | 0.417487 |
| H  | 5.166668 | -3.53463 | -1.30741 |
| H  | -0.4034  | -2.19996 | 2.42954  |
| H  | -1.09473 | -0.58294 | 2.662067 |
| H  | -0.47779 | -1.5012  | 4.071308 |
| H  | 0.355517 | 1.322006 | 3.520619 |
| H  | 2.13714  | 1.160969 | 3.578571 |
| H  | 1.121143 | 0.319515 | 4.786608 |
| H  | 4.13194  | -1.82937 | 1.995816 |
| H  | 2.416384 | -2.04382 | 4.082672 |
| Be | 0.242096 | 0.78842  | 0.462277 |
| C  | -1.08605 | 0.731276 | -0.69779 |
| C  | -0.52758 | 1.078447 | -2.13082 |
| C  | -1.77156 | 0.887649 | -2.98986 |
| C  | -2.60258 | 0.066004 | -2.33083 |
| N  | -2.16262 | -0.22037 | -1.04504 |
| C  | 0.17664  | 2.425786 | -2.31251 |
| C  | 0.485009 | -0.00665 | -2.55719 |
| C  | -2.84889 | -1.09983 | -0.16639 |
| C  | -4.16428 | -0.81722 | 0.272074 |
| C  | -4.77956 | -1.69162 | 1.17386  |
| C  | -4.12925 | -2.82394 | 1.644017 |
| C  | -2.86316 | -3.13428 | 1.158038 |
| C  | -2.22211 | -2.30782 | 0.231414 |
| C  | -4.96182 | 0.373782 | -0.23623 |
| C  | -0.94696 | -2.77644 | -0.45917 |
| C  | -0.22099 | -3.92848 | 0.242013 |
| C  | -1.29501 | -3.21546 | -1.89248 |
| C  | -5.53008 | 1.24925  | 0.885887 |
| C  | -6.08143 | -0.09412 | -1.17806 |

|   |          |          |          |
|---|----------|----------|----------|
| H | -6.01664 | 2.142798 | 0.455396 |
| H | -4.72738 | 1.586223 | 1.557947 |
| H | -6.29224 | 0.714128 | 1.480676 |
| H | -4.28073 | 1.003539 | -0.8216  |
| H | -5.68902 | -0.7127  | -2.00359 |
| H | -6.60621 | 0.772393 | -1.61864 |
| H | -6.82813 | -0.70254 | -0.6363  |
| H | -5.79259 | -1.47267 | 1.524786 |
| H | -4.61929 | -3.48356 | 2.366374 |
| H | -2.38308 | -4.05667 | 1.49277  |
| H | -0.25425 | -1.91885 | -0.51386 |
| H | -0.82507 | -4.85262 | 0.243783 |
| H | 0.045725 | -3.69929 | 1.28723  |
| H | 0.712589 | -4.16194 | -0.2937  |
| H | -0.39366 | -3.54843 | -2.43552 |
| H | -1.75658 | -2.39972 | -2.46896 |
| H | -2.00697 | -4.05993 | -1.86344 |
| H | 0.062718 | -1.01248 | -2.41758 |
| H | 1.421218 | 0.068925 | -1.97304 |
| H | 0.746859 | 0.106139 | -3.62501 |
| H | 0.558347 | 2.493696 | -3.3474  |
| H | 1.043628 | 2.522856 | -1.63402 |
| H | -0.48663 | 3.281235 | -2.14129 |
| H | -3.51721 | -0.40559 | -2.69837 |
| H | -1.88006 | 1.22411  | -4.02185 |
| C | -2.39992 | 3.069713 | -0.48068 |
| C | -1.95846 | 4.341476 | -0.45973 |
| C | -0.69798 | 4.725458 | 0.168773 |
| C | 0.032256 | 3.806603 | 0.835677 |
| C | -0.35864 | 2.392967 | 0.918606 |
| C | -1.61902 | 1.955816 | 0.146039 |
| H | -3.35326 | 2.819072 | -0.95377 |
| H | -2.55942 | 5.125389 | -0.93364 |
| H | -0.38383 | 5.772736 | 0.129028 |
| H | 0.92100  | 4.125266 | 1.393724 |
| H | -0.5524  | 2.166094 | 1.98811  |
| F | -2.47483 | 1.358658 | 1.118823 |

CAAC2Be+ClPhc3

|   |         |          |         |
|---|---------|----------|---------|
| C | 1.42728 | -0.21308 | 1.37137 |
| C | 1.12164 | -0.62837 | 2.79633 |
| C | 2.34074 | -1.42132 | 3.19053 |
| C | 3.21927 | -1.37292 | 2.19032 |
| N | 2.64783 | -0.62943 | 1.10932 |
| C | 1.04476 | 0.65351  | 3.66773 |

|    |          |          |          |
|----|----------|----------|----------|
| C  | -0.19818 | -1.40405 | 2.91713  |
| C  | 3.40744  | -0.32400 | -0.07989 |
| C  | 3.90335  | 0.98782  | -0.23979 |
| C  | 4.63989  | 1.25036  | -1.39742 |
| C  | 4.89360  | 0.25450  | -2.33512 |
| C  | 4.40430  | -1.02924 | -2.14127 |
| C  | 3.63871  | -1.34653 | -1.01503 |
| C  | 3.69850  | 2.06963  | 0.81635  |
| C  | 3.08979  | -2.75551 | -0.84735 |
| C  | 2.48148  | -3.29419 | -2.14741 |
| C  | 4.17014  | -3.71794 | -0.33204 |
| C  | 3.89753  | 3.48885  | 0.28078  |
| C  | 4.61591  | 1.83353  | 2.02630  |
| H  | 3.61676  | 4.21870  | 1.05833  |
| H  | 3.26889  | 3.68336  | -0.60402 |
| H  | 4.95202  | 3.68728  | 0.01962  |
| H  | 2.65121  | 2.01025  | 1.15522  |
| H  | 4.44817  | 0.85213  | 2.49950  |
| H  | 4.44096  | 2.60691  | 2.79453  |
| H  | 5.67715  | 1.88734  | 1.72445  |
| H  | 5.03195  | 2.25268  | -1.57460 |
| H  | 5.476105 | 0.487308 | -3.23075 |
| H  | 4.607288 | -1.79728 | -2.89095 |
| H  | 2.281157 | -2.71808 | -0.09885 |
| H  | 3.251241 | -3.46605 | -2.9191  |
| H  | 1.732031 | -2.59889 | -2.55639 |
| H  | 1.989718 | -4.26434 | -1.96527 |
| H  | 3.741326 | -4.72133 | -0.16524 |
| H  | 4.615692 | -3.37823 | 0.617019 |
| H  | 4.987689 | -3.81418 | -1.06847 |
| H  | -0.15604 | -2.35314 | 2.367304 |
| H  | -1.03527 | -0.81167 | 2.512865 |
| H  | -0.40091 | -1.62523 | 3.978913 |
| H  | 0.119107 | 1.206458 | 3.445967 |
| H  | 1.911081 | 1.315546 | 3.501266 |
| H  | 1.025828 | 0.363317 | 4.731496 |
| H  | 4.229551 | -1.76561 | 2.087563 |
| H  | 2.481963 | -1.90397 | 4.157979 |
| Be | 0.375282 | 0.761876 | 0.352156 |
| C  | -1.02746 | 0.725263 | -0.70643 |
| C  | -0.468   | 1.015575 | -2.1723  |
| C  | -1.71129 | 0.824415 | -3.02245 |
| C  | -2.57996 | 0.078399 | -2.3296  |
| N  | -2.16862 | -0.16653 | -1.02543 |
| C  | 0.256089 | 2.333551 | -2.45977 |
| C  | 0.524926 | -0.10676 | -2.54393 |

|   |          |          |          |
|---|----------|----------|----------|
| C | -2.87731 | -1.06771 | -0.18199 |
| C | -4.21512 | -0.79532 | 0.201061 |
| C | -4.86196 | -1.67427 | 1.074509 |
| C | -4.22542 | -2.80291 | 1.571153 |
| C | -2.94624 | -3.11378 | 1.123748 |
| C | -2.27514 | -2.28905 | 0.216068 |
| C | -5.0071  | 0.38555  | -0.3452  |
| C | -1.00545 | -2.7878  | -0.46468 |
| C | -0.35566 | -4.00842 | 0.195621 |
| C | -1.342   | -3.16062 | -1.9204  |
| C | -5.74886 | 1.190952 | 0.728718 |
| C | -6.00653 | -0.09255 | -1.41136 |
| H | -6.20565 | 2.087492 | 0.272963 |
| H | -5.06198 | 1.523735 | 1.520838 |
| H | -6.56599 | 0.608932 | 1.190821 |
| H | -4.29411 | 1.068422 | -0.82717 |
| H | -5.52055 | -0.68201 | -2.20682 |
| H | -6.51281 | 0.768024 | -1.88397 |
| H | -6.78248 | -0.73514 | -0.95738 |
| H | -5.88912 | -1.46173 | 1.384387 |
| H | -4.73874 | -3.46228 | 2.27726  |
| H | -2.48128 | -4.04016 | 1.46777  |
| H | -0.26938 | -1.96467 | -0.47116 |
| H | -1.00304 | -4.89971 | 0.123751 |
| H | -0.11849 | -3.8551  | 1.260395 |
| H | 0.585258 | -4.256   | -0.32114 |
| H | -0.44396 | -3.51638 | -2.45436 |
| H | -1.75509 | -2.30952 | -2.48155 |
| H | -2.09014 | -3.97349 | -1.93191 |
| H | 0.092964 | -1.09655 | -2.34589 |
| H | 1.467379 | -0.0106  | -1.9704  |
| H | 0.784488 | -0.05784 | -3.61728 |
| H | 0.570324 | 2.328138 | -3.51953 |
| H | 1.165003 | 2.449029 | -1.84534 |
| H | -0.37919 | 3.21247  | -2.30618 |
| H | -3.51017 | -0.36829 | -2.68428 |
| H | -1.80917 | 1.131517 | -4.06442 |
| C | -2.23561 | 3.105039 | -0.52113 |
| C | -1.77697 | 4.366059 | -0.63917 |
| C | -0.45305 | 4.764274 | -0.17662 |
| C | 0.349047 | 3.867432 | 0.435695 |
| C | -0.04173 | 2.471378 | 0.676736 |
| C | -1.40987 | 2.030233 | 0.103783 |
| H | -3.22936 | 2.835933 | -0.88906 |
| H | -2.41015 | 5.120741 | -1.11805 |
| H | -0.1345  | 5.802048 | -0.31012 |



|    |          |          |          |
|----|----------|----------|----------|
| H  | 1.303838 | 4.202888 | 0.855748 |
| H  | -0.04054 | 2.361888 | 1.776644 |
| Cl | -2.39156 | 1.448183 | 1.622333 |

CAAC2Be+BrPhc3

|   |          |          |          |
|---|----------|----------|----------|
| C | -1.60560 | 0.15042  | 1.36766  |
| C | -1.32957 | 0.47330  | 2.82271  |
| C | -2.61412 | 1.11241  | 3.28244  |
| C | -3.48566 | 1.08514  | 2.27569  |
| N | -2.85475 | 0.49265  | 1.13648  |
| C | -1.09670 | -0.84446 | 3.60345  |
| C | -0.10511 | 1.38998  | 2.97434  |
| C | -3.57745 | 0.26834  | -0.09185 |
| C | -3.97566 | -1.04781 | -0.40824 |
| C | -4.65421 | -1.22862 | -1.61565 |
| C | -4.95229 | -0.15316 | -2.44684 |
| C | -4.56908 | 1.13267  | -2.09292 |
| C | -3.85960 | 1.37245  | -0.91226 |
| C | -3.73026 | -2.21976 | 0.53716  |
| C | -3.42146 | 2.78878  | -0.56841 |
| C | -2.77095 | 3.49291  | -1.76428 |
| C | -4.59946 | 3.61641  | -0.03417 |
| C | -3.82953 | -3.58556 | -0.14475 |
| C | -4.68980 | -2.16344 | 1.73658  |
| H | -3.54749 | -4.37554 | 0.57079  |
| H | -3.14933 | -3.66031 | -1.00940 |
| H | -4.85869 | -3.80674 | -0.47846 |
| H | -2.69786 | -2.13445 | 0.91397  |
| H | -4.59760 | -1.22494 | 2.30724  |
| H | -4.48113 | -2.99548 | 2.43135  |
| H | -5.73764 | -2.25446 | 1.39929  |
| H | -4.96364 | -2.22992 | -1.91794 |
| H | -5.48714 | -0.32411 | -3.385   |
| H | -4.80934 | 1.964932 | -2.75862 |
| H | -2.65839 | 2.729974 | 0.225818 |
| H | -3.49772 | 3.681433 | -2.57295 |
| H | -1.94444 | 2.893382 | -2.17626 |
| H | -2.36853 | 4.472833 | -1.45728 |
| H | -4.26107 | 4.626537 | 0.254875 |
| H | -5.06907 | 3.150726 | 0.848023 |
| H | -5.38057 | 3.727175 | -0.80717 |
| H | -0.28081 | 2.359819 | 2.489643 |
| H | 0.787917 | 0.928039 | 2.519808 |
| H | 0.095037 | 1.566396 | 4.044847 |
| H | -0.11574 | -1.27302 | 3.345628 |

|    |          |          |          |
|----|----------|----------|----------|
| H  | -1.88433 | -1.58796 | 3.393632 |
| H  | -1.10155 | -0.62685 | 4.684545 |
| H  | -4.52332 | 1.406164 | 2.198179 |
| H  | -2.79183 | 1.494617 | 4.288005 |
| Be | -0.48414 | -0.66993 | 0.279501 |
| C  | 0.899676 | -0.54362 | -0.80238 |
| C  | 0.263002 | -0.78087 | -2.25422 |
| C  | 1.454327 | -0.54156 | -3.16075 |
| C  | 2.348195 | 0.19142  | -2.48747 |
| N  | 2.012464 | 0.375121 | -1.15197 |
| C  | -0.46955 | -2.09073 | -2.55881 |
| C  | -0.75266 | 0.350085 | -2.5245  |
| C  | 2.775594 | 1.236474 | -0.31442 |
| C  | 4.146352 | 0.974195 | -0.06215 |
| C  | 4.844495 | 1.809957 | 0.814454 |
| C  | 4.227051 | 2.883254 | 1.440277 |
| C  | 2.909155 | 3.190719 | 1.120052 |
| C  | 2.183957 | 2.412797 | 0.21337  |
| C  | 4.91825  | -0.14649 | -0.74797 |
| C  | 0.860743 | 2.928735 | -0.33916 |
| C  | 0.243662 | 4.091924 | 0.445036 |
| C  | 1.087256 | 3.405063 | -1.78609 |
| C  | 5.778058 | -0.9923  | 0.200073 |
| C  | 5.808373 | 0.426444 | -1.86383 |
| H  | 6.205828 | -1.84922 | -0.35013 |
| H  | 5.182602 | -1.38674 | 1.037089 |
| H  | 6.625224 | -0.41632 | 0.612958 |
| H  | 4.185162 | -0.82375 | -1.20805 |
| H  | 5.242906 | 1.05328  | -2.57326 |
| H  | 6.291774 | -0.38753 | -2.43318 |
| H  | 6.6057   | 1.060117 | -1.43519 |
| H  | 5.897751 | 1.604247 | 1.025197 |
| H  | 4.783349 | 3.506187 | 2.146885 |
| H  | 2.457379 | 4.082437 | 1.55989  |
| H  | 0.13735  | 2.094585 | -0.34832 |
| H  | 0.834251 | 5.017176 | 0.325541 |
| H  | 0.158632 | 3.894672 | 1.524634 |
| H  | -0.7683  | 4.303791 | 0.062068 |
| H  | 0.151737 | 3.79169  | -2.22662 |
| H  | 1.462144 | 2.600921 | -2.43628 |
| H  | 1.829589 | 4.223203 | -1.79408 |
| H  | -0.31593 | 1.333296 | -2.30424 |
| H  | -1.66459 | 0.222529 | -1.91109 |
| H  | -1.06619 | 0.346551 | -3.58435 |
| H  | -0.82872 | -2.04701 | -3.60322 |
| H  | -1.35111 | -2.2301  | -1.91053 |

|    |          |          |          |
|----|----------|----------|----------|
| H  | 0.172048 | -2.97367 | -2.46335 |
| H  | 3.246237 | 0.671359 | -2.87793 |
| H  | 1.495258 | -0.7994  | -4.21969 |
| C  | 2.15093  | -2.89436 | -0.80957 |
| C  | 1.73307  | -4.16903 | -0.95343 |
| C  | 0.460647 | -4.63797 | -0.42561 |
| C  | -0.34067 | -3.79045 | 0.257599 |
| C  | 0.001743 | -2.38697 | 0.502642 |
| C  | 1.328293 | -1.88621 | -0.09337 |
| H  | 3.104618 | -2.56975 | -1.23356 |
| H  | 2.360486 | -4.87506 | -1.50794 |
| H  | 0.179979 | -5.6855  | -0.56633 |
| H  | -1.25289 | -4.17672 | 0.726019 |
| H  | -0.00112 | -2.28059 | 1.600864 |
| Br | 2.45243  | -1.35116 | 1.600616 |

#### CAAC2Be

|   |          |          |          |
|---|----------|----------|----------|
| C | -0.77636 | -0.00012 | 1.45163  |
| C | -0.30183 | 0.00007  | 2.90716  |
| C | -1.61179 | 0.00008  | 3.67900  |
| C | -2.63660 | -0.00006 | 2.81082  |
| N | -2.16003 | -0.00015 | 1.50362  |
| C | 0.53502  | -1.25470 | 3.22548  |
| C | 0.53494  | 1.25494  | 3.22522  |
| C | -2.95178 | -0.00030 | 0.32420  |
| C | -3.30248 | -1.23226 | -0.26070 |
| C | -4.02441 | -1.20735 | -1.45779 |
| C | -4.37975 | -0.00059 | -2.05338 |
| C | -4.02524 | 1.20632  | -1.45758 |
| C | -3.30333 | 1.23152  | -0.26049 |
| C | -2.92201 | -2.55344 | 0.38921  |
| C | -2.92368 | 2.55286  | 0.38961  |
| C | -1.97606 | 3.37231  | -0.49363 |
| C | -4.17092 | 3.35662  | 0.77882  |
| C | -1.97438 | -3.37254 | -0.49432 |
| C | -4.16884 | -3.35766 | 0.77882  |
| H | -1.05720 | -2.80274 | -0.71915 |
| H | -2.44763 | -3.65026 | -1.45357 |
| H | -1.68011 | -4.30433 | 0.02021  |
| H | -2.37763 | -2.32088 | 1.31693  |
| H | -4.83254 | -2.76752 | 1.43402  |
| H | -3.88169 | -4.27646 | 1.31976  |
| H | -4.75206 | -3.65994 | -0.10954 |
| H | -4.30957 | -2.14859 | -1.93752 |
| H | -4.93861 | -0.0007  | -2.99365 |

|    |          |          |          |
|----|----------|----------|----------|
| H  | -4.31108 | 2.147435 | -1.93716 |
| H  | -2.37953 | 2.32053  | 1.317515 |
| H  | -2.44907 | 3.649696 | -1.45308 |
| H  | -1.05853 | 2.802926 | -0.71802 |
| H  | -1.68241 | 4.304291 | 0.020925 |
| H  | -3.88426 | 4.275492 | 1.319899 |
| H  | -4.83464 | 2.766233 | 1.433769 |
| H  | -4.75396 | 3.658781 | -0.1097  |
| H  | -0.02853 | 2.173311 | 2.987891 |
| H  | 1.467915 | 1.256159 | 2.633702 |
| H  | 0.806975 | 1.281934 | 4.296838 |
| H  | 1.467967 | -1.256   | 2.633909 |
| H  | -0.02842 | -2.17315 | 2.988352 |
| H  | 0.807093 | -1.28147 | 4.297083 |
| H  | -3.71359 | -0.00011 | 2.98809  |
| H  | -1.68719 | 0.00015  | 4.767246 |
| Be | -1.4E-05 | -0.00028 | -7.6E-05 |
| C  | 0.776421 | -4.4E-05 | -1.45173 |
| C  | 0.301966 | 0.000228 | -2.90729 |
| C  | 1.611982 | 0.00085  | -3.67905 |
| C  | 2.636739 | 0.000525 | -2.81082 |
| N  | 2.160091 | -7.8E-05 | -1.50364 |
| C  | -0.53441 | -1.25478 | -3.22587 |
| C  | -0.53521 | 1.254873 | -3.22515 |
| C  | 2.951732 | 0.000151 | -0.32416 |
| C  | 3.30295  | -1.23166 | 0.260744 |
| C  | 4.024705 | -1.20645 | 1.457934 |
| C  | 4.379435 | 0.000461 | 2.053582 |
| C  | 4.024449 | 1.207216 | 1.457762 |
| C  | 3.302637 | 1.232122 | 0.260603 |
| C  | 2.923142 | -2.55298 | -0.38928 |
| C  | 2.922577 | 2.553315 | -0.38954 |
| C  | 1.97491  | 3.372657 | 0.493748 |
| C  | 4.169611 | 3.357301 | -0.77897 |
| C  | 1.975358 | -3.37228 | 0.49391  |
| C  | 4.17032  | -3.3569  | -0.77837 |
| H  | 1.057901 | -2.80274 | 0.71826  |
| H  | 2.448252 | -3.64977 | 1.453388 |
| H  | 1.681586 | -4.30421 | -0.02066 |
| H  | 2.37907  | -2.32061 | -1.31722 |
| H  | 4.834129 | -2.76664 | -1.43334 |
| H  | 3.883605 | -4.2758  | -1.31937 |
| H  | 4.753283 | -3.65901 | 0.11022  |
| H  | 4.310265 | -2.14757 | 1.937681 |
| H  | 4.938195 | 0.000586 | 2.993916 |
| H  | 4.309814 | 2.148458 | 1.937376 |

|   |          |          |          |
|---|----------|----------|----------|
| H | 2.378363 | 2.320791 | -1.31736 |
| H | 2.447957 | 3.650178 | 1.453141 |
| H | 1.05749  | 2.80313  | 0.718267 |
| H | 1.681056 | 4.304554 | -0.02084 |
| H | 3.882705 | 4.276072 | -1.32008 |
| H | 4.833353 | 2.766979 | -1.43396 |
| H | 4.752704 | 3.659624 | 0.109453 |
| H | 0.027899 | 2.173394 | -2.9875  |
| H | -1.46826 | 1.255609 | -2.63375 |
| H | -0.80712 | 1.282066 | -4.29679 |
| H | -0.80659 | -1.28135 | -4.29746 |
| H | -1.4673  | -1.25662 | -2.6342  |
| H | 0.029418 | -2.17306 | -2.98905 |
| H | 3.713741 | 0.000678 | -2.98802 |
| H | 1.687445 | 0.001291 | -4.7673  |

NtBuNtBuBe

|    |          |          |          |
|----|----------|----------|----------|
| C  | 0.68018  | -1.28098 | -0.00015 |
| C  | -0.68018 | -1.28098 | -0.00011 |
| H  | 1.28520  | -2.19096 | -0.00002 |
| H  | -1.28519 | -2.19096 | 0.00004  |
| Be | 0.00001  | 0.83961  | -0.00050 |
| N  | 1.28192  | -0.00765 | -0.00041 |
| N  | -1.28192 | -0.00764 | -0.00031 |
| C  | -2.72399 | 0.17164  | 0.00001  |
| C  | -3.35030 | -0.45146 | -1.25914 |
| C  | -3.34949 | -0.45032 | 1.26013  |
| C  | -2.98972 | 1.68160  | -0.00060 |
| H  | -2.90225 | -0.00980 | -2.16588 |
| H  | -3.17546 | -1.54033 | -1.29353 |
| H  | -4.44149 | -0.28281 | -1.28594 |
| H  | -2.90099 | -0.00770 | 2.16617  |
| H  | -4.44069 | -0.28185 | 1.28742  |
| H  | -3.17440 | -1.53912 | 1.29547  |
| H  | -4.07092 | 1.90206  | -0.00027 |
| H  | -2.54820 | 2.15139  | 0.89831  |
| H  | -2.54889 | 2.15057  | -0.90028 |
| C  | 2.72400  | 0.17164  | 0.00001  |
| C  | 3.35039  | -0.45162 | -1.25901 |
| C  | 2.98971  | 1.68160  | -0.00076 |
| C  | 3.34938  | -0.45017 | 1.26025  |
| H  | 3.17563  | -1.54050 | -1.29324 |
| H  | 2.90235  | -0.01013 | -2.16584 |
| H  | 4.44157  | -0.28290 | -1.28580 |
| H  | 2.548048 | 2.151509 | 0.89802  |

|   |          |          |          |
|---|----------|----------|----------|
| H | 4.070914 | 1.902064 | -0.00026 |
| H | 2.549039 | 2.150457 | -0.90057 |
| H | 4.440601 | -0.28177 | 1.287562 |
| H | 2.900881 | -0.00739 | 2.166212 |
| H | 3.174213 | -1.53895 | 1.295753 |

NNBe

|    |          |          |          |
|----|----------|----------|----------|
| C  | -0.68010 | 0.98667  | -0.00001 |
| C  | 0.68009  | 0.98669  | -0.00001 |
| H  | -1.30050 | 1.88743  | 0.00015  |
| H  | 1.30041  | 1.88751  | 0.00009  |
| Be | 0.00002  | -1.12403 | 0.00012  |
| C  | 2.71868  | -0.38386 | -0.00002 |
| H  | 3.16854  | 0.09256  | -0.89389 |
| H  | 3.16857  | 0.09241  | 0.89391  |
| H  | 3.02692  | -1.44256 | -0.00012 |
| C  | -2.71868 | -0.38384 | -0.00002 |
| H  | -3.16851 | 0.09250  | -0.89395 |
| H  | -3.02699 | -1.44252 | 0.00001  |
| H  | -3.16854 | 0.09255  | 0.89387  |
| N  | -1.28544 | -0.28560 | -0.00002 |
| N  | 1.28545  | -0.28551 | -0.00001 |

NPBe

|    |          |          |          |
|----|----------|----------|----------|
| C  | 0.99583  | 0.96702  | 0.19630  |
| C  | -0.32133 | 1.23240  | 0.02247  |
| H  | 1.70122  | 1.74361  | 0.52565  |
| H  | -0.69247 | 2.24522  | 0.21269  |
| Be | 0.29914  | -1.09667 | -0.46024 |
| C  | -2.46991 | -0.53422 | 0.83699  |
| H  | -1.86700 | -0.67625 | 1.74844  |
| H  | -3.21563 | 0.25559  | 1.03196  |
| H  | -3.02038 | -1.46606 | 0.62057  |
| C  | 2.95607  | -0.49837 | 0.17177  |
| H  | 3.56156  | 0.14091  | -0.49982 |
| H  | 3.25619  | -0.27297 | 1.21377  |
| H  | 3.22884  | -1.54659 | -0.03212 |
| N  | 1.54192  | -0.30942 | -0.03276 |
| P  | -1.46042 | -0.05812 | -0.67440 |

NOBe

|   |         |         |         |
|---|---------|---------|---------|
|   | -       |         |         |
| C | 1.39725 | 0.65952 | 0.00008 |
| C | -       | 0.91440 | -       |

|    |         |         |         |
|----|---------|---------|---------|
|    | 0.06699 |         | 0.00015 |
|    | -       |         |         |
| H  | 2.20638 | 1.39243 | 0.00018 |
|    |         |         | -       |
| H  | 0.38411 | 1.91071 | 0.00015 |
|    | -       | -       | -       |
| Be | 0.38521 | 1.25674 | 0.00016 |
|    |         |         | -       |
| C  | 2.18354 | 0.09039 | 0.00029 |
|    |         |         | -       |
| H  | 2.54299 | 0.45618 | 0.89386 |
| H  | 2.54274 | 0.45619 | 0.89453 |
|    |         |         | -       |
| H  | 2.66832 | 1.08015 | 0.00036 |
|    |         |         | -       |
| N  | 0.75469 | 0.24040 | 0.00006 |
|    | -       | -       | -       |
| O  | 1.74870 | 0.66585 | 0.00027 |

NSBe

|    |          |          |          |
|----|----------|----------|----------|
| C  | -0.85915 | 1.07335  | -0.00007 |
| C  | 0.49255  | 0.99098  | 0.00005  |
| H  | -1.39759 | 2.02269  | -0.00011 |
| H  | 1.12369  | 1.88820  | 0.00012  |
| Be | -0.07860 | -1.20827 | -0.00002 |
| C  | 2.56431  | -0.30745 | 0.00024  |
| H  | 2.99335  | 0.18300  | -0.89451 |
| H  | 2.99318  | 0.18296  | 0.89509  |
| H  | 2.90573  | -1.35525 | 0.00025  |
| N  | 1.12300  | -0.25738 | 0.00010  |
| S  | -1.83445 | -0.42676 | -0.00017 |

FPh

|   |          |          |          |
|---|----------|----------|----------|
| C | 0.93748  | -0.00001 | 0.00054  |
| C | 0.26172  | 1.21510  | -0.00016 |
| C | 0.26171  | -1.21503 | -0.00013 |
| H | 0.83252  | 2.14683  | 0.00006  |
| H | 0.83250  | -2.14676 | -0.00048 |
| C | -1.13297 | 1.20710  | -0.00022 |
| C | -1.13292 | -1.20709 | -0.00006 |
| H | -1.67572 | 2.15665  | 0.00040  |
| H | -1.67557 | -2.15668 | 0.00028  |
| C | -1.83350 | -0.00005 | 0.00006  |
| H | -2.92675 | -0.00005 | 0.00029  |
| F | 2.27155  | -0.00001 | -0.00007 |

CIPh

|    |          |          |          |
|----|----------|----------|----------|
| C  | -0.51070 | -0.00004 | -0.00005 |
| C  | 0.17518  | 1.21388  | 0.00017  |
| C  | 0.17525  | -1.21392 | 0.00011  |
| H  | -0.38163 | 2.15356  | 0.00043  |
| H  | -0.38183 | -2.15346 | 0.00042  |
| C  | 1.56972  | 1.20644  | 0.00006  |
| C  | 1.56974  | -1.20642 | 0.00014  |
| H  | 2.11112  | 2.15673  | 0.00024  |
| H  | 2.11148  | -2.15653 | 0.00020  |
| C  | 2.27003  | 0.00002  | -0.00027 |
| H  | 3.36340  | 0.00001  | -0.00076 |
| Cl | -2.25399 | 0.00000  | -0.00009 |

#### BrPh

|    |         |          |          |
|----|---------|----------|----------|
| C  | 0.09190 | 0.00021  | 0.00021  |
| C  | 0.77824 | 1.21387  | 0.00010  |
| C  | 0.77826 | -1.21389 | 0.00017  |
| H  | 0.22786 | 2.15771  | 0.00055  |
| H  | 0.22708 | -2.15728 | 0.00041  |
| C  | 2.17334 | 1.20629  | -0.00015 |
| C  | 2.17303 | -1.20648 | -0.00003 |
| H  | 2.71430 | 2.15685  | 0.00033  |
| H  | 2.71460 | -2.15670 | -0.00016 |
| C  | 2.87312 | 0.00000  | -0.00008 |
| H  | 3.96653 | -0.00034 | -0.00047 |
|    | -       |          |          |
| Br | 1.80165 | -0.00001 | -0.00006 |

#### IPh

|   |          |          |          |
|---|----------|----------|----------|
| C | 0.55583  | -0.00017 | -0.00055 |
| C | 1.24602  | -1.21305 | -0.00065 |
| C | 1.24585  | 1.21298  | -0.00062 |
| H | 0.70397  | -2.16201 | -0.00023 |
| H | 0.70314  | 2.16157  | -0.00134 |
| C | 2.64143  | -1.20595 | -0.00013 |
| C | 2.64096  | 1.20613  | 0.00019  |
| H | 3.18208  | -2.15686 | 0.00042  |
| H | 3.18202  | 2.15681  | 0.00037  |
| C | 3.34117  | 0.00013  | 0.00055  |
| H | 4.43472  | 0.00047  | 0.00178  |
| I | -1.55158 | -0.00001 | 0.00012  |

#### 1.1Fa



|    |          |          |          |
|----|----------|----------|----------|
| C  | 2.49273  | 0.56901  | -0.75572 |
| C  | 1.82030  | 1.74770  | -0.76541 |
| H  | 3.44917  | 0.41125  | -1.26079 |
| H  | 2.17336  | 2.64349  | -1.28305 |
| Be | 0.62118  | 0.29629  | 0.55042  |
| C  | -0.21574 | 2.93166  | 0.02280  |
| C  | 2.50211  | -1.75641 | 0.11886  |
| N  | 1.87679  | -0.44903 | -0.00879 |
| N  | 0.62787  | 1.74775  | -0.02549 |
| C  | -1.78164 | -0.97570 | 0.53183  |
| C  | -1.54824 | -1.27468 | -0.79665 |
| C  | -2.99606 | -1.11848 | 1.17262  |
| H  | -0.55348 | -1.13043 | -1.23046 |
| H  | -3.10166 | -0.85487 | 2.22664  |
| C  | -2.63123 | -1.75489 | -1.53459 |
| C  | -4.06220 | -1.60206 | 0.41296  |
| H  | -2.48944 | -2.00009 | -2.59011 |
| H  | -5.04144 | -1.72863 | 0.88184  |
| C  | -3.88085 | -1.91746 | -0.93465 |
| H  | -4.72230 | -2.29208 | -1.52293 |
| F  | -0.72403 | -0.48022 | 1.29199  |
| C  | -1.45945 | 2.59730  | 0.85539  |
| H  | -2.04593 | 1.79273  | 0.37569  |
| H  | -1.17202 | 2.26973  | 1.87116  |
| H  | -2.11741 | 3.47786  | 0.95526  |
| C  | -0.66940 | 3.33901  | -1.39110 |
| H  | 0.19117  | 3.61395  | -2.02424 |
| H  | -1.18969 | 2.495697 | -1.87831 |
| H  | -1.35535 | 4.204544 | -1.35733 |
| C  | 0.526508 | 4.103887 | 0.689802 |
| H  | 0.833401 | 3.824554 | 1.712641 |
| H  | 1.438063 | 4.368693 | 0.127289 |
| H  | -0.11136 | 5.004617 | 0.74505  |
| C  | 1.603142 | -2.63511 | 0.997408 |
| H  | 0.610265 | -2.77477 | 0.53287  |
| H  | 2.048497 | -3.63438 | 1.143315 |
| H  | 1.462713 | -2.17509 | 1.992103 |
| C  | 2.654885 | -2.42819 | -1.25847 |
| H  | 3.288351 | -1.82314 | -1.92895 |
| H  | 3.115265 | -3.42837 | -1.16719 |
| H  | 1.668117 | -2.54259 | -1.7414  |
| C  | 3.88237  | -1.63752 | 0.791265 |
| H  | 3.779513 | -1.15537 | 1.778739 |
| H  | 4.349649 | -2.62948 | 0.928017 |
| H  | 4.568175 | -1.02049 | 0.186419 |

1.2aF

|    |          |          |          |
|----|----------|----------|----------|
| C  | 1.46813  | 0.81927  | -1.32054 |
| C  | 0.19368  | 1.34006  | -1.37221 |
| H  | 2.11454  | 0.74788  | -2.20101 |
| H  | -0.26494 | 1.71714  | -2.28957 |
| Be | 0.54458  | 0.52605  | 0.79649  |
| C  | -1.71560 | 2.08604  | -0.00789 |
| C  | 3.18092  | -0.21847 | 0.12909  |
| N  | 1.87237  | 0.39354  | -0.08280 |
| N  | -0.46203 | 1.34635  | -0.16376 |
| C  | -1.01692 | -1.16989 | 0.47104  |
| C  | -0.52291 | -1.68020 | -0.70339 |
| C  | -2.16811 | -1.57264 | 1.11564  |
| H  | 0.36549  | -1.28225 | -1.20717 |
| H  | -2.46294 | -1.16291 | 2.08254  |
| C  | -1.31630 | -2.65556 | -1.32445 |
| C  | -2.94230 | -2.53111 | 0.45943  |
| H  | -0.98186 | -3.07168 | -2.27988 |
| H  | -3.87929 | -2.86201 | 0.91660  |
| C  | -2.51592 | -3.07676 | -0.75500 |
| H  | -3.12046 | -3.83849 | -1.25394 |
| F  | 0.00517  | -0.52430 | 1.81906  |
| C  | -2.11136 | 2.04492  | 1.47176  |
| H  | -2.29537 | 1.01437  | 1.80974  |
| H  | -1.30650 | 2.47261  | 2.09601  |
| H  | -3.03036 | 2.62982  | 1.64704  |
| C  | -2.83517 | 1.47817  | -0.86983 |
| H  | -2.57301 | 1.50947  | -1.94138 |
| H  | -3.01672 | 0.425753 | -0.5972  |
| H  | -3.77678 | 2.039935 | -0.73849 |
| C  | -1.49975 | 3.557842 | -0.40659 |
| H  | -0.67152 | 3.994546 | 0.177434 |
| H  | -1.2493  | 3.657115 | -1.476   |
| H  | -2.41413 | 4.147585 | -0.21789 |
| C  | 3.343672 | -0.44623 | 1.636161 |
| H  | 2.556086 | -1.11907 | 2.017018 |
| H  | 4.323975 | -0.89925 | 1.863582 |
| H  | 3.272826 | 0.513551 | 2.178785 |
| C  | 3.268838 | -1.57191 | -0.59845 |
| H  | 3.117011 | -1.44779 | -1.68546 |
| H  | 4.256123 | -2.04362 | -0.44736 |
| H  | 2.494074 | -2.26117 | -0.22012 |
| C  | 4.302229 | 0.712851 | -0.3603  |
| H  | 4.22634  | 1.694257 | 0.138536 |
| H  | 5.294231 | 0.280648 | -0.14057 |
| H  | 4.246534 | 0.880448 | -1.44968 |

1.3aF

|    |          |          |          |
|----|----------|----------|----------|
| C  | -0.73964 | -1.61272 | -1.29835 |
| C  | 0.73968  | -1.61272 | -1.29834 |
| H  | -1.28582 | -2.02671 | -2.15634 |
| H  | 1.28588  | -2.02671 | -2.15633 |
| Be | 0.00004  | -0.28290 | 0.78482  |
| C  | 2.73772  | -1.08719 | -0.01446 |
| C  | -2.73769 | -1.08725 | -0.01446 |
| N  | -1.29037 | -1.11802 | -0.26416 |
| N  | 1.29040  | -1.11800 | -0.26416 |
| C  | 0.00001  | 1.41157  | 0.23597  |
| C  | -0.00001 | 1.83040  | -1.10301 |
| C  | -0.00001 | 2.43271  | 1.20286  |
| H  | 0.00001  | 1.08072  | -1.91030 |
| H  | -0.00001 | 2.15988  | 2.26570  |
| C  | -0.00004 | 3.17808  | -1.47254 |
| C  | -0.00005 | 3.78703  | 0.85711  |
| H  | -0.00006 | 3.46137  | -2.53097 |
| H  | -0.00007 | 4.55365  | 1.63941  |
| C  | -0.00007 | 4.16534  | -0.48607 |
| H  | -0.00010 | 5.22451  | -0.76317 |
| F  | 0.00003  | -0.69882 | 2.21087  |
| C  | 3.11201  | 0.35226  | 0.36560  |
| H  | 2.88190  | 1.05249  | -0.45386 |
| H  | 2.55095  | 0.68321  | 1.25341  |
| H  | 4.19162  | 0.40204  | 0.58777  |
| C  | 3.56685  | -1.54614 | -1.21589 |
| H  | 3.36605  | -2.59878 | -1.48269 |
| H  | 3.385708 | -0.91071 | -2.10084 |
| H  | 4.638048 | -1.47148 | -0.96708 |
| C  | 2.959056 | -2.02097 | 1.187219 |
| H  | 2.313464 | -1.71771 | 2.027516 |
| H  | 2.716236 | -3.06458 | 0.921002 |
| H  | 4.015263 | -1.97703 | 1.503536 |
| C  | -3.11201 | 0.352157 | 0.365736 |
| H  | -2.88154 | 1.052521 | -0.45351 |
| H  | -4.1917  | 0.401982 | 0.587519 |
| H  | -2.55125 | 0.682888 | 1.253813 |
| C  | -3.56684 | -1.54608 | -1.21592 |
| H  | -3.36609 | -2.59872 | -1.48277 |
| H  | -4.63804 | -1.47138 | -0.96711 |
| H  | -3.38567 | -0.91062 | -2.10083 |
| C  | -2.95904 | -2.02113 | 1.187137 |
| H  | -2.31352 | -1.71789 | 2.027494 |
| H  | -4.01527 | -1.97729 | 1.503396 |
| H  | -2.71613 | -3.0647  | 0.920848 |

1.4aF

|    |          |          |          |
|----|----------|----------|----------|
| C  | -0.29322 | -1.31586 | -1.44548 |
| C  | 1.09222  | -1.09688 | -1.41318 |
| H  | -0.84797 | -1.49531 | -2.36830 |
| H  | 1.70572  | -1.18214 | -2.31652 |
| Be | 0.31453  | -0.61855 | 0.83549  |
| C  | 2.97378  | -0.32717 | -0.00017 |
| C  | -2.29399 | -1.48072 | -0.03474 |
| N  | -0.88937 | -1.05699 | -0.26136 |
| N  | 1.57644  | -0.69498 | -0.25598 |
| C  | -0.72430 | 0.99183  | 0.03376  |
| C  | -0.65199 | 1.58386  | -1.21028 |
| C  | -0.99133 | 1.74842  | 1.17352  |
| H  | -0.45787 | 0.95768  | -2.09459 |
| H  | -1.03438 | 1.28400  | 2.16249  |
| C  | -0.81330 | 2.96343  | -1.34181 |
| C  | -1.15387 | 3.13230  | 1.04393  |
| H  | -0.75093 | 3.43376  | -2.32810 |
| H  | -1.34403 | 3.73724  | 1.93599  |
| C  | -1.06691 | 3.73953  | -0.20850 |
| H  | -1.20339 | 4.82055  | -0.30476 |
| F  | 0.34015  | -0.70318 | 2.29266  |
| C  | 2.95382  | 1.08276  | 0.61164  |
| H  | 2.51051  | 1.80435  | -0.09610 |
| H  | 2.34931  | 1.09526  | 1.53466  |
| H  | 3.97713  | 1.41314  | 0.86171  |
| C  | 3.83339  | -0.32599 | -1.26692 |
| H  | 3.89279  | -1.32824 | -1.72633 |
| H  | 3.449245 | 0.386108 | -2.01853 |
| H  | 4.861877 | -0.02    | -1.01223 |
| C  | 3.535341 | -1.33559 | 1.013611 |
| H  | 2.914142 | -1.35    | 1.924693 |
| H  | 3.538692 | -2.35154 | 0.581593 |
| H  | 4.570361 | -1.07221 | 1.294024 |
| C  | -2.80278 | -0.95193 | 1.309823 |
| H  | -3.02194 | 0.125498 | 1.262691 |
| H  | -3.73785 | -1.4742  | 1.572924 |
| H  | -2.06445 | -1.12888 | 2.109179 |
| C  | -3.22642 | -1.00892 | -1.15618 |
| H  | -2.99505 | -1.48071 | -2.1259  |
| H  | -4.26794 | -1.27226 | -0.90518 |
| H  | -3.1667  | 0.086462 | -1.2736  |
| C  | -2.25069 | -3.01785 | 0.028826 |
| H  | -1.57189 | -3.34568 | 0.834364 |
| H  | -3.25913 | -3.41532 | 0.235351 |
| H  | -1.8937  | -3.44839 | -0.92124 |

1.5aF

|    |          |          |          |
|----|----------|----------|----------|
| C  | -0.09016 | 0.50921  | -1.55042 |
| C  | -1.36868 | 0.08020  | -1.46375 |
| H  | 0.42002  | 0.75363  | -2.48000 |
| H  | -1.97052 | -0.03740 | -2.37334 |
| Be | -0.77694 | 0.14693  | 0.83796  |
| C  | -3.27467 | -0.67746 | -0.10623 |
| C  | 1.11137  | 1.98758  | 0.07835  |
| N  | 0.61286  | 0.57812  | -0.26931 |
| N  | -1.89862 | -0.19471 | -0.23777 |
| C  | 1.64595  | -0.45808 | -0.16994 |
| C  | 2.47520  | -0.76505 | -1.25434 |
| C  | 1.80150  | -1.16614 | 1.02546  |
| H  | 2.35709  | -0.24270 | -2.20452 |
| H  | 1.15843  | -0.93745 | 1.87886  |
| C  | 3.45037  | -1.75296 | -1.13821 |
| C  | 2.77600  | -2.15800 | 1.13563  |
| H  | 4.08953  | -1.98047 | -1.99612 |
| H  | 2.87970  | -2.70248 | 2.07822  |
| C  | 3.60634  | -2.45369 | 0.05757  |
| H  | 4.36932  | -3.23224 | 0.14410  |
| F  | -0.65361 | 0.21129  | 2.28256  |
| C  | 1.89536  | 1.95975  | 1.39437  |
| H  | 2.13311  | 2.99743  | 1.68345  |
| H  | 1.30381  | 1.50377  | 2.20362  |
| H  | 2.84681  | 1.41274  | 1.29412  |
| C  | -0.12831 | 2.87471  | 0.24452  |
| H  | -0.71595 | 2.57801  | 1.13170  |
| H  | 0.181494 | 3.922253 | 0.394449 |
| H  | -0.77489 | 2.829488 | -0.64737 |
| C  | 2.009948 | 2.54576  | -1.03009 |
| H  | 2.38415  | 3.537639 | -0.72571 |
| H  | 2.887766 | 1.900676 | -1.20111 |
| H  | 1.466596 | 2.672715 | -1.98049 |
| C  | -3.54751 | -0.90254 | 1.384637 |
| H  | -2.84222 | -1.64085 | 1.803649 |
| H  | -3.42663 | 0.035335 | 1.952884 |
| H  | -4.57447 | -1.27552 | 1.540007 |
| C  | -3.45185 | -2.00958 | -0.85423 |
| H  | -2.73061 | -2.75511 | -0.47726 |
| H  | -4.47243 | -2.40829 | -0.71677 |
| H  | -3.28317 | -1.89231 | -1.9392  |
| C  | -4.2668  | 0.366499 | -0.6465  |
| H  | -5.30962 | 0.030605 | -0.50824 |
| H  | -4.13516 | 1.325632 | -0.11621 |
| H  | -4.11589 | 0.550319 | -1.72492 |

1.1aCl

|    |          |          |          |
|----|----------|----------|----------|
| C  | -2.10626 | 1.12608  | 1.06175  |
| C  | -1.07814 | 2.01070  | 1.02430  |
| H  | -2.94477 | 1.20271  | 1.75840  |
| H  | -0.99768 | 2.86717  | 1.69859  |
| Be | -0.72564 | 0.49928  | -0.66782 |
| C  | 1.06165  | 2.61321  | -0.05233 |
| C  | -3.10806 | -0.88310 | 0.02655  |
| N  | -2.03869 | 0.10530  | 0.10142  |
| N  | -0.12619 | 1.77099  | 0.02531  |
| C  | 1.53561  | -1.47174 | -0.53783 |
| C  | 1.04613  | -1.55273 | 0.75941  |
| C  | 2.84619  | -1.78121 | -0.87698 |
| H  | 0.01105  | -1.27371 | 0.98301  |
| H  | 3.19281  | -1.69235 | -1.90885 |
| C  | 1.92434  | -1.96750 | 1.75998  |
| C  | 3.70637  | -2.19450 | 0.14081  |
| H  | 1.56314  | -2.03432 | 2.78950  |
| H  | 4.74470  | -2.43800 | -0.09957 |
| C  | 3.24800  | -2.28656 | 1.45508  |
| H  | 3.92959  | -2.60516 | 2.24812  |
| Cl | 0.45307  | -0.91315 | -1.83608 |
| C  | 1.91727  | 2.16573  | -1.24273 |
| H  | 2.31499  | 1.14810  | -1.08667 |
| H  | 1.32587  | 2.17701  | -2.17594 |
| H  | 2.77906  | 2.84233  | -1.37555 |
| C  | 1.90151  | 2.47440  | 1.23118  |
| H  | 1.33751  | 2.81523  | 2.11619  |
| H  | 2.171562 | 1.415506 | 1.391518 |
| H  | 2.830653 | 3.06933  | 1.169385 |
| C  | 0.67249  | 4.087406 | -0.26826 |
| H  | 0.080955 | 4.189756 | -1.19445 |
| H  | 0.062174 | 4.47293  | 0.565423 |
| H  | 1.570133 | 4.726117 | -0.35034 |
| C  | -2.77278 | -1.8934  | -1.07508 |
| H  | -1.83749 | -2.43361 | -0.84654 |
| H  | -3.57821 | -2.64071 | -1.17934 |
| H  | -2.6522  | -1.38524 | -2.04901 |
| C  | -3.24266 | -1.64451 | 1.35888  |
| H  | -3.4937  | -0.96359 | 2.189254 |
| H  | -4.03528 | -2.41146 | 1.299818 |
| H  | -2.29271 | -2.14846 | 1.610735 |
| C  | -4.44701 | -0.20558 | -0.31919 |
| H  | -4.35986 | 0.331502 | -1.2794  |
| H  | -5.26095 | -0.94821 | -0.40155 |
| H  | -4.73464 | 0.529318 | 0.451452 |

1.2acl

|    |          |          |          |
|----|----------|----------|----------|
| C  | -0.68708 | -1.67443 | -1.38248 |
| C  | 0.68999  | -1.67324 | -1.38257 |
| H  | -1.27913 | -2.08168 | -2.20656 |
| H  | 1.28264  | -2.07958 | -2.20666 |
| Be | 0.00066  | -0.49791 | 0.51902  |
| C  | 2.71117  | -1.25210 | -0.07960 |
| C  | -2.70887 | -1.25616 | -0.07957 |
| N  | -1.26085 | -1.12519 | -0.27185 |
| N  | 1.26300  | -1.12298 | -0.27205 |
| C  | -0.00156 | 1.64315  | 0.41088  |
| C  | -1.21772 | 2.24291  | 0.07863  |
| C  | 1.21341  | 2.24472  | 0.07751  |
| H  | -2.16251 | 1.81675  | 0.41339  |
| H  | 2.15915  | 1.82000  | 0.41141  |
| C  | -1.20825 | 3.38205  | -0.72306 |
| C  | 1.20153  | 3.38386  | -0.72414 |
| H  | -2.16192 | 3.82919  | -1.01870 |
| H  | 2.15427  | 3.83239  | -1.02067 |
| C  | -0.00398 | 3.95226  | -1.13949 |
| H  | -0.00493 | 4.84937  | -1.76403 |
| Cl | -0.00014 | 0.65388  | 2.24274  |
| C  | 3.07967  | -0.75611 | 1.32306  |
| H  | 2.84290  | 0.30907  | 1.46855  |
| H  | 2.52873  | -1.32582 | 2.09089  |
| H  | 4.16017  | -0.88883 | 1.50316  |
| C  | 3.47780  | -0.44678 | -1.14392 |
| H  | 3.26955  | -0.83043 | -2.15729 |
| H  | 3.185277 | 0.615834 | -1.12648 |
| H  | 4.56713  | -0.51269 | -0.97546 |
| C  | 3.121858 | -2.7351  | -0.16601 |
| H  | 2.545888 | -3.33193 | 0.561806 |
| H  | 2.940228 | -3.15605 | -1.16861 |
| H  | 4.197206 | -2.85202 | 0.055479 |
| C  | -3.07806 | -0.76128 | 1.323295 |
| H  | -2.84217 | 0.303966 | 1.469539 |
| H  | -4.15848 | -0.89499 | 1.503116 |
| H  | -2.52674 | -1.33099 | 2.090866 |
| C  | -3.47622 | -0.45137 | -1.14375 |
| H  | -3.26829 | -0.83536 | -2.15706 |
| H  | -4.56547 | -0.51754 | -0.97485 |
| H  | -3.18387 | 0.611314 | -1.12695 |
| C  | -3.11785 | -2.7396  | -0.1666  |
| H  | -2.54122 | -3.33609 | 0.560979 |
| H  | -4.19307 | -2.8578  | 0.054842 |
| H  | -2.93577 | -3.15995 | -1.16936 |

1.3acl

|    |          |          |          |
|----|----------|----------|----------|
| C  | -0.73742 | -1.47604 | -1.53665 |
| C  | 0.73770  | -1.47591 | -1.53665 |
| H  | -1.28832 | -1.83613 | -2.41466 |
| H  | 1.28866  | -1.83592 | -2.41466 |
| Be | 0.00003  | -0.29378 | 0.58409  |
| C  | 2.74210  | -1.00614 | -0.24664 |
| C  | -2.74191 | -1.00657 | -0.24665 |
| N  | -1.28613 | -1.03322 | -0.47539 |
| N  | 1.28633  | -1.03300 | -0.47539 |
| C  | -0.00014 | 1.43925  | 0.18620  |
| C  | -0.00019 | 1.93240  | -1.12725 |
| C  | -0.00024 | 2.40076  | 1.21116  |
| H  | -0.00012 | 1.23074  | -1.97654 |
| H  | -0.00021 | 2.06530  | 2.25526  |
| C  | -0.00031 | 3.29879  | -1.41929 |
| C  | -0.00036 | 3.77188  | 0.94141  |
| H  | -0.00034 | 3.64220  | -2.45961 |
| H  | -0.00043 | 4.49239  | 1.76631  |
| C  | -0.00040 | 4.22725  | -0.37773 |
| H  | -0.00050 | 5.30054  | -0.59304 |
| Cl | 0.00008  | -0.94028 | 2.45594  |
| C  | 3.08452  | 0.32205  | 0.44008  |
| H  | 2.83629  | 1.17940  | -0.20621 |
| H  | 2.52163  | 0.43190  | 1.38051  |
| H  | 4.16354  | 0.34575  | 0.66856  |
| C  | 3.54599  | -1.14780 | -1.54206 |
| H  | 3.41148  | -2.13454 | -2.01889 |
| H  | 3.278775 | -0.359   | -2.26723 |
| H  | 4.619244 | -1.04394 | -1.31411 |
| C  | 3.035683 | -2.18008 | 0.702999 |
| H  | 2.432743 | -2.09164 | 1.621246 |
| H  | 2.799534 | -3.1433  | 0.217664 |
| H  | 4.105988 | -2.17774 | 0.971112 |
| C  | -3.08449 | 0.321586 | 0.44004  |
| H  | -2.83642 | 1.17895  | -0.20629 |
| H  | -4.16351 | 0.345135 | 0.668566 |
| H  | -2.52157 | 0.431552 | 1.380439 |
| C  | -3.54579 | -1.14837 | -1.54205 |
| H  | -3.41116 | -2.13511 | -2.01886 |
| H  | -4.61905 | -1.04464 | -1.3141  |
| H  | -3.27868 | -0.35956 | -2.26725 |
| C  | -3.03532 | -2.18053 | 0.703025 |
| H  | -2.43237 | -2.09199 | 1.621261 |
| H  | -4.10562 | -2.17832 | 0.971157 |
| H  | -2.79905 | -3.14373 | 0.217711 |

1.4acl



|    |          |          |          |
|----|----------|----------|----------|
| C  | -1.08130 | -0.79491 | -1.68666 |
| C  | 0.29251  | -1.05843 | -1.72013 |
| H  | -1.67664 | -0.76044 | -2.60501 |
| H  | 0.85803  | -1.15602 | -2.64764 |
| Be | -0.34097 | -0.61696 | 0.59961  |
| C  | 2.25983  | -1.49556 | -0.32884 |
| C  | -2.98297 | -0.12879 | -0.25505 |
| N  | -1.58283 | -0.50676 | -0.50056 |
| N  | 0.88053  | -0.96076 | -0.50274 |
| C  | 0.82167  | 1.01933  | 0.02281  |
| C  | 0.75992  | 1.75391  | -1.14500 |
| C  | 1.15527  | 1.63119  | 1.23106  |
| H  | 0.52605  | 1.24313  | -2.09067 |
| H  | 1.20123  | 1.06282  | 2.16343  |
| C  | 0.98713  | 3.12974  | -1.12520 |
| C  | 1.38043  | 3.01190  | 1.25352  |
| H  | 0.93314  | 3.70813  | -2.05269 |
| H  | 1.61703  | 3.50091  | 2.20337  |
| C  | 1.29794  | 3.76127  | 0.08079  |
| H  | 1.48374  | 4.83894  | 0.10424  |
| Cl | -0.47538 | -1.08235 | 2.47171  |
| C  | 2.84911  | -1.09010 | 1.02445  |
| H  | 3.13433  | -0.02725 | 1.03932  |
| H  | 2.13843  | -1.28300 | 1.84384  |
| H  | 3.75985  | -1.68429 | 1.20817  |
| C  | 3.19821  | -1.02019 | -1.44474 |
| H  | 2.93752  | -1.44126 | -2.42984 |
| H  | 3.188726 | 0.081238 | -1.51542 |
| H  | 4.228763 | -1.34051 | -1.21735 |
| C  | 2.103701 | -3.02607 | -0.35724 |
| H  | 1.429579 | -3.35326 | 0.452378 |
| H  | 1.684728 | -3.36733 | -1.31822 |
| H  | 3.086534 | -3.50669 | -0.21331 |
| C  | -2.95734 | 1.129913 | 0.625671 |
| H  | -2.44187 | 1.955398 | 0.104735 |
| H  | -3.98454 | 1.451866 | 0.870053 |
| H  | -2.42261 | 0.931428 | 1.569746 |
| C  | -3.74796 | 0.173209 | -1.54758 |
| H  | -3.84615 | -0.71826 | -2.19132 |
| H  | -4.76842 | 0.508521 | -1.29809 |
| H  | -3.2618  | 0.978208 | -2.12668 |
| C  | -3.66137 | -1.28688 | 0.492135 |
| H  | -3.12427 | -1.5088  | 1.428705 |
| H  | -4.70795 | -1.03192 | 0.734994 |
| H  | -3.66066 | -2.19842 | -0.13107 |

1.5acl

|    |          |          |          |
|----|----------|----------|----------|
| C  | -0.00145 | 0.28100  | -1.72053 |
| C  | -1.27906 | -0.13834 | -1.62418 |
| H  | 0.53257  | 0.41353  | -2.65837 |
| H  | -1.84695 | -0.36502 | -2.53421 |
| Be | -0.78013 | 0.24228  | 0.66242  |
| C  | -3.24345 | -0.74314 | -0.29529 |
| C  | 1.21841  | 1.94665  | -0.31615 |
| N  | 0.67067  | 0.51051  | -0.43911 |
| N  | -1.85603 | -0.26954 | -0.39246 |
| C  | 1.68964  | -0.52240 | -0.19328 |
| C  | 2.48257  | -1.01871 | -1.23440 |
| C  | 1.87599  | -1.02989 | 1.09528  |
| H  | 2.34567  | -0.65788 | -2.25381 |
| H  | 1.26904  | -0.65857 | 1.92362  |
| C  | 3.44893  | -1.99061 | -0.98670 |
| C  | 2.83971  | -2.00874 | 1.33842  |
| H  | 4.05875  | -2.36333 | -1.81449 |
| H  | 2.96287  | -2.39519 | 2.35389  |
| C  | 3.63307  | -2.49161 | 0.30143  |
| H  | 4.38797  | -3.25916 | 0.49289  |
| Cl | -0.83469 | 0.65075  | 2.54053  |
| C  | 2.01082  | 2.10674  | 0.98439  |
| H  | 2.27624  | 3.17078  | 1.10271  |
| H  | 1.41592  | 1.80647  | 1.86063  |
| H  | 2.94773  | 1.52657  | 0.96948  |
| C  | 0.01027  | 2.88999  | -0.30384 |
| H  | -0.57918 | 2.77086  | 0.62170  |
| H  | 0.357757 | 3.935779 | -0.3417  |
| H  | -0.64198 | 2.712189 | -1.17496 |
| C  | 2.135261 | 2.290223 | -1.4966  |
| H  | 2.57094  | 3.289405 | -1.3296  |
| H  | 2.972086 | 1.576956 | -1.58118 |
| H  | 1.592558 | 2.323818 | -2.45477 |
| C  | -3.62127 | -0.86134 | 1.183672 |
| H  | -2.94665 | -1.55882 | 1.708903 |
| H  | -3.55503 | 0.114661 | 1.691279 |
| H  | -4.65416 | -1.237   | 1.283622 |
| C  | -3.38353 | -2.12893 | -0.9489  |
| H  | -2.68426 | -2.84227 | -0.47959 |
| H  | -4.4105  | -2.5158  | -0.82859 |
| H  | -3.1659  | -2.10041 | -2.0308  |
| C  | -4.19567 | 0.259127 | -0.97047 |
| H  | -5.24611 | -0.06662 | -0.87191 |
| H  | -4.09311 | 1.252972 | -0.5014  |
| H  | -3.97996 | 0.367148 | -2.04807 |

1.1aBr

|    |          |          |          |
|----|----------|----------|----------|
| C  | -1.93123 | 1.38500  | 1.21678  |
| C  | -0.81496 | 2.14126  | 1.05880  |
| H  | -2.68509 | 1.57519  | 1.98482  |
| H  | -0.56902 | 2.98986  | 1.70194  |
| Be | -0.79525 | 0.55776  | -0.60582 |
| C  | 1.25038  | 2.49436  | -0.24964 |
| C  | -3.28652 | -0.46583 | 0.29417  |
| N  | -2.07580 | 0.34716  | 0.28432  |
| N  | -0.00175 | 1.78058  | -0.02137 |
| C  | 1.42861  | -1.46740 | -0.10443 |
| C  | 0.87237  | -1.33725 | 1.16315  |
| C  | 2.77947  | -1.71706 | -0.31330 |
| H  | -0.18837 | -1.09736 | 1.28818  |
| H  | 3.18833  | -1.80150 | -1.32292 |
| C  | 1.71677  | -1.46804 | 2.26445  |
| C  | 3.60695  | -1.84168 | 0.80396  |
| H  | 1.29964  | -1.35691 | 3.26854  |
| H  | 4.67439  | -2.03027 | 0.66153  |
| C  | 3.07822  | -1.71700 | 2.08820  |
| H  | 3.73430  | -1.80677 | 2.95809  |
| Br | 0.29718  | -1.22622 | -1.63860 |
| C  | 1.87341  | 2.00162  | -1.56046 |
| H  | 2.17398  | 0.94328  | -1.48528 |
| H  | 1.15574  | 2.10498  | -2.39420 |
| H  | 2.77648  | 2.58629  | -1.80747 |
| C  | 2.24019  | 2.22531  | 0.89956  |
| H  | 1.82589  | 2.56678  | 1.86392  |
| H  | 2.442339 | 1.143165 | 0.984813 |
| H  | 3.19901  | 2.749313 | 0.734552 |
| C  | 1.002189 | 4.008779 | -0.38048 |
| H  | 0.27897  | 4.205232 | -1.19079 |
| H  | 0.592346 | 4.43934  | 0.548336 |
| H  | 1.942215 | 4.542191 | -0.608   |
| C  | -3.16894 | -1.54331 | -0.78845 |
| H  | -2.33245 | -2.23086 | -0.57517 |
| H  | -4.09443 | -2.14182 | -0.84578 |
| H  | -3.00174 | -1.08331 | -1.78004 |
| C  | -3.46982 | -1.16379 | 1.654799 |
| H  | -3.58153 | -0.43236 | 2.472741 |
| H  | -4.36866 | -1.80583 | 1.652785 |
| H  | -2.59372 | -1.79631 | 1.883537 |
| C  | -4.51974 | 0.404724 | -0.01139 |
| H  | -4.39913 | 0.897095 | -0.99179 |
| H  | -5.44403 | -0.20063 | -0.03025 |
| H  | -4.64703 | 1.195599 | 0.747146 |

1.2aBr

|    |          |          |          |
|----|----------|----------|----------|
| C  | -0.68677 | -1.88387 | -1.46293 |
| C  | 0.68865  | -1.88320 | -1.46295 |
| H  | -1.27685 | -2.37115 | -2.24363 |
| H  | 1.27918  | -2.36994 | -2.24364 |
| Be | 0.00030  | -0.53899 | 0.32130  |
| C  | 2.71712  | -1.34222 | -0.22429 |
| C  | -2.71572 | -1.34468 | -0.22422 |
| N  | -1.26461 | -1.23268 | -0.40917 |
| N  | 1.26591  | -1.23142 | -0.40922 |
| C  | -0.00093 | 1.59690  | 0.05353  |
| C  | -1.21509 | 2.14415  | -0.37018 |
| C  | 1.21259  | 2.14478  | -0.37119 |
| H  | -2.16164 | 1.77178  | 0.02031  |
| H  | 2.15966  | 1.77286  | 0.01846  |
| C  | -1.20662 | 3.15370  | -1.32939 |
| C  | 1.20279  | 3.15433  | -1.33039 |
| H  | -2.16003 | 3.55203  | -1.68905 |
| H  | 2.15569  | 3.55312  | -1.69085 |
| C  | -0.00225 | 3.65645  | -1.82443 |
| H  | -0.00276 | 4.45055  | -2.57542 |
| Br | -0.00017 | 0.80775  | 2.09824  |
| C  | 3.10931  | -0.72099 | 1.12033  |
| H  | 2.88259  | 0.35545  | 1.16766  |
| H  | 2.56780  | -1.21197 | 1.94701  |
| H  | 4.19192  | -0.84335 | 1.29539  |
| C  | 3.46644  | -0.63377 | -1.36734 |
| H  | 3.24610  | -1.10686 | -2.33942 |
| H  | 3.169591 | 0.425225 | -1.44102 |
| H  | 4.558252 | -0.68108 | -1.20875 |
| C  | 3.131537 | -2.82634 | -0.18248 |
| H  | 2.573085 | -3.35449 | 0.609424 |
| H  | 2.932245 | -3.33892 | -1.13793 |
| H  | 4.21154  | -2.91996 | 0.027173 |
| C  | -3.10823 | -0.72441 | 1.120753 |
| H  | -2.88179 | 0.352056 | 1.16876  |
| H  | -4.19081 | -0.84722 | 1.295685 |
| H  | -2.5666  | -1.21571 | 1.94716  |
| C  | -3.46559 | -0.63622 | -1.36689 |
| H  | -3.24475 | -1.10858 | -2.33921 |
| H  | -4.55737 | -0.68459 | -1.2084  |
| H  | -3.16967 | 0.423076 | -1.43994 |
| C  | -3.12909 | -2.82911 | -0.1831  |
| H  | -2.57003 | -3.35732 | 0.608335 |
| H  | -4.20896 | -2.92356 | 0.026851 |
| H  | -2.92979 | -3.34104 | -1.13889 |

1.3aBr

|    |          |          |          |
|----|----------|----------|----------|
| C  | 0.73686  | -1.01549 | 2.03300  |
| C  | -0.73688 | -1.01546 | 2.03301  |
| H  | 1.28695  | -1.21642 | 2.96069  |
| H  | -1.28698 | -1.21638 | 2.96070  |
| Be | -0.00001 | -0.23791 | -0.26097 |
| C  | -2.74846 | -0.77250 | 0.69826  |
| C  | 2.74844  | -0.77258 | 0.69825  |
| N  | 1.28801  | -0.76353 | 0.91162  |
| N  | -1.28803 | -0.76349 | 0.91163  |
| C  | 0.00003  | 1.53728  | -0.21693 |
| C  | 0.00004  | 2.26777  | 0.98151  |
| C  | 0.00004  | 2.29046  | -1.40336 |
| H  | 0.00004  | 1.73875  | 1.94747  |
| H  | 0.00002  | 1.76833  | -2.36758 |
| C  | 0.00007  | 3.66468  | 1.01283  |
| C  | 0.00006  | 3.68794  | -1.39442 |
| H  | 0.00008  | 4.19596  | 1.97075  |
| H  | 0.00007  | 4.24026  | -2.34020 |
| C  | 0.00008  | 4.38189  | -0.18402 |
| H  | 0.00009  | 5.47652  | -0.17260 |
| Br | -0.00003 | -1.32353 | -2.11158 |
| C  | -3.09574 | 0.39044  | -0.23918 |
| H  | -2.84557 | 1.35993  | 0.22082  |
| H  | -2.54080 | 0.30987  | -1.18748 |
| H  | -4.17628 | 0.36754  | -0.46031 |
| C  | -3.53318 | -0.63796 | 2.00691  |
| H  | -3.40620 | -1.51083 | 2.67078  |
| H  | -3.24432 | 0.276379 | 2.554811 |
| H  | -4.60816 | -0.56417 | 1.775625 |
| C  | -3.06846 | -2.11415 | 0.017677 |
| H  | -2.50264 | -2.21753 | -0.92217 |
| H  | -2.8088  | -2.95904 | 0.679371 |
| H  | -4.148   | -2.16426 | -0.20449 |
| C  | 3.095748 | 0.390351 | -0.23919 |
| H  | 2.845592 | 1.359843 | 0.2208   |
| H  | 4.176284 | 0.367425 | -0.46032 |
| H  | 2.540808 | 0.30978  | -1.18749 |
| C  | 3.533155 | -0.63806 | 2.006898 |
| H  | 3.406157 | -1.51093 | 2.670767 |
| H  | 4.608145 | -0.5643  | 1.775615 |
| H  | 3.244322 | 0.27629  | 2.554797 |
| C  | 3.068404 | -2.11424 | 0.017671 |
| H  | 2.502589 | -2.21761 | -0.92218 |
| H  | 4.147948 | -2.16438 | -0.20449 |
| H  | 2.808719 | -2.95913 | 0.679366 |

1.4aBr

|    |          |          |          |
|----|----------|----------|----------|
| C  | 0.92987  | 0.17876  | 2.11258  |
| C  | -0.42179 | -0.17271 | 2.18110  |
| H  | 1.45340  | 0.59258  | 2.98040  |
| H  | -1.04383 | 0.02274  | 3.05527  |
| Be | 0.34441  | -0.54194 | -0.10786 |
| C  | -2.25556 | -1.25467 | 0.97726  |
| C  | 2.88731  | 0.45296  | 0.63392  |
| N  | 1.49783  | 0.06354  | 0.92650  |
| N  | -0.92937 | -0.57401 | 0.98960  |
| C  | -0.97449 | 1.07547  | -0.22242 |
| C  | -1.01412 | 2.18963  | 0.59347  |
| C  | -1.29974 | 1.17522  | -1.57535 |
| H  | -0.79014 | 2.08101  | 1.66473  |
| H  | -1.27295 | 0.30418  | -2.23475 |
| C  | -1.33135 | 3.44045  | 0.06529  |
| C  | -1.61632 | 2.42972  | -2.10792 |
| H  | -1.35506 | 4.32066  | 0.71522  |
| H  | -1.84619 | 2.51685  | -3.17413 |
| C  | -1.63194 | 3.56078  | -1.29311 |
| H  | -1.88723 | 4.53706  | -1.71497 |
| Br | 0.67835  | -1.75402 | -1.77942 |
| C  | -2.80003 | -1.40984 | -0.44473 |
| H  | -3.17144 | -0.45379 | -0.84411 |
| H  | -2.03500 | -1.81224 | -1.12751 |
| H  | -3.64624 | -2.11663 | -0.42345 |
| C  | -3.28953 | -0.49846 | 1.82121  |
| H  | -3.06686 | -0.52780 | 2.90051  |
| H  | -3.35638 | 0.555361 | 1.499748 |
| H  | -4.2805  | -0.96223 | 1.682884 |
| C  | -1.99275 | -2.65542 | 1.557667 |
| H  | -1.26164 | -3.19502 | 0.932058 |
| H  | -1.59502 | -2.59324 | 2.583998 |
| H  | -2.93199 | -3.23411 | 1.580155 |
| C  | 2.853821 | 1.314303 | -0.63756 |
| H  | 2.257438 | 2.227663 | -0.4691  |
| H  | 3.876273 | 1.60881  | -0.93138 |
| H  | 2.400941 | 0.757044 | -1.4749  |
| C  | 3.526168 | 1.258541 | 1.770229 |
| H  | 3.631103 | 0.665382 | 2.695336 |
| H  | 4.539474 | 1.571549 | 1.468244 |
| H  | 2.947346 | 2.171282 | 1.997664 |
| C  | 3.700535 | -0.82735 | 0.391114 |
| H  | 3.265465 | -1.41325 | -0.43452 |
| H  | 4.745936 | -0.57914 | 0.136658 |
| H  | 3.703375 | -1.45732 | 1.297964 |

1.5aBr

|    |          |          |          |
|----|----------|----------|----------|
| C  | 0.24219  | 1.46225  | 1.36256  |
| C  | -1.02865 | 1.73340  | 1.00785  |
| H  | 0.84459  | 2.09115  | 2.01347  |
| H  | -1.51727 | 2.63702  | 1.38983  |
| Be | -0.72321 | -0.35574 | -0.07207 |
| C  | -3.08172 | 1.20262  | -0.20489 |
| C  | 1.32849  | -0.73243 | 1.82934  |
| N  | 0.81057  | 0.25383  | 0.76134  |
| N  | -1.70055 | 0.87534  | 0.18148  |
| C  | 1.82878  | 0.60582  | -0.24283 |
| C  | 2.69214  | 1.69053  | -0.04893 |
| C  | 1.94491  | -0.14357 | -1.41608 |
| H  | 2.61363  | 2.30641  | 0.84681  |
| H  | 1.28545  | -0.99614 | -1.58998 |
| C  | 3.65549  | 2.00795  | -1.00346 |
| C  | 2.90509  | 0.18186  | -2.37403 |
| H  | 4.32088  | 2.85848  | -0.83046 |
| H  | 2.97060  | -0.41583 | -3.28729 |
| C  | 3.76721  | 1.25599  | -2.17231 |
| H  | 4.51943  | 1.51162  | -2.92346 |
| Br | -0.98373 | -2.23032 | -0.93112 |
| C  | 2.03756  | -1.91695 | 1.16768  |
| H  | 2.28886  | -2.65360 | 1.94908  |
| H  | 1.39476  | -2.41658 | 0.42695  |
| H  | 2.97687  | -1.61137 | 0.67939  |
| C  | 0.10999  | -1.22704 | 2.61630  |
| H  | -0.54703 | -1.85449 | 1.98920  |
| H  | 0.444636 | -1.8466  | 3.464795 |
| H  | -0.47352 | -0.38145 | 3.016833 |
| C  | 2.314243 | -0.04546 | 2.783443 |
| H  | 2.716723 | -0.79974 | 3.479898 |
| H  | 3.169703 | 0.391518 | 2.241977 |
| H  | 1.833453 | 0.737976 | 3.390565 |
| C  | -3.59975 | 0.135893 | -1.1724  |
| H  | -2.9602  | 0.070692 | -2.06923 |
| H  | -3.61835 | -0.85914 | -0.69897 |
| H  | -4.62519 | 0.3852   | -1.49532 |
| C  | -3.12748 | 2.566447 | -0.91661 |
| H  | -2.46411 | 2.557102 | -1.79867 |
| H  | -4.15357 | 2.795431 | -1.2534  |
| H  | -2.80485 | 3.390397 | -0.25674 |
| C  | -3.98826 | 1.223573 | 1.038252 |
| H  | -5.03593 | 1.432818 | 0.759371 |
| H  | -3.95211 | 0.245986 | 1.54921  |
| H  | -3.67568 | 1.997769 | 1.760769 |

1.1al

|    |          |          |          |
|----|----------|----------|----------|
| C  | -1.94986 | 1.69231  | 1.07720  |
| C  | -0.84100 | 2.40233  | 0.74710  |
| H  | -2.66627 | 2.01329  | 1.83732  |
| H  | -0.56921 | 3.34500  | 1.22835  |
| Be | -0.88460 | 0.55187  | -0.61582 |
| C  | 1.13946  | 2.55833  | -0.70727 |
| C  | -3.36269 | -0.25412 | 0.53301  |
| N  | -2.13678 | 0.51411  | 0.34194  |
| N  | -0.07128 | 1.85917  | -0.28589 |
| C  | 1.51757  | -1.26094 | 0.44088  |
| C  | 0.90853  | -0.79249 | 1.60222  |
| C  | 2.89009  | -1.47412 | 0.35493  |
| H  | -0.16736 | -0.59274 | 1.63592  |
| H  | 3.35229  | -1.83058 | -0.56894 |
| C  | 1.71139  | -0.53543 | 2.71278  |
| C  | 3.67657  | -1.20815 | 1.47770  |
| H  | 1.24751  | -0.15462 | 3.62625  |
| H  | 4.75758  | -1.36389 | 1.42362  |
| C  | 3.09018  | -0.73955 | 2.65248  |
| H  | 3.71305  | -0.52407 | 3.52490  |
| I  | 0.31498  | -1.56664 | -1.28539 |
| C  | 1.76588  | 1.82063  | -1.89505 |
| H  | 2.14491  | 0.82932  | -1.59464 |
| H  | 1.02655  | 1.68542  | -2.70526 |
| H  | 2.61883  | 2.39212  | -2.29980 |
| C  | 2.16905  | 2.59874  | 0.43781  |
| H  | 1.76637  | 3.12757  | 1.31855  |
| H  | 2.431254 | 1.573406 | 0.7518   |
| H  | 3.093207 | 3.116386 | 0.123352 |
| C  | 0.803597 | 3.992292 | -1.15948 |
| H  | 0.060758 | 3.966416 | -1.97537 |
| H  | 0.378005 | 4.590363 | -0.33663 |
| H  | 1.707737 | 4.51426  | -1.52024 |
| C  | -3.33523 | -1.48374 | -0.3802  |
| H  | -2.51953 | -2.17055 | -0.097   |
| H  | -4.28548 | -2.04053 | -0.31073 |
| H  | -3.19352 | -1.18422 | -1.43527 |
| C  | -3.48457 | -0.73866 | 1.989788 |
| H  | -3.52528 | 0.107361 | 2.696418 |
| H  | -4.40026 | -1.33953 | 2.13249  |
| H  | -2.61434 | -1.36324 | 2.259165 |
| C  | -4.59123 | 0.598691 | 0.16365  |
| H  | -4.51179 | 0.938084 | -0.88362 |
| H  | -5.52747 | 0.023699 | 0.279676 |
| H  | -4.66303 | 1.495749 | 0.801221 |

1.2al



|    |          |          |          |
|----|----------|----------|----------|
| C  | -0.68540 | 2.35229  | 1.16427  |
| C  | 0.68592  | 2.35212  | 1.16433  |
| H  | -1.27426 | 3.03455  | 1.78229  |
| H  | 1.27490  | 3.03426  | 1.78238  |
| Be | 0.00013  | 0.59179  | -0.20263 |
| C  | 2.72707  | 1.50236  | 0.14767  |
| C  | -2.72666 | 1.50307  | 0.14746  |
| N  | -1.27120 | 1.43940  | 0.32423  |
| N  | 1.27157  | 1.43910  | 0.32432  |
| C  | -0.00023 | -1.47478 | 0.49484  |
| C  | -1.21193 | -1.86697 | 1.07413  |
| C  | 1.21123  | -1.86704 | 1.07458  |
| H  | -2.16232 | -1.62713 | 0.59729  |
| H  | 2.16181  | -1.62725 | 0.59811  |
| C  | -1.20521 | -2.54438 | 2.29075  |
| C  | 1.20401  | -2.54445 | 2.29120  |
| H  | -2.15866 | -2.81443 | 2.75399  |
| H  | 2.15727  | -2.81454 | 2.75480  |
| C  | -0.00073 | -2.87720 | 2.91166  |
| H  | -0.00093 | -3.41023 | 3.86607  |
| I  | -0.00002 | -1.25282 | -1.84364 |
| C  | 3.15250  | 0.57642  | -0.99585 |
| H  | 2.91785  | -0.47949 | -0.78936 |
| H  | 2.64268  | 0.85700  | -1.93304 |
| H  | 4.24133  | 0.64891  | -1.15965 |
| C  | 3.44573  | 1.08887  | 1.44526  |
| H  | 3.19108  | 1.77238  | 2.27307  |
| H  | 3.149783 | 0.072478 | 1.753599 |
| H  | 4.54199  | 1.109622 | 1.312632 |
| C  | 3.156597 | 2.930705 | -0.24374 |
| H  | 2.614079 | 3.254879 | -1.14841 |
| H  | 2.950769 | 3.661838 | 0.554913 |
| H  | 4.240274 | 2.963385 | -0.45297 |
| C  | -3.15227 | 0.577282 | -0.99612 |
| H  | -2.91815 | -0.47872 | -0.78953 |
| H  | -4.24102 | 0.650278 | -1.16016 |
| H  | -2.64212 | 0.857622 | -1.93321 |
| C  | -3.4455  | 1.08971  | 1.445001 |
| H  | -3.19117 | 1.773465 | 2.272698 |
| H  | -4.54174 | 1.110183 | 1.312152 |
| H  | -3.14936 | 0.073458 | 1.753615 |
| C  | -3.15576 | 2.931556 | -0.24388 |
| H  | -2.61309 | 3.255634 | -1.14849 |
| H  | -4.23941 | 2.964585 | -0.45318 |
| H  | -2.94976 | 3.662574 | 0.554831 |

1.3al

|    |          |          |          |
|----|----------|----------|----------|
| C  | 0.74239  | -0.07049 | 2.42798  |
| C  | -0.72868 | -0.10425 | 2.43058  |
| H  | 1.29061  | 0.03499  | 3.37220  |
| H  | -1.27816 | -0.02299 | 3.37649  |
| Be | 0.00196  | -0.07614 | 0.01178  |
| C  | -2.74800 | -0.29474 | 1.10558  |
| C  | 2.76390  | -0.16849 | 1.09657  |
| N  | 1.29668  | -0.15396 | 1.28229  |
| N  | -1.28249 | -0.21364 | 1.28686  |
| C  | -0.03822 | 1.59625  | -0.57018 |
| C  | -0.05775 | 2.68218  | 0.32023  |
| C  | -0.05356 | 1.91517  | -1.93848 |
| H  | -0.04677 | 2.50159  | 1.40629  |
| H  | -0.03935 | 1.10601  | -2.67795 |
| C  | -0.09110 | 4.01039  | -0.11164 |
| C  | -0.08714 | 3.23685  | -2.39120 |
| H  | -0.10540 | 4.82775  | 0.61732  |
| H  | -0.09892 | 3.44518  | -3.46631 |
| C  | -0.10619 | 4.29154  | -1.47813 |
| H  | -0.13294 | 5.32790  | -1.82961 |
| I  | 0.04268  | -1.93191 | -1.48709 |
| C  | -3.10453 | 0.41107  | -0.20756 |
| H  | -2.85713 | 1.48383  | -0.16206 |
| H  | -2.55592 | -0.03000 | -1.05511 |
| H  | -4.18581 | 0.30112  | -0.39578 |
| C  | -3.51132 | 0.35817  | 2.26351  |
| H  | -3.39469 | -0.18749 | 3.21583  |
| H  | -3.19447 | 1.406043 | 2.407709 |
| H  | -4.58777 | 0.360914 | 2.027114 |
| C  | -3.0892  | -1.7914  | 1.016319 |
| H  | -2.53533 | -2.26887 | 0.19191  |
| H  | -2.83273 | -2.30788 | 1.957971 |
| H  | -4.17103 | -1.91131 | 0.836626 |
| C  | 3.084653 | 0.546311 | -0.22087 |
| H  | 2.791311 | 1.607543 | -0.17893 |
| H  | 4.169114 | 0.482978 | -0.41224 |
| H  | 2.553616 | 0.077832 | -1.0649  |
| C  | 3.499445 | 0.524577 | 2.249307 |
| H  | 3.415402 | -0.02422 | 3.203257 |
| H  | 4.5731   | 0.582061 | 2.007446 |
| H  | 3.129683 | 1.555076 | 2.392955 |
| C  | 3.172718 | -1.64854 | 1.013374 |
| H  | 2.639334 | -2.15431 | 0.192277 |
| H  | 4.258499 | -1.72036 | 0.831797 |
| H  | 2.941908 | -2.17177 | 1.957958 |

## 1.4al

|    |          |          |          |
|----|----------|----------|----------|
| C  | 0.34120  | 1.37794  | 2.04255  |
| C  | -0.86338 | 0.68235  | 2.16338  |
| H  | 0.59307  | 2.19469  | 2.72630  |
| H  | -1.64127 | 0.96487  | 2.87280  |
| Be | 0.32585  | -0.18654 | 0.22016  |
| C  | -2.14937 | -1.23274 | 1.35577  |
| C  | 2.35291  | 1.75390  | 0.67070  |
| N  | 1.10096  | 1.05410  | 1.01107  |
| N  | -1.06028 | -0.22759 | 1.17531  |
| C  | -1.33580 | 0.81804  | -0.55309 |
| C  | -1.76513 | 2.08740  | -0.21509 |
| C  | -1.47679 | 0.34636  | -1.85852 |
| H  | -1.67879 | 2.42508  | 0.82801  |
| H  | -1.14771 | -0.65569 | -2.14355 |
| C  | -2.29564 | 2.93524  | -1.18603 |
| C  | -2.00818 | 1.19607  | -2.83495 |
| H  | -2.62666 | 3.94229  | -0.91442 |
| H  | -2.09792 | 0.83732  | -3.86470 |
| C  | -2.41511 | 2.48715  | -2.50346 |
| H  | -2.83569 | 3.14416  | -3.27013 |
| I  | 1.35394  | -1.93666 | -0.90393 |
| C  | -2.45729 | -1.98618 | 0.06003  |
| H  | -3.00923 | -1.35618 | -0.65357 |
| H  | -1.54036 | -2.36062 | -0.42092 |
| H  | -3.09187 | -2.85515 | 0.30166  |
| C  | -3.44461 | -0.57989 | 1.85632  |
| H  | -3.36327 | -0.19774 | 2.88694  |
| H  | -3.74242 | 0.24931  | 1.191034 |
| H  | -4.25339 | -1.32923 | 1.851944 |
| C  | -1.6027  | -2.23218 | 2.38993  |
| H  | -0.68081 | -2.70564 | 2.011871 |
| H  | -1.37228 | -1.7306  | 3.344268 |
| H  | -2.35116 | -3.02023 | 2.580571 |
| C  | 2.325107 | 2.017013 | -0.84218 |
| H  | 1.462607 | 2.652642 | -1.10804 |
| H  | 3.25092  | 2.525332 | -1.16242 |
| H  | 2.241942 | 1.071492 | -1.40361 |
| C  | 2.494799 | 3.092931 | 1.40446  |
| H  | 2.604161 | 2.963648 | 2.495168 |
| H  | 3.402632 | 3.606451 | 1.047078 |
| H  | 1.633548 | 3.755834 | 1.20835  |
| C  | 3.533845 | 0.842925 | 1.036985 |
| H  | 3.462678 | -0.12167 | 0.50911  |
| H  | 4.490245 | 1.323051 | 0.765482 |
| H  | 3.540905 | 0.642252 | 2.122673 |

1.5al

|    |          |          |          |
|----|----------|----------|----------|
| C  | 0.68572  | 1.80735  | 1.22215  |
| C  | -0.54168 | 2.22610  | 0.86305  |
| H  | 1.39953  | 2.40986  | 1.77807  |
| H  | -0.86897 | 3.23643  | 1.13317  |
| Be | -0.62462 | -0.01735 | 0.10559  |
| C  | -2.67159 | 1.91818  | -0.28121 |
| C  | 1.55674  | -0.40849 | 1.93157  |
| N  | 1.04444  | 0.46260  | 0.76545  |
| N  | -1.37352 | 1.38817  | 0.17009  |
| C  | 1.99233  | 0.53485  | -0.36175 |
| C  | 2.93081  | 1.56903  | -0.45312 |
| C  | 1.96230  | -0.43458 | -1.36756 |
| H  | 2.96353  | 2.35111  | 0.30482  |
| H  | 1.24051  | -1.25165 | -1.32302 |
| C  | 3.82454  | 1.62185  | -1.52026 |
| C  | 2.85287  | -0.37478 | -2.43900 |
| H  | 4.55153  | 2.43734  | -1.56961 |
| H  | 2.80319  | -1.14236 | -3.21591 |
| C  | 3.79080  | 0.65071  | -2.51987 |
| H  | 4.49003  | 0.69746  | -3.35918 |
| I  | -1.34372 | -2.14621 | -0.42448 |
| C  | 2.04766  | -1.76812 | 1.42689  |
| H  | 2.28952  | -2.39539 | 2.30116  |
| H  | 1.27864  | -2.29432 | 0.84175  |
| H  | 2.96133  | -1.67587 | 0.81812  |
| C  | 0.38677  | -0.60530 | 2.90023  |
| H  | -0.41144 | -1.21887 | 2.44818  |
| H  | 0.739626 | -1.13288 | 3.801842 |
| H  | -0.03956 | 0.362355 | 3.212711 |
| C  | 2.721408 | 0.280968 | 2.65629  |
| H  | 3.135878 | -0.41729 | 3.40215  |
| H  | 3.535679 | 0.540935 | 1.95934  |
| H  | 2.406951 | 1.18744  | 3.197039 |
| C  | -3.41102 | 0.846379 | -1.08408 |
| H  | -2.8065  | 0.505984 | -1.9423  |
| H  | -3.64445 | -0.03369 | -0.46327 |
| H  | -4.3596  | 1.255882 | -1.47203 |
| C  | -2.45218 | 3.138357 | -1.19381 |
| H  | -1.82135 | 2.858938 | -2.05533 |
| H  | -3.41577 | 3.518649 | -1.57562 |
| H  | -1.95561 | 3.970309 | -0.66491 |
| C  | -3.53706 | 2.309478 | 0.929326 |
| H  | -4.52681 | 2.673019 | 0.601778 |

|   |          |          |          |
|---|----------|----------|----------|
| H | -3.68589 | 1.435834 | 1.586955 |
| H | -3.07117 | 3.112087 | 1.527312 |

#### 2.1aF

|    |          |          |          |
|----|----------|----------|----------|
| C  | -2.96991 | 1.11650  | 0.30377  |
| C  | -3.30140 | -0.17025 | 0.58564  |
| H  | -3.58769 | 1.99012  | 0.53323  |
| H  | -4.22499 | -0.48590 | 1.08068  |
| Be | -1.26666 | -0.21891 | -0.48186 |
| C  | -2.59627 | -2.50774 | 0.44319  |
| H  | -2.72254 | -2.71588 | 1.52596  |
| H  | -3.50576 | -2.88321 | -0.07036 |
| H  | -1.74667 | -3.11717 | 0.08938  |
| C  | -1.30709 | 2.57431  | -0.74591 |
| H  | -1.98028 | 3.02372  | -1.50535 |
| H  | -1.25492 | 3.28758  | 0.10396  |
| H  | -0.29968 | 2.52527  | -1.19710 |
| N  | -1.73063 | 1.26501  | -0.33822 |
| N  | -2.35097 | -1.11785 | 0.18013  |
| C  | 1.49342  | -0.35631 | -0.40921 |
| C  | 2.62503  | -0.99596 | -0.87623 |
| C  | 1.47521  | 0.57254  | 0.61284  |
| H  | 2.55741  | -1.72147 | -1.68925 |
| H  | 0.53134  | 1.03532  | 0.92039  |
| C  | 3.83585  | -0.67418 | -0.26188 |
| C  | 2.69974  | 0.87544  | 1.21108  |
| H  | 4.75499  | -1.15874 | -0.60120 |
| H  | 2.72884  | 1.60541  | 2.02396  |
| C  | 3.87315  | 0.25696  | 0.77755  |
| H  | 4.82574  | 0.50139  | 1.25426  |
| F  | 0.28840  | -0.68764 | -1.03106 |

#### 2.2aF

|    |         |          |          |
|----|---------|----------|----------|
| C  | 2.37695 | 0.74387  | -1.04436 |
| C  | 2.42762 | -0.63582 | -1.03472 |
| H  | 2.81270 | 1.37413  | -1.82628 |
| H  | 2.91224 | -1.24250 | -1.80654 |
| Be | 1.08823 | 0.01737  | 0.78663  |
| C  | 1.66066 | -2.63303 | 0.11252  |
| H  | 0.86904 | -3.02417 | -0.56386 |
| H  | 2.60409 | -3.14516 | -0.15423 |
| H  | 1.39707 | -2.92689 | 1.14226  |
| C  | 1.46343 | 2.69508  | 0.07207  |
| H  | 2.34896 | 3.27083  | -0.25590 |

|   |          |          |          |
|---|----------|----------|----------|
| H | 0.60994  | 3.00455  | -0.57068 |
| H | 1.22959  | 2.99613  | 1.10704  |
| N | 1.69592  | 1.28096  | 0.00772  |
| N | 1.78493  | -1.20642 | 0.02331  |
| C | -0.95377 | -0.02080 | 0.48051  |
| C | -1.60019 | 1.19043  | 0.26941  |
| C | -1.51656 | -1.25598 | 0.18425  |
| H | -1.16361 | 2.13523  | 0.59749  |
| H | -1.01399 | -2.19050 | 0.43934  |
| C | -2.81527 | 1.15684  | -0.41449 |
| C | -2.73315 | -1.25658 | -0.49817 |
| H | -3.32622 | 2.09924  | -0.63324 |
| H | -3.17905 | -2.21359 | -0.78513 |
| C | -3.38143 | -0.05834 | -0.80715 |
| H | -4.33858 | -0.07279 | -1.33438 |
| F | -0.00566 | -0.02331 | 1.92902  |

### 2.3aF

|    |          |          |          |
|----|----------|----------|----------|
| C  | 2.24944  | 0.73984  | -1.10299 |
| C  | 2.24950  | -0.73986 | -1.10291 |
| H  | 2.71481  | 1.31103  | -1.92107 |
| H  | 2.71492  | -1.31110 | -1.92093 |
| Be | 0.76810  | 0.00004  | 0.90931  |
| C  | 1.48177  | -2.69634 | 0.03321  |
| H  | 1.97533  | -3.27515 | -0.76810 |
| H  | 1.88678  | -2.98525 | 1.01693  |
| H  | 0.40022  | -2.91157 | 0.04460  |
| C  | 1.48160  | 2.69639  | 0.03295  |
| H  | 1.97506  | 3.27515  | -0.76847 |
| H  | 0.40004  | 2.91154  | 0.04439  |
| H  | 1.88666  | 2.98544  | 1.01660  |
| N  | 1.64339  | 1.27666  | -0.12335 |
| N  | 1.64346  | -1.27661 | -0.12322 |
| C  | -0.89397 | -0.00001 | 0.28412  |
| C  | -1.96092 | 0.00010  | 1.20196  |
| C  | -1.24927 | -0.00015 | -1.07465 |
| H  | -1.74032 | 0.00021  | 2.27621  |
| H  | -0.46261 | -0.00024 | -1.84615 |
| C  | -3.29680 | 0.00007  | 0.79084  |
| C  | -2.57785 | -0.00018 | -1.50787 |
| H  | -4.09974 | 0.00016  | 1.53579  |
| H  | -2.81038 | -0.00030 | -2.57852 |
| C  | -3.61003 | -0.00007 | -0.56892 |
| H  | -4.65475 | -0.00010 | -0.89652 |
| F  | 1.16588  | 0.00011  | 2.32661  |

## 2.4aF

|    |          |          |          |
|----|----------|----------|----------|
| C  | 1.52292  | 0.58350  | -1.55073 |
| C  | 2.13690  | -0.60039 | -1.10121 |
| H  | 1.38351  | 0.84508  | -2.60381 |
| H  | 2.64569  | -1.29942 | -1.77859 |
| Be | 1.09413  | 0.36779  | 0.89029  |
| C  | 2.52023  | -2.06091 | 0.78261  |
| H  | 3.10255  | -2.66226 | 0.06142  |
| H  | 3.16983  | -1.79972 | 1.63511  |
| H  | 1.69355  | -2.68084 | 1.17099  |
| C  | 0.31388  | 2.53780  | -0.79812 |
| H  | -0.30303 | 2.54792  | -1.71411 |
| H  | -0.30724 | 2.82824  | 0.06037  |
| H  | 1.13122  | 3.27138  | -0.90275 |
| N  | 0.90223  | 1.23577  | -0.55586 |
| N  | 1.99293  | -0.86086 | 0.18000  |
| C  | -0.73784 | 0.10125  | 0.03853  |
| C  | -1.65195 | 0.50468  | 1.00906  |
| C  | -1.11617 | -0.72632 | -1.00028 |
| H  | -1.34585 | 1.15989  | 1.83092  |
| H  | -0.38585 | -0.98187 | -1.78399 |
| C  | -2.96369 | 0.02092  | 0.94387  |
| C  | -2.41913 | -1.22059 | -1.05959 |
| H  | -3.68884 | 0.31889  | 1.70746  |
| H  | -2.71952 | -1.88953 | -1.87209 |
| C  | -3.34557 | -0.84075 | -0.08438 |
| H  | -4.37330 | -1.21232 | -0.13397 |
| F  | 1.08857  | 0.85155  | 2.25716  |

## 2.5aF

|    |          |          |          |
|----|----------|----------|----------|
| C  | 1.07457  | -1.33024 | 0.92636  |
| C  | 2.16036  | -1.33109 | 0.11849  |
| H  | 0.75442  | -2.13487 | 1.59042  |
| H  | 2.81373  | -2.21051 | 0.04299  |
| Be | 1.40189  | 0.91826  | -0.19170 |
| C  | 3.58440  | -0.20216 | -1.48870 |
| H  | 4.53481  | -0.41036 | -0.95775 |
| H  | 3.48443  | -0.94407 | -2.30573 |
| H  | 3.67813  | 0.79169  | -1.95457 |
| C  | 0.30783  | 0.54724  | 2.25134  |
| H  | 1.34261  | 0.63401  | 2.61729  |
| H  | -0.13881 | 1.55091  | 2.19970  |
| H  | -0.27676 | -0.07967 | 2.94836  |

|   |          |          |          |
|---|----------|----------|----------|
| N | 0.34094  | -0.07260 | 0.90722  |
| N | 2.44679  | -0.20955 | -0.60152 |
| C | -0.98588 | -0.12716 | 0.29519  |
| C | -1.58105 | -1.34101 | -0.04975 |
| C | -1.65937 | 1.07210  | 0.03246  |
| H | -1.04989 | -2.27725 | 0.12541  |
| H | -1.17882 | 2.02831  | 0.25139  |
| C | -2.84674 | -1.35530 | -0.63760 |
| C | -2.92299 | 1.04830  | -0.55114 |
| H | -3.30269 | -2.31320 | -0.90351 |
| H | -3.43441 | 1.99277  | -0.75660 |
| C | -3.52545 | -0.16483 | -0.88507 |
| H | -4.51637 | -0.18024 | -1.34693 |
| F | 1.17043  | 2.32883  | -0.33255 |

#### 2.1aCl

|    |          |          |          |
|----|----------|----------|----------|
| C  | 2.99331  | 1.16044  | -0.48213 |
| C  | 3.23876  | -0.09331 | -0.94880 |
| H  | 3.56843  | 2.05376  | -0.74431 |
| H  | 4.03950  | -0.35732 | -1.64654 |
| Be | 1.45445  | -0.25210 | 0.49884  |
| C  | 2.51876  | -2.42984 | -0.90565 |
| H  | 2.39654  | -2.52445 | -2.00430 |
| H  | 3.50946  | -2.85662 | -0.64668 |
| H  | 1.75289  | -3.06917 | -0.43398 |
| C  | 1.58184  | 2.50167  | 1.00316  |
| H  | 2.38393  | 2.88175  | 1.66870  |
| H  | 1.38628  | 3.28836  | 0.24460  |
| H  | 0.66975  | 2.40107  | 1.61784  |
| N  | 1.91324  | 1.23879  | 0.40546  |
| N  | 2.37191  | -1.07359 | -0.45592 |
| C  | -1.65665 | -0.29507 | 0.41849  |
| C  | -2.91297 | -0.86101 | 0.59631  |
| C  | -1.38972 | 0.68277  | -0.52948 |
| H  | -3.07942 | -1.63013 | 1.35389  |
| H  | -0.37876 | 1.09464  | -0.63447 |
| C  | -3.95149 | -0.42017 | -0.22379 |
| C  | -2.44417 | 1.10620  | -1.33941 |
| H  | -4.94845 | -0.85284 | -0.10474 |
| H  | -2.25853 | 1.87316  | -2.09598 |
| C  | -3.71870 | 0.55949  | -1.18950 |
| H  | -4.53648 | 0.89792  | -1.83118 |
| Cl | -0.34546 | -0.87148 | 1.48352  |

#### 2.2aCl

|   |          |          |          |
|---|----------|----------|----------|
| C | -2.41734 | -0.68968 | -1.25091 |
|---|----------|----------|----------|



|    |          |          |          |
|----|----------|----------|----------|
| C  | -2.41667 | 0.69056  | -1.25117 |
| H  | -2.92367 | -1.30915 | -1.99835 |
| H  | -2.92240 | 1.31024  | -1.99884 |
| Be | -1.07301 | 0.00008  | 0.54266  |
| C  | -1.52737 | 2.66499  | -0.14891 |
| H  | -0.67350 | 2.99435  | -0.78175 |
| H  | -2.42253 | 3.22014  | -0.48684 |
| H  | -1.31191 | 2.97262  | 0.88833  |
| C  | -1.52965 | -2.66457 | -0.14806 |
| H  | -2.42551 | -3.21909 | -0.48517 |
| H  | -0.67645 | -2.99498 | -0.78125 |
| H  | -1.31385 | -2.97190 | 0.88919  |
| N  | -1.72287 | -1.24551 | -0.21523 |
| N  | -1.72182 | 1.24608  | -0.21559 |
| C  | 1.00325  | 0.00002  | 0.44331  |
| C  | 1.58287  | 1.22111  | 0.08458  |
| C  | 1.58184  | -1.22166 | 0.08489  |
| H  | 1.16258  | 2.16504  | 0.43770  |
| H  | 1.16071  | -2.16514 | 0.43823  |
| C  | 2.68401  | 1.20690  | -0.76729 |
| C  | 2.68296  | -1.20862 | -0.76702 |
| H  | 3.11994  | 2.15753  | -1.08862 |
| H  | 3.11806  | -2.15970 | -1.08814 |
| C  | 3.23343  | -0.00114 | -1.20420 |
| H  | 4.10249  | -0.00160 | -1.86712 |
| Cl | 0.06746  | 0.00058  | 2.25391  |

### 2.3aCl

|    |          |          |          |
|----|----------|----------|----------|
| C  | 2.03706  | -1.56613 | -0.73829 |
| C  | 2.03676  | -1.56513 | 0.74095  |
| H  | 2.49133  | -2.38406 | -1.31702 |
| H  | 2.49073  | -2.38233 | 1.32094  |
| Be | 0.70942  | 0.50742  | -0.00048 |
| C  | 1.32406  | -0.35752 | 2.68343  |
| H  | 1.80504  | -1.15540 | 3.27618  |
| H  | 1.76202  | 0.62345  | 2.93048  |
| H  | 0.24669  | -0.30725 | 2.91286  |
| C  | 1.32506  | -0.36111 | -2.68267 |
| H  | 1.80626  | -1.15980 | -3.27414 |
| H  | 0.24778  | -0.31117 | -2.91257 |
| H  | 1.76312  | 0.61952  | -2.93086 |
| N  | 1.46250  | -0.56116 | -1.26525 |
| N  | 1.46204  | -0.55943 | 1.26635  |
| C  | -1.02178 | 0.17837  | -0.00031 |
| C  | -1.96331 | 1.22379  | -0.00050 |

|    |          |          |          |
|----|----------|----------|----------|
| C  | -1.54472 | -1.12683 | 0.00005  |
| H  | -1.60717 | 2.26081  | -0.00083 |
| H  | -0.85971 | -1.98915 | 0.00022  |
| C  | -3.33978 | 0.98275  | -0.00036 |
| C  | -2.91704 | -1.38861 | 0.00022  |
| H  | -4.04331 | 1.82219  | -0.00055 |
| H  | -3.28360 | -2.42101 | 0.00049  |
| C  | -3.82217 | -0.32674 | 0.00001  |
| H  | -4.89986 | -0.51921 | 0.00012  |
| Cl | 1.53449  | 2.29181  | -0.00155 |

2.4aCl

|    |          |          |          |
|----|----------|----------|----------|
| C  | -1.11783 | -1.45768 | 1.40967  |
| C  | -1.75097 | -1.81635 | 0.20779  |
| H  | -0.82072 | -2.16298 | 2.19079  |
| H  | -2.12098 | -2.83126 | 0.01018  |
| Be | -1.10789 | 0.51089  | -0.08442 |
| C  | -2.40766 | -1.08164 | -2.00157 |
| H  | -2.86624 | -2.08350 | -2.08145 |
| H  | -3.18009 | -0.31770 | -2.19120 |
| H  | -1.63924 | -0.98200 | -2.78782 |
| C  | -0.18757 | 0.42552  | 2.61183  |
| H  | 0.57745  | -0.21026 | 3.09076  |
| H  | 0.24551  | 1.40866  | 2.38363  |
| H  | -1.03085 | 0.56819  | 3.30802  |
| N  | -0.70432 | -0.17682 | 1.39777  |
| N  | -1.81474 | -0.86706 | -0.70340 |
| C  | 0.86657  | 0.00069  | 0.09027  |
| C  | 1.62682  | 1.16001  | -0.05328 |
| C  | 1.42291  | -1.24558 | -0.13016 |
| H  | 1.18842  | 2.14716  | 0.12241  |
| H  | 0.82519  | -2.14969 | 0.06104  |
| C  | 2.95387  | 1.05097  | -0.48316 |
| C  | 2.74128  | -1.35557 | -0.57031 |
| H  | 3.55257  | 1.95708  | -0.61694 |
| H  | 3.17840  | -2.34076 | -0.75957 |
| C  | 3.50905  | -0.20102 | -0.74508 |
| H  | 4.54895  | -0.28116 | -1.07485 |
| Cl | -1.54896 | 2.33328  | -0.48200 |

2.5aCl

|   |         |          |         |
|---|---------|----------|---------|
| C | 0.79400 | -1.54898 | 1.09768 |
| C | 1.93776 | -1.67923 | 0.39047 |
| H | 0.30166 | -2.30142 | 1.71517 |

|    |          |          |          |
|----|----------|----------|----------|
| H  | 2.51148  | -2.61492 | 0.39329  |
| Be | 1.35993  | 0.58909  | -0.14000 |
| C  | 3.59441  | -0.72052 | -1.10922 |
| H  | 4.46994  | -0.94625 | -0.46903 |
| H  | 3.53328  | -1.50504 | -1.88925 |
| H  | 3.79070  | 0.23761  | -1.61553 |
| C  | 0.24991  | 0.50344  | 2.26847  |
| H  | 1.29193  | 0.47269  | 2.62195  |
| H  | -0.04710 | 1.55402  | 2.12588  |
| H  | -0.39606 | 0.02451  | 3.02560  |
| N  | 0.19122  | -0.22053 | 0.98465  |
| N  | 2.37318  | -0.61266 | -0.34682 |
| C  | -1.11455 | -0.24428 | 0.34154  |
| C  | -1.22348 | -0.90715 | -0.88776 |
| C  | -2.23443 | 0.38310  | 0.88467  |
| H  | -0.34269 | -1.39598 | -1.31385 |
| H  | -2.18105 | 0.91333  | 1.83577  |
| C  | -2.43918 | -0.94220 | -1.55920 |
| C  | -3.45471 | 0.33969  | 0.20458  |
| H  | -2.50747 | -1.45891 | -2.52042 |
| H  | -4.32637 | 0.83344  | 0.64311  |
| C  | -3.56499 | -0.32005 | -1.01423 |
| H  | -4.52184 | -0.34893 | -1.54208 |
| Cl | 1.16263  | 2.40170  | -0.62456 |

#### 2.1aBr

|    |          |          |          |
|----|----------|----------|----------|
| C  | -3.04117 | 1.49893  | 0.10318  |
| C  | -3.34112 | 0.52793  | 1.00848  |
| H  | -3.57721 | 2.44674  | -0.00497 |
| H  | -4.15436 | 0.58166  | 1.73899  |
| Be | -1.55526 | -0.23936 | -0.23278 |
| C  | -2.71657 | -1.66981 | 1.87723  |
| H  | -2.62982 | -1.33216 | 2.93024  |
| H  | -3.71186 | -2.14653 | 1.76388  |
| H  | -1.95627 | -2.45412 | 1.71972  |
| C  | -1.56099 | 2.12021  | -1.74498 |
| H  | -2.34969 | 2.27543  | -2.50942 |
| H  | -1.30776 | 3.11784  | -1.32898 |
| H  | -0.66613 | 1.74344  | -2.27119 |
| N  | -1.95873 | 1.18961  | -0.72599 |
| N  | -2.51430 | -0.59540 | 0.94503  |
| C  | 1.67644  | -0.21813 | -0.07627 |
| C  | 2.96017  | -0.74672 | 0.00454  |
| C  | 1.34640  | 1.04072  | 0.40834  |
| H  | 3.18712  | -1.74203 | -0.38536 |

|    |         |          |          |
|----|---------|----------|----------|
| H  | 0.31938 | 1.41790  | 0.32885  |
| C  | 3.95477 | 0.02795  | 0.60200  |
| C  | 2.35703 | 1.79722  | 1.00340  |
| H  | 4.97011 | -0.37033 | 0.67948  |
| H  | 2.11864 | 2.78969  | 1.39503  |
| C  | 3.65499 | 1.29580  | 1.10073  |
| H  | 4.43886 | 1.89639  | 1.56988  |
| Br | 0.31747 | -1.29916 | -0.91281 |

#### 2.2aBr

|    |          |          |          |
|----|----------|----------|----------|
| C  | 2.49686  | -1.58646 | -0.57779 |
| C  | 2.51479  | -1.46294 | 0.79485  |
| H  | 3.04903  | -2.34706 | -1.13946 |
| H  | 3.08522  | -2.11134 | 1.46792  |
| Be | 1.06059  | 0.17989  | -0.02675 |
| C  | 1.57970  | -0.24661 | 2.68195  |
| H  | 0.76019  | -0.88492 | 3.08065  |
| H  | 2.49682  | -0.49481 | 3.24894  |
| H  | 1.32281  | 0.80327  | 2.90415  |
| C  | 1.50945  | -0.72724 | -2.62705 |
| H  | 2.40296  | -1.10136 | -3.16132 |
| H  | 0.66407  | -1.40555 | -2.87916 |
| H  | 1.26890  | 0.26934  | -3.03537 |
| N  | 1.72693  | -0.65014 | -1.21223 |
| N  | 1.75802  | -0.42753 | 1.27105  |
| C  | -1.02717 | 0.10810  | -0.00042 |
| C  | -1.56829 | -0.20482 | 1.25257  |
| C  | -1.59193 | -0.39111 | -1.18040 |
| H  | -1.16197 | 0.24091  | 2.16311  |
| H  | -1.20424 | -0.08850 | -2.15561 |
| C  | -2.60672 | -1.12907 | 1.32094  |
| C  | -2.62988 | -1.31358 | -1.08751 |
| H  | -3.00836 | -1.40736 | 2.29974  |
| H  | -3.04963 | -1.73724 | -2.00465 |
| C  | -3.13687 | -1.69268 | 0.15774  |
| H  | -3.95634 | -2.41327 | 0.22053  |
| Br | -0.12989 | 2.03944  | -0.16353 |

#### 2.3aBr

|    |         |          |          |
|----|---------|----------|----------|
| C  | 1.33073 | 2.29218  | 0.73953  |
| C  | 1.33091 | 2.29228  | -0.73902 |
| H  | 1.62398 | 3.17917  | 1.32024  |
| H  | 1.62420 | 3.17939  | -1.31954 |
| Be | 0.46199 | -0.00267 | -0.00004 |

|    |          |          |          |
|----|----------|----------|----------|
| C  | 0.86958  | 0.96986  | -2.68276 |
| H  | 1.20141  | 1.84232  | -3.27243 |
| H  | 1.47938  | 0.08465  | -2.92778 |
| H  | -0.17993 | 0.72683  | -2.91842 |
| C  | 0.86946  | 0.96929  | 2.68297  |
| H  | 1.20119  | 1.84165  | 3.27283  |
| H  | -0.18004 | 0.72612  | 2.91852  |
| H  | 1.47932  | 0.08407  | 2.92782  |
| N  | 0.96133  | 1.19365  | 1.26486  |
| N  | 0.96144  | 1.19390  | -1.26461 |
| C  | -1.28851 | -0.13711 | -0.00008 |
| C  | -1.93987 | -1.38395 | 0.00002  |
| C  | -2.11979 | 0.99777  | -0.00015 |
| H  | -1.33726 | -2.30005 | 0.00008  |
| H  | -1.67079 | 2.00281  | -0.00023 |
| C  | -3.33293 | -1.49353 | 0.00004  |
| C  | -3.51402 | 0.90877  | -0.00014 |
| H  | -3.80491 | -2.48173 | 0.00012  |
| H  | -4.12596 | 1.81751  | -0.00020 |
| C  | -4.12581 | -0.34515 | -0.00003 |
| H  | -5.21749 | -0.42744 | -0.00002 |
| Br | 1.83203  | -1.63999 | -0.00014 |

#### 2.4aBr

|    |          |          |          |
|----|----------|----------|----------|
| C  | 0.02713  | 2.16279  | 1.28529  |
| C  | 0.56052  | 2.61676  | 0.06786  |
| H  | -0.56289 | 2.77467  | 1.97326  |
| H  | 0.53822  | 3.67231  | -0.23452 |
| Be | 0.85320  | 0.20662  | 0.02635  |
| C  | 1.59183  | 1.97622  | -2.02558 |
| H  | 1.71040  | 3.06348  | -2.18005 |
| H  | 2.57515  | 1.48916  | -2.13192 |
| H  | 0.93342  | 1.57720  | -2.81712 |
| C  | -0.19024 | 0.19442  | 2.67886  |
| H  | -1.17008 | 0.52354  | 3.06656  |
| H  | -0.19026 | -0.89722 | 2.55900  |
| H  | 0.59761  | 0.46573  | 3.40097  |
| N  | 0.12754  | 0.82601  | 1.41207  |
| N  | 1.03839  | 1.67930  | -0.72578 |
| C  | -1.17189 | -0.06881 | 0.10565  |
| C  | -1.45317 | -1.43375 | 0.12360  |
| C  | -2.12134 | 0.84510  | -0.31434 |
| H  | -0.70802 | -2.16033 | 0.46140  |
| H  | -1.90864 | 1.92232  | -0.24718 |
| C  | -2.69242 | -1.87821 | -0.34975 |

|    |          |          |          |
|----|----------|----------|----------|
| C  | -3.35114 | 0.40323  | -0.80027 |
| H  | -2.91334 | -2.94987 | -0.35643 |
| H  | -4.09486 | 1.12516  | -1.15113 |
| C  | -3.63657 | -0.96456 | -0.81660 |
| H  | -4.60492 | -1.31734 | -1.18333 |
| Br | 2.08136  | -1.45062 | -0.16563 |

2.5aBr

|    |          |          |          |
|----|----------|----------|----------|
| C  | -0.26332 | 2.19474  | 0.86829  |
| C  | -1.38505 | 2.39903  | 0.14397  |
| H  | 0.35952  | 2.94396  | 1.35889  |
| H  | -1.79752 | 3.40467  | -0.00807 |
| Be | -1.20751 | 0.01177  | -0.00208 |
| C  | -3.20263 | 1.50447  | -1.20109 |
| H  | -4.00711 | 2.00665  | -0.62883 |
| H  | -3.01024 | 2.10236  | -2.11383 |
| H  | -3.58540 | 0.52278  | -1.52184 |
| C  | -0.02511 | 0.30789  | 2.36829  |
| H  | -1.01614 | 0.61645  | 2.73390  |
| H  | 0.03960  | -0.79032 | 2.40717  |
| H  | 0.75173  | 0.75601  | 3.01328  |
| N  | 0.10693  | 0.78395  | 0.97719  |
| N  | -2.00853 | 1.31494  | -0.41156 |
| C  | 1.37215  | 0.46415  | 0.32885  |
| C  | 1.62321  | 1.01454  | -0.93423 |
| C  | 2.30621  | -0.40206 | 0.89722  |
| H  | 0.89179  | 1.69400  | -1.37902 |
| H  | 2.13685  | -0.85764 | 1.87279  |
| C  | 2.79532  | 0.70329  | -1.61349 |
| C  | 3.48279  | -0.70677 | 0.20865  |
| H  | 2.97487  | 1.14006  | -2.59976 |
| H  | 4.20606  | -1.38727 | 0.66662  |
| C  | 3.73470  | -0.15851 | -1.04448 |
| H  | 4.65710  | -0.40171 | -1.57846 |
| Br | -1.34541 | -2.01182 | -0.18017 |

2.1al

|    |          |          |          |
|----|----------|----------|----------|
| C  | -3.03761 | 1.76523  | -0.29308 |
| C  | -3.42190 | 1.08421  | 0.82234  |
| H  | -3.49555 | 2.69122  | -0.65405 |
| H  | -4.23577 | 1.38483  | 1.48967  |
| Be | -1.68325 | -0.10672 | -0.12640 |
| C  | -2.98951 | -0.86120 | 2.23508  |
| H  | -2.93867 | -0.26655 | 3.16968  |

|   |          |          |          |
|---|----------|----------|----------|
| H | -4.00098 | -1.31390 | 2.18543  |
| H | -2.26298 | -1.68655 | 2.33000  |
| C | -1.48976 | 1.78443  | -2.18715 |
| H | -2.26698 | 1.84212  | -2.97589 |
| H | -1.11762 | 2.81661  | -2.01731 |
| H | -0.65067 | 1.19454  | -2.59622 |
| N | -1.97838 | 1.17299  | -0.98271 |
| N | -2.68430 | -0.07112 | 1.07410  |
| C | 1.72302  | 0.01533  | 0.10689  |
| C | 3.04574  | -0.37313 | 0.30421  |
| C | 1.30430  | 1.33292  | 0.25506  |
| H | 3.35791  | -1.41395 | 0.18372  |
| H | 0.25463  | 1.60876  | 0.09258  |
| C | 3.97781  | 0.60045  | 0.66588  |
| C | 2.25196  | 2.29101  | 0.61907  |
| H | 5.02038  | 0.31226  | 0.82673  |
| H | 1.93774  | 3.33097  | 0.74273  |
| C | 3.58312  | 1.92914  | 0.82384  |
| H | 4.31830  | 2.68620  | 1.10947  |
| I | 0.29753  | -1.46949 | -0.45535 |

## 2.2a1

|    |          |          |          |
|----|----------|----------|----------|
| C  | -2.95910 | 1.11530  | -0.68606 |
| C  | -2.95943 | 1.11396  | 0.68650  |
| H  | -3.72075 | 1.59683  | -1.30800 |
| H  | -3.72143 | 1.59418  | 1.30903  |
| Be | -1.07258 | -0.07348 | -0.00051 |
| C  | -1.71493 | 0.43073  | 2.66857  |
| H  | -1.12294 | 1.31466  | 2.99638  |
| H  | -2.67309 | 0.45366  | 3.22205  |
| H  | -1.16946 | -0.47262 | 2.99368  |
| C  | -1.71344 | 0.43636  | -2.66887 |
| H  | -2.67125 | 0.46161  | -3.22285 |
| H  | -1.12041 | 1.32052  | -2.99416 |
| H  | -1.16868 | -0.46672 | -2.99591 |
| N  | -1.91655 | 0.41414  | -1.25036 |
| N  | -1.91710 | 0.41175  | 1.24988  |
| C  | 1.00421  | 0.40156  | 0.00033  |
| C  | 1.37716  | 0.98306  | 1.21942  |
| C  | 1.37845  | 0.98410  | -1.21786 |
| H  | 1.12169  | 0.50399  | 2.16738  |
| H  | 1.12403  | 0.50583  | -2.16650 |
| C  | 2.03990  | 2.20676  | 1.20994  |
| C  | 2.04120  | 2.20779  | -1.20663 |
| H  | 2.30082  | 2.68023  | 2.16074  |

|   |         |          |          |
|---|---------|----------|----------|
| H | 2.30318 | 2.68204  | -2.15676 |
| C | 2.36896 | 2.82550  | 0.00209  |
| H | 2.89278 | 3.78499  | 0.00279  |
| I | 0.63346 | -1.84296 | -0.00089 |

#### 2.3al

|    |          |          |          |
|----|----------|----------|----------|
| C  | -0.49368 | 2.71268  | -0.73783 |
| C  | -0.49367 | 2.71265  | 0.73796  |
| H  | -0.61990 | 3.63746  | -1.31895 |
| H  | -0.61986 | 3.63740  | 1.31913  |
| Be | -0.09061 | 0.30336  | 0.00000  |
| C  | -0.28735 | 1.33172  | 2.68397  |
| H  | -0.42810 | 2.25888  | 3.26598  |
| H  | -1.06851 | 0.59671  | 2.93842  |
| H  | 0.68896  | 0.87658  | 2.91914  |
| C  | -0.28740 | 1.33185  | -2.68391 |
| H  | -0.42817 | 2.25904  | -3.26588 |
| H  | 0.68893  | 0.87675  | -2.91913 |
| H  | -1.06854 | 0.59684  | -2.93839 |
| N  | -0.33648 | 1.56281  | -1.26333 |
| N  | -0.33647 | 1.56275  | 1.26340  |
| C  | 1.57248  | -0.24575 | -0.00002 |
| C  | 1.93445  | -1.60505 | 0.00001  |
| C  | 2.63311  | 0.67957  | -0.00005 |
| H  | 1.14723  | -2.36792 | 0.00004  |
| H  | 2.41716  | 1.75880  | -0.00008 |
| C  | 3.26980  | -2.01676 | 0.00002  |
| C  | 3.97372  | 0.28702  | -0.00006 |
| H  | 3.51232  | -3.08474 | 0.00004  |
| H  | 4.76967  | 1.03940  | -0.00008 |
| C  | 4.29520  | -1.07061 | -0.00002 |
| H  | 5.34237  | -1.38999 | -0.00002 |
| I  | -1.99925 | -1.10361 | -0.00002 |

#### 2.4al

|    |          |         |          |
|----|----------|---------|----------|
| C  | -0.95620 | 2.23571 | 1.26261  |
| C  | -0.52520 | 2.81058 | 0.05719  |
| H  | -1.70004 | 2.67340 | 1.93391  |
| H  | -0.80916 | 3.82499 | -0.25308 |
| Be | 0.38511  | 0.56429 | 0.04608  |
| C  | 0.70930  | 2.46854 | -1.99590 |
| H  | 0.51990  | 3.54407 | -2.16078 |
| H  | 1.79469  | 2.28250 | -2.05252 |
| H  | 0.22937  | 1.89702 | -2.80953 |



|   |          |          |          |
|---|----------|----------|----------|
| C | -0.66681 | 0.29629  | 2.68209  |
| H | -1.69870 | 0.38032  | 3.06499  |
| H | -0.39887 | -0.76353 | 2.57826  |
| H | 0.02936  | 0.76130  | 3.39965  |
| N | -0.50983 | 0.97163  | 1.40706  |
| N | 0.20435  | 2.02976  | -0.71615 |
| C | -1.49248 | -0.24491 | 0.10170  |
| C | -1.42412 | -1.63603 | 0.16557  |
| C | -2.62708 | 0.38625  | -0.37702 |
| H | -0.53563 | -2.14342 | 0.55337  |
| H | -2.69593 | 1.48336  | -0.34219 |
| C | -2.49483 | -2.39264 | -0.32184 |
| C | -3.68837 | -0.36599 | -0.87785 |
| H | -2.43947 | -3.48492 | -0.29089 |
| H | -4.57694 | 0.13354  | -1.27542 |
| C | -3.62063 | -1.76145 | -0.84886 |
| H | -4.45687 | -2.35756 | -1.22528 |
| I | 2.22745  | -0.79766 | -0.09863 |

#### 2.5al

|    |          |          |          |
|----|----------|----------|----------|
| C  | 0.68002  | 2.48744  | 0.74021  |
| C  | -0.36429 | 2.96831  | 0.03221  |
| H  | 1.51394  | 3.04800  | 1.16462  |
| H  | -0.47433 | 4.04003  | -0.17647 |
| Be | -0.88274 | 0.62867  | 0.03435  |
| C  | -2.43260 | 2.56847  | -1.18481 |
| H  | -3.06986 | 3.24692  | -0.58448 |
| H  | -2.12539 | 3.11020  | -2.10071 |
| H  | -3.05507 | 1.71436  | -1.49487 |
| C  | 0.41313  | 0.71569  | 2.36558  |
| H  | -0.44562 | 1.30780  | 2.71630  |
| H  | 0.17955  | -0.35303 | 2.48800  |
| H  | 1.30208  | 0.97995  | 2.96565  |
| N  | 0.62831  | 1.03843  | 0.94054  |
| N  | -1.29810 | 2.08205  | -0.43487 |
| C  | 1.73090  | 0.32839  | 0.30300  |
| C  | 2.06653  | 0.67732  | -1.01104 |
| C  | 2.41779  | -0.70700 | 0.93583  |
| H  | 1.52925  | 1.49130  | -1.50508 |
| H  | 2.17538  | -1.00913 | 1.95463  |
| C  | 3.07695  | -0.00403 | -1.67950 |
| C  | 3.43469  | -1.38349 | 0.25767  |
| H  | 3.32328  | 0.27551  | -2.70755 |
| H  | 3.96460  | -2.19431 | 0.76536  |
| C  | 3.76909  | -1.03891 | -1.04739 |

|   |          |          |          |
|---|----------|----------|----------|
| H | 4.56393  | -1.57412 | -1.57369 |
| I | -1.69652 | -1.47386 | -0.07282 |

### 3.1aF

|    |          |          |          |
|----|----------|----------|----------|
| C  | -2.58455 | 1.31548  | -0.72932 |
| C  | -2.95852 | 0.07592  | -1.12158 |
| H  | -3.09625 | 2.21853  | -1.09557 |
| H  | -3.79249 | -0.04426 | -1.82155 |
| Be | -0.95596 | 0.11262  | 0.52187  |
| C  | -3.07021 | -2.20915 | 0.65555  |
| H  | -3.52982 | -1.51635 | 1.38023  |
| H  | -3.87918 | -2.73108 | 0.11513  |
| H  | -2.49563 | -2.97322 | 1.20895  |
| C  | -1.19162 | 2.87059  | 0.51910  |
| H  | -0.80309 | 3.45653  | -0.34008 |
| H  | -2.06260 | 3.42236  | 0.92629  |
| H  | -0.41471 | 2.87491  | 1.30367  |
| N  | -1.52256 | 1.51589  | 0.16024  |
| P  | -1.93494 | -1.35561 | -0.57630 |
| C  | 1.70348  | -0.07627 | 0.65158  |
| C  | 2.23538  | -1.34094 | 0.49987  |
| C  | 2.22437  | 1.07524  | 0.09554  |
| H  | 1.74905  | -2.20727 | 0.95191  |
| H  | 1.73184  | 2.03823  | 0.24462  |
| C  | 3.39826  | -1.44906 | -0.26369 |
| C  | 3.38761  | 0.94031  | -0.66373 |
| H  | 3.85267  | -2.43184 | -0.41231 |
| H  | 3.83402  | 1.82588  | -1.12288 |
| C  | 3.97225  | -0.31459 | -0.83978 |
| H  | 4.88205  | -0.41069 | -1.43758 |
| F  | 0.53681  | 0.04728  | 1.41260  |

### 3.2aF

|    |          |          |          |
|----|----------|----------|----------|
| C  | 2.66412  | 0.26330  | 0.89885  |
| C  | 1.99666  | 1.45079  | 0.86314  |
| H  | 3.44579  | 0.06033  | 1.64554  |
| H  | 2.17955  | 2.22640  | 1.61275  |
| Be | 1.09359  | -0.39077 | -0.86261 |
| C  | -0.60236 | 2.45757  | 0.17466  |
| H  | -1.05131 | 1.81850  | 0.95577  |
| H  | -0.33487 | 3.43108  | 0.62150  |
| H  | -1.34840 | 2.64095  | -0.61517 |
| C  | 3.15232  | -1.94936 | 0.03676  |
| H  | 4.20902  | -1.76584 | -0.23879 |

|   |          |          |          |
|---|----------|----------|----------|
| H | 3.14387  | -2.42463 | 1.03826  |
| H | 2.74300  | -2.68059 | -0.67961 |
| N | 2.36081  | -0.74041 | 0.00759  |
| P | 0.91403  | 1.69279  | -0.55255 |
| C | -0.98356 | -0.58889 | -0.43159 |
| C | -1.05583 | -1.13075 | 0.84452  |
| C | -2.06781 | -0.08022 | -1.13050 |
| H | -0.17911 | -1.55515 | 1.33789  |
| H | -1.95681 | 0.27722  | -2.15652 |
| C | -2.29221 | -1.04661 | 1.49176  |
| C | -3.28462 | -0.01584 | -0.45515 |
| H | -2.37719 | -1.42968 | 2.51299  |
| H | -4.15376 | 0.40784  | -0.96665 |
| C | -3.40294 | -0.49463 | 0.85307  |
| H | -4.36431 | -0.44483 | 1.36989  |
| F | 0.07684  | -1.37775 | -1.51392 |

### 3.3aF

|    |          |          |          |
|----|----------|----------|----------|
| C  | 2.45150  | -0.10941 | 0.52299  |
| C  | 2.02824  | 1.17423  | 0.43462  |
| H  | 3.37511  | -0.31992 | 1.08583  |
| H  | 2.59547  | 1.95117  | 0.95708  |
| Be | 0.31091  | -1.37719 | -0.39771 |
| C  | 0.18621  | 3.28358  | 0.13307  |
| H  | -0.00239 | 3.16415  | 1.21348  |
| H  | 0.98871  | 4.02717  | -0.01393 |
| H  | -0.72547 | 3.66651  | -0.35504 |
| C  | 2.65569  | -2.40108 | -0.12155 |
| H  | 3.15154  | -2.64372 | 0.83908  |
| H  | 2.03842  | -3.26784 | -0.40921 |
| H  | 3.44159  | -2.28192 | -0.89158 |
| N  | 1.82396  | -1.20925 | -0.00454 |
| P  | 0.69496  | 1.68951  | -0.67049 |
| C  | -0.72364 | 0.63019  | -0.10049 |
| C  | -0.77744 | -0.00005 | 1.15949  |
| C  | -1.82664 | 0.48986  | -0.96543 |
| C  | -1.90028 | -0.74911 | 1.53254  |
| C  | -2.95018 | -0.23135 | -0.57968 |
| C  | -2.98605 | -0.85705 | 0.66904  |
| H  | 0.06135  | 0.12381  | 1.85357  |
| H  | -1.78676 | 0.95089  | -1.95774 |
| H  | -1.92038 | -1.24513 | 2.50674  |
| H  | -3.79645 | -0.32819 | -1.26494 |
| H  | -3.85984 | -1.44630 | 0.96036  |
| F  | -0.54901 | -2.34430 | -0.99460 |

## 3.4aF

|    |          |          |          |
|----|----------|----------|----------|
| C  | 2.29392  | -1.42948 | 0.07783  |
| C  | 1.13046  | -1.46824 | 0.80890  |
| H  | 2.89806  | -2.34670 | -0.00813 |
| H  | 0.80299  | -2.37723 | 1.31794  |
| Be | 1.90009  | 1.03718  | -0.39019 |
| C  | 0.00000  | 0.58567  | 2.59128  |
| H  | -0.59999 | -0.18118 | 3.10856  |
| H  | 0.97016  | 0.69786  | 3.10236  |
| H  | -0.53506 | 1.54897  | 2.62808  |
| C  | 4.00702  | -0.43922 | -1.28941 |
| H  | 4.85781  | -0.71168 | -0.63486 |
| H  | 3.94379  | -1.19081 | -2.09991 |
| H  | 4.24206  | 0.53150  | -1.75385 |
| N  | 2.76314  | -0.32806 | -0.55119 |
| P  | 0.30522  | 0.09723  | 0.84925  |
| C  | -1.37097 | -0.03858 | 0.13356  |
| C  | -1.90572 | -1.26811 | -0.26405 |
| C  | -2.12515 | 1.12910  | -0.04823 |
| H  | -1.31292 | -2.18013 | -0.14760 |
| H  | -1.70624 | 2.10247  | 0.22949  |
| C  | -3.18448 | -1.33168 | -0.81870 |
| C  | -3.40334 | 1.06334  | -0.59847 |
| H  | -3.59528 | -2.29742 | -1.12683 |
| H  | -3.98186 | 1.98081  | -0.73859 |
| C  | -3.93566 | -0.16842 | -0.98272 |
| H  | -4.93667 | -0.22008 | -1.42050 |
| F  | 2.04399  | 2.39184  | -0.82620 |

## 3.2b

|    |          |          |          |
|----|----------|----------|----------|
| C  | -0.91997 | 0.93629  | 1.41139  |
| C  | -2.02780 | 0.16009  | 1.38411  |
| H  | -0.40577 | 1.20577  | 2.34522  |
| H  | -2.42032 | -0.24357 | 2.32563  |
| Be | -1.16162 | 0.62186  | -0.98271 |
| C  | -2.98994 | -1.89286 | -0.42576 |
| H  | -1.99601 | -2.37092 | -0.40121 |
| H  | -3.62234 | -2.36071 | 0.34865  |
| H  | -3.45074 | -2.11074 | -1.40452 |
| C  | 0.38815  | 2.62160  | 0.26032  |
| H  | -0.23538 | 3.44357  | 0.65763  |
| H  | 1.29139  | 2.53149  | 0.89687  |
| H  | 0.71506  | 2.91065  | -0.75181 |

|   |          |          |          |
|---|----------|----------|----------|
| N | -0.35076 | 1.38252  | 0.20982  |
| P | -2.96893 | -0.03418 | -0.19421 |
| C | 1.13500  | -0.06177 | -0.49447 |
| C | 2.34022  | 0.53059  | -0.82102 |
| C | 1.00535  | -1.20693 | 0.27005  |
| H | 2.38959  | 1.38775  | -1.49407 |
| H | 0.02545  | -1.64673 | 0.47265  |
| C | 3.49049  | -0.01614 | -0.24500 |
| C | 2.17262  | -1.72833 | 0.82820  |
| H | 4.45890  | 0.44278  | -0.46436 |
| H | 2.10128  | -2.61536 | 1.46430  |
| C | 3.41392  | -1.13692 | 0.58146  |
| H | 4.32089  | -1.56057 | 1.01928  |
| F | 0.04617  | 0.01117  | -1.79274 |

### 3.4b

|    |          |          |          |
|----|----------|----------|----------|
| C  | -0.75259 | 0.10444  | -1.63445 |
| C  | -1.85259 | -0.61735 | -1.38723 |
| H  | -0.31633 | 0.26325  | -2.62903 |
| H  | -2.37537 | -1.05520 | -2.24793 |
| Be | -1.05798 | 0.51088  | 0.97092  |
| C  | -4.09492 | -0.35947 | 0.39425  |
| H  | -4.45419 | -0.45333 | 1.43323  |
| H  | -4.18344 | 0.69725  | 0.09248  |
| H  | -4.75910 | -0.96869 | -0.24315 |
| C  | -0.03278 | 2.22941  | -0.77812 |
| H  | 0.57108  | 2.48496  | -1.66763 |
| H  | -1.07127 | 2.55263  | -0.94663 |
| H  | 0.35514  | 2.74830  | 0.11015  |
| N  | -0.04982 | 0.77370  | -0.54236 |
| P  | -2.34881 | -1.02162 | 0.32843  |
| C  | 1.24912  | 0.17696  | -0.25849 |
| C  | 1.30999  | -1.20781 | -0.05221 |
| C  | 2.41253  | 0.94037  | -0.14438 |
| H  | 0.40534  | -1.81606 | -0.13837 |
| H  | 2.39753  | 2.02011  | -0.29297 |
| C  | 2.52193  | -1.81437 | 0.26171  |
| C  | 3.62370  | 0.32132  | 0.16926  |
| H  | 2.55201  | -2.89536 | 0.42257  |
| H  | 4.52725  | 0.93131  | 0.25475  |
| C  | 3.68644  | -1.05384 | 0.37277  |
| H  | 4.63760  | -1.53285 | 0.61922  |
| F  | -0.76650 | 1.39672  | 2.06234  |

### 2.1aCl

|   |         |         |         |
|---|---------|---------|---------|
| C | 3.40817 | 0.62812 | 0.18137 |
|---|---------|---------|---------|

|    |          |          |          |
|----|----------|----------|----------|
| C  | 2.71788  | 1.77445  | -0.02428 |
| H  | 4.48498  | 0.63501  | 0.41049  |
| H  | 3.23747  | 2.73718  | 0.02992  |
| Be | 1.31017  | -0.38123 | -0.26433 |
| C  | 0.00296  | 2.14649  | 0.96028  |
| H  | 0.36112  | 1.65976  | 1.88336  |
| H  | 0.06896  | 3.23976  | 1.09959  |
| H  | -1.06309 | 1.89385  | 0.81430  |
| C  | 3.60914  | -1.78816 | 0.37625  |
| H  | 4.41420  | -1.92339 | -0.37430 |
| H  | 4.08986  | -1.73896 | 1.37398  |
| H  | 2.98761  | -2.69993 | 0.35723  |
| N  | 2.79638  | -0.62871 | 0.10682  |
| P  | 0.96495  | 1.63870  | -0.57554 |
| C  | -1.62670 | -0.96664 | -0.16728 |
| C  | -2.26047 | -0.98281 | 1.06760  |
| C  | -2.04664 | -0.17478 | -1.22781 |
| H  | -1.88872 | -1.61167 | 1.87909  |
| H  | -1.50360 | -0.16901 | -2.17448 |
| C  | -3.37535 | -0.16233 | 1.24123  |
| C  | -3.16097 | 0.63939  | -1.03077 |
| H  | -3.88877 | -0.15292 | 2.20613  |
| H  | -3.50261 | 1.28257  | -1.84561 |
| C  | -3.82338 | 0.64640  | 0.19712  |
| H  | -4.69171 | 1.29384  | 0.34377  |
| Cl | -0.18019 | -1.98009 | -0.38253 |

## 2.2aCl

|    |          |          |          |
|----|----------|----------|----------|
| C  | 2.56758  | 0.43049  | 1.09549  |
| C  | 2.09341  | 1.67061  | 0.77315  |
| H  | 3.27871  | 0.27856  | 1.92085  |
| H  | 2.35913  | 2.54861  | 1.36991  |
| Be | 1.01872  | -0.33796 | -0.65615 |
| C  | -0.33279 | 2.76800  | -0.34169 |
| H  | -0.92831 | 2.30483  | 0.46439  |
| H  | -0.02210 | 3.77793  | -0.02149 |
| H  | -0.96577 | 2.87711  | -1.23762 |
| C  | 2.74034  | -1.95281 | 0.74414  |
| H  | 3.83227  | -1.97703 | 0.56229  |
| H  | 2.57247  | -2.20536 | 1.81121  |
| H  | 2.28316  | -2.75054 | 0.13675  |
| N  | 2.15531  | -0.67793 | 0.39956  |
| P  | 1.15409  | 1.75049  | -0.75015 |
| C  | -1.02829 | -0.57817 | -0.26829 |
| C  | -1.12799 | -1.05933 | 1.04015  |

|    |          |          |          |
|----|----------|----------|----------|
| C  | -2.07121 | 0.11577  | -0.88639 |
| H  | -0.32172 | -1.64046 | 1.49084  |
| H  | -1.98936 | 0.42559  | -1.93079 |
| C  | -2.26822 | -0.72884 | 1.77378  |
| C  | -3.20005 | 0.42226  | -0.13293 |
| H  | -2.34216 | -1.06423 | 2.81242  |
| H  | -4.01165 | 0.98889  | -0.59873 |
| C  | -3.30434 | 0.00651  | 1.19744  |
| H  | -4.19812 | 0.24614  | 1.77901  |
| Cl | -0.02533 | -1.79630 | -1.61460 |

#### 2.4aCl

|    |          |          |          |
|----|----------|----------|----------|
| C  | 1.94554  | -1.88894 | -0.21842 |
| C  | 0.76145  | -1.96864 | 0.47307  |
| H  | 2.45503  | -2.81958 | -0.51377 |
| H  | 0.32100  | -2.92735 | 0.75412  |
| Be | 1.81855  | 0.63600  | -0.09064 |
| C  | -0.17909 | -0.23703 | 2.67263  |
| H  | -0.89076 | -1.01045 | 3.00530  |
| H  | 0.78068  | -0.36991 | 3.19791  |
| H  | -0.58535 | 0.75812  | 2.91761  |
| C  | 3.79021  | -0.79970 | -1.31436 |
| H  | 4.56606  | -1.37553 | -0.77394 |
| H  | 3.64684  | -1.26427 | -2.30894 |
| H  | 4.18005  | 0.21775  | -1.47389 |
| N  | 2.54925  | -0.72576 | -0.56521 |
| P  | 0.11410  | -0.36842 | 0.86802  |
| C  | -1.53747 | -0.12958 | 0.12764  |
| C  | -2.18878 | -1.15781 | -0.56095 |
| C  | -2.15100 | 1.12655  | 0.23121  |
| H  | -1.70327 | -2.13251 | -0.66581 |
| H  | -1.63811 | 1.95045  | 0.73940  |
| C  | -3.44675 | -0.93842 | -1.12309 |
| C  | -3.40898 | 1.34181  | -0.32726 |
| H  | -3.94994 | -1.74836 | -1.65903 |
| H  | -3.87997 | 2.32514  | -0.24236 |
| C  | -4.05960 | 0.30813  | -1.00301 |
| H  | -5.04515 | 0.47863  | -1.44570 |
| Cl | 2.22114  | 2.47307  | -0.23394 |

#### 2.3bCl

|   |          |          |         |
|---|----------|----------|---------|
| C | -0.91296 | 0.65479  | 1.61872 |
| C | -2.08346 | -0.00566 | 1.54494 |
| H | -0.34604 | 0.80042  | 2.54727 |

|    |          |          |          |
|----|----------|----------|----------|
| H  | -2.49168 | -0.45277 | 2.46093  |
| Be | -1.25810 | 0.57634  | -0.86400 |
| C  | -3.22380 | -1.84734 | -0.35626 |
| H  | -3.71028 | -1.97278 | -1.33860 |
| H  | -2.26165 | -2.38589 | -0.37701 |
| H  | -3.87714 | -2.31542 | 0.40025  |
| C  | 0.09243  | 2.56542  | 0.51113  |
| H  | 0.89607  | 2.68028  | 1.26093  |
| H  | 0.46371  | 2.90641  | -0.46835 |
| H  | -0.75997 | 3.20294  | 0.80346  |
| N  | -0.35070 | 1.18235  | 0.41995  |
| P  | -3.06375 | -0.01377 | -0.01955 |
| C  | 1.18697  | 0.10722  | -0.12565 |
| C  | 2.40443  | 0.78086  | -0.20961 |
| C  | 1.11044  | -1.18256 | 0.40102  |
| H  | 2.46144  | 1.80616  | -0.57985 |
| H  | 0.14045  | -1.66573 | 0.54762  |
| C  | 3.57405  | 0.08647  | 0.10596  |
| C  | 2.29117  | -1.85428 | 0.70804  |
| H  | 4.53403  | 0.60038  | -0.00237 |
| H  | 2.23043  | -2.87757 | 1.09072  |
| C  | 3.53161  | -1.23189 | 0.55657  |
| H  | 4.45389  | -1.76333 | 0.80333  |
| Cl | 0.22853  | 0.15432  | -2.05105 |

### 3.4b

|    |          |          |          |
|----|----------|----------|----------|
| C  | 0.66547  | -1.19852 | 1.41987  |
| C  | 1.75980  | -1.64143 | 0.79029  |
| H  | 0.19609  | -1.68521 | 2.28415  |
| H  | 2.24539  | -2.54138 | 1.19007  |
| Be | 1.03086  | 0.72759  | -0.35542 |
| C  | 4.04568  | -0.36281 | -0.41835 |
| H  | 4.40015  | 0.24899  | -1.26528 |
| H  | 4.14229  | 0.23420  | 0.50333  |
| H  | 4.70540  | -1.24452 | -0.34397 |
| C  | 0.00771  | 0.99753  | 2.11173  |
| H  | -0.63325 | 0.63621  | 2.93565  |
| H  | 1.04221  | 1.09283  | 2.47439  |
| H  | -0.33323 | 1.98337  | 1.76476  |
| N  | 0.01150  | 0.03832  | 0.98789  |
| P  | 2.29314  | -0.89026 | -0.79228 |
| C  | -1.29626 | -0.20236 | 0.38161  |
| C  | -1.39426 | -1.18212 | -0.61490 |
| C  | -2.42442 | 0.54344  | 0.72716  |
| H  | -0.51656 | -1.77010 | -0.89660 |



|    |          |          |          |
|----|----------|----------|----------|
| H  | -2.37911 | 1.32006  | 1.49010  |
| C  | -2.61032 | -1.40985 | -1.25169 |
| C  | -3.63946 | 0.30524  | 0.08336  |
| H  | -2.66975 | -2.17614 | -2.02910 |
| H  | -4.51529 | 0.89706  | 0.36349  |
| C  | -3.74028 | -0.66913 | -0.90509 |
| H  | -4.69453 | -0.84910 | -1.40699 |
| Cl | 0.71572  | 2.52642  | -0.85985 |

### 3.1aBr

|    |          |          |          |
|----|----------|----------|----------|
| C  | 3.47397  | 0.94084  | 0.15198  |
| C  | 2.75671  | 2.06180  | -0.09599 |
| H  | 4.55538  | 0.97999  | 0.35448  |
| H  | 3.25860  | 3.03535  | -0.10461 |
| Be | 1.38391  | -0.13140 | -0.18783 |
| C  | 0.05569  | 2.44439  | 0.92354  |
| H  | 0.43633  | 2.01278  | 1.86480  |
| H  | 0.11026  | 3.54440  | 1.00188  |
| H  | -1.00927 | 2.17130  | 0.81081  |
| C  | 3.72772  | -1.45631 | 0.46787  |
| H  | 4.52554  | -1.60816 | -0.28724 |
| H  | 4.22026  | -1.35145 | 1.45558  |
| H  | 3.12754  | -2.38229 | 0.49925  |
| N  | 2.88516  | -0.32905 | 0.15752  |
| P  | 0.99607  | 1.86459  | -0.59937 |
| C  | -1.68280 | -0.67718 | -0.07574 |
| C  | -2.36208 | -0.60632 | 1.13447  |
| C  | -2.02505 | 0.09535  | -1.17941 |
| H  | -2.05881 | -1.21794 | 1.98710  |
| H  | -1.45443 | 0.03820  | -2.10820 |
| C  | -3.43368 | 0.28141  | 1.23663  |
| C  | -3.09720 | 0.97806  | -1.05466 |
| H  | -3.97679 | 0.35884  | 2.18216  |
| H  | -3.37320 | 1.60563  | -1.90586 |
| C  | -3.79920 | 1.07146  | 0.14713  |
| H  | -4.63260 | 1.77300  | 0.23770  |
| Br | -0.17389 | -1.85430 | -0.20810 |

### 3.2aBr

|    |         |          |          |
|----|---------|----------|----------|
| C  | 2.65044 | 0.69383  | 1.17018  |
| C  | 2.43710 | 1.81786  | 0.42012  |
| H  | 3.32883 | 0.69678  | 2.03598  |
| H  | 2.89717 | 2.77169  | 0.69618  |
| Be | 0.95835 | -0.30392 | -0.31364 |

|    |          |          |          |
|----|----------|----------|----------|
| C  | 0.27202  | 2.90635  | -1.17720 |
| H  | -0.47669 | 2.81312  | -0.37006 |
| H  | 0.76766  | 3.88890  | -1.09122 |
| H  | -0.24664 | 2.87280  | -2.14978 |
| C  | 2.28511  | -1.63526 | 1.68859  |
| H  | 3.36973  | -1.81653 | 1.81058  |
| H  | 1.84757  | -1.52734 | 2.70407  |
| H  | 1.84530  | -2.53632 | 1.23119  |
| N  | 2.01439  | -0.48164 | 0.86486  |
| P  | 1.52377  | 1.55027  | -1.09502 |
| C  | -1.07516 | -0.19488 | 0.05791  |
| C  | -1.27041 | -0.35995 | 1.43492  |
| C  | -1.95793 | 0.56785  | -0.71622 |
| H  | -0.61092 | -1.00047 | 2.02404  |
| H  | -1.82469 | 0.64156  | -1.79808 |
| C  | -2.30273 | 0.34561  | 2.05109  |
| C  | -2.98708 | 1.25382  | -0.07891 |
| H  | -2.43669 | 0.25108  | 3.13257  |
| H  | -3.66055 | 1.87526  | -0.67642 |
| C  | -3.16267 | 1.15145  | 1.30359  |
| H  | -3.97816 | 1.68830  | 1.79502  |
| Br | -0.31271 | -1.95902 | -0.98979 |

### 3.4aBr

|    |          |          |          |
|----|----------|----------|----------|
| C  | 1.14478  | 2.54815  | 0.31382  |
| C  | -0.04421 | 2.42453  | -0.36187 |
| H  | 1.45914  | 3.54323  | 0.66569  |
| H  | -0.67862 | 3.28703  | -0.57567 |
| Be | 1.52952  | 0.06538  | 0.03323  |
| C  | -0.63900 | 0.66755  | -2.66429 |
| H  | -1.50681 | 1.28595  | -2.94718 |
| H  | 0.26013  | 1.03576  | -3.18456 |
| H  | -0.82366 | -0.37653 | -2.96622 |
| C  | 3.20813  | 1.79982  | 1.30389  |
| H  | 3.87549  | 2.47379  | 0.73296  |
| H  | 3.01066  | 2.26317  | 2.28935  |
| H  | 3.75295  | 0.85899  | 1.47911  |
| N  | 1.98083  | 1.51350  | 0.58298  |
| P  | -0.35203 | 0.75176  | -0.85626 |
| C  | -1.89805 | 0.11612  | -0.12510 |
| C  | -2.75946 | 0.93564  | 0.61120  |
| C  | -2.20702 | -1.24178 | -0.28551 |
| H  | -2.51114 | 1.99052  | 0.76056  |
| H  | -1.52387 | -1.90116 | -0.83179 |
| C  | -3.92623 | 0.40695  | 1.16451  |

|    |          |          |         |
|----|----------|----------|---------|
| C  | -3.37503 | -1.76573 | 0.26377 |
| H  | -4.59435 | 1.05329  | 1.74077 |
| H  | -3.60684 | -2.82661 | 0.13484 |
| C  | -4.23704 | -0.94086 | 0.98825 |
| H  | -5.15104 | -1.35384 | 1.42454 |
| Br | 2.33524  | -1.80481 | 0.07588 |

### 3.2bBr

|    |          |          |          |
|----|----------|----------|----------|
| C  | -0.85186 | -1.52671 | 1.49122  |
| C  | -1.90907 | -1.84597 | 0.70320  |
| H  | -0.29441 | -2.27512 | 2.07180  |
| H  | -2.21749 | -2.89472 | 0.61799  |
| Be | -1.27102 | 0.68320  | 0.50085  |
| C  | -3.00270 | -0.79499 | -1.80156 |
| H  | -3.55023 | 0.04007  | -2.27101 |
| H  | -2.01957 | -0.87793 | -2.29625 |
| H  | -3.57099 | -1.71947 | -2.00268 |
| C  | 0.39145  | 0.17345  | 2.68541  |
| H  | 1.27313  | -0.48662 | 2.80710  |
| H  | 0.74793  | 1.20956  | 2.56258  |
| H  | -0.20070 | 0.12968  | 3.61886  |
| N  | -0.40345 | -0.20939 | 1.54532  |
| P  | -2.93177 | -0.47684 | 0.03669  |
| C  | 1.18023  | 0.01618  | -0.13761 |
| C  | 2.43527  | 0.21442  | 0.41125  |
| C  | 0.88080  | -0.96486 | -1.06457 |
| H  | 2.64243  | 1.02905  | 1.10691  |
| H  | -0.12265 | -1.08894 | -1.47665 |
| C  | 3.44144  | -0.68220 | 0.03894  |
| C  | 1.91049  | -1.83937 | -1.42119 |
| H  | 4.44037  | -0.55848 | 0.46788  |
| H  | 1.69585  | -2.63615 | -2.13938 |
| C  | 3.18595  | -1.70673 | -0.87226 |
| H  | 3.98278  | -2.39602 | -1.16232 |
| Br | 0.08876  | 2.06147  | -0.44207 |

### 3.4b

|    |          |          |          |
|----|----------|----------|----------|
| C  | -0.59532 | -2.00601 | 0.98347  |
| C  | -1.82782 | -2.14250 | 0.48163  |
| H  | 0.01879  | -2.82434 | 1.37941  |
| H  | -2.25462 | -3.15363 | 0.44997  |
| Be | -1.06675 | 0.46723  | 0.15164  |
| C  | -3.17939 | -0.98896 | -1.78342 |
| H  | -3.63389 | -0.07395 | -2.19984 |

|    |          |          |          |
|----|----------|----------|----------|
| H  | -2.28572 | -1.23237 | -2.38184 |
| H  | -3.91424 | -1.80538 | -1.89092 |
| C  | 0.09747  | -0.20524 | 2.43552  |
| H  | 0.76190  | -0.84306 | 3.04496  |
| H  | 0.44817  | 0.83782  | 2.46040  |
| H  | -0.92067 | -0.24808 | 2.85137  |
| N  | 0.03777  | -0.68577 | 1.03762  |
| P  | -2.81912 | -0.67273 | 0.02344  |
| C  | 1.31528  | -0.69324 | 0.33291  |
| C  | 2.47801  | -0.14910 | 0.87676  |
| C  | 1.34172  | -1.23326 | -0.95830 |
| H  | 2.48654  | 0.29163  | 1.87349  |
| H  | 0.43013  | -1.65949 | -1.38578 |
| C  | 3.65827  | -0.15082 | 0.13129  |
| C  | 2.52199  | -1.22991 | -1.69393 |
| H  | 4.56321  | 0.28122  | 0.56710  |
| H  | 2.52729  | -1.65294 | -2.70203 |
| C  | 3.68825  | -0.68942 | -1.15143 |
| H  | 4.61610  | -0.68525 | -1.72944 |
| Br | -0.38698 | 2.36345  | -0.18529 |

### 3.1al

|    |          |          |          |
|----|----------|----------|----------|
| C  | 3.56519  | 1.21582  | 0.14380  |
| C  | 2.82439  | 2.31325  | -0.13648 |
| H  | 4.64658  | 1.28331  | 0.33863  |
| H  | 3.30621  | 3.29608  | -0.17889 |
| Be | 1.49273  | 0.08899  | -0.14667 |
| C  | 0.13138  | 2.69527  | 0.88960  |
| H  | 0.52407  | 2.30161  | 1.84232  |
| H  | 0.17993  | 3.79780  | 0.92503  |
| H  | -0.93258 | 2.41158  | 0.79745  |
| C  | 3.86955  | -1.16170 | 0.54028  |
| H  | 4.66786  | -1.32304 | -0.21235 |
| H  | 4.36321  | -1.01242 | 1.52176  |
| H  | 3.29025  | -2.09921 | 0.60734  |
| N  | 3.00153  | -0.06455 | 0.19497  |
| P  | 1.06412  | 2.06687  | -0.61788 |
| C  | -1.77803 | -0.38635 | -0.04186 |
| C  | -2.49832 | -0.28373 | 1.14493  |
| C  | -2.03778 | 0.42618  | -1.14206 |
| H  | -2.27081 | -0.92047 | 2.00307  |
| H  | -1.44438 | 0.35381  | -2.05570 |
| C  | -3.51597 | 0.66763  | 1.22552  |
| C  | -3.05749 | 1.37261  | -1.04044 |
| H  | -4.08546 | 0.76573  | 2.15365  |

|   |          |          |          |
|---|----------|----------|----------|
| H | -3.26327 | 2.02775  | -1.89087 |
| C | -3.79457 | 1.49358  | 0.13718  |
| H | -4.58650 | 2.24366  | 0.20978  |
| I | -0.18092 | -1.77639 | -0.14894 |

### 3.2al

|    |          |          |          |
|----|----------|----------|----------|
| C  | 2.92581  | -0.82610 | 1.06123  |
| C  | 3.38904  | 0.01076  | 0.08438  |
| H  | 3.58299  | -1.20142 | 1.85979  |
| H  | 4.41899  | 0.38078  | 0.11088  |
| Be | 0.76288  | -0.52578 | -0.07228 |
| C  | 2.20364  | 2.13162  | -1.51497 |
| H  | 1.74462  | 2.63800  | -0.64722 |
| H  | 3.22143  | 2.53233  | -1.66348 |
| H  | 1.61446  | 2.36841  | -2.41693 |
| C  | 1.20275  | -2.19148 | 2.07136  |
| H  | 1.36513  | -3.23174 | 1.72471  |
| H  | 1.75388  | -2.06411 | 3.02278  |
| H  | 0.12551  | -2.08952 | 2.28982  |
| N  | 1.60939  | -1.21520 | 1.09043  |
| P  | 2.25675  | 0.29446  | -1.27783 |
| C  | -0.79574 | 0.74873  | 0.19581  |
| C  | -0.96007 | 0.96865  | 1.57173  |
| C  | -1.01132 | 1.78899  | -0.72166 |
| H  | -0.83977 | 0.15185  | 2.28719  |
| H  | -0.92783 | 1.60344  | -1.79554 |
| C  | -1.23523 | 2.25713  | 2.02614  |
| C  | -1.29595 | 3.06520  | -0.24963 |
| H  | -1.32628 | 2.43493  | 3.10146  |
| H  | -1.43393 | 3.88020  | -0.96609 |
| C  | -1.40517 | 3.30659  | 1.12284  |
| H  | -1.63320 | 4.31192  | 1.48666  |
| I  | -1.47059 | -1.37892 | -0.57460 |

### 3.4al

|    |          |          |          |
|----|----------|----------|----------|
| C  | -0.25346 | 2.94224  | -0.39165 |
| C  | 0.88760  | 2.60689  | 0.29246  |
| H  | -0.36359 | 3.96611  | -0.78141 |
| H  | 1.68064  | 3.33319  | 0.48078  |
| Be | -1.12398 | 0.60194  | -0.02212 |
| C  | 1.14418  | 0.83017  | 2.64502  |
| H  | 2.12257  | 1.26879  | 2.90136  |
| H  | 0.34518  | 1.38418  | 3.16433  |
| H  | 1.12154  | -0.22253 | 2.97215  |

|   |          |          |          |
|---|----------|----------|----------|
| C | -2.41695 | 2.58465  | -1.38545 |
| H | -2.86415 | 3.48330  | -0.91932 |
| H | -2.13716 | 2.83812  | -2.42598 |
| H | -3.19552 | 1.80725  | -1.42959 |
| N | -1.28476 | 2.08720  | -0.62434 |
| P | 0.85560  | 0.92100  | 0.83879  |
| C | 2.21987  | -0.04670 | 0.11268  |
| C | 3.32808  | 0.56319  | -0.48448 |
| C | 2.13796  | -1.44533 | 0.15248  |
| H | 3.38638  | 1.65410  | -0.54237 |
| H | 1.25826  | -1.93173 | 0.58811  |
| C | 4.35193  | -0.21795 | -1.02018 |
| C | 3.16421  | -2.22285 | -0.38051 |
| H | 5.21572  | 0.26421  | -1.48664 |
| H | 3.09075  | -3.31348 | -0.34920 |
| C | 4.27291  | -1.60952 | -0.96522 |
| H | 5.07577  | -2.22011 | -1.38824 |
| I | -2.39810 | -1.26516 | -0.00675 |

### 3.2bl

|    |          |          |          |
|----|----------|----------|----------|
| C  | -0.80990 | -1.93113 | 0.95434  |
| C  | -2.01079 | -2.06800 | 0.36015  |
| H  | -0.15713 | -2.78410 | 1.18719  |
| H  | -2.35289 | -3.07393 | 0.08618  |
| Be | -1.43306 | 0.41215  | 0.69876  |
| C  | -3.32227 | -0.42977 | -1.65295 |
| H  | -3.86864 | 0.50720  | -1.85632 |
| H  | -2.36307 | -0.39888 | -2.19627 |
| H  | -3.92569 | -1.26072 | -2.05680 |
| C  | 0.32162  | -0.54543 | 2.56105  |
| H  | 1.17827  | -1.24029 | 2.64042  |
| H  | 0.69584  | 0.47927  | 2.72992  |
| H  | -0.40251 | -0.78531 | 3.35969  |
| N  | -0.29774 | -0.64122 | 1.24888  |
| P  | -3.15316 | -0.61753 | 0.20364  |
| C  | 1.07905  | -0.16606 | -0.05370 |
| C  | 2.36898  | -0.26530 | 0.52623  |
| C  | 0.83544  | -0.94303 | -1.22004 |
| H  | 2.66589  | 0.41185  | 1.33096  |
| H  | -0.09994 | -0.82064 | -1.77274 |
| C  | 3.26464  | -1.24298 | 0.09428  |
| C  | 1.74625  | -1.90447 | -1.63107 |
| H  | 4.23538  | -1.31369 | 0.59574  |
| H  | 1.49767  | -2.51269 | -2.50664 |
| C  | 2.96481  | -2.08853 | -0.97079 |

|   |         |          |          |
|---|---------|----------|----------|
| H | 3.68102 | -2.83984 | -1.31121 |
| I | 0.29627 | 1.83477  | -0.16277 |

3.4bl

|    |          |          |          |
|----|----------|----------|----------|
| C  | -0.24972 | -2.48205 | 0.83262  |
| C  | -1.46784 | -2.72823 | 0.33792  |
| H  | 0.47113  | -3.24580 | 1.14902  |
| H  | -1.76558 | -3.77879 | 0.22275  |
| Be | -1.03636 | -0.03272 | 0.21574  |
| C  | -3.03660 | -1.56721 | -1.78256 |
| H  | -3.64667 | -0.70229 | -2.09400 |
| H  | -2.14612 | -1.61192 | -2.43126 |
| H  | -3.64016 | -2.47739 | -1.94153 |
| C  | 0.23099  | -0.74030 | 2.43233  |
| H  | 0.96605  | -1.35231 | 2.98399  |
| H  | 0.46554  | 0.32850  | 2.55122  |
| H  | -0.77324 | -0.93105 | 2.84035  |
| N  | 0.21530  | -1.10046 | 0.99654  |
| P  | -2.64478 | -1.35983 | 0.03246  |
| C  | 1.48094  | -0.89675 | 0.29751  |
| C  | 2.57872  | -0.27982 | 0.89498  |
| C  | 1.55682  | -1.30554 | -1.03908 |
| H  | 2.54531  | 0.05994  | 1.93003  |
| H  | 0.69520  | -1.78900 | -1.50769 |
| C  | 3.74485  | -0.07426 | 0.15574  |
| C  | 2.72219  | -1.09544 | -1.76819 |
| H  | 4.59917  | 0.41347  | 0.63290  |
| H  | 2.76691  | -1.41419 | -2.81306 |
| C  | 3.82359  | -0.47924 | -1.17316 |
| H  | 4.73937  | -0.31257 | -1.74622 |
| I  | -0.59001 | 2.16864  | -0.06096 |

4.1aF

|    |         |          |          |
|----|---------|----------|----------|
| C  | 2.67250 | 1.73779  | -0.05443 |
| C  | 3.47570 | 0.66425  | 0.12665  |
| H  | 2.96607 | 2.79036  | -0.06005 |
| H  | 4.55616 | 0.70441  | 0.29647  |
| Be | 1.35481 | -0.07305 | -0.19048 |
| C  | 3.53109 | -1.78550 | 0.26688  |
| H  | 4.03004 | -1.82745 | 1.25705  |
| H  | 2.84865 | -2.65050 | 0.20757  |
| H  | 4.31603 | -1.93177 | -0.50372 |
| N  | 2.79675 | -0.56699 | 0.07626  |
| O  | 1.35558 | 1.44450  | -0.25496 |

|   |          |          |          |
|---|----------|----------|----------|
| C | -1.40880 | -0.43171 | -0.13749 |
| C | -2.40072 | -1.39245 | -0.13474 |
| C | -1.60727 | 0.92461  | 0.02599  |
| H | -2.15623 | -2.44735 | -0.27347 |
| H | -0.75719 | 1.61598  | 0.00823  |
| C | -3.71013 | -0.94831 | 0.05216  |
| C | -2.92877 | 1.33824  | 0.21219  |
| H | -4.52683 | -1.67460 | 0.06219  |
| H | -3.13597 | 2.40281  | 0.34792  |
| C | -3.97219 | 0.41188  | 0.22562  |
| H | -5.00031 | 0.75259  | 0.37228  |
| F | -0.09890 | -0.90469 | -0.32707 |

#### 4.2aF

|    |          |          |          |
|----|----------|----------|----------|
| C  | 2.17290  | -1.37951 | -0.71264 |
| C  | 1.94075  | -1.14375 | 0.66190  |
| H  | 2.54982  | -2.33388 | -1.11115 |
| H  | 2.00011  | -1.90409 | 1.44697  |
| Be | 1.18831  | 0.81946  | -0.66972 |
| C  | 1.16010  | 0.55837  | 2.18778  |
| H  | 0.60780  | -0.18389 | 2.78939  |
| H  | 2.12253  | 0.78218  | 2.67943  |
| H  | 0.57620  | 1.48636  | 2.12255  |
| N  | 1.44551  | 0.07437  | 0.85388  |
| O  | 1.85932  | -0.45548 | -1.51009 |
| C  | -0.55263 | 0.11579  | -0.08600 |
| C  | -1.44825 | 1.18243  | -0.01369 |
| C  | -0.99976 | -1.18988 | -0.11177 |
| H  | -1.08848 | 2.21612  | 0.01095  |
| H  | -0.27567 | -2.02130 | -0.10582 |
| C  | -2.82069 | 0.91287  | -0.02503 |
| C  | -2.36864 | -1.46214 | -0.13637 |
| H  | -3.53600 | 1.74037  | 0.00981  |
| H  | -2.72644 | -2.49551 | -0.17650 |
| C  | -3.27904 | -0.40399 | -0.08884 |
| H  | -4.35369 | -0.60836 | -0.09083 |
| F  | 1.28322  | 2.22514  | -0.98271 |

#### 4.5aF

|    |         |          |          |
|----|---------|----------|----------|
| C  | 2.38954 | -1.34586 | -0.62936 |
| C  | 1.47329 | -1.44017 | 0.35540  |
| H  | 3.00817 | -2.19393 | -0.95103 |
| H  | 1.25592 | -2.32181 | 0.96139  |
| Be | 1.70276 | 0.87339  | -0.55575 |



|   |          |          |          |
|---|----------|----------|----------|
| C | 1.00637  | 0.28644  | 1.99963  |
| H | 2.09072  | 0.32823  | 2.18596  |
| H | 0.58075  | 1.29200  | 2.13064  |
| H | 0.53703  | -0.40879 | 2.71823  |
| N | 0.78678  | -0.18278 | 0.61165  |
| O | 2.57711  | -0.19474 | -1.24574 |
| C | -0.62938 | -0.14891 | 0.24529  |
| C | -1.26622 | 1.09373  | 0.15223  |
| C | -1.34492 | -1.31631 | -0.02127 |
| H | -0.69730 | 2.01237  | 0.31581  |
| H | -0.84985 | -2.28712 | 0.02235  |
| C | -2.61483 | 1.15983  | -0.18773 |
| C | -2.69556 | -1.24008 | -0.36406 |
| H | -3.10015 | 2.13652  | -0.26542 |
| H | -3.24702 | -2.16110 | -0.57288 |
| C | -3.33655 | -0.00624 | -0.44377 |
| H | -4.39467 | 0.04905  | -0.71356 |
| F | 1.55450  | 2.29375  | -0.50693 |

#### 4.2bF

|    |          |          |          |
|----|----------|----------|----------|
| C  | 1.43912  | -0.99948 | -1.51450 |
| C  | 2.18383  | -1.16836 | -0.33674 |
| H  | 1.24039  | -1.77020 | -2.26466 |
| H  | 2.77151  | -2.06800 | -0.11357 |
| Be | 1.10244  | 1.00449  | -0.16053 |
| C  | 2.69151  | -0.20027 | 1.82212  |
| H  | 3.40881  | -1.03463 | 1.91466  |
| H  | 3.22035  | 0.74930  | 2.00674  |
| H  | 1.92003  | -0.31138 | 2.60478  |
| N  | 2.07157  | -0.16916 | 0.51888  |
| O  | 0.78908  | 0.12604  | -1.56208 |
| C  | -0.76298 | 0.10920  | -0.30379 |
| C  | -1.67224 | 1.15469  | -0.26340 |
| C  | -1.08442 | -1.19018 | 0.00436  |
| H  | -1.38607 | 2.17164  | -0.54521 |
| H  | -0.33923 | -1.98998 | -0.13720 |
| C  | -2.96154 | 0.86548  | 0.19978  |
| C  | -2.36688 | -1.46820 | 0.47942  |
| H  | -3.70287 | 1.66771  | 0.26420  |
| H  | -2.64284 | -2.49087 | 0.75398  |
| C  | -3.30396 | -0.43499 | 0.57403  |
| H  | -4.31693 | -0.65050 | 0.92550  |
| F  | 1.06987  | 2.43082  | 0.01441  |

#### 4.5bF

|   |         |          |          |
|---|---------|----------|----------|
| C | 1.01383 | -1.46142 | -0.56780 |
|---|---------|----------|----------|

|    |          |          |          |
|----|----------|----------|----------|
| C  | 2.32753  | -1.30886 | -0.30895 |
| H  | 0.45959  | -2.28050 | -1.01884 |
| H  | 3.03615  | -2.13490 | -0.43761 |
| Be | 1.53737  | 0.94288  | 0.08225  |
| C  | 4.14060  | 0.11342  | 0.44782  |
| H  | 4.82669  | -0.20270 | -0.36227 |
| H  | 4.32914  | 1.18115  | 0.64258  |
| H  | 4.41658  | -0.44538 | 1.36406  |
| N  | 2.75427  | -0.07189 | 0.08811  |
| O  | 0.33630  | -0.22649 | -0.41280 |
| C  | -1.02940 | -0.17043 | -0.18249 |
| C  | -1.68241 | 1.01066  | -0.52844 |
| C  | -1.71240 | -1.24002 | 0.38976  |
| H  | -1.11102 | 1.83747  | -0.95485 |
| H  | -1.17747 | -2.14628 | 0.68118  |
| C  | -3.05182 | 1.11348  | -0.29985 |
| C  | -3.08696 | -1.12256 | 0.60264  |
| H  | -3.56986 | 2.03920  | -0.56480 |
| H  | -3.63032 | -1.95844 | 1.05205  |
| C  | -3.76016 | 0.04815  | 0.25968  |
| H  | -4.83604 | 0.13468  | 0.43245  |
| F  | 1.13154  | 2.29164  | 0.29427  |

#### 4.2c

|    |          |          |          |
|----|----------|----------|----------|
| C  | -2.01379 | -1.61844 | -0.86589 |
| C  | -2.59562 | -0.39495 | -0.99806 |
| H  | -2.19565 | -2.49753 | -1.49148 |
| H  | -3.33726 | -0.12293 | -1.75596 |
| Be | -1.03090 | -0.29929 | 0.71438  |
| C  | -2.58457 | 1.88894  | -0.11720 |
| H  | -2.14682 | 2.44387  | -0.97665 |
| H  | -3.68620 | 1.97114  | -0.20565 |
| H  | -2.29192 | 2.42046  | 0.80514  |
| N  | -2.14698 | 0.52539  | -0.05731 |
| O  | -1.11726 | -1.72090 | 0.12900  |
| C  | 0.99954  | 0.07699  | 0.66221  |
| C  | 1.26044  | 1.33108  | 0.16069  |
| C  | 1.74747  | -1.07012 | 0.53661  |
| H  | 0.63214  | 2.19295  | 0.38845  |
| H  | 1.46302  | -2.00228 | 1.02465  |
| C  | 2.35395  | 1.39456  | -0.70776 |
| C  | 2.83091  | -0.95862 | -0.33579 |
| H  | 2.59758  | 2.34771  | -1.18445 |
| H  | 3.44632  | -1.84120 | -0.52958 |
| C  | 3.12915  | 0.25972  | -0.95506 |

|   |          |         |          |
|---|----------|---------|----------|
| H | 3.98473  | 0.32631 | -1.63147 |
| F | -0.12670 | 0.06589 | 1.97669  |

#### 4.3cF

|    |          |          |          |
|----|----------|----------|----------|
| C  | 2.23127  | -1.13639 | -1.17780 |
| C  | 2.33792  | -1.12302 | 0.30873  |
| H  | 2.63274  | -1.98255 | -1.76730 |
| H  | 2.79699  | -1.94837 | 0.87320  |
| Be | 0.85929  | 0.93370  | -0.40941 |
| C  | 1.72563  | 0.13427  | 2.24838  |
| H  | 2.21331  | -0.65862 | 2.84158  |
| H  | 2.17935  | 1.11570  | 2.46374  |
| H  | 0.65493  | 0.20238  | 2.50485  |
| N  | 1.81048  | -0.09292 | 0.83186  |
| O  | 1.67027  | -0.20382 | -1.71505 |
| C  | -0.77492 | 0.29685  | -0.21796 |
| C  | -1.83511 | 1.21684  | -0.11922 |
| C  | -1.12058 | -1.05958 | -0.12849 |
| H  | -1.62251 | 2.29028  | -0.18638 |
| H  | -0.33948 | -1.83476 | -0.19807 |
| C  | -3.15904 | 0.80566  | 0.05724  |
| C  | -2.43724 | -1.49253 | 0.04553  |
| H  | -3.95858 | 1.55062  | 0.12735  |
| H  | -2.66389 | -2.56221 | 0.10743  |
| C  | -3.46424 | -0.55298 | 0.14065  |
| H  | -4.49978 | -0.87985 | 0.27838  |
| F  | 1.34578  | 2.30211  | -0.49468 |

#### 4.4cF

|    |          |          |          |
|----|----------|----------|----------|
| C  | 2.17290  | -1.37951 | -0.71264 |
| C  | 1.94075  | -1.14375 | 0.66190  |
| H  | 2.54982  | -2.33388 | -1.11115 |
| H  | 2.00011  | -1.90409 | 1.44697  |
| Be | 1.18831  | 0.81946  | -0.66972 |
| C  | 1.16010  | 0.55837  | 2.18778  |
| H  | 0.60780  | -0.18389 | 2.78939  |
| H  | 2.12253  | 0.78218  | 2.67943  |
| H  | 0.57620  | 1.48636  | 2.12255  |
| N  | 1.44551  | 0.07437  | 0.85388  |
| O  | 1.85932  | -0.45548 | -1.51009 |
| C  | -0.55263 | 0.11579  | -0.08600 |
| C  | -1.44825 | 1.18243  | -0.01369 |
| C  | -0.99976 | -1.18988 | -0.11177 |
| H  | -1.08848 | 2.21612  | 0.01095  |

|   |          |          |          |
|---|----------|----------|----------|
| H | -0.27567 | -2.02130 | -0.10582 |
| C | -2.82069 | 0.91287  | -0.02503 |
| C | -2.36864 | -1.46214 | -0.13637 |
| H | -3.53600 | 1.74037  | 0.00981  |
| H | -2.72644 | -2.49551 | -0.17650 |
| C | -3.27904 | -0.40399 | -0.08884 |
| H | -4.35369 | -0.60836 | -0.09083 |
| F | 1.28322  | 2.22514  | -0.98271 |

#### 4.4dF

|    |          |          |          |
|----|----------|----------|----------|
| C  | 1.43912  | -0.99948 | -1.51450 |
| C  | 2.18383  | -1.16836 | -0.33674 |
| H  | 1.24039  | -1.77020 | -2.26466 |
| H  | 2.77151  | -2.06800 | -0.11357 |
| Be | 1.10244  | 1.00449  | -0.16053 |
| C  | 2.69151  | -0.20027 | 1.82212  |
| H  | 3.40881  | -1.03463 | 1.91466  |
| H  | 3.22035  | 0.74930  | 2.00674  |
| H  | 1.92003  | -0.31138 | 2.60478  |
| N  | 2.07157  | -0.16916 | 0.51888  |
| O  | 0.78908  | 0.12604  | -1.56208 |
| C  | -0.76298 | 0.10920  | -0.30379 |
| C  | -1.67224 | 1.15469  | -0.26340 |
| C  | -1.08442 | -1.19018 | 0.00436  |
| H  | -1.38607 | 2.17164  | -0.54521 |
| H  | -0.33923 | -1.98998 | -0.13720 |
| C  | -2.96154 | 0.86548  | 0.19978  |
| C  | -2.36688 | -1.46820 | 0.47942  |
| H  | -3.70287 | 1.66771  | 0.26420  |
| H  | -2.64284 | -2.49087 | 0.75398  |
| C  | -3.30396 | -0.43499 | 0.57403  |
| H  | -4.31693 | -0.65050 | 0.92550  |
| F  | 1.06987  | 2.43082  | 0.01441  |

#### 4.1aCl

|    |         |          |          |
|----|---------|----------|----------|
| C  | 2.68091 | 1.83017  | -0.25493 |
| C  | 3.46027 | 0.88825  | 0.32541  |
| H  | 2.91164 | 2.88986  | -0.38863 |
| H  | 4.45362 | 1.06058  | 0.75111  |
| Be | 1.53896 | -0.10060 | -0.37472 |
| C  | 3.58792 | -1.47960 | 0.95761  |
| H  | 3.79240 | -1.29233 | 2.03158  |
| H  | 2.99016 | -2.40467 | 0.89328  |
| H  | 4.56157 | -1.68061 | 0.46587  |

|    |          |          |          |
|----|----------|----------|----------|
| N  | 2.87938  | -0.39258 | 0.34229  |
| O  | 1.48507  | 1.37749  | -0.72552 |
| C  | -1.58269 | -0.45429 | -0.22876 |
| C  | -2.72245 | -1.20509 | 0.03321  |
| C  | -1.52456 | 0.92613  | -0.09521 |
| H  | -2.72080 | -2.29073 | -0.08685 |
| H  | -0.59908 | 1.47413  | -0.30951 |
| C  | -3.86645 | -0.52834 | 0.45492  |
| C  | -2.68328 | 1.57692  | 0.33311  |
| H  | -4.77689 | -1.09469 | 0.66836  |
| H  | -2.66580 | 2.66351  | 0.45201  |
| C  | -3.84702 | 0.85868  | 0.60605  |
| H  | -4.74670 | 1.38240  | 0.93974  |
| Cl | -0.14165 | -1.35611 | -0.78226 |

#### 4.2aCl

|    |          |          |          |
|----|----------|----------|----------|
| C  | -2.59153 | 1.34890  | -0.30441 |
| C  | -1.83302 | 0.75452  | -1.25796 |
| H  | -3.19148 | 2.25159  | -0.47231 |
| H  | -1.70897 | 1.08136  | -2.29225 |
| Be | -1.61499 | -0.34583 | 0.88060  |
| C  | -1.17968 | -1.57984 | -1.62215 |
| H  | -0.57868 | -1.40945 | -2.53300 |
| H  | -0.77759 | -2.44522 | -1.07366 |
| H  | -2.21842 | -1.80552 | -1.91637 |
| N  | -1.18734 | -0.41128 | -0.75897 |
| O  | -2.61557 | 0.82481  | 0.91700  |
| C  | 0.60194  | -0.09365 | -0.16844 |
| C  | 0.84521  | 1.23527  | 0.14739  |
| C  | 1.59628  | -0.94004 | -0.64188 |
| H  | 0.02424  | 1.91907  | 0.38221  |
| H  | 1.37810  | -1.95359 | -0.98110 |
| C  | 2.17102  | 1.66344  | 0.20847  |
| C  | 2.91543  | -0.48974 | -0.57759 |
| H  | 2.38436  | 2.69394  | 0.50712  |
| H  | 3.71923  | -1.16200 | -0.89206 |
| C  | 3.21177  | 0.80124  | -0.13817 |
| H  | 4.24871  | 1.14416  | -0.09651 |
| Cl | -0.11812 | -1.10890 | 1.76181  |

#### 4.5aCl

|   |          |          |          |
|---|----------|----------|----------|
| C | -1.95727 | -1.97976 | -0.52103 |
| C | -1.01688 | -1.89549 | 0.43933  |
| H | -2.42152 | -2.92661 | -0.82479 |

|    |          |          |          |
|----|----------|----------|----------|
| H  | -0.60700 | -2.71484 | 1.03336  |
| Be | -1.66383 | 0.32909  | -0.49173 |
| C  | -0.87579 | -0.11733 | 2.07094  |
| H  | -0.23414 | -0.66729 | 2.78144  |
| H  | -0.73030 | 0.96419  | 2.19745  |
| H  | -1.93200 | -0.35305 | 2.27046  |
| N  | -0.56826 | -0.52966 | 0.67988  |
| O  | -2.36165 | -0.88346 | -1.13769 |
| C  | 0.81833  | -0.25599 | 0.29508  |
| C  | 1.59252  | -1.23515 | -0.33025 |
| C  | 1.36228  | 1.01551  | 0.51334  |
| H  | 1.16878  | -2.22032 | -0.52887 |
| H  | 0.76019  | 1.81168  | 0.95360  |
| C  | 2.90337  | -0.95095 | -0.71416 |
| C  | 2.67190  | 1.28890  | 0.12830  |
| H  | 3.49703  | -1.72912 | -1.20193 |
| H  | 3.08061  | 2.28830  | 0.30051  |
| C  | 3.45195  | 0.30727  | -0.48241 |
| H  | 4.47976  | 0.52657  | -0.78352 |
| Cl | -1.83750 | 2.20102  | -0.48726 |

#### 4.5bCl

|    |          |          |          |
|----|----------|----------|----------|
| C  | 1.22698  | -1.51430 | -0.99057 |
| C  | 2.39702  | -1.35720 | -0.32477 |
| H  | 0.81373  | -2.40220 | -1.46638 |
| H  | 3.10257  | -2.17968 | -0.15848 |
| Be | 1.45422  | 0.78159  | -0.32798 |
| C  | 3.87696  | 0.13880  | 0.90511  |
| H  | 4.79583  | -0.21279 | 0.39701  |
| H  | 3.99797  | 1.21630  | 1.09870  |
| H  | 3.81674  | -0.37079 | 1.88726  |
| N  | 2.69885  | -0.07961 | 0.10184  |
| O  | 0.57925  | -0.30787 | -1.17810 |
| C  | -0.96257 | -0.00683 | -0.26730 |
| C  | -2.03287 | 0.27336  | -1.09475 |
| C  | -1.04459 | -0.69930 | 0.92392  |
| H  | -1.88026 | 0.71850  | -2.07908 |
| H  | -0.14396 | -1.00956 | 1.46063  |
| C  | -3.30206 | 0.02032  | -0.57312 |
| C  | -2.32810 | -0.93821 | 1.42043  |
| H  | -4.18162 | 0.27157  | -1.17317 |
| H  | -2.43946 | -1.43872 | 2.38659  |
| C  | -3.45516 | -0.56857 | 0.68498  |
| H  | -4.45503 | -0.76638 | 1.07909  |
| Cl | 0.05747  | 1.99878  | 0.14636  |

## 4.5bCl

|    |          |          |          |
|----|----------|----------|----------|
| C  | 0.79610  | -1.78673 | -0.52080 |
| C  | 2.12438  | -1.72605 | -0.30846 |
| H  | 0.14756  | -2.58047 | -0.88251 |
| H  | 2.76531  | -2.60846 | -0.41193 |
| Be | 1.50342  | 0.58570  | 0.01959  |
| C  | 4.06097  | -0.39174 | 0.30164  |
| H  | 4.68513  | -0.71998 | -0.55238 |
| H  | 4.30674  | 0.66176  | 0.50820  |
| H  | 4.35677  | -0.98451 | 1.18939  |
| N  | 2.64909  | -0.50376 | 0.01633  |
| O  | 0.22123  | -0.49399 | -0.39776 |
| C  | -1.14492 | -0.34628 | -0.18638 |
| C  | -1.78368 | 0.71732  | -0.81522 |
| C  | -1.83078 | -1.22594 | 0.64561  |
| H  | -1.20943 | 1.39285  | -1.45197 |
| H  | -1.29793 | -2.04199 | 1.13983  |
| C  | -3.14761 | 0.90187  | -0.59975 |
| C  | -3.19863 | -1.03442 | 0.84121  |
| H  | -3.65803 | 1.73872  | -1.08405 |
| H  | -3.74890 | -1.71865 | 1.49286  |
| C  | -3.85879 | 0.02662  | 0.22226  |
| H  | -4.92969 | 0.17470  | 0.38400  |
| Cl | 1.18548  | 2.41257  | 0.30455  |

## 4.2cCl

|    |          |          |          |
|----|----------|----------|----------|
| C  | 2.27600  | -0.45599 | 1.66019  |
| C  | 2.27590  | -1.33073 | 0.59653  |
| H  | 2.64943  | -0.67259 | 2.66683  |
| H  | 2.61788  | -2.36974 | 0.62956  |
| Be | 1.25798  | 0.66426  | -0.05062 |
| C  | 1.53621  | -1.56292 | -1.71001 |
| H  | 0.54937  | -2.07374 | -1.64979 |
| H  | 1.53248  | -0.93126 | -2.61352 |
| H  | 2.30965  | -2.34227 | -1.83667 |
| N  | 1.77544  | -0.76488 | -0.54513 |
| O  | 1.77854  | 0.73868  | 1.41261  |
| C  | -0.79183 | 0.42876  | -0.12403 |
| C  | -1.43200 | -0.31242 | -1.11385 |
| C  | -1.30695 | 0.57921  | 1.16301  |
| H  | -1.04756 | -0.33936 | -2.13558 |
| H  | -0.80457 | 1.20347  | 1.90328  |
| C  | -2.57657 | -1.02622 | -0.76060 |

|    |          |          |          |
|----|----------|----------|----------|
| C  | -2.45496 | -0.14503 | 1.48650  |
| H  | -3.07861 | -1.63694 | -1.51686 |
| H  | -2.85556 | -0.07389 | 2.50208  |
| C  | -3.08748 | -0.94935 | 0.53650  |
| H  | -3.99112 | -1.50383 | 0.80286  |
| Cl | 0.22355  | 2.12799  | -0.96707 |

#### 4.3cCl

|    |          |          |          |
|----|----------|----------|----------|
| C  | -1.93768 | -1.55723 | -1.25880 |
| C  | -2.04036 | -1.69724 | 0.21892  |
| H  | -2.27804 | -2.35705 | -1.94151 |
| H  | -2.45288 | -2.59134 | 0.70749  |
| Be | -0.81065 | 0.52526  | -0.30723 |
| C  | -1.52510 | -0.54616 | 2.25895  |
| H  | -0.46234 | -0.44055 | 2.53494  |
| H  | -2.03011 | 0.39669  | 2.52647  |
| H  | -1.97996 | -1.40151 | 2.78662  |
| N  | -1.58276 | -0.67990 | 0.82901  |
| O  | -1.45159 | -0.52827 | -1.68825 |
| C  | 0.91149  | 0.19492  | -0.18261 |
| C  | 1.81912  | 1.25584  | -0.01200 |
| C  | 1.45955  | -1.09719 | -0.21311 |
| H  | 1.44103  | 2.28420  | 0.01850  |
| H  | 0.80269  | -1.97239 | -0.34371 |
| C  | 3.19291  | 1.03754  | 0.11888  |
| C  | 2.82990  | -1.33525 | -0.08619 |
| H  | 3.87197  | 1.88678  | 0.24835  |
| H  | 3.21933  | -2.35830 | -0.12013 |
| C  | 3.70330  | -0.26037 | 0.08185  |
| H  | 4.77901  | -0.43453 | 0.18423  |
| Cl | -1.73264 | 2.22960  | -0.18970 |

#### 4.4cCl

|    |          |          |          |
|----|----------|----------|----------|
| C  | -1.67769 | -1.92720 | -0.85511 |
| C  | -1.38775 | -1.88546 | 0.52432  |
| H  | -1.87666 | -2.85631 | -1.40957 |
| H  | -1.22239 | -2.75951 | 1.16128  |
| Be | -1.21662 | 0.38468  | -0.43894 |
| C  | -0.92088 | -0.32762 | 2.31538  |
| H  | -0.18351 | -1.01242 | 2.76777  |
| H  | -0.57156 | 0.70915  | 2.40949  |
| H  | -1.88323 | -0.42275 | 2.84672  |
| N  | -1.15772 | -0.63327 | 0.91976  |
| O  | -1.64269 | -0.82832 | -1.47843 |



|    |          |          |          |
|----|----------|----------|----------|
| C  | 0.68797  | 0.03546  | -0.02576 |
| C  | 1.39086  | -1.09719 | -0.38822 |
| C  | 1.35199  | 1.21836  | 0.29974  |
| H  | 0.85887  | -2.04530 | -0.56705 |
| H  | 0.79522  | 2.11302  | 0.59503  |
| C  | 2.77976  | -1.04966 | -0.51706 |
| C  | 2.74466  | 1.26494  | 0.18497  |
| H  | 3.33533  | -1.94017 | -0.82599 |
| H  | 3.27384  | 2.19497  | 0.41361  |
| C  | 3.45592  | 0.13704  | -0.22640 |
| H  | 4.54578  | 0.17876  | -0.30997 |
| Cl | -1.85346 | 2.18525  | -0.45927 |

#### 4.4dCl

|    |          |          |          |
|----|----------|----------|----------|
| C  | 1.07727  | -1.45943 | -1.53152 |
| C  | 1.83943  | -1.73681 | -0.38779 |
| H  | 0.73424  | -2.18730 | -2.27157 |
| H  | 2.31265  | -2.70778 | -0.19442 |
| Be | 1.09221  | 0.55774  | -0.17111 |
| C  | 2.60054  | -0.84216 | 1.73314  |
| H  | 3.13241  | -1.80517 | 1.82574  |
| H  | 3.32631  | -0.01788 | 1.83165  |
| H  | 1.88040  | -0.75588 | 2.56534  |
| N  | 1.90707  | -0.73502 | 0.47134  |
| O  | 0.60284  | -0.24513 | -1.55973 |
| C  | -0.89827 | -0.01281 | -0.30090 |
| C  | -1.68880 | 1.12516  | -0.36417 |
| C  | -1.36862 | -1.23758 | 0.11355  |
| H  | -1.29489 | 2.07361  | -0.73841 |
| H  | -0.72747 | -2.12994 | 0.03869  |
| C  | -2.99854 | 1.02647  | 0.11856  |
| C  | -2.66995 | -1.32419 | 0.60867  |
| H  | -3.64391 | 1.90994  | 0.10449  |
| H  | -3.05794 | -2.27991 | 0.97363  |
| C  | -3.48280 | -0.18669 | 0.60986  |
| H  | -4.51038 | -0.25414 | 0.97801  |
| Cl | 1.46153  | 2.40693  | 0.06785  |

#### 4.1aBr

|    |         |         |          |
|----|---------|---------|----------|
| C  | 2.69941 | 2.03353 | -0.41814 |
| C  | 3.49901 | 1.20551 | 0.29400  |
| H  | 2.90245 | 3.07079 | -0.69592 |
| H  | 4.48318 | 1.46458 | 0.69646  |
| Be | 1.60893 | 0.07340 | -0.26814 |

|    |          |          |          |
|----|----------|----------|----------|
| C  | 3.68457  | -1.04288 | 1.25663  |
| H  | 3.88210  | -0.69499 | 2.29112  |
| H  | 3.10833  | -1.98100 | 1.32993  |
| H  | 4.66370  | -1.29144 | 0.79865  |
| N  | 2.95251  | -0.07459 | 0.48946  |
| O  | 1.52219  | 1.48537  | -0.82703 |
| C  | -1.62723 | -0.24822 | -0.05805 |
| C  | -2.78828 | -0.89643 | 0.35050  |
| C  | -1.52175 | 1.13334  | -0.16079 |
| H  | -2.83467 | -1.98575 | 0.42332  |
| H  | -0.58530 | 1.60934  | -0.47659 |
| C  | -3.89795 | -0.11486 | 0.67223  |
| C  | -2.64676 | 1.89166  | 0.17021  |
| H  | -4.82076 | -0.60242 | 0.99782  |
| H  | -2.58819 | 2.98108  | 0.09951  |
| C  | -3.82781 | 1.27563  | 0.58228  |
| H  | -4.70080 | 1.88254  | 0.83727  |
| Br | -0.12086 | -1.35803 | -0.51920 |

#### 4.2aBr

|    |          |          |          |
|----|----------|----------|----------|
| C  | -2.53993 | -1.50477 | -0.85112 |
| C  | -1.77083 | -1.85683 | 0.20786  |
| H  | -3.11838 | -2.21439 | -1.45495 |
| H  | -1.61398 | -2.86470 | 0.59694  |
| Be | -1.64410 | 0.51718  | -0.24983 |
| C  | -1.16088 | -0.67251 | 2.26375  |
| H  | -0.54146 | -1.47916 | 2.69442  |
| H  | -0.78203 | 0.30401  | 2.60305  |
| H  | -2.19732 | -0.78859 | 2.62247  |
| N  | -1.16539 | -0.71966 | 0.81156  |
| O  | -2.60563 | -0.22308 | -1.19723 |
| C  | 0.62610  | -0.41533 | 0.20361  |
| C  | 1.61719  | -0.29595 | 1.16981  |
| C  | 0.87455  | -0.95213 | -1.05202 |
| H  | 1.39532  | 0.02653  | 2.18803  |
| H  | 0.05733  | -1.17759 | -1.74338 |
| C  | 2.93845  | -0.49917 | 0.77141  |
| C  | 2.20247  | -1.14326 | -1.43229 |
| H  | 3.73981  | -0.35241 | 1.50161  |
| H  | 2.42042  | -1.51036 | -2.43936 |
| C  | 3.23980  | -0.90162 | -0.53079 |
| H  | 4.27872  | -1.06223 | -0.82960 |
| Br | -0.12060 | 1.86634  | -0.15269 |

#### 4.5aBr

|   |         |         |          |
|---|---------|---------|----------|
| C | 1.01807 | 2.68763 | -0.62152 |
|---|---------|---------|----------|

|    |          |          |          |
|----|----------|----------|----------|
| C  | 0.04150  | 2.43994  | 0.27091  |
| H  | 1.21189  | 3.68181  | -1.04283 |
| H  | -0.68066 | 3.14771  | 0.68186  |
| Be | 1.37578  | 0.39882  | -0.31662 |
| C  | 0.36255  | 0.89544  | 2.11687  |
| H  | -0.41518 | 1.32556  | 2.77230  |
| H  | 0.51765  | -0.16746 | 2.35724  |
| H  | 1.30659  | 1.43644  | 2.28205  |
| N  | -0.00049 | 1.04236  | 0.69394  |
| O  | 1.79154  | 1.69476  | -1.03309 |
| C  | -1.21883 | 0.35191  | 0.28780  |
| C  | -1.63193 | 0.47938  | -1.04413 |
| C  | -1.95140 | -0.45293 | 1.15952  |
| H  | -1.06152 | 1.11133  | -1.73064 |
| H  | -1.65442 | -0.58117 | 2.20037  |
| C  | -2.76356 | -0.19067 | -1.49400 |
| C  | -3.08978 | -1.11946 | 0.69977  |
| H  | -3.06925 | -0.08388 | -2.53827 |
| H  | -3.65596 | -1.74676 | 1.39377  |
| C  | -3.50166 | -0.99350 | -0.62264 |
| H  | -4.39190 | -1.51973 | -0.97671 |
| Br | 1.95631  | -1.53257 | -0.14974 |

#### 4.2bBr

|    |          |          |          |
|----|----------|----------|----------|
| C  | -1.19187 | -1.89092 | -0.98579 |
| C  | -2.35545 | -1.75916 | -0.30046 |
| H  | -0.75908 | -2.77854 | -1.44521 |
| H  | -3.03259 | -2.59885 | -0.10484 |
| Be | -1.47990 | 0.40665  | -0.37645 |
| C  | -3.86303 | -0.27561 | 0.91248  |
| H  | -3.79060 | -0.77924 | 1.89674  |
| H  | -3.99637 | 0.80131  | 1.10083  |
| H  | -4.77968 | -0.64237 | 0.41110  |
| N  | -2.68605 | -0.48283 | 0.10452  |
| O  | -0.58185 | -0.67663 | -1.20352 |
| C  | 0.99408  | -0.32063 | -0.26370 |
| C  | 1.05237  | -0.97678 | 0.94829  |
| C  | 2.06883  | -0.10062 | -1.10248 |
| H  | 0.14450  | -1.24424 | 1.49583  |
| H  | 1.93051  | 0.31772  | -2.10059 |
| C  | 2.32918  | -1.23829 | 1.45220  |
| C  | 3.33022  | -0.37620 | -0.57244 |
| H  | 2.42610  | -1.71007 | 2.43427  |
| H  | 4.21638  | -0.17119 | -1.18020 |
| C  | 3.46592  | -0.92681 | 0.70497  |

|    |          |          |         |
|----|----------|----------|---------|
| H  | 4.45962  | -1.14154 | 1.10569 |
| Br | -0.06924 | 1.83724  | 0.05801 |

#### 4.5bBr

|    |          |          |          |
|----|----------|----------|----------|
| C  | -0.26265 | 2.27969  | -0.49529 |
| C  | -1.58295 | 2.42197  | -0.27572 |
| H  | 0.50629  | 2.97758  | -0.81648 |
| H  | -2.07571 | 3.39866  | -0.33205 |
| Be | -1.33640 | 0.02881  | -0.06599 |
| C  | -3.70588 | 1.38618  | 0.29056  |
| H  | -4.26484 | 1.88951  | -0.52209 |
| H  | -4.12830 | 0.37614  | 0.41024  |
| H  | -3.89428 | 1.94084  | 1.23050  |
| N  | -2.29581 | 1.28296  | -0.00831 |
| O  | 0.09995  | 0.90759  | -0.43847 |
| C  | 1.42482  | 0.54874  | -0.20528 |
| C  | 1.94204  | -0.52746 | -0.91750 |
| C  | 2.18385  | 1.24491  | 0.72998  |
| H  | 1.31166  | -1.05535 | -1.63573 |
| H  | 1.74059  | 2.07636  | 1.28354  |
| C  | 3.26006  | -0.91393 | -0.68111 |
| C  | 3.50462  | 0.85337  | 0.94626  |
| H  | 3.67686  | -1.76228 | -1.23046 |
| H  | 4.11202  | 1.39293  | 1.67804  |
| C  | 4.04439  | -0.22407 | 0.24417  |
| H  | 5.07918  | -0.52915 | 0.42056  |
| Br | -1.32276 | -1.98509 | 0.15793  |

#### 4.2cBr

|    |          |          |          |
|----|----------|----------|----------|
| C  | -2.25487 | -1.49194 | -1.46230 |
| C  | -2.38874 | -1.83315 | -0.13313 |
| H  | -2.64217 | -2.06376 | -2.31239 |
| H  | -2.88019 | -2.73601 | 0.24295  |
| Be | -1.12631 | 0.12157  | -0.29954 |
| C  | -1.71798 | -1.15504 | 2.10958  |
| H  | -0.77996 | -1.70171 | 2.35330  |
| H  | -1.70128 | -0.20122 | 2.66277  |
| H  | -2.56417 | -1.75783 | 2.48674  |
| N  | -1.82195 | -0.91197 | 0.70192  |
| O  | -1.59777 | -0.37527 | -1.69616 |
| C  | 0.87730  | 0.09118  | -0.04568 |
| C  | 1.42138  | -0.31855 | 1.17347  |
| C  | 1.51904  | -0.15970 | -1.26245 |
| H  | 0.94648  | -0.04780 | 2.11929  |

|    |          |          |          |
|----|----------|----------|----------|
| H  | 1.09891  | 0.20712  | -2.20103 |
| C  | 2.57825  | -1.09590 | 1.15971  |
| C  | 2.67366  | -0.93916 | -1.25060 |
| H  | 2.99761  | -1.44771 | 2.10699  |
| H  | 3.16354  | -1.17747 | -2.19920 |
| C  | 3.20367  | -1.41226 | -0.04753 |
| H  | 4.11628  | -2.01428 | -0.05033 |
| Br | -0.20527 | 2.04936  | 0.09139  |

#### 4.3cBr

|    |          |          |          |
|----|----------|----------|----------|
| C  | 1.12381  | 2.24655  | -1.31320 |
| C  | 1.17872  | 2.46969  | 0.15601  |
| H  | 1.28071  | 3.07032  | -2.03285 |
| H  | 1.37581  | 3.45236  | 0.60703  |
| Be | 0.52479  | 0.00249  | -0.26637 |
| C  | 0.93307  | 1.31942  | 2.24577  |
| H  | -0.07418 | 0.97628  | 2.53637  |
| H  | 1.64873  | 0.53756  | 2.54965  |
| H  | 1.16981  | 2.28101  | 2.73141  |
| N  | 0.96178  | 1.40062  | 0.81035  |
| O  | 0.89119  | 1.11444  | -1.69382 |
| C  | -1.21691 | -0.15967 | -0.16165 |
| C  | -1.81041 | -1.42397 | 0.00353  |
| C  | -2.08984 | 0.93986  | -0.20740 |
| H  | -1.17205 | -2.31410 | 0.04439  |
| H  | -1.68809 | 1.95723  | -0.33798 |
| C  | -3.19416 | -1.58031 | 0.11549  |
| C  | -3.47545 | 0.80312  | -0.09787 |
| H  | -3.62346 | -2.57971 | 0.24166  |
| H  | -4.12326 | 1.68517  | -0.14065 |
| C  | -4.03187 | -0.46561 | 0.06593  |
| H  | -5.11618 | -0.58550 | 0.15473  |
| Br | 1.99598  | -1.48871 | -0.06428 |

#### 4.4cBr

|    |          |          |          |
|----|----------|----------|----------|
| C  | 0.37905  | 2.61343  | -0.90723 |
| C  | 0.05555  | 2.52974  | 0.46151  |
| H  | 0.22295  | 3.51435  | -1.51871 |
| H  | -0.47651 | 3.29525  | 1.03397  |
| Be | 0.85937  | 0.33985  | -0.34649 |
| C  | 0.17135  | 1.00926  | 2.34321  |
| H  | 0.27998  | -0.07240 | 2.49806  |
| H  | 0.98314  | 1.52234  | 2.88665  |
| H  | -0.80277 | 1.34862  | 2.73449  |

|    |          |          |          |
|----|----------|----------|----------|
| N  | 0.32583  | 1.31202  | 0.93529  |
| O  | 0.82086  | 1.56180  | -1.45430 |
| C  | -1.04416 | -0.08962 | -0.00090 |
| C  | -1.21241 | -1.40898 | 0.42037  |
| C  | -2.11033 | 0.63949  | -0.49240 |
| H  | -0.37221 | -1.98397 | 0.82128  |
| H  | -1.98413 | 1.70430  | -0.74408 |
| C  | -2.46411 | -2.01269 | 0.26826  |
| C  | -3.35678 | 0.03483  | -0.65943 |
| H  | -2.60081 | -3.05497 | 0.57173  |
| H  | -4.19486 | 0.60441  | -1.07179 |
| C  | -3.53113 | -1.29623 | -0.27503 |
| H  | -4.50899 | -1.77317 | -0.38776 |
| Br | 2.28134  | -1.15023 | -0.20859 |

#### 4.4dBr

|    |          |          |          |
|----|----------|----------|----------|
| C  | 0.08212  | 2.07305  | -1.50748 |
| C  | 0.72996  | 2.58204  | -0.37350 |
| H  | -0.51426 | 2.64358  | -2.22413 |
| H  | 0.84286  | 3.65394  | -0.16817 |
| Be | 0.84138  | 0.17143  | -0.20042 |
| C  | 1.83448  | 1.97559  | 1.69915  |
| H  | 1.21500  | 1.65217  | 2.55376  |
| H  | 2.79334  | 1.43443  | 1.75829  |
| H  | 2.02387  | 3.05929  | 1.79090  |
| N  | 1.17024  | 1.65374  | 0.45799  |
| O  | 0.06994  | 0.76907  | -1.55845 |
| C  | -1.22372 | -0.01110 | -0.29826 |
| C  | -1.56914 | -1.35065 | -0.40190 |
| C  | -2.08744 | 0.95765  | 0.15968  |
| H  | -0.87635 | -2.08918 | -0.81371 |
| H  | -1.80267 | 2.02027  | 0.10983  |
| C  | -2.82220 | -1.73311 | 0.08923  |
| C  | -3.32891 | 0.56645  | 0.66182  |
| H  | -3.11714 | -2.78569 | 0.04444  |
| H  | -4.02195 | 1.31427  | 1.05863  |
| C  | -3.69220 | -0.78301 | 0.62600  |
| H  | -4.67248 | -1.09192 | 0.99965  |
| Br | 1.95644  | -1.53963 | 0.02930  |

#### 4.1al

|   |         |         |          |
|---|---------|---------|----------|
| C | 2.71036 | 2.19654 | -0.65113 |
| C | 3.50749 | 1.53472 | 0.22061  |
| H | 2.87736 | 3.18957 | -1.07609 |

|    |          |          |          |
|----|----------|----------|----------|
| H  | 4.45041  | 1.91186  | 0.62885  |
| Be | 1.71530  | 0.21495  | -0.25985 |
| C  | 3.74860  | -0.52723 | 1.52611  |
| H  | 3.87375  | -0.01169 | 2.50004  |
| H  | 3.21055  | -1.47086 | 1.72062  |
| H  | 4.76149  | -0.79362 | 1.16081  |
| N  | 3.01749  | 0.26887  | 0.58095  |
| O  | 1.59155  | 1.52324  | -1.03236 |
| C  | -1.69317 | -0.01075 | 0.03683  |
| C  | -2.89928 | -0.51467 | 0.51840  |
| C  | -1.48972 | 1.34281  | -0.21254 |
| H  | -3.03757 | -1.58187 | 0.70950  |
| H  | -0.52782 | 1.71600  | -0.58654 |
| C  | -3.94180 | 0.38052  | 0.76012  |
| C  | -2.54788 | 2.21865  | 0.04069  |
| H  | -4.89475 | 0.00264  | 1.14096  |
| H  | -2.40627 | 3.28670  | -0.14528 |
| C  | -3.76684 | 1.74379  | 0.52296  |
| H  | -4.58646 | 2.44098  | 0.71700  |
| I  | -0.11704 | -1.39252 | -0.34171 |

#### 4.2aI

|    |          |          |          |
|----|----------|----------|----------|
| C  | -2.41320 | -1.96718 | -0.89750 |
| C  | -1.67215 | -2.27640 | 0.19552  |
| H  | -2.92891 | -2.70659 | -1.52200 |
| H  | -1.47636 | -3.27373 | 0.59390  |
| Be | -1.66835 | 0.10870  | -0.24445 |
| C  | -1.13028 | -1.08217 | 2.26403  |
| H  | -0.48378 | -1.87626 | 2.67771  |
| H  | -0.77709 | -0.09868 | 2.61152  |
| H  | -2.15902 | -1.23202 | 2.63270  |
| N  | -1.14908 | -1.11135 | 0.81269  |
| O  | -2.52802 | -0.69172 | -1.24735 |
| C  | 0.66951  | -0.71323 | 0.20152  |
| C  | 0.92873  | -1.19782 | -1.07169 |
| C  | 1.65112  | -0.61364 | 1.17833  |
| H  | 0.12011  | -1.41596 | -1.77545 |
| H  | 1.41893  | -0.33765 | 2.20802  |
| C  | 2.26227  | -1.33811 | -1.45603 |
| C  | 2.97775  | -0.76741 | 0.77652  |
| H  | 2.49221  | -1.65588 | -2.47704 |
| H  | 3.77409  | -0.63164 | 1.51416  |
| C  | 3.29036  | -1.10534 | -0.54180 |
| H  | 4.33359  | -1.22586 | -0.84454 |
| I  | -0.16523 | 1.76793  | -0.08009 |

## 4.5aI

|    |          |          |          |
|----|----------|----------|----------|
| C  | -0.17683 | 3.04272  | -0.66365 |
| C  | -1.05403 | 2.53103  | 0.21915  |
| H  | -0.27989 | 4.04080  | -1.10696 |
| H  | -1.96289 | 2.99742  | 0.60323  |
| Be | 0.83889  | 0.97175  | -0.29379 |
| C  | -0.33449 | 1.20204  | 2.11540  |
| H  | -1.22573 | 1.39761  | 2.73736  |
| H  | 0.12364  | 0.24226  | 2.39895  |
| H  | 0.39917  | 2.00577  | 2.27965  |
| N  | -0.68471 | 1.19409  | 0.68071  |
| O  | 0.86830  | 2.31914  | -1.03701 |
| C  | -1.63473 | 0.16171  | 0.27877  |
| C  | -2.05883 | 0.14170  | -1.05548 |
| C  | -2.09108 | -0.81814 | 1.15982  |
| H  | -1.70653 | 0.90887  | -1.75053 |
| H  | -1.77412 | -0.83773 | 2.20250  |
| C  | -2.92893 | -0.84778 | -1.49861 |
| C  | -2.96844 | -1.80607 | 0.70665  |
| H  | -3.24676 | -0.85259 | -2.54476 |
| H  | -3.31867 | -2.56793 | 1.40845  |
| C  | -3.39125 | -1.82722 | -0.61811 |
| H  | -4.07636 | -2.60431 | -0.96682 |
| I  | 2.10171  | -0.87187 | -0.08337 |

## 4.2bI

|    |          |          |          |
|----|----------|----------|----------|
| C  | -1.14417 | -2.21640 | -1.02321 |
| C  | -2.29868 | -2.13345 | -0.31351 |
| H  | -0.68650 | -3.08602 | -1.49311 |
| H  | -2.94242 | -2.99821 | -0.11434 |
| Be | -1.50689 | 0.06602  | -0.40392 |
| C  | -3.82887 | -0.71159 | 0.94467  |
| H  | -3.71833 | -1.21805 | 1.92375  |
| H  | -3.99360 | 0.35930  | 1.14186  |
| H  | -4.74231 | -1.10689 | 0.45962  |
| N  | -2.66249 | -0.87419 | 0.11121  |
| O  | -0.57474 | -0.98463 | -1.23250 |
| C  | 1.00744  | -0.61130 | -0.26166 |
| C  | 1.04016  | -1.25601 | 0.95838  |
| C  | 2.09351  | -0.44730 | -1.10051 |
| H  | 0.12359  | -1.48916 | 1.50711  |
| H  | 1.97535  | -0.04479 | -2.10780 |
| C  | 2.30574  | -1.54468 | 1.47553  |



|   |          |          |          |
|---|----------|----------|----------|
| C | 3.34316  | -0.74901 | -0.55821 |
| H | 2.38283  | -2.00202 | 2.46613  |
| H | 4.23822  | -0.58270 | -1.16463 |
| C | 3.45546  | -1.27785 | 0.73098  |
| H | 4.44021  | -1.51301 | 1.14220  |
| I | -0.06899 | 1.75659  | 0.03437  |

4.5bl

|    |          |          |          |
|----|----------|----------|----------|
| C  | 0.48472  | 2.59975  | -0.42658 |
| C  | -0.78388 | 3.00668  | -0.23567 |
| H  | 1.39623  | 3.12849  | -0.69287 |
| H  | -1.06082 | 4.06615  | -0.26405 |
| Be | -1.03788 | 0.61032  | -0.10486 |
| C  | -3.09362 | 2.41236  | 0.23620  |
| H  | -3.50694 | 3.05691  | -0.56334 |
| H  | -3.71812 | 1.50699  | 0.29281  |
| H  | -3.19582 | 2.95111  | 1.19826  |
| N  | -1.72536 | 2.03155  | -0.03217 |
| O  | 0.55140  | 1.17965  | -0.41042 |
| C  | 1.77365  | 0.54624  | -0.19445 |
| C  | 2.10045  | -0.53285 | -1.00687 |
| C  | 2.61342  | 0.98283  | 0.82467  |
| H  | 1.40928  | -0.84994 | -1.79045 |
| H  | 2.31650  | 1.82577  | 1.45391  |
| C  | 3.30765  | -1.19385 | -0.78634 |
| C  | 3.82313  | 0.31909  | 1.02515  |
| H  | 3.57450  | -2.04799 | -1.41447 |
| H  | 4.49366  | 0.65126  | 1.82234  |
| C  | 4.17131  | -0.76827 | 0.22349  |
| H  | 5.11899  | -1.28767 | 0.38813  |
| I  | -1.53567 | -1.57231 | 0.10453  |

4.2cl

|    |          |          |          |
|----|----------|----------|----------|
| C  | -2.24774 | -1.94266 | -1.47340 |
| C  | -2.46988 | -2.18525 | -0.13793 |
| H  | -2.70348 | -2.48291 | -2.30970 |
| H  | -3.12750 | -2.96321 | 0.26329  |
| Be | -0.93731 | -0.44740 | -0.35142 |
| C  | -1.78545 | -1.47904 | 2.10161  |
| H  | -0.91584 | -2.07712 | 2.45197  |
| H  | -1.72986 | -0.49371 | 2.59610  |
| H  | -2.70229 | -1.98414 | 2.45699  |
| N  | -1.77582 | -1.32787 | 0.67646  |
| O  | -1.40550 | -0.95717 | -1.73852 |

|   |          |          |          |
|---|----------|----------|----------|
| C | 0.98914  | -0.14758 | -0.04422 |
| C | 1.49380  | -0.58210 | 1.19004  |
| C | 1.71006  | -0.36051 | -1.22876 |
| H | 0.95422  | -0.37195 | 2.11719  |
| H | 1.32427  | 0.00629  | -2.18321 |
| C | 2.67794  | -1.31325 | 1.22125  |
| C | 2.89033  | -1.09631 | -1.17910 |
| H | 3.06006  | -1.67784 | 2.17922  |
| H | 3.43516  | -1.29731 | -2.10588 |
| C | 3.37662  | -1.57410 | 0.04042  |
| H | 4.31079  | -2.14143 | 0.07204  |
| I | -0.26963 | 1.85491  | 0.03964  |

#### 4.3cl

|    |          |          |          |
|----|----------|----------|----------|
| C  | 0.42366  | 2.58735  | -1.31739 |
| C  | 0.41338  | 2.82808  | 0.14671  |
| H  | 0.51842  | 3.41086  | -2.04698 |
| H  | 0.49394  | 3.82847  | 0.59360  |
| Be | 0.10846  | 0.30380  | -0.27373 |
| C  | 0.25168  | 1.67469  | 2.24295  |
| H  | -0.71621 | 1.22073  | 2.51468  |
| H  | 1.04583  | 0.98570  | 2.57557  |
| H  | 0.36528  | 2.66284  | 2.71929  |
| N  | 0.30630  | 1.74365  | 0.80655  |
| O  | 0.32498  | 1.42950  | -1.68548 |
| C  | -1.55298 | -0.22311 | -0.17069 |
| C  | -1.89657 | -1.57561 | 0.00413  |
| C  | -2.61933 | 0.69139  | -0.22872 |
| H  | -1.10262 | -2.32941 | 0.05550  |
| H  | -2.41802 | 1.76479  | -0.36736 |
| C  | -3.22602 | -1.99077 | 0.11394  |
| C  | -3.95398 | 0.29401  | -0.12268 |
| H  | -3.45663 | -3.05245 | 0.24952  |
| H  | -4.75695 | 1.03665  | -0.17624 |
| C  | -4.25964 | -1.05593 | 0.05114  |
| H  | -5.30207 | -1.37844 | 0.13738  |
| I  | 2.05038  | -0.98844 | -0.03091 |

#### 4.4cl

|    |          |         |          |
|----|----------|---------|----------|
| C  | -0.54941 | 2.75321 | -0.90802 |
| C  | -0.88330 | 2.60538 | 0.45068  |
| H  | -0.86441 | 3.60478 | -1.52861 |
| H  | -1.56933 | 3.24850 | 1.00924  |
| Be | 0.37031  | 0.63168 | -0.32370 |

|   |          |          |          |
|---|----------|----------|----------|
| C | -0.49692 | 1.15376  | 2.34971  |
| H | -0.16499 | 0.12173  | 2.52458  |
| H | 0.17540  | 1.83340  | 2.90028  |
| H | -1.52914 | 1.28342  | 2.71649  |
| N | -0.38152 | 1.46695  | 0.93971  |
| O | 0.11081  | 1.81125  | -1.43909 |
| C | -1.40990 | -0.18619 | 0.00411  |
| C | -1.33510 | -1.49791 | 0.47390  |
| C | -2.57770 | 0.30161  | -0.55235 |
| H | -0.41882 | -1.88502 | 0.92982  |
| H | -2.65534 | 1.36136  | -0.84059 |
| C | -2.43693 | -2.34130 | 0.30458  |
| C | -3.67271 | -0.54303 | -0.73802 |
| H | -2.37899 | -3.37815 | 0.64896  |
| H | -4.58751 | -0.16289 | -1.20203 |
| C | -3.59939 | -1.86852 | -0.30525 |
| H | -4.45943 | -2.53250 | -0.43085 |
| I | 2.27403  | -0.62344 | -0.13158 |

#### 4.4dl

|    |          |          |          |
|----|----------|----------|----------|
| C  | 0.90534  | 2.17493  | 1.51190  |
| C  | 0.39957  | 2.85054  | 0.39412  |
| H  | 1.64958  | 2.55136  | 2.21822  |
| H  | 0.58132  | 3.91392  | 0.19425  |
| Be | -0.37234 | 0.56702  | 0.21518  |
| C  | -0.87278 | 2.59467  | -1.65451 |
| H  | -0.40363 | 2.10363  | -2.52466 |
| H  | -1.95093 | 2.36453  | -1.68292 |
| H  | -0.73307 | 3.68576  | -1.74682 |
| N  | -0.29720 | 2.08645  | -0.43081 |
| O  | 0.55506  | 0.91743  | 1.56222  |
| C  | 1.55359  | -0.19237 | 0.29419  |
| C  | 1.54878  | -1.56930 | 0.46461  |
| C  | 2.62283  | 0.49734  | -0.23375 |
| H  | 0.70906  | -2.08292 | 0.93971  |
| H  | 2.62687  | 1.59782  | -0.23274 |
| C  | 2.64213  | -2.28590 | -0.03304 |
| C  | 3.70125  | -0.22547 | -0.74390 |
| H  | 2.65965  | -3.37519 | 0.06614  |
| H  | 4.54745  | 0.29767  | -1.19888 |
| C  | 3.70583  | -1.61981 | -0.64336 |
| H  | 4.55938  | -2.18879 | -1.02215 |
| I  | -2.11992 | -0.87600 | -0.02812 |

#### 5.1aF

|   |         |          |         |
|---|---------|----------|---------|
| C | 3.27654 | -1.26787 | 0.00846 |
|---|---------|----------|---------|

|    |          |          |          |
|----|----------|----------|----------|
| C  | 3.51026  | 0.03841  | 0.27245  |
| H  | 4.04585  | -2.04048 | 0.05809  |
| H  | 4.50482  | 0.40319  | 0.56030  |
| Be | 1.20623  | 0.16654  | -0.26375 |
| C  | 2.74671  | 2.34011  | 0.47101  |
| H  | 3.48125  | 2.77927  | -0.23346 |
| H  | 1.81973  | 2.93298  | 0.39296  |
| H  | 3.14287  | 2.47915  | 1.49661  |
| N  | 2.47024  | 0.95559  | 0.17837  |
| S  | 1.62870  | -1.73602 | -0.46150 |
| C  | -1.60998 | 0.42360  | -0.15454 |
| C  | -1.75076 | -0.80147 | 0.46549  |
| C  | -2.65310 | 1.24311  | -0.53918 |
| H  | -0.87477 | -1.40093 | 0.73350  |
| H  | -2.45807 | 2.20041  | -1.02642 |
| C  | -3.05577 | -1.23191 | 0.71478  |
| C  | -3.94609 | 0.78898  | -0.27744 |
| H  | -3.21187 | -2.19822 | 1.20088  |
| H  | -4.80045 | 1.40641  | -0.56676 |
| C  | -4.14644 | -0.44369 | 0.34652  |
| H  | -5.16254 | -0.79337 | 0.54565  |
| F  | -0.32119 | 0.90189  | -0.42402 |

#### 5.2aF

|    |          |          |          |
|----|----------|----------|----------|
| C  | -2.32214 | -0.58307 | -1.16020 |
| C  | -1.43161 | 0.39846  | -1.43481 |
| H  | -2.78071 | -1.18495 | -1.94948 |
| H  | -1.13112 | 0.65186  | -2.45844 |
| Be | -1.39360 | 0.40615  | 0.99437  |
| C  | -0.32597 | 2.40767  | -0.65734 |
| H  | -1.07918 | 3.05025  | -1.14842 |
| H  | -0.02282 | 2.90531  | 0.27757  |
| H  | 0.56186  | 2.34629  | -1.31795 |
| N  | -0.87040 | 1.10134  | -0.37045 |
| S  | -2.79054 | -0.91533 | 0.51572  |
| C  | 0.90174  | 0.04987  | 0.48455  |
| C  | 0.88645  | -1.24250 | -0.00144 |
| C  | 2.01048  | 0.86477  | 0.57106  |
| H  | -0.02691 | -1.84203 | -0.01640 |
| H  | 1.96443  | 1.84955  | 1.03684  |
| C  | 2.09218  | -1.71454 | -0.52566 |
| C  | 3.19699  | 0.35818  | 0.03219  |
| H  | 2.11907  | -2.72288 | -0.94853 |
| H  | 4.09707  | 0.97907  | 0.06358  |
| C  | 3.24218  | -0.92278 | -0.51783 |

|   |          |          |          |
|---|----------|----------|----------|
| H | 4.17713  | -1.31093 | -0.92905 |
| F | -0.11829 | 0.32148  | 1.89014  |

5.5aF

|    |          |          |          |
|----|----------|----------|----------|
| C  | 2.22703  | -1.44801 | 0.12482  |
| C  | 1.22551  | -1.17934 | 0.97340  |
| H  | 2.78866  | -2.38246 | 0.23044  |
| H  | 0.92395  | -1.83545 | 1.79656  |
| Be | 1.37957  | 0.98557  | -0.46361 |
| C  | 0.55978  | 0.84768  | 2.08199  |
| H  | 1.61837  | 0.97526  | 2.35592  |
| H  | 0.10998  | 1.83966  | 1.93962  |
| H  | 0.02945  | 0.31051  | 2.88796  |
| N  | 0.49999  | 0.06921  | 0.81956  |
| S  | 2.69567  | -0.35549 | -1.16297 |
| C  | -0.87292 | -0.08512 | 0.32299  |
| C  | -1.62719 | 1.06244  | 0.05086  |
| C  | -1.42117 | -1.34570 | 0.08324  |
| H  | -1.19000 | 2.05421  | 0.18253  |
| H  | -0.83302 | -2.24668 | 0.26113  |
| C  | -2.92617 | 0.94022  | -0.43458 |
| C  | -2.72327 | -1.45687 | -0.40576 |
| H  | -3.50198 | 1.84466  | -0.64890 |
| H  | -3.14194 | -2.45013 | -0.58980 |
| C  | -3.48309 | -0.31837 | -0.66049 |
| H  | -4.50194 | -0.41031 | -1.04615 |
| F  | 1.08871  | 2.38446  | -0.60701 |

5.2bF

|    |          |          |          |
|----|----------|----------|----------|
| C  | 1.72419  | 1.08891  | -1.38747 |
| C  | 2.44981  | -0.01643 | -1.05153 |
| H  | 1.75088  | 1.54278  | -2.37931 |
| H  | 3.10693  | -0.50572 | -1.78356 |
| Be | 1.26410  | 0.24950  | 1.01405  |
| C  | 3.11591  | -1.74220 | 0.51817  |
| H  | 4.20516  | -1.59239 | 0.38949  |
| H  | 2.94225  | -2.03095 | 1.56736  |
| H  | 2.81545  | -2.60024 | -0.11598 |
| N  | 2.36487  | -0.54644 | 0.21121  |
| S  | 0.74398  | 1.82060  | -0.13159 |
| C  | -1.06258 | 0.00158  | 0.45077  |
| C  | -2.20338 | 0.62340  | 0.90757  |
| C  | -0.98812 | -0.98897 | -0.50261 |
| H  | -2.17190 | 1.37189  | 1.70048  |

|   |          |          |          |
|---|----------|----------|----------|
| H | -0.03929 | -1.43906 | -0.80358 |
| C | -3.38830 | 0.26567  | 0.26233  |
| C | -2.19985 | -1.32299 | -1.11920 |
| H | -4.32026 | 0.75276  | 0.56321  |
| H | -2.19431 | -2.08221 | -1.90649 |
| C | -3.39137 | -0.70304 | -0.74527 |
| H | -4.32836 | -0.97825 | -1.23527 |
| F | 0.04237  | -0.21964 | 1.84198  |

#### 5.5bF

|    |          |          |          |
|----|----------|----------|----------|
| C  | 1.35672  | -1.48296 | -1.03409 |
| C  | 2.27043  | -1.21071 | -0.05630 |
| H  | 1.27053  | -2.43812 | -1.55137 |
| H  | 2.95923  | -2.00534 | 0.26635  |
| Be | 1.41211  | 1.14742  | -0.02791 |
| C  | 3.36116  | 0.17248  | 1.58775  |
| H  | 4.37920  | -0.10225 | 1.25236  |
| H  | 3.38567  | 1.23025  | 1.89394  |
| H  | 3.11782  | -0.42867 | 2.48464  |
| N  | 2.37763  | -0.00118 | 0.53454  |
| S  | 0.37114  | -0.12337 | -1.53915 |
| C  | -1.11398 | -0.17593 | -0.50486 |
| C  | -2.04766 | 0.84743  | -0.68405 |
| C  | -1.32823 | -1.17835 | 0.43814  |
| H  | -1.86664 | 1.63742  | -1.41913 |
| H  | -0.58197 | -1.96685 | 0.56953  |
| C  | -3.20658 | 0.85978  | 0.08926  |
| C  | -2.49318 | -1.15733 | 1.20563  |
| H  | -3.93731 | 1.66175  | -0.04777 |
| H  | -2.66332 | -1.94344 | 1.94695  |
| C  | -3.43368 | -0.14255 | 1.03349  |
| H  | -4.34505 | -0.13017 | 1.63764  |
| F  | 1.09574  | 2.52075  | 0.16814  |

#### 5.1aCl

|    |         |          |          |
|----|---------|----------|----------|
| C  | 3.30745 | -1.04342 | 0.54230  |
| C  | 3.14026 | 0.20182  | 1.04646  |
| H  | 4.08776 | -1.72874 | 0.87881  |
| H  | 3.78700 | 0.59874  | 1.83960  |
| Be | 1.40418 | 0.20667  | -0.56807 |
| C  | 1.95013 | 2.32227  | 1.12408  |
| H  | 2.84218 | 2.96424  | 0.98310  |
| H  | 1.09770 | 2.83074  | 0.64305  |
| H  | 1.73908 | 2.27478  | 2.21075  |

|    |          |          |          |
|----|----------|----------|----------|
| N  | 2.12670  | 1.01148  | 0.54928  |
| S  | 2.21089  | -1.56681 | -0.74953 |
| C  | -1.70216 | 0.18973  | -0.48278 |
| C  | -1.51016 | -1.03388 | 0.14386  |
| C  | -2.86576 | 0.93820  | -0.35669 |
| H  | -0.57201 | -1.58692 | 0.02691  |
| H  | -2.97465 | 1.89758  | -0.86709 |
| C  | -2.54503 | -1.52161 | 0.94254  |
| C  | -3.88743 | 0.42697  | 0.44367  |
| H  | -2.41597 | -2.48092 | 1.45028  |
| H  | -4.81358 | 0.99606  | 0.55962  |
| C  | -3.72805 | -0.79817 | 1.09181  |
| H  | -4.53192 | -1.19016 | 1.72033  |
| Cl | -0.41641 | 0.85266  | -1.52923 |

#### 5.2aCl

|    |          |          |          |
|----|----------|----------|----------|
| C  | 2.17649  | -1.53961 | 0.55955  |
| C  | 1.36361  | -0.93570 | 1.46364  |
| H  | 2.54871  | -2.55737 | 0.70365  |
| H  | 1.02878  | -1.43182 | 2.38214  |
| Be | 1.47651  | 0.79531  | -0.24840 |
| C  | 0.34832  | 1.10410  | 2.28089  |
| H  | 1.07241  | 1.23756  | 3.10592  |
| H  | 0.05884  | 2.10623  | 1.92633  |
| H  | -0.55155 | 0.60314  | 2.68949  |
| N  | 0.93781  | 0.35399  | 1.20062  |
| S  | 2.68648  | -0.65024 | -0.87459 |
| C  | -0.94281 | 0.27705  | -0.27053 |
| C  | -2.04226 | 0.81348  | 0.36882  |
| C  | -0.89696 | -0.95021 | -0.90127 |
| H  | -2.03389 | 1.81369  | 0.80283  |
| H  | 0.00197  | -1.32291 | -1.39572 |
| C  | -3.18338 | 0.00772  | 0.42700  |
| C  | -2.06270 | -1.72135 | -0.82871 |
| H  | -4.07285 | 0.39301  | 0.93398  |
| H  | -2.06209 | -2.70877 | -1.29931 |
| C  | -3.19774 | -1.25423 | -0.16758 |
| H  | -4.09955 | -1.86997 | -0.12379 |
| Cl | 0.19291  | 1.98084  | -1.21962 |

#### 5.5aCl

|   |         |          |         |
|---|---------|----------|---------|
| C | 2.05233 | -1.82757 | 0.20132 |
| C | 0.96417 | -1.57705 | 0.93929 |
| H | 2.52529 | -2.81422 | 0.24415 |

|    |          |          |          |
|----|----------|----------|----------|
| H  | 0.47483  | -2.29728 | 1.60245  |
| Be | 1.36361  | 0.69347  | -0.29388 |
| C  | 0.52845  | 0.43192  | 2.18956  |
| H  | 1.59653  | 0.40873  | 2.45526  |
| H  | 0.20436  | 1.48021  | 2.10853  |
| H  | -0.04949 | -0.09025 | 2.97186  |
| N  | 0.37743  | -0.24255 | 0.88125  |
| S  | 2.75783  | -0.62248 | -0.86290 |
| C  | -0.98435 | -0.27404 | 0.34889  |
| C  | -2.05966 | 0.32753  | 0.99935  |
| C  | -1.18093 | -0.90844 | -0.88347 |
| H  | -1.93349 | 0.83683  | 1.95482  |
| H  | -0.33315 | -1.37290 | -1.39581 |
| C  | -3.32893 | 0.28750  | 0.41744  |
| C  | -2.44745 | -0.94095 | -1.45546 |
| H  | -4.16721 | 0.76319  | 0.93382  |
| H  | -2.58759 | -1.43419 | -2.42094 |
| C  | -3.52931 | -0.34359 | -0.80593 |
| H  | -4.52444 | -0.36774 | -1.25752 |
| Cl | 0.96981  | 2.51291  | -0.59349 |

#### 5.2bCl

|    |          |          |          |
|----|----------|----------|----------|
| C  | 1.72117  | -1.87670 | 0.21241  |
| C  | 2.50716  | -0.89735 | 0.76973  |
| H  | 1.71192  | -2.91158 | 0.55535  |
| H  | 3.19870  | -1.14527 | 1.58762  |
| Be | 1.28943  | 0.56902  | -0.74237 |
| C  | 3.27439  | 1.38679  | 0.98102  |
| H  | 4.35052  | 1.17154  | 0.84518  |
| H  | 3.06943  | 2.37126  | 0.53275  |
| H  | 3.07007  | 1.46450  | 2.06544  |
| N  | 2.44012  | 0.38534  | 0.34630  |
| S  | 0.73308  | -1.39288 | -1.12521 |
| C  | -1.00141 | -0.16870 | -0.21567 |
| C  | -2.19328 | -0.35753 | -0.91180 |
| C  | -0.95539 | -0.06468 | 1.16623  |
| H  | -2.19538 | -0.56135 | -1.98531 |
| H  | -0.00381 | -0.07612 | 1.70700  |
| C  | -3.38457 | -0.20157 | -0.20860 |
| C  | -2.16519 | 0.09895  | 1.84946  |
| H  | -4.33342 | -0.30076 | -0.74464 |
| H  | -2.14637 | 0.24151  | 2.93432  |
| C  | -3.37871 | 0.04860  | 1.16798  |
| H  | -4.32133 | 0.16522  | 1.70878  |
| Cl | -0.17137 | 1.71099  | -1.14837 |



## 5.5bCl

|    |          |          |          |
|----|----------|----------|----------|
| C  | 1.09168  | -1.91546 | -0.92922 |
| C  | 2.06111  | -1.67735 | 0.00148  |
| H  | 0.89347  | -2.88478 | -1.38575 |
| H  | 2.67541  | -2.51610 | 0.36032  |
| Be | 1.44300  | 0.74329  | -0.11958 |
| C  | 3.34375  | -0.30638 | 1.51416  |
| H  | 4.31610  | -0.70367 | 1.16674  |
| H  | 3.48209  | 0.76035  | 1.74894  |
| H  | 3.07227  | -0.82492 | 2.45308  |
| N  | 2.31267  | -0.44567 | 0.50124  |
| S  | 0.24721  | -0.48778 | -1.50226 |
| C  | -1.24042 | -0.34098 | -0.48240 |
| C  | -2.06514 | 0.75896  | -0.72787 |
| C  | -1.56073 | -1.26841 | 0.50588  |
| H  | -1.79828 | 1.48981  | -1.49673 |
| H  | -0.89805 | -2.11874 | 0.68910  |
| C  | -3.22431 | 0.92558  | 0.02651  |
| C  | -2.72637 | -1.09291 | 1.25266  |
| H  | -3.86906 | 1.78859  | -0.16109 |
| H  | -2.98244 | -1.82001 | 2.02846  |
| C  | -3.55937 | -0.00039 | 1.01530  |
| H  | -4.47153 | 0.13233  | 1.60336  |
| Cl | 1.23192  | 2.59718  | 0.05531  |

## 5.2cCl

|    |          |          |          |
|----|----------|----------|----------|
| C  | -1.65883 | -1.90237 | -0.88363 |
| C  | -1.99874 | -1.59099 | 0.49409  |
| H  | -1.72609 | -2.94402 | -1.21964 |
| H  | -2.46550 | -2.35492 | 1.13357  |
| Be | -0.76805 | 0.63736  | -0.07650 |
| C  | -1.92437 | -0.06300 | 2.32942  |
| H  | -2.49447 | -0.83316 | 2.87645  |
| H  | -0.94897 | 0.09987  | 2.81964  |
| H  | -2.46449 | 0.89756  | 2.33858  |
| N  | -1.67998 | -0.43487 | 0.95501  |
| S  | -1.06448 | -0.72669 | -1.84567 |
| C  | 0.96797  | 0.15517  | -0.02016 |
| C  | 1.90633  | 1.14468  | -0.36005 |
| C  | 1.46032  | -1.06734 | 0.45141  |
| H  | 1.55991  | 2.11120  | -0.74189 |
| H  | 0.76640  | -1.88767 | 0.68894  |
| C  | 3.27610  | 0.93049  | -0.18947 |

|    |          |          |          |
|----|----------|----------|----------|
| C  | 2.82600  | -1.29208 | 0.63175  |
| H  | 3.98735  | 1.72117  | -0.44872 |
| H  | 3.18072  | -2.25395 | 1.01598  |
| C  | 3.73922  | -0.28696 | 0.31023  |
| H  | 4.81225  | -0.45635 | 0.44209  |
| Cl | -1.40632 | 2.46213  | -0.13734 |

#### 5.4cCl

|    |          |          |          |
|----|----------|----------|----------|
| C  | -1.58625 | -1.91580 | -0.91049 |
| C  | -1.99568 | -1.60919 | 0.44478  |
| H  | -1.59501 | -2.95996 | -1.24410 |
| H  | -2.47738 | -2.37958 | 1.06510  |
| Be | -0.78971 | 0.63363  | -0.07602 |
| C  | -2.03852 | -0.07679 | 2.27973  |
| H  | -2.61732 | -0.85939 | 2.79938  |
| H  | -1.09435 | 0.10983  | 2.81984  |
| H  | -2.60194 | 0.87019  | 2.26039  |
| N  | -1.71741 | -0.44574 | 0.91990  |
| S  | -0.97543 | -0.72010 | -1.84245 |
| C  | 0.95631  | 0.14220  | -0.02662 |
| C  | 1.44872  | -1.06758 | 0.47391  |
| C  | 1.88795  | 1.13682  | -0.36791 |
| H  | 0.75719  | -1.89215 | 0.70352  |
| H  | 1.53819  | 2.09152  | -0.77513 |
| C  | 2.81181  | -1.27151 | 0.69162  |
| C  | 3.25551  | 0.94170  | -0.16099 |
| H  | 3.16906  | -2.22210 | 1.10043  |
| H  | 3.96368  | 1.73539  | -0.41912 |
| C  | 3.72004  | -0.26055 | 0.37303  |
| H  | 4.79163  | -0.41511 | 0.53168  |
| Cl | -1.40032 | 2.46546  | -0.13414 |

#### 5.4dCl

|    |          |          |          |
|----|----------|----------|----------|
| C  | -1.77751 | -2.01967 | -0.09622 |
| C  | -1.31030 | -1.53789 | 1.13091  |
| H  | -2.01499 | -3.08241 | -0.21594 |
| H  | -1.11419 | -2.20088 | 1.98173  |
| Be | -1.08449 | 0.57992  | -0.27188 |
| C  | -0.58612 | 0.33665  | 2.45468  |
| H  | 0.12789  | -0.30618 | 2.99698  |
| H  | -0.13843 | 1.32424  | 2.28097  |
| H  | -1.49665 | 0.47020  | 3.06343  |
| N  | -0.98006 | -0.24755 | 1.18493  |
| S  | -1.87536 | -0.98153 | -1.41295 |

|    |          |          |          |
|----|----------|----------|----------|
| C  | 0.84399  | 0.02960  | -0.04056 |
| C  | 1.62041  | 1.18695  | -0.03996 |
| C  | 1.42278  | -1.22086 | -0.14672 |
| H  | 1.16395  | 2.17618  | 0.05895  |
| H  | 0.80602  | -2.12893 | -0.08018 |
| C  | 3.00421  | 1.06782  | -0.21738 |
| C  | 2.80040  | -1.33631 | -0.33313 |
| H  | 3.62040  | 1.97195  | -0.23931 |
| H  | 3.25756  | -2.32458 | -0.43974 |
| C  | 3.59270  | -0.18621 | -0.36809 |
| H  | 4.67472  | -0.27222 | -0.50217 |
| Cl | -1.49091 | 2.44529  | -0.44504 |

#### 5.1aBr

|    |          |          |          |
|----|----------|----------|----------|
| C  | -3.39116 | 1.42808  | 0.09771  |
| C  | -3.31261 | 0.49492  | 1.07605  |
| H  | -4.14546 | 2.21693  | 0.07870  |
| H  | -4.01129 | 0.48112  | 1.92258  |
| Be | -1.50863 | -0.23179 | -0.28640 |
| C  | -2.24809 | -1.44404 | 2.08418  |
| H  | -3.17529 | -2.04405 | 2.17281  |
| H  | -1.41699 | -2.14515 | 1.89881  |
| H  | -2.06521 | -0.96281 | 3.06532  |
| N  | -2.32616 | -0.47995 | 1.01409  |
| S  | -2.21769 | 1.33306  | -1.22662 |
| C  | 1.73011  | -0.14446 | -0.14918 |
| C  | 1.48346  | 1.22239  | -0.12905 |
| C  | 2.91746  | -0.70620 | 0.30783  |
| H  | 0.53269  | 1.63358  | -0.48624 |
| H  | 3.07959  | -1.78634 | 0.28005  |
| C  | 2.47935  | 2.05726  | 0.37978  |
| C  | 3.89980  | 0.14880  | 0.80806  |
| H  | 2.30338  | 3.13574  | 0.40942  |
| H  | 4.83987  | -0.27226 | 1.17468  |
| C  | 3.68196  | 1.52606  | 0.84510  |
| H  | 4.45490  | 2.19027  | 1.24071  |
| Br | 0.39894  | -1.34246 | -0.85734 |

#### 5.2aBr

|    |         |          |          |
|----|---------|----------|----------|
| C  | 2.48976 | -1.71747 | -0.19334 |
| C  | 1.54447 | -1.75097 | 0.76558  |
| H  | 3.03624 | -2.62417 | -0.47278 |
| H  | 1.26632 | -2.65152 | 1.32258  |
| Be | 1.42137 | 0.65309  | -0.02230 |

|    |          |          |          |
|----|----------|----------|----------|
| C  | 0.70449  | -0.26342 | 2.49216  |
| H  | 1.69100  | -0.23898 | 2.98557  |
| H  | 0.22437  | 0.71860  | 2.62351  |
| H  | 0.08736  | -1.04656 | 2.96736  |
| N  | 0.89954  | -0.52636 | 1.07372  |
| S  | 2.88981  | -0.22650 | -1.04435 |
| C  | -0.86317 | -0.42181 | 0.21568  |
| C  | -1.96316 | -0.28895 | 1.04625  |
| C  | -0.90252 | -1.06148 | -1.01173 |
| H  | -1.88798 | 0.13504  | 2.04849  |
| H  | 0.01056  | -1.26455 | -1.57802 |
| C  | -3.20744 | -0.62753 | 0.51153  |
| C  | -2.15878 | -1.38650 | -1.52525 |
| H  | -4.10366 | -0.48082 | 1.12133  |
| H  | -2.22614 | -1.84402 | -2.51636 |
| C  | -3.31302 | -1.15844 | -0.77505 |
| H  | -4.29292 | -1.42164 | -1.18104 |
| Br | -0.17166 | 1.92783  | -0.20551 |

#### 5.5aBr

|    |          |          |          |
|----|----------|----------|----------|
| C  | -1.36111 | 2.62615  | -0.04815 |
| C  | -0.32146 | 2.25040  | 0.70578  |
| H  | -1.59495 | 3.68942  | -0.16561 |
| H  | 0.35195  | 2.93286  | 1.23364  |
| Be | -1.28089 | -0.03172 | -0.13762 |
| C  | -0.28967 | 0.42319  | 2.26773  |
| H  | -1.31308 | 0.72725  | 2.53604  |
| H  | -0.20602 | -0.66958 | 2.36559  |
| H  | 0.42524  | 0.92392  | 2.94359  |
| N  | -0.05473 | 0.82419  | 0.86235  |
| S  | -2.37585 | 1.46206  | -0.88525 |
| C  | 1.25524  | 0.45999  | 0.32161  |
| C  | 2.19036  | -0.27257 | 1.04966  |
| C  | 1.54036  | 0.84110  | -0.99482 |
| H  | 1.99177  | -0.59146 | 2.07285  |
| H  | 0.80318  | 1.41171  | -1.56732 |
| C  | 3.40853  | -0.61804 | 0.45991  |
| C  | 2.75429  | 0.48980  | -1.57388 |
| H  | 4.13493  | -1.19504 | 1.03863  |
| H  | 2.96222  | 0.78677  | -2.60523 |
| C  | 3.69618  | -0.24131 | -0.84782 |
| H  | 4.64956  | -0.51882 | -1.30483 |
| Br | -1.31202 | -2.06528 | -0.16885 |

#### 5.2bBr

|    |          |          |          |
|----|----------|----------|----------|
| C  | 1.86080  | -2.01680 | -0.67638 |
| C  | 2.60413  | -1.37985 | 0.28998  |
| H  | 1.90493  | -3.08999 | -0.86340 |
| H  | 3.31938  | -1.95039 | 0.89955  |
| Be | 1.29062  | 0.57526  | -0.35794 |
| C  | 3.25057  | 0.56595  | 1.57041  |
| H  | 4.33106  | 0.54297  | 1.33610  |
| H  | 2.94917  | 1.61958  | 1.67527  |
| H  | 3.09751  | 0.07463  | 2.54945  |
| N  | 2.45926  | -0.05944 | 0.52816  |
| S  | 0.82825  | -1.00736 | -1.62535 |
| C  | -0.94118 | -0.45407 | -0.24737 |
| C  | -2.14041 | -0.36337 | -0.95079 |
| C  | -0.86652 | -0.98825 | 1.02922  |
| H  | -2.16049 | -0.07204 | -2.00384 |
| H  | 0.09577  | -1.21827 | 1.49696  |
| C  | -3.32007 | -0.56725 | -0.24131 |
| C  | -2.06427 | -1.17511 | 1.72780  |
| H  | -4.27803 | -0.44791 | -0.75639 |
| H  | -2.02757 | -1.53096 | 2.76196  |
| C  | -3.28918 | -0.94625 | 1.10590  |
| H  | -4.22276 | -1.10580 | 1.65157  |
| Br | -0.26290 | 1.86745  | -0.19005 |

#### 5.5bBr

|    |          |          |          |
|----|----------|----------|----------|
| C  | -0.26374 | 2.49404  | -0.91917 |
| C  | -1.26789 | 2.51334  | 0.00399  |
| H  | 0.19284  | 3.37981  | -1.35999 |
| H  | -1.63746 | 3.48081  | 0.37427  |
| Be | -1.31857 | 0.01835  | -0.14687 |
| C  | -2.87276 | 1.51661  | 1.50306  |
| H  | -3.69300 | 2.18194  | 1.17429  |
| H  | -3.30641 | 0.52624  | 1.71122  |
| H  | -2.46429 | 1.91187  | 2.45237  |
| N  | -1.84464 | 1.38685  | 0.48539  |
| S  | 0.17429  | 0.89807  | -1.50563 |
| C  | 1.56706  | 0.35618  | -0.48463 |
| C  | 2.10815  | -0.89978 | -0.76704 |
| C  | 2.07847  | 1.13976  | 0.54672  |
| H  | 1.69245  | -1.51352 | -1.57155 |
| H  | 1.63737  | 2.11810  | 0.75582  |
| C  | 3.17414  | -1.37073 | -0.00342 |
| C  | 3.14805  | 0.65896  | 1.30238  |
| H  | 3.59690  | -2.35585 | -0.21884 |
| H  | 3.55186  | 1.27144  | 2.11353  |

|    |          |          |         |
|----|----------|----------|---------|
| C  | 3.69746  | -0.59321 | 1.03047 |
| H  | 4.53423  | -0.96668 | 1.62697 |
| Br | -1.62629 | -1.97359 | 0.02708 |

#### 5.2cBr

|    |          |          |          |
|----|----------|----------|----------|
| C  | 2.81140  | -1.63490 | -0.54316 |
| C  | 2.65977  | -1.30542 | 0.78707  |
| H  | 3.52150  | -2.39675 | -0.87419 |
| H  | 3.25312  | -1.79180 | 1.57223  |
| Be | 0.92219  | 0.12861  | -0.16740 |
| C  | 1.55355  | -0.02814 | 2.50874  |
| H  | 2.49394  | -0.09883 | 3.08423  |
| H  | 1.17363  | 1.00272  | 2.59860  |
| H  | 0.81447  | -0.70676 | 2.98427  |
| N  | 1.75148  | -0.36330 | 1.12223  |
| S  | 1.82680  | -0.81801 | -1.69454 |
| C  | -1.07470 | -0.06602 | -0.04959 |
| C  | -1.72154 | -0.49429 | -1.21327 |
| C  | -1.61462 | -0.30413 | 1.21452  |
| H  | -1.31921 | -0.25129 | -2.19886 |
| H  | -1.15215 | 0.10977  | 2.11290  |
| C  | -2.85981 | -1.28534 | -1.08927 |
| C  | -2.75771 | -1.09799 | 1.31760  |
| H  | -3.34658 | -1.66418 | -1.99259 |
| H  | -3.17057 | -1.31446 | 2.30726  |
| C  | -3.37823 | -1.59456 | 0.17194  |
| H  | -4.28004 | -2.20657 | 0.25804  |
| Br | -0.13928 | 2.03713  | -0.24436 |

#### 5.3cBr

|    |          |          |          |
|----|----------|----------|----------|
| C  | 0.77190  | 2.61585  | -0.88900 |
| C  | 1.07117  | 2.43815  | 0.52604  |
| H  | 0.61331  | 3.63368  | -1.26611 |
| H  | 1.26055  | 3.31535  | 1.16239  |
| Be | 0.56361  | -0.06219 | -0.04511 |
| C  | 1.29070  | 0.98604  | 2.40814  |
| H  | 1.56524  | 1.89817  | 2.96465  |
| H  | 0.37052  | 0.54823  | 2.83197  |
| H  | 2.08669  | 0.22769  | 2.48798  |
| N  | 1.05695  | 1.24935  | 1.00711  |
| S  | 0.59238  | 1.31071  | -1.84541 |
| C  | -1.21754 | -0.18425 | -0.01258 |
| C  | -1.79672 | -1.43165 | -0.30488 |
| C  | -2.08413 | 0.85121  | 0.36363  |

|    |          |          |          |
|----|----------|----------|----------|
| H  | -1.15633 | -2.26720 | -0.60861 |
| H  | -1.68676 | 1.85613  | 0.57076  |
| C  | -3.17344 | -1.63858 | -0.19086 |
| C  | -3.46135 | 0.65757  | 0.48447  |
| H  | -3.59663 | -2.62360 | -0.41234 |
| H  | -4.10977 | 1.48514  | 0.79012  |
| C  | -4.00953 | -0.59504 | 0.20689  |
| H  | -5.08831 | -0.75583 | 0.29595  |
| Br | 1.89326  | -1.68519 | -0.04888 |

#### 5.4cBr

|    |          |          |          |
|----|----------|----------|----------|
| C  | 0.47517  | 2.60135  | -0.97518 |
| C  | 0.97238  | 2.51244  | 0.37996  |
| H  | 0.11367  | 3.56535  | -1.35062 |
| H  | 1.16073  | 3.42642  | 0.96237  |
| Be | 0.63032  | -0.01713 | -0.04930 |
| C  | 1.56412  | 1.16860  | 2.26783  |
| H  | 1.81669  | 2.12842  | 2.74966  |
| H  | 0.76075  | 0.66716  | 2.83432  |
| H  | 2.43813  | 0.49694  | 2.26843  |
| N  | 1.12046  | 1.34378  | 0.90301  |
| S  | 0.31657  | 1.22429  | -1.84483 |
| C  | -1.18407 | -0.17127 | -0.01739 |
| C  | -1.71201 | -1.43493 | -0.32997 |
| C  | -2.06618 | 0.80779  | 0.45148  |
| H  | -1.05278 | -2.22026 | -0.71482 |
| H  | -1.70390 | 1.82765  | 0.64930  |
| C  | -3.06308 | -1.71918 | -0.11885 |
| C  | -3.41586 | 0.53274  | 0.67287  |
| H  | -3.45177 | -2.71567 | -0.35098 |
| H  | -4.08180 | 1.31239  | 1.05595  |
| C  | -3.91666 | -0.73845 | 0.38689  |
| H  | -4.97624 | -0.95949 | 0.54730  |
| Br | 1.93212  | -1.65172 | -0.04467 |

#### 5.4dBr

|    |          |          |          |
|----|----------|----------|----------|
| C  | 0.32073  | 2.84106  | -0.16341 |
| C  | 0.03573  | 2.26338  | 1.07764  |
| H  | 0.07910  | 3.89322  | -0.35008 |
| H  | -0.48470 | 2.81062  | 1.87229  |
| Be | 0.86157  | 0.20366  | -0.17361 |
| C  | 0.13828  | 0.33256  | 2.51088  |
| H  | -0.84199 | 0.57270  | 2.95606  |
| H  | 0.24142  | -0.75530 | 2.40136  |

|    |          |          |          |
|----|----------|----------|----------|
| H  | 0.94209  | 0.69228  | 3.17553  |
| N  | 0.31001  | 0.96551  | 1.21455  |
| S  | 0.95511  | 1.89074  | -1.39502 |
| C  | -1.12048 | -0.16669 | -0.03447 |
| C  | -1.31879 | -1.54155 | 0.07700  |
| C  | -2.17773 | 0.68943  | -0.28214 |
| H  | -0.48877 | -2.22054 | 0.29285  |
| H  | -2.02340 | 1.77767  | -0.29820 |
| C  | -2.60260 | -2.05715 | -0.13732 |
| C  | -3.45394 | 0.17269  | -0.50614 |
| H  | -2.76339 | -3.13736 | -0.07040 |
| H  | -4.28586 | 0.84856  | -0.72553 |
| C  | -3.66560 | -1.20609 | -0.43286 |
| H  | -4.66697 | -1.61570 | -0.59328 |
| Br | 2.18459  | -1.39020 | -0.19437 |

5.1al

|    |          |          |          |
|----|----------|----------|----------|
| C  | -3.48049 | 1.68099  | -0.19170 |
| C  | -3.50805 | 0.91012  | 0.92204  |
| H  | -4.19514 | 2.48364  | -0.38421 |
| H  | -4.26031 | 1.05370  | 1.70863  |
| Be | -1.64807 | -0.08129 | -0.17849 |
| C  | -2.60087 | -0.87617 | 2.29441  |
| H  | -3.55873 | -1.42056 | 2.41063  |
| H  | -1.79266 | -1.62664 | 2.28289  |
| H  | -2.45948 | -0.25035 | 3.19764  |
| N  | -2.56451 | -0.09413 | 1.08268  |
| S  | -2.22992 | 1.33946  | -1.39631 |
| C  | 1.79990  | 0.08622  | 0.01008  |
| C  | 1.48776  | 1.42258  | -0.21643 |
| C  | 3.02460  | -0.31558 | 0.53853  |
| H  | 0.51451  | 1.72091  | -0.62267 |
| H  | 3.25071  | -1.37044 | 0.71422  |
| C  | 2.44563  | 2.38644  | 0.10351  |
| C  | 3.96813  | 0.66445  | 0.84855  |
| H  | 2.21451  | 3.44144  | -0.06641 |
| H  | 4.93341  | 0.36590  | 1.26665  |
| C  | 3.68048  | 2.01186  | 0.63189  |
| H  | 4.42348  | 2.77476  | 0.87904  |
| I  | 0.38207  | -1.42349 | -0.48218 |

5.2al

|   |         |          |          |
|---|---------|----------|----------|
| C | 2.73077 | -1.74273 | -0.29880 |
| C | 1.75873 | -1.94175 | 0.60896  |



|    |          |          |          |
|----|----------|----------|----------|
| H  | 3.36408  | -2.57216 | -0.63022 |
| H  | 1.53839  | -2.90734 | 1.07487  |
| Be | 1.47143  | 0.51577  | 0.03659  |
| C  | 0.84333  | -0.65926 | 2.44935  |
| H  | 1.84390  | -0.55784 | 2.90228  |
| H  | 0.26383  | 0.25003  | 2.67308  |
| H  | 0.34128  | -1.54014 | 2.88639  |
| N  | 1.00091  | -0.80122 | 1.00547  |
| S  | 3.03270  | -0.15335 | -1.00190 |
| C  | -0.72612 | -0.81972 | 0.21146  |
| C  | -0.72755 | -1.33731 | -1.07744 |
| C  | -1.81549 | -0.92917 | 1.06470  |
| H  | 0.18748  | -1.37389 | -1.67517 |
| H  | -1.76417 | -0.62664 | 2.11162  |
| C  | -1.95151 | -1.73089 | -1.61470 |
| C  | -3.02987 | -1.32912 | 0.50683  |
| H  | -1.99154 | -2.07899 | -2.65070 |
| H  | -3.92160 | -1.35522 | 1.13988  |
| C  | -3.10923 | -1.70740 | -0.83450 |
| H  | -4.06528 | -2.02183 | -1.26050 |
| I  | -0.39717 | 1.77296  | -0.07209 |

#### 5.5al

|    |          |          |          |
|----|----------|----------|----------|
| C  | 0.18023  | 3.19051  | -0.11719 |
| C  | 0.98678  | 2.43166  | 0.63327  |
| H  | 0.41347  | 4.24888  | -0.27344 |
| H  | 1.90281  | 2.77959  | 1.12083  |
| Be | -0.87341 | 0.74955  | -0.10263 |
| C  | 0.29447  | 0.82783  | 2.27887  |
| H  | -0.47689 | 1.56382  | 2.55192  |
| H  | -0.11046 | -0.18350 | 2.43274  |
| H  | 1.18514  | 0.98322  | 2.91221  |
| N  | 0.62723  | 1.03324  | 0.85002  |
| S  | -1.25979 | 2.54264  | -0.88735 |
| C  | 1.64173  | 0.12417  | 0.31312  |
| C  | 2.15130  | -0.94433 | 1.04809  |
| C  | 2.06637  | 0.32898  | -1.00481 |
| H  | 1.83090  | -1.13484 | 2.07213  |
| H  | 1.66188  | 1.16447  | -1.58319 |
| C  | 3.08536  | -1.80241 | 0.46394  |
| C  | 2.99531  | -0.53230 | -1.57793 |
| H  | 3.47741  | -2.63950 | 1.04779  |
| H  | 3.31470  | -0.36543 | -2.61003 |
| C  | 3.51100  | -1.60244 | -0.84522 |
| H  | 4.23962  | -2.28043 | -1.29726 |

|   |          |          |          |
|---|----------|----------|----------|
| I | -1.88027 | -1.26754 | -0.09186 |
|---|----------|----------|----------|

5.2bl

|    |          |          |          |
|----|----------|----------|----------|
| C  | 2.12465  | -2.11324 | -0.69576 |
| C  | 2.82694  | -1.41895 | 0.26178  |
| H  | 2.26276  | -3.17561 | -0.89749 |
| H  | 3.60312  | -1.92906 | 0.85032  |
| Be | 1.35140  | 0.43775  | -0.35597 |
| C  | 3.32886  | 0.56755  | 1.54722  |
| H  | 4.38740  | 0.70648  | 1.25901  |
| H  | 2.88980  | 1.56296  | 1.71652  |
| H  | 3.29916  | 0.01933  | 2.50700  |
| N  | 2.57332  | -0.11887 | 0.51606  |
| S  | 0.99154  | -1.18846 | -1.61821 |
| C  | -0.80557 | -0.88159 | -0.26315 |
| C  | -0.67441 | -1.39212 | 1.01884  |
| C  | -2.00965 | -0.92080 | -0.96318 |
| H  | 0.30860  | -1.53469 | 1.47858  |
| H  | -2.05972 | -0.66503 | -2.02441 |
| C  | -1.84626 | -1.64895 | 1.73626  |
| C  | -3.16476 | -1.19343 | -0.23716 |
| H  | -1.77551 | -1.97428 | 2.77844  |
| H  | -4.13361 | -1.16704 | -0.74454 |
| C  | -3.09076 | -1.52406 | 1.12123  |
| H  | -4.00453 | -1.73586 | 1.68270  |
| I  | -0.45651 | 1.71968  | -0.11434 |

5.5bl

|    |          |          |          |
|----|----------|----------|----------|
| C  | 0.94155  | 2.67075  | -0.89345 |
| C  | -0.01356 | 3.02845  | 0.01184  |
| H  | 1.68512  | 3.34773  | -1.31336 |
| H  | -0.03397 | 4.06092  | 0.38987  |
| Be | -0.91037 | 0.70515  | -0.17672 |
| C  | -1.89482 | 2.63642  | 1.46916  |
| H  | -2.43765 | 3.53816  | 1.12928  |
| H  | -2.63966 | 1.85031  | 1.66795  |
| H  | -1.39208 | 2.87252  | 2.42591  |
| N  | -0.95402 | 2.16562  | 0.46744  |
| S  | 0.81190  | 1.02746  | -1.49954 |
| C  | 1.92211  | 0.02742  | -0.47805 |
| C  | 2.05225  | -1.32033 | -0.81824 |
| C  | 2.60582  | 0.56065  | 0.61156  |
| H  | 1.50569  | -1.73194 | -1.67174 |
| H  | 2.48686  | 1.61828  | 0.86242  |

|   |          |          |          |
|---|----------|----------|----------|
| C | 2.87726  | -2.14026 | -0.05107 |
| C | 3.43225  | -0.26900 | 1.36945  |
| H | 2.97776  | -3.19758 | -0.31086 |
| H | 3.96966  | 0.14566  | 2.22693  |
| C | 3.56931  | -1.61734 | 1.04189  |
| H | 4.21549  | -2.26400 | 1.64168  |
| I | -1.99926 | -1.24754 | 0.01511  |

5.2cl

|    |          |          |          |
|----|----------|----------|----------|
| C  | 3.03295  | -1.66005 | -0.67322 |
| C  | 2.86050  | -1.46742 | 0.67953  |
| H  | 3.88340  | -2.21492 | -1.07664 |
| H  | 3.57538  | -1.86452 | 1.41214  |
| Be | 0.85993  | -0.31841 | -0.13026 |
| C  | 1.57735  | -0.57550 | 2.52155  |
| H  | 2.51478  | -0.69417 | 3.09332  |
| H  | 1.18333  | 0.43566  | 2.72066  |
| H  | 0.84421  | -1.30858 | 2.91750  |
| N  | 1.78751  | -0.76463 | 1.10877  |
| S  | 1.85502  | -0.99364 | -1.74062 |
| C  | -1.07973 | -0.38904 | -0.03597 |
| C  | -1.62771 | -0.75735 | 1.20064  |
| C  | -1.72198 | -0.75608 | -1.22958 |
| H  | -1.17537 | -0.41459 | 2.13446  |
| H  | -1.32409 | -0.42934 | -2.19395 |
| C  | -2.74965 | -1.58334 | 1.23722  |
| C  | -2.84122 | -1.57967 | -1.17908 |
| H  | -3.15790 | -1.89440 | 2.20323  |
| H  | -3.31770 | -1.89629 | -2.11123 |
| C  | -3.35542 | -1.99973 | 0.05138  |
| H  | -4.24158 | -2.63962 | 0.08408  |
| I  | -0.16958 | 1.88781  | -0.07564 |

5.3cl

|    |          |         |          |
|----|----------|---------|----------|
| C  | 1.37190  | 2.61635 | -0.86899 |
| C  | 1.02718  | 2.62567 | 0.54663  |
| H  | 2.00255  | 3.42231 | -1.26288 |
| H  | 1.31875  | 3.47684 | 1.17913  |
| Be | -0.00564 | 0.27367 | -0.04182 |
| C  | 0.07984  | 1.50242 | 2.43095  |
| H  | 0.39285  | 2.39141 | 3.00416  |
| H  | -1.01131 | 1.35974 | 2.50508  |
| H  | 0.56165  | 0.59812 | 2.84057  |
| N  | 0.42839  | 1.60109 | 1.03241  |

|   |          |          |          |
|---|----------|----------|----------|
| S | 0.90557  | 1.36147  | -1.79609 |
| C | -1.69409 | -0.09522 | -0.09579 |
| C | -2.18319 | -1.40986 | -0.20673 |
| C | -2.66226 | 0.92517  | -0.01363 |
| H | -1.47196 | -2.24159 | -0.27141 |
| H | -2.34368 | 1.97427  | 0.06956  |
| C | -3.55045 | -1.69294 | -0.23151 |
| C | -4.03313 | 0.65981  | -0.03793 |
| H | -3.89351 | -2.72919 | -0.31761 |
| H | -4.75553 | 1.48037  | 0.02596  |
| C | -4.48109 | -0.65697 | -0.14658 |
| H | -5.55371 | -0.87442 | -0.16641 |
| I | 1.77435  | -1.31680 | 0.10968  |

5.4cl

|    |          |          |          |
|----|----------|----------|----------|
| C  | 0.74781  | 2.73430  | -1.05546 |
| C  | 0.21825  | 2.87322  | 0.27601  |
| H  | 1.41194  | 3.50664  | -1.45777 |
| H  | 0.31475  | 3.82689  | 0.81525  |
| Be | -0.25631 | 0.36475  | -0.04598 |
| C  | -0.80823 | 1.89289  | 2.20071  |
| H  | -0.72201 | 2.90498  | 2.63152  |
| H  | -1.86185 | 1.56885  | 2.20235  |
| H  | -0.23979 | 1.17782  | 2.81952  |
| N  | -0.30347 | 1.83594  | 0.84552  |
| S  | 0.48585  | 1.32159  | -1.84855 |
| C  | 1.43659  | -0.35216 | -0.02462 |
| C  | 1.56810  | -1.70457 | -0.37899 |
| C  | 2.55046  | 0.29936  | 0.51577  |
| H  | 0.72382  | -2.23716 | -0.82883 |
| H  | 2.50633  | 1.37521  | 0.73808  |
| C  | 2.75549  | -2.39520 | -0.12802 |
| C  | 3.73723  | -0.38426 | 0.77801  |
| H  | 2.83396  | -3.45447 | -0.39129 |
| H  | 4.58888  | 0.14080  | 1.22153  |
| C  | 3.83897  | -1.73904 | 0.45622  |
| H  | 4.77115  | -2.27907 | 0.64741  |
| I  | -2.17395 | -0.93083 | -0.00743 |

5.4dl

|   |         |         |          |
|---|---------|---------|----------|
| C | 0.83354 | 2.94338 | -0.18077 |
| C | 0.99358 | 2.31498 | 1.05662  |
| H | 1.33371 | 3.89706 | -0.38261 |
| H | 1.66173 | 2.70802 | 1.83147  |

|    |          |          |          |
|----|----------|----------|----------|
| Be | -0.38527 | 0.55114  | -0.14827 |
| C  | 0.40651  | 0.50250  | 2.52620  |
| H  | -0.25857 | 1.07784  | 3.19236  |
| H  | 0.01290  | -0.51952 | 2.44437  |
| H  | 1.42396  | 0.47965  | 2.95153  |
| N  | 0.38508  | 1.13682  | 1.21853  |
| S  | -0.06522 | 2.19078  | -1.38607 |
| C  | 1.42090  | -0.35352 | -0.02164 |
| C  | 1.26390  | -1.73008 | 0.13285  |
| C  | 2.65335  | 0.19204  | -0.33338 |
| H  | 0.29930  | -2.16967 | 0.40204  |
| H  | 2.78631  | 1.28197  | -0.37833 |
| C  | 2.36079  | -2.56551 | -0.10900 |
| C  | 3.74209  | -0.64274 | -0.58439 |
| H  | 2.23892  | -3.64828 | -0.01034 |
| H  | 4.71039  | -0.21070 | -0.85355 |
| C  | 3.59349  | -2.02698 | -0.47191 |
| H  | 4.44720  | -2.68584 | -0.65433 |
| I  | -2.30897 | -0.70245 | -0.12056 |

#### 6.1aF

|   |          |          |          |
|---|----------|----------|----------|
| C | 1.03926  | 0.05972  | 1.43381  |
| C | 0.76746  | -0.22245 | 2.92150  |
| C | 2.10872  | -0.69411 | 3.43458  |
| C | 2.99812  | -0.60550 | 2.44368  |
| N | 2.37009  | -0.16612 | 1.25996  |
| C | 0.36468  | 1.03780  | 3.71869  |
| C | -0.33616 | -1.28356 | 3.07062  |
| C | 3.10846  | -0.05963 | 0.04163  |
| C | 3.34413  | 1.21518  | -0.52260 |
| C | 4.11061  | 1.27463  | -1.68812 |
| C | 4.65116  | 0.12510  | -2.26026 |
| C | 4.41761  | -1.11397 | -1.68225 |
| C | 3.62758  | -1.23578 | -0.53287 |
| C | 2.80766  | 2.47973  | 0.13592  |
| C | 3.37096  | -2.62096 | 0.04842  |
| C | 2.78928  | -3.58627 | -0.99154 |
| C | 4.65022  | -3.20666 | 0.66331  |
| C | 2.81687  | 3.71353  | -0.76712 |
| C | 3.54796  | 2.79067  | 1.44556  |
| H | 2.27062  | 4.53193  | -0.26919 |
| H | 2.31438  | 3.52869  | -1.73085 |
| H | 3.84275  | 4.07039  | -0.97112 |
| H | 1.75502  | 2.27935  | 0.38706  |
| H | 3.48154  | 1.96550  | 2.17277  |

|    |          |          |          |
|----|----------|----------|----------|
| H  | 3.11177  | 3.68835  | 1.91853  |
| H  | 4.61714  | 2.99255  | 1.25223  |
| H  | 4.30461  | 2.24010  | -2.15882 |
| H  | 5.258295 | 0.201178 | -3.16681 |
| H  | 4.844108 | -2.0098  | -2.14229 |
| H  | 2.620611 | -2.52651 | 0.848891 |
| H  | 3.477759 | -3.74338 | -1.83993 |
| H  | 1.834455 | -3.21089 | -1.3921  |
| H  | 2.608022 | -4.57219 | -0.52976 |
| H  | 4.440792 | -4.17783 | 1.144884 |
| H  | 5.084096 | -2.53677 | 1.424074 |
| H  | 5.420331 | -3.37176 | -0.11139 |
| H  | -0.05368 | -2.21468 | 2.556518 |
| H  | -1.28401 | -0.92581 | 2.633988 |
| H  | -0.5109  | -1.51245 | 4.137362 |
| H  | -0.60647 | 1.425432 | 3.375147 |
| H  | 1.12646  | 1.829702 | 3.620164 |
| H  | 0.282543 | 0.782848 | 4.790591 |
| H  | 4.071301 | -0.79539 | 2.432854 |
| H  | 2.312205 | -0.97881 | 4.467393 |
| Be | -0.15611 | 0.414063 | 0.312372 |
| C  | -0.75546 | -0.10271 | -1.16118 |
| C  | -0.23131 | 0.086455 | -2.58563 |
| C  | -1.44518 | -0.21942 | -3.43963 |
| C  | -2.4282  | -0.65157 | -2.64534 |
| N  | -2.01195 | -0.62235 | -1.29634 |
| C  | 0.328925 | 1.497184 | -2.80754 |
| C  | 0.874024 | -0.94804 | -2.89368 |
| C  | -2.75467 | -1.26103 | -0.24855 |
| C  | -3.94779 | -0.67914 | 0.217951 |
| C  | -4.63229 | -1.31131 | 1.262811 |
| C  | -4.15762 | -2.48833 | 1.8202   |
| C  | -3.00024 | -3.07618 | 1.315618 |
| C  | -2.28191 | -2.49325 | 0.270903 |
| C  | -4.54877 | 0.570065 | -0.4033  |
| C  | -1.07177 | -3.20844 | -0.32231 |
| C  | -0.50748 | -4.32164 | 0.563672 |
| C  | -1.3997  | -3.79481 | -1.70467 |
| C  | -4.80555 | 1.677275 | 0.624889 |
| C  | -5.82843 | 0.225739 | -1.17897 |
| H  | -5.12629 | 2.602517 | 0.115261 |
| H  | -3.89195 | 1.902732 | 1.195905 |
| H  | -5.60249 | 1.393916 | 1.335681 |
| H  | -3.82583 | 0.960284 | -1.1323  |
| H  | -5.6439  | -0.54639 | -1.9461  |
| H  | -6.22768 | 1.123072 | -1.68367 |

|   |          |          |          |
|---|----------|----------|----------|
| H | -6.61297 | -0.15838 | -0.5028  |
| H | -5.55599 | -0.8674  | 1.64508  |
| H | -4.69763 | -2.96464 | 2.643564 |
| H | -2.65798 | -4.01629 | 1.751134 |
| H | -0.27625 | -2.45304 | -0.44411 |
| H | -1.20487 | -5.17398 | 0.645994 |
| H | -0.27333 | -3.97135 | 1.581702 |
| H | 0.423714 | -4.70819 | 0.119538 |
| H | -0.50516 | -4.28066 | -2.13379 |
| H | -1.73593 | -3.02897 | -2.42006 |
| H | -2.19386 | -4.55861 | -1.62077 |
| H | 0.503878 | -1.97581 | -2.7483  |
| H | 1.742193 | -0.78703 | -2.23626 |
| H | 1.206848 | -0.84688 | -3.94253 |
| H | 0.716626 | 1.601064 | -3.83696 |
| H | 1.157718 | 1.675985 | -2.10411 |
| H | -0.43197 | 2.27373  | -2.63767 |
| H | -3.42663 | -1.02019 | -2.88445 |
| H | -1.46818 | -0.16225 | -4.52844 |
| C | -0.30541 | 3.357724 | 1.225265 |
| C | -0.35546 | 4.711597 | 0.909289 |
| C | -1.12143 | 5.182697 | -0.15864 |
| C | -1.86877 | 4.257954 | -0.8975  |
| C | -1.83859 | 2.90377  | -0.59839 |
| C | -1.00156 | 2.419499 | 0.430431 |
| H | 0.318266 | 3.02406  | 2.051509 |
| H | 0.227194 | 5.410965 | 1.517909 |
| H | -1.15099 | 6.247897 | -0.4006  |
| H | -2.49021 | 4.597849 | -1.73234 |
| H | -2.41671 | 2.205062 | -1.2027  |
| F | -1.55393 | 1.22166  | 1.181963 |

#### 6.2aF

|   |          |          |          |
|---|----------|----------|----------|
| C | 1.11420  | -0.10052 | 1.42032  |
| C | 1.01800  | 0.02445  | 2.93995  |
| C | 2.31368  | -0.54835 | 3.44559  |
| C | 3.00833  | -0.98357 | 2.40010  |
| N | 2.27645  | -0.69754 | 1.19965  |
| C | 0.80985  | 1.47613  | 3.40493  |
| C | -0.14876 | -0.87475 | 3.41669  |
| C | 2.84776  | -1.15209 | -0.04274 |
| C | 3.97279  | -0.47929 | -0.55819 |
| C | 4.57900  | -1.01265 | -1.70146 |
| C | 4.10467  | -2.17607 | -2.29074 |
| C | 3.00091  | -2.82832 | -1.75261 |

|    |          |          |          |
|----|----------|----------|----------|
| C  | 2.34299  | -2.33283 | -0.62475 |
| C  | 4.57160  | 0.76603  | 0.08640  |
| C  | 1.13555  | -3.06443 | -0.04673 |
| C  | 0.42865  | -3.95982 | -1.06840 |
| C  | 1.53291  | -3.89075 | 1.18609  |
| C  | 4.97443  | 1.82820  | -0.94722 |
| C  | 5.80033  | 0.41904  | 0.94303  |
| H  | 5.15230  | 2.79144  | -0.44073 |
| H  | 4.19472  | 1.98673  | -1.70905 |
| H  | 5.90797  | 1.55289  | -1.46921 |
| H  | 3.80721  | 1.21277  | 0.74214  |
| H  | 5.56285  | -0.27068 | 1.76677  |
| H  | 6.22195  | 1.33680  | 1.38850  |
| H  | 6.58543  | -0.05084 | 0.32391  |
| H  | 5.44813  | -0.51027 | -2.13291 |
| H  | 4.597969 | -2.58108 | -3.17874 |
| H  | 2.639352 | -3.73671 | -2.23657 |
| H  | 0.409724 | -2.2969  | 0.274506 |
| H  | 1.058916 | -4.81188 | -1.37735 |
| H  | 0.131352 | -3.40234 | -1.97321 |
| H  | -0.48387 | -4.3871  | -0.6255  |
| H  | 0.649018 | -4.39357 | 1.613956 |
| H  | 1.974951 | -3.26661 | 1.979009 |
| H  | 2.270567 | -4.66503 | 0.909169 |
| H  | 0.030084 | -1.92896 | 3.141106 |
| H  | -1.0837  | -0.52013 | 2.956877 |
| H  | -0.22693 | -0.8191  | 4.516619 |
| H  | -0.16012 | 1.841684 | 3.039319 |
| H  | 1.601527 | 2.136622 | 3.015778 |
| H  | 0.827052 | 1.509838 | 4.508735 |
| H  | 3.955061 | -1.51595 | 2.325495 |
| H  | 2.593708 | -0.62745 | 4.496499 |
| Be | -0.25178 | 0.838114 | 0.467356 |
| C  | -0.99749 | 0.19704  | -1.14764 |
| C  | -0.5138  | 0.280308 | -2.58866 |
| C  | -1.60808 | -0.38154 | -3.38502 |
| C  | -2.6141  | -0.64346 | -2.55421 |
| N  | -2.23493 | -0.26378 | -1.22708 |
| C  | -0.50548 | 1.78711  | -2.9736  |
| C  | 0.868409 | -0.32358 | -2.82686 |
| C  | -3.25587 | -0.32267 | -0.20424 |
| C  | -3.95087 | 0.85986  | 0.111682 |
| C  | -5.03591 | 0.750814 | 0.980187 |
| C  | -5.41183 | -0.47691 | 1.520282 |
| C  | -4.68832 | -1.61974 | 1.213175 |
| C  | -3.58926 | -1.56311 | 0.347615 |



|   |          |          |          |
|---|----------|----------|----------|
| C | -3.5439  | 2.207984 | -0.46286 |
| C | -2.79682 | -2.82483 | 0.05171  |
| C | -2.294   | -3.46887 | 1.348346 |
| C | -3.60503 | -3.81845 | -0.79133 |
| C | -3.82469 | 3.372268 | 0.488872 |
| C | -4.20358 | 2.449822 | -1.82806 |
| H | -3.32987 | 4.284282 | 0.113674 |
| H | -3.42677 | 3.155136 | 1.493459 |
| H | -4.9041  | 3.59306  | 0.574258 |
| H | -2.45256 | 2.191712 | -0.60015 |
| H | -3.96071 | 1.653808 | -2.5527  |
| H | -3.86251 | 3.409148 | -2.25619 |
| H | -5.30345 | 2.491218 | -1.72791 |
| H | -5.59753 | 1.646433 | 1.254524 |
| H | -6.26848 | -0.53589 | 2.197827 |
| H | -4.97922 | -2.57668 | 1.655922 |
| H | -1.90925 | -2.53653 | -0.53315 |
| H | -3.12894 | -3.78549 | 1.996972 |
| H | -1.67267 | -2.76012 | 1.918348 |
| H | -1.69307 | -4.36898 | 1.13229  |
| H | -2.99678 | -4.70652 | -1.04029 |
| H | -3.94209 | -3.36227 | -1.7377  |
| H | -4.50202 | -4.16401 | -0.24728 |
| H | 0.866667 | -1.40772 | -2.64568 |
| H | 1.61579  | 0.1344   | -2.16042 |
| H | 1.179011 | -0.15196 | -3.87211 |
| H | -0.28032 | 1.878045 | -4.05027 |
| H | 0.253643 | 2.331259 | -2.39479 |
| H | -1.48442 | 2.2563   | -2.78437 |
| H | -3.60942 | -1.05584 | -2.71874 |
| H | -1.59189 | -0.53696 | -4.46428 |
| C | 1.687051 | 2.731474 | -0.46658 |
| C | 2.197056 | 4.021963 | -0.63991 |
| C | 1.505896 | 5.113975 | -0.11412 |
| C | 0.314855 | 4.891534 | 0.579757 |
| C | -0.16993 | 3.590945 | 0.740769 |
| C | 0.49152  | 2.463744 | 0.218826 |
| H | 2.240634 | 1.892604 | -0.90595 |
| H | 3.133136 | 4.179806 | -1.1868  |
| H | 1.893715 | 6.129779 | -0.24299 |
| H | -0.23621 | 5.74021  | 1.00072  |
| H | -1.1005  | 3.439712 | 1.299925 |
| F | -1.45277 | 0.890906 | 1.442334 |

6.3aF

|    |          |          |          |
|----|----------|----------|----------|
| C  | 1.44537  | 0.10644  | 1.45820  |
| C  | 1.48182  | 0.45892  | 2.94033  |
| C  | 2.94887  | 0.53710  | 3.25954  |
| C  | 3.63072  | 0.19608  | 2.17059  |
| N  | 2.70712  | -0.04999 | 1.10198  |
| C  | 0.72694  | 1.76207  | 3.25499  |
| C  | 0.87624  | -0.72347 | 3.74371  |
| C  | 3.23827  | -0.47756 | -0.16794 |
| C  | 4.00932  | 0.43589  | -0.91138 |
| C  | 4.58361  | -0.01907 | -2.10269 |
| C  | 4.40528  | -1.32708 | -2.52922 |
| C  | 3.65281  | -2.21380 | -1.76560 |
| C  | 3.05570  | -1.81847 | -0.56616 |
| C  | 4.26573  | 1.87254  | -0.46886 |
| C  | 2.26498  | -2.81199 | 0.28177  |
| C  | 1.83658  | -4.06606 | -0.48392 |
| C  | 3.05700  | -3.22337 | 1.53300  |
| C  | 3.96504  | 2.89769  | -1.57241 |
| C  | 5.71404  | 2.04839  | 0.01427  |
| H  | 4.02347  | 3.91869  | -1.15755 |
| H  | 2.96157  | 2.76341  | -2.00533 |
| H  | 4.69922  | 2.83511  | -2.39424 |
| H  | 3.59818  | 2.09955  | 0.37726  |
| H  | 5.97517  | 1.34702  | 0.82300  |
| H  | 5.87111  | 3.07386  | 0.39121  |
| H  | 6.42564  | 1.87815  | -0.81292 |
| H  | 5.18207  | 0.66635  | -2.70845 |
| H  | 4.858768 | -1.66478 | -3.46514 |
| H  | 3.523689 | -3.23615 | -2.12291 |
| H  | 1.343032 | -2.3028  | 0.611406 |
| H  | 2.70296  | -4.68525 | -0.77615 |
| H  | 1.258039 | -3.82235 | -1.38999 |
| H  | 1.19828  | -4.69299 | 0.159367 |
| H  | 2.447039 | -3.89226 | 2.164688 |
| H  | 3.351687 | -2.36066 | 2.151657 |
| H  | 3.97657  | -3.76447 | 1.246717 |
| H  | 1.37642  | -1.67464 | 3.492475 |
| H  | -0.19366 | -0.80623 | 3.508204 |
| H  | 1.016462 | -0.53357 | 4.821779 |
| H  | -0.33791 | 1.64389  | 3.005214 |
| H  | 1.129387 | 2.611018 | 2.678564 |
| H  | 0.823948 | 1.986108 | 4.331523 |
| H  | 4.695198 | 0.058894 | 1.989814 |
| H  | 3.361786 | 0.770649 | 4.241256 |
| Be | -0.2309  | 0.081775 | 0.667506 |
| C  | -0.86555 | -0.00494 | -0.92648 |

|   |          |          |          |
|---|----------|----------|----------|
| C | -0.27983 | 0.039957 | -2.35814 |
| C | -1.4842  | 0.305492 | -3.2312  |
| C | -2.57215 | 0.122429 | -2.48823 |
| N | -2.23349 | -0.1311  | -1.13956 |
| C | 0.88318  | 0.974087 | -2.66258 |
| C | 0.180078 | -1.40934 | -2.65393 |
| C | -3.25058 | -0.63871 | -0.25836 |
| C | -4.44479 | 0.100448 | -0.07997 |
| C | -5.46667 | -0.45322 | 0.699812 |
| C | -5.33006 | -1.69523 | 1.300339 |
| C | -4.15379 | -2.40971 | 1.115122 |
| C | -3.10584 | -1.91203 | 0.339249 |
| C | -4.71046 | 1.472254 | -0.69905 |
| C | -1.89442 | -2.8085  | 0.124174 |
| C | -1.3776  | -3.4179  | 1.431616 |
| C | -2.20673 | -3.88575 | -0.92216 |
| C | -5.14278 | 2.509033 | 0.350703 |
| C | -5.78077 | 1.396959 | -1.79966 |
| H | -5.12506 | 3.521998 | -0.08827 |
| H | -4.48163 | 2.503879 | 1.232043 |
| H | -6.1704  | 2.321615 | 0.70818  |
| H | -3.77872 | 1.84188  | -1.15245 |
| H | -5.52711 | 0.668358 | -2.58748 |
| H | -5.91415 | 2.383345 | -2.27843 |
| H | -6.75455 | 1.091452 | -1.37757 |
| H | -6.39529 | 0.107224 | 0.840835 |
| H | -6.13966 | -2.10859 | 1.908641 |
| H | -4.05267 | -3.39422 | 1.579252 |
| H | -1.08034 | -2.18951 | -0.27103 |
| H | -2.08469 | -4.14705 | 1.865435 |
| H | -1.19306 | -2.61964 | 2.167242 |
| H | -0.43246 | -3.95813 | 1.25231  |
| H | -1.30594 | -4.48601 | -1.1456  |
| H | -2.56019 | -3.43336 | -1.86533 |
| H | -2.99526 | -4.57351 | -0.56572 |
| H | -0.63177 | -2.13386 | -2.4828  |
| H | 1.032183 | -1.66854 | -2.00958 |
| H | 0.501561 | -1.49864 | -3.70693 |
| H | 1.233859 | 0.791621 | -3.69406 |
| H | 1.729761 | 0.778485 | -1.98869 |
| H | 0.588582 | 2.030372 | -2.58087 |
| H | -3.61703 | 0.096487 | -2.78966 |
| H | -1.44766 | 0.496868 | -4.3039  |
| C | -1.702   | 2.468601 | 0.532098 |
| C | -1.79997 | 3.836643 | 0.788549 |
| C | -0.70054 | 4.667515 | 0.56385  |

|   |          |          |          |
|---|----------|----------|----------|
| C | 0.494257 | 4.112202 | 0.105772 |
| C | 0.56933  | 2.740022 | -0.14351 |
| C | -0.52871 | 1.891554 | 0.042167 |
| H | -2.54247 | 1.811938 | 0.764336 |
| H | -2.73306 | 4.257438 | 1.176895 |
| H | -0.77165 | 5.741898 | 0.759878 |
| H | 1.373798 | 4.746384 | -0.04967 |
| H | 1.526417 | 2.322571 | -0.45908 |
| F | -1.20417 | -0.26616 | 1.780383 |

6.4aF

|   |          |          |          |
|---|----------|----------|----------|
| C | 1.12051  | 0.66931  | 1.27351  |
| C | 1.13669  | 0.95138  | 2.85647  |
| C | 2.63291  | 1.05324  | 3.12409  |
| C | 3.30907  | 0.47344  | 2.12589  |
| N | 2.49828  | 0.11201  | 1.05659  |
| C | 0.38042  | 2.21735  | 3.28452  |
| C | 0.59352  | -0.20517 | 3.71890  |
| C | 2.92344  | -0.82601 | 0.07485  |
| C | 3.88946  | -0.46510 | -0.90019 |
| C | 4.23071  | -1.38526 | -1.89868 |
| C | 3.69016  | -2.66246 | -1.92808 |
| C | 2.82667  | -3.05129 | -0.91081 |
| C | 2.44666  | -2.16362 | 0.09958  |
| C | 4.66174  | 0.84596  | -0.86746 |
| C | 1.64510  | -2.68869 | 1.27605  |
| C | 0.65112  | -3.79358 | 0.91941  |
| C | 2.60252  | -3.14372 | 2.38660  |
| C | 4.43482  | 1.71263  | -2.11020 |
| C | 6.15759  | 0.58876  | -0.63376 |
| H | 4.99538  | 2.66055  | -2.02362 |
| H | 3.36937  | 1.96470  | -2.23238 |
| H | 4.77768  | 1.20497  | -3.02972 |
| H | 4.31005  | 1.41697  | -0.00362 |
| H | 6.31930  | -0.02476 | 0.26944  |
| H | 6.69387  | 1.54491  | -0.49946 |
| H | 6.62237  | 0.06045  | -1.48507 |
| H | 4.95671  | -1.09496 | -2.66421 |
| H | 3.96938  | -3.3657  | -2.71791 |
| H | 2.446994 | -4.0758  | -0.89587 |
| H | 1.056983 | -1.86463 | 1.690745 |
| H | 1.149487 | -4.754   | 0.695355 |
| H | 0.036308 | -3.51156 | 0.047842 |
| H | -0.03496 | -3.96166 | 1.765047 |
| H | 2.033143 | -3.50113 | 3.262909 |

|    |          |          |          |
|----|----------|----------|----------|
| H  | 3.248597 | -2.31362 | 2.718508 |
| H  | 3.250466 | -3.96699 | 2.034216 |
| H  | 1.106915 | -1.15192 | 3.49805  |
| H  | -0.48662 | -0.35801 | 3.56624  |
| H  | 0.775044 | 0.019606 | 4.785993 |
| H  | -0.69694 | 2.142178 | 3.049921 |
| H  | 0.774389 | 3.131545 | 2.814666 |
| H  | 0.47041  | 2.337295 | 4.379096 |
| H  | 4.380452 | 0.257986 | 2.074597 |
| H  | 3.063067 | 1.418461 | 4.05834  |
| Be | -0.27826 | -0.31503 | 0.678871 |
| C  | -1.00989 | -0.14422 | -1.02403 |
| C  | -0.36472 | -0.07509 | -2.39084 |
| C  | -1.51299 | 0.213852 | -3.31779 |
| C  | -2.63778 | 0.182833 | -2.60566 |
| N  | -2.31038 | -0.05573 | -1.23317 |
| C  | 0.800042 | 0.911164 | -2.50635 |
| C  | 0.147793 | -1.51394 | -2.68024 |
| C  | -3.38111 | -0.26804 | -0.28263 |
| C  | -4.13277 | 0.832414 | 0.155193 |
| C  | -5.21255 | 0.580777 | 1.010075 |
| C  | -5.52687 | -0.71128 | 1.403867 |
| C  | -4.76807 | -1.78445 | 0.946179 |
| C  | -3.68286 | -1.59273 | 0.091593 |
| C  | -3.85096 | 2.261501 | -0.28412 |
| C  | -2.89851 | -2.78161 | -0.44215 |
| C  | -2.8747  | -3.97051 | 0.518792 |
| C  | -3.4216  | -3.20559 | -1.82237 |
| C  | -3.73083 | 3.215047 | 0.912017 |
| C  | -4.92318 | 2.758578 | -1.26443 |
| H  | -3.44225 | 4.224628 | 0.573483 |
| H  | -2.9748  | 2.868643 | 1.636017 |
| H  | -4.69082 | 3.314957 | 1.446913 |
| H  | -2.88834 | 2.273384 | -0.81911 |
| H  | -5.00684 | 2.101814 | -2.1466  |
| H  | -4.68061 | 3.77544  | -1.61957 |
| H  | -5.91511 | 2.795421 | -0.7805  |
| H  | -5.82068 | 1.414335 | 1.371039 |
| H  | -6.37123 | -0.88821 | 2.075953 |
| H  | -5.02802 | -2.79414 | 1.269234 |
| H  | -1.85396 | -2.45961 | -0.55382 |
| H  | -3.86132 | -4.46011 | 0.6011   |
| H  | -2.54715 | -3.65167 | 1.521346 |
| H  | -2.16452 | -4.73105 | 0.152372 |
| H  | -2.82377 | -4.0451  | -2.21925 |
| H  | -3.37286 | -2.3829  | -2.55619 |

|   |          |          |          |
|---|----------|----------|----------|
| H | -4.47348 | -3.53682 | -1.75595 |
| H | -0.66409 | -2.2577  | -2.61141 |
| H | 0.944277 | -1.78491 | -1.97207 |
| H | 0.56639  | -1.54962 | -3.69993 |
| H | 1.240331 | 0.840728 | -3.51611 |
| H | 1.576987 | 0.653151 | -1.77249 |
| H | 0.481228 | 1.949311 | -2.32559 |
| H | -3.6852  | 0.283215 | -2.88714 |
| H | -1.42343 | 0.357937 | -4.39471 |
| C | 2.067442 | 2.838357 | 0.211482 |
| C | 1.8928   | 4.051273 | -0.45226 |
| C | 0.613941 | 4.504364 | -0.77262 |
| C | -0.48305 | 3.735806 | -0.38758 |
| C | -0.29099 | 2.520674 | 0.268221 |
| C | 0.986874 | 2.020546 | 0.561216 |
| H | 3.071707 | 2.529781 | 0.489215 |
| H | 2.76943  | 4.652281 | -0.71392 |
| H | 0.472036 | 5.453599 | -1.29701 |
| H | -1.49593 | 4.08559  | -0.60456 |
| H | -1.17081 | 1.948543 | 0.581171 |
| F | -1.15429 | -1.17455 | 1.496888 |

#### 6.1aCl

|   |          |           |           |
|---|----------|-----------|-----------|
| C | 1.256415 | -0.072178 | 1.440513  |
| C | 1.158473 | -0.395046 | 2.952817  |
| C | 2.565083 | -0.808059 | 3.321054  |
| C | 3.339306 | -0.683896 | 2.244509  |
| N | 2.577664 | -0.258230 | 1.139064  |
| C | 0.791650 | 0.809453  | 3.847135  |
| C | 0.169353 | -1.552378 | 3.180129  |
| C | 3.212789 | -0.176115 | -0.135147 |
| C | 3.441277 | 1.085198  | -0.727178 |
| C | 4.122225 | 1.107904  | -1.946513 |
| C | 4.584335 | -0.064442 | -2.541814 |
| C | 4.363685 | -1.290816 | -1.931092 |
| C | 3.664161 | -1.374099 | -0.721958 |
| C | 2.979922 | 2.369911  | -0.046968 |
| C | 3.410410 | -2.741291 | -0.096520 |
| C | 2.525960 | -3.625105 | -0.984266 |
| C | 4.728008 | -3.446539 | 0.250822  |
| C | 3.004887 | 3.599911  | -0.955985 |
| C | 3.785551 | 2.664751  | 1.227948  |
| H | 2.521344 | 4.445378  | -0.439821 |
| H | 2.455591 | 3.438501  | -1.897948 |
| H | 4.038170 | 3.903740  | -1.203849 |

|    |           |           |           |
|----|-----------|-----------|-----------|
| H  | 1.931709  | 2.211332  | 0.257491  |
| H  | 3.714853  | 1.853911  | 1.969755  |
| H  | 3.402990  | 3.584933  | 1.703695  |
| H  | 4.852944  | 2.822429  | 0.989455  |
| H  | 4.308759  | 2.061093  | -2.444500 |
| H  | 5.120999  | -0.015127 | -3.493564 |
| H  | 4.725379  | -2.204910 | -2.411066 |
| H  | 2.858753  | -2.596723 | 0.843354  |
| H  | 2.973774  | -3.788394 | -1.980784 |
| H  | 1.534869  | -3.167400 | -1.126592 |
| H  | 2.381951  | -4.613306 | -0.512552 |
| H  | 4.530303  | -4.395162 | 0.779738  |
| H  | 5.362450  | -2.819083 | 0.900181  |
| H  | 5.310562  | -3.684578 | -0.656865 |
| H  | 0.508578  | -2.447575 | 2.635020  |
| H  | -0.842157 | -1.291934 | 2.825691  |
| H  | 0.107638  | -1.803096 | 4.254828  |
| H  | -0.228917 | 1.168596  | 3.655390  |
| H  | 1.503412  | 1.638581  | 3.694861  |
| H  | 0.858526  | 0.504878  | 4.907126  |
| H  | 4.409481  | -0.846254 | 2.112329  |
| H  | 2.880520  | -1.094424 | 4.324743  |
| Be | -0.039723 | 0.264863  | 0.403018  |
| C  | -0.760992 | -0.130353 | -1.073768 |
| C  | -0.197565 | 0.078678  | -2.487573 |
| C  | -1.388423 | -0.160000 | -3.384378 |
| C  | -2.412422 | -0.556808 | -2.629708 |
| N  | -2.045170 | -0.562817 | -1.263817 |
| C  | 0.396754  | 1.481604  | -2.660687 |
| C  | 0.872998  | -0.981339 | -2.814409 |
| C  | -2.933632 | -1.134678 | -0.294858 |
| C  | -4.165395 | -0.501085 | -0.033309 |
| C  | -5.017559 | -1.074607 | 0.915781  |
| C  | -4.667046 | -2.237226 | 1.585214  |
| C  | -3.465371 | -2.872926 | 1.283976  |
| C  | -2.585436 | -2.357348 | 0.329295  |
| C  | -4.629735 | 0.751746  | -0.764580 |
| C  | -1.344551 | -3.143804 | -0.082006 |
| C  | -0.960659 | -4.264372 | 0.887182  |
| C  | -1.519695 | -3.738646 | -1.488777 |
| C  | -5.021131 | 1.892414  | 0.183162  |
| C  | -5.792336 | 0.423040  | -1.713655 |
| H  | -5.252342 | 2.803014  | -0.396965 |
| H  | -4.205350 | 2.130134  | 0.882935  |
| H  | -5.919428 | 1.639376  | 0.774002  |
| H  | -3.796601 | 1.116864  | -1.382768 |

|    |           |           |           |
|----|-----------|-----------|-----------|
| H  | -5.531238 | -0.379479 | -2.424426 |
| H  | -6.081053 | 1.315901  | -2.295871 |
| H  | -6.679937 | 0.086446  | -1.148997 |
| H  | -5.974396 | -0.593827 | 1.138221  |
| H  | -5.339656 | -2.664754 | 2.334264  |
| H  | -3.224685 | -3.807168 | 1.794102  |
| H  | -0.499705 | -2.434132 | -0.111903 |
| H  | -1.676617 | -5.104783 | 0.846918  |
| H  | -0.903833 | -3.914681 | 1.930009  |
| H  | 0.030098  | -4.664666 | 0.611237  |
| H  | -0.603824 | -4.276600 | -1.792291 |
| H  | -1.722140 | -2.969995 | -2.250705 |
| H  | -2.356722 | -4.459972 | -1.499940 |
| H  | 0.462059  | -1.998325 | -2.709434 |
| H  | 1.733596  | -0.878082 | -2.140551 |
| H  | 1.226558  | -0.855984 | -3.853699 |
| H  | 0.837244  | 1.592945  | -3.667791 |
| H  | 1.189036  | 1.640224  | -1.915171 |
| H  | -0.361376 | 2.266208  | -2.519068 |
| H  | -3.413599 | -0.885081 | -2.907872 |
| H  | -1.368469 | -0.089964 | -4.472362 |
| C  | -0.038896 | 3.275126  | 1.444880  |
| C  | 0.143070  | 4.594845  | 1.048704  |
| C  | -0.523087 | 5.119196  | -0.061668 |
| C  | -1.409601 | 4.289850  | -0.757002 |
| C  | -1.611353 | 2.971583  | -0.373276 |
| C  | -0.877200 | 2.416681  | 0.698193  |
| H  | 0.501874  | 2.894480  | 2.309518  |
| H  | 0.825525  | 5.225570  | 1.627853  |
| H  | -0.372720 | 6.158029  | -0.365612 |
| H  | -1.959832 | 4.677190  | -1.620497 |
| H  | -2.303792 | 2.342220  | -0.934401 |
| Cl | -1.836182 | 1.095232  | 1.701826  |

#### 6.2aCl

|   |          |           |           |
|---|----------|-----------|-----------|
| C | 1.330265 | -0.068468 | 1.452949  |
| C | 1.470241 | 0.102513  | 2.973798  |
| C | 2.890981 | -0.287627 | 3.267387  |
| C | 3.447508 | -0.708249 | 2.139662  |
| N | 2.502473 | -0.566808 | 1.068842  |
| C | 1.161110 | 1.525674  | 3.469347  |
| C | 0.566899 | -0.944429 | 3.679720  |
| C | 2.964546 | -1.034296 | -0.217400 |
| C | 4.006131 | -0.330688 | -0.853307 |
| C | 4.527591 | -0.862819 | -2.037596 |



|    |           |           |           |
|----|-----------|-----------|-----------|
| C  | 4.058966  | -2.060947 | -2.554588 |
| C  | 3.053501  | -2.754523 | -1.890595 |
| C  | 2.484407  | -2.264232 | -0.712166 |
| C  | 4.619727  | 0.954082  | -0.309161 |
| C  | 1.412513  | -3.066897 | 0.014360  |
| C  | 0.700352  | -4.067379 | -0.898249 |
| C  | 2.009442  | -3.797737 | 1.226772  |
| C  | 4.642837  | 2.073879  | -1.360165 |
| C  | 6.041885  | 0.710931  | 0.219316  |
| H  | 4.920047  | 3.029300  | -0.883271 |
| H  | 3.661668  | 2.209590  | -1.842630 |
| H  | 5.386005  | 1.871774  | -2.151285 |
| H  | 4.007174  | 1.304031  | 0.535335  |
| H  | 6.069162  | -0.059343 | 1.006683  |
| H  | 6.454221  | 1.642297  | 0.644628  |
| H  | 6.714973  | 0.382164  | -0.592203 |
| H  | 5.328842  | -0.331430 | -2.557964 |
| H  | 4.484256  | -2.465464 | -3.477294 |
| H  | 2.703546  | -3.697609 | -2.311531 |
| H  | 0.652810  | -2.356403 | 0.383074  |
| H  | 1.375850  | -4.874260 | -1.231191 |
| H  | 0.274492  | -3.579038 | -1.791767 |
| H  | -0.123129 | -4.551265 | -0.352912 |
| H  | 1.221116  | -4.343145 | 1.773934  |
| H  | 2.488371  | -3.104994 | 1.937281  |
| H  | 2.769788  | -4.529147 | 0.899090  |
| H  | 0.765766  | -1.961542 | 3.299199  |
| H  | -0.491402 | -0.697734 | 3.515671  |
| H  | 0.784529  | -0.932724 | 4.761797  |
| H  | 0.111222  | 1.780002  | 3.266093  |
| H  | 1.803062  | 2.266762  | 2.967048  |
| H  | 1.343782  | 1.573265  | 4.557548  |
| H  | 4.424433  | -1.137125 | 1.924318  |
| H  | 3.342929  | -0.278843 | 4.259442  |
| Be | -0.231468 | 0.743818  | 0.625774  |
| C  | -0.969384 | 0.206507  | -1.038051 |
| C  | -0.409456 | 0.491707  | -2.432615 |
| C  | -1.351135 | -0.221987 | -3.363110 |
| C  | -2.377740 | -0.662362 | -2.641834 |
| N  | -2.147290 | -0.359718 | -1.261304 |
| C  | -0.589767 | 2.017736  | -2.697873 |
| C  | 1.055572  | 0.127322  | -2.638226 |
| C  | -3.279040 | -0.582142 | -0.382661 |
| C  | -4.179355 | 0.484198  | -0.194120 |
| C  | -5.363237 | 0.212435  | 0.490227  |
| C  | -5.633033 | -1.058002 | 0.991136  |

|    |           |           |           |
|----|-----------|-----------|-----------|
| C  | -4.704346 | -2.075614 | 0.830532  |
| C  | -3.508805 | -1.858397 | 0.137165  |
| C  | -3.870142 | 1.895275  | -0.670172 |
| C  | -2.476829 | -2.967392 | 0.059810  |
| C  | -1.889313 | -3.203338 | 1.458359  |
| C  | -3.048535 | -4.249614 | -0.554750 |
| C  | -4.347648 | 2.968618  | 0.312147  |
| C  | -4.429907 | 2.150471  | -2.076071 |
| H  | -3.918701 | 3.945325  | 0.028940  |
| H  | -4.014973 | 2.730256  | 1.335784  |
| H  | -5.446898 | 3.079186  | 0.311310  |
| H  | -2.774763 | 1.994044  | -0.705938 |
| H  | -4.037159 | 1.430193  | -2.813829 |
| H  | -4.164527 | 3.165911  | -2.420217 |
| H  | -5.531846 | 2.066637  | -2.076100 |
| H  | -6.085525 | 1.014930  | 0.656433  |
| H  | -6.566567 | -1.246535 | 1.528780  |
| H  | -4.904725 | -3.059891 | 1.263147  |
| H  | -1.655818 | -2.624510 | -0.589963 |
| H  | -2.672328 | -3.529097 | 2.165549  |
| H  | -1.452260 | -2.269962 | 1.849841  |
| H  | -1.112539 | -3.986775 | 1.439135  |
| H  | -2.264774 | -5.020044 | -0.657754 |
| H  | -3.471262 | -4.058613 | -1.556479 |
| H  | -3.849579 | -4.678459 | 0.072079  |
| H  | 1.227078  | -0.951201 | -2.515441 |
| H  | 1.685408  | 0.668341  | -1.917627 |
| H  | 1.371677  | 0.412769  | -3.656552 |
| H  | -0.330540 | 2.219556  | -3.751392 |
| H  | 0.067852  | 2.607120  | -2.043617 |
| H  | -1.629009 | 2.340318  | -2.531739 |
| H  | -3.302766 | -1.168861 | -2.916097 |
| H  | -1.235335 | -0.279568 | -4.445804 |
| C  | 1.515175  | 2.886862  | 0.017036  |
| C  | 1.849450  | 4.228812  | -0.188543 |
| C  | 0.904919  | 5.221320  | 0.071589  |
| C  | -0.353195 | 4.848228  | 0.549854  |
| C  | -0.657564 | 3.500385  | 0.753984  |
| C  | 0.257439  | 2.467213  | 0.477675  |
| H  | 2.270016  | 2.127382  | -0.204786 |
| H  | 2.845659  | 4.501003  | -0.554891 |
| H  | 1.147718  | 6.276657  | -0.089180 |
| H  | -1.101752 | 5.617471  | 0.770554  |
| H  | -1.643374 | 3.237755  | 1.152849  |
| Cl | -1.804733 | 0.594574  | 1.993448  |

6.3aCl

|    |           |           |           |
|----|-----------|-----------|-----------|
| C  | -1.583398 | -0.293221 | 1.447654  |
| C  | -1.729555 | -0.908705 | 2.843673  |
| C  | -3.204216 | -1.166366 | 2.974045  |
| C  | -3.814697 | -0.630515 | 1.923622  |
| N  | -2.825549 | -0.125954 | 1.019034  |
| C  | -0.855515 | -2.144461 | 3.094343  |
| C  | -1.424116 | 0.187757  | 3.910102  |
| C  | -3.285435 | 0.538861  | -0.173347 |
| C  | -4.032520 | -0.198649 | -1.113179 |
| C  | -4.520767 | 0.487522  | -2.229536 |
| C  | -4.292363 | 1.846750  | -2.394384 |
| C  | -3.580645 | 2.556629  | -1.432749 |
| C  | -3.063825 | 1.925550  | -0.299075 |
| C  | -4.375352 | -1.678424 | -0.950673 |
| C  | -2.354113 | 2.726074  | 0.787802  |
| C  | -1.739011 | 4.037008  | 0.296148  |
| C  | -3.321900 | 2.994701  | 1.950950  |
| C  | -3.998955 | -2.535337 | -2.167714 |
| C  | -5.873764 | -1.850158 | -0.650549 |
| H  | -4.246673 | -3.591790 | -1.966021 |
| H  | -2.925459 | -2.481314 | -2.400095 |
| H  | -4.557363 | -2.232689 | -3.070295 |
| H  | -3.811379 | -2.077485 | -0.093350 |
| H  | -6.203659 | -1.246712 | 0.211300  |
| H  | -6.103616 | -2.907947 | -0.434931 |
| H  | -6.483354 | -1.541581 | -1.518098 |
| H  | -5.095068 | -0.055494 | -2.984868 |
| H  | -4.680334 | 2.362730  | -3.276869 |
| H  | -3.417349 | 3.626028  | -1.576383 |
| H  | -1.518548 | 2.120349  | 1.171833  |
| H  | -2.505060 | 4.769961  | -0.012429 |
| H  | -1.048682 | 3.871984  | -0.548123 |
| H  | -1.162486 | 4.495524  | 1.116153  |
| H  | -2.800618 | 3.514472  | 2.773467  |
| H  | -3.749332 | 2.063097  | 2.359137  |
| H  | -4.160201 | 3.631779  | 1.616446  |
| H  | -1.995094 | 1.110193  | 3.711626  |
| H  | -0.352104 | 0.424349  | 3.905883  |
| H  | -1.719913 | -0.195989 | 4.901441  |
| H  | 0.207922  | -1.876784 | 3.007270  |
| H  | -1.075763 | -2.948998 | 2.375197  |
| H  | -1.045263 | -2.520238 | 4.114813  |
| H  | -4.867332 | -0.506766 | 1.678742  |
| H  | -3.677200 | -1.615506 | 3.847573  |
| Be | 0.122897  | -0.055653 | 0.697991  |
| C  | 0.829784  | 0.061278  | -0.875671 |

|   |           |           |           |
|---|-----------|-----------|-----------|
| C | 0.203694  | 0.142662  | -2.303873 |
| C | 1.372628  | -0.080010 | -3.231829 |
| C | 2.485154  | -0.005704 | -2.509381 |
| N | 2.204512  | 0.160499  | -1.137659 |
| C | -0.963303 | -0.757684 | -2.676007 |
| C | -0.259515 | 1.608735  | -2.472966 |
| C | 3.303548  | 0.570155  | -0.300214 |
| C | 4.412938  | -0.290433 | -0.138347 |
| C | 5.491748  | 0.148904  | 0.639004  |
| C | 5.495029  | 1.401600  | 1.231008  |
| C | 4.421371  | 2.258257  | 1.018570  |
| C | 3.327610  | 1.875180  | 0.242993  |
| C | 4.544706  | -1.659402 | -0.801798 |
| C | 2.247879  | 2.895794  | -0.079488 |
| C | 2.005474  | 3.922147  | 1.028845  |
| C | 2.600561  | 3.599308  | -1.399157 |
| C | 4.959501  | -2.758432 | 0.189913  |
| C | 5.564824  | -1.623099 | -1.952015 |
| H | 4.809723  | -3.754401 | -0.262172 |
| H | 4.381708  | -2.712621 | 1.126648  |
| H | 6.027332  | -2.676594 | 0.458379  |
| H | 3.567775  | -1.941291 | -1.222631 |
| H | 5.319618  | -0.865105 | -2.713575 |
| H | 5.614698  | -2.605294 | -2.454840 |
| H | 6.573635  | -1.386276 | -1.569878 |
| H | 6.352069  | -0.510995 | 0.781628  |
| H | 6.342078  | 1.720399  | 1.845402  |
| H | 4.443189  | 3.254339  | 1.465203  |
| H | 1.302634  | 2.351965  | -0.213696 |
| H | 2.859603  | 4.609723  | 1.160823  |
| H | 1.802477  | 3.418083  | 1.988058  |
| H | 1.132980  | 4.546069  | 0.770075  |
| H | 1.803180  | 4.304602  | -1.696565 |
| H | 2.742638  | 2.875099  | -2.219787 |
| H | 3.539888  | 4.171494  | -1.291288 |
| H | 0.562061  | 2.315633  | -2.293551 |
| H | -1.076281 | 1.829174  | -1.771105 |
| H | -0.631189 | 1.772154  | -3.500185 |
| H | -1.325056 | -0.478812 | -3.681704 |
| H | -1.801373 | -0.621349 | -1.981916 |
| H | -0.668857 | -1.816961 | -2.701714 |
| H | 3.523048  | -0.010424 | -2.836191 |
| H | 1.294544  | -0.199998 | -4.312374 |
| C | 1.615565  | -2.450572 | 0.503395  |
| C | 1.673893  | -3.830339 | 0.702741  |
| C | 0.583836  | -4.632059 | 0.361951  |

|    |           |           |           |
|----|-----------|-----------|-----------|
| C  | -0.570762 | -4.036136 | -0.144086 |
| C  | -0.615111 | -2.652124 | -0.320777 |
| C  | 0.483568  | -1.829569 | -0.030832 |
| H  | 2.451846  | -1.824463 | 0.819978  |
| H  | 2.570564  | -4.283539 | 1.135746  |
| H  | 0.628315  | -5.715394 | 0.510167  |
| H  | -1.447227 | -4.646244 | -0.387064 |
| H  | -1.553329 | -2.210155 | -0.657716 |
| Cl | 1.336498  | 0.484704  | 2.225891  |

#### 6.4aCl

|   |          |           |           |
|---|----------|-----------|-----------|
| C | 1.529745 | -0.368851 | 1.531039  |
| C | 1.691800 | -0.539390 | 3.046023  |
| C | 3.174072 | -0.652550 | 3.247110  |
| C | 3.766144 | -0.550083 | 2.063741  |
| N | 2.762527 | -0.374245 | 1.058713  |
| C | 1.193727 | 0.722899  | 3.792523  |
| C | 1.010264 | -1.826388 | 3.559238  |
| C | 3.261610 | -0.199203 | -0.284206 |
| C | 3.755086 | 1.067741  | -0.637023 |
| C | 4.359742 | 1.188511  | -1.892425 |
| C | 4.481819 | 0.091843  | -2.735895 |
| C | 4.003863 | -1.155743 | -2.344506 |
| C | 3.385412 | -1.334595 | -1.106262 |
| C | 3.719428 | 2.261743  | 0.310998  |
| C | 2.861861 | -2.699694 | -0.670492 |
| C | 2.460463 | -3.601933 | -1.841127 |
| C | 3.871588 | -3.434097 | 0.225209  |
| C | 3.191036 | 3.546714  | -0.337324 |
| C | 5.114139 | 2.505859  | 0.909215  |
| H | 3.141499 | 4.348183  | 0.419478  |
| H | 2.179727 | 3.415440  | -0.749965 |
| H | 3.855260 | 3.899150  | -1.145594 |
| H | 3.039501 | 2.019053  | 1.143541  |
| H | 5.511774 | 1.611568  | 1.416092  |
| H | 5.077139 | 3.325202  | 1.647825  |
| H | 5.832420 | 2.791683  | 0.120497  |
| H | 4.746268 | 2.159107  | -2.213492 |
| H | 4.957237 | 0.208394  | -3.713628 |
| H | 4.102362 | -2.001868 | -3.027241 |
| H | 1.949782 | -2.523398 | -0.074943 |
| H | 3.341737 | -3.959983 | -2.401870 |
| H | 1.783470 | -3.089401 | -2.542829 |
| H | 1.937640 | -4.493982 | -1.456507 |
| H | 3.466954 | -4.416180 | 0.525708  |

|    |           |           |           |
|----|-----------|-----------|-----------|
| H  | 4.102904  | -2.876816 | 1.146735  |
| H  | 4.817840  | -3.605469 | -0.317755 |
| H  | 1.378909  | -2.710158 | 3.010097  |
| H  | -0.079566 | -1.754523 | 3.441279  |
| H  | 1.251199  | -1.959959 | 4.627809  |
| H  | 0.110762  | 0.849090  | 3.657650  |
| H  | 1.712447  | 1.625588  | 3.424633  |
| H  | 1.416956  | 0.612778  | 4.867383  |
| H  | 4.810583  | -0.583223 | 1.758262  |
| H  | 3.655989  | -0.792853 | 4.214877  |
| Be | -0.190417 | -0.090898 | 0.731242  |
| C  | -0.926604 | 0.563419  | -0.796209 |
| C  | -0.263753 | 0.580893  | -2.243566 |
| C  | -1.484144 | 0.638672  | -3.153180 |
| C  | -2.538646 | 0.173853  | -2.471015 |
| N  | -2.276827 | -0.023890 | -1.123744 |
| C  | 0.717142  | 1.729872  | -2.480236 |
| C  | 0.464120  | -0.732461 | -2.559964 |
| C  | -3.145452 | -0.862685 | -0.357355 |
| C  | -4.410811 | -0.378541 | 0.044409  |
| C  | -5.271928 | -1.220317 | 0.755857  |
| C  | -4.914386 | -2.522958 | 1.070886  |
| C  | -3.674756 | -3.001441 | 0.664339  |
| C  | -2.785515 | -2.195775 | -0.047237 |
| C  | -4.849212 | 1.052752  | -0.210366 |
| C  | -1.463496 | -2.792128 | -0.499340 |
| C  | -0.798729 | -3.688335 | 0.550870  |
| C  | -1.649601 | -3.539700 | -1.825656 |
| C  | -4.696724 | 1.890952  | 1.064810  |
| C  | -6.261208 | 1.161416  | -0.796055 |
| H  | -4.922472 | 2.953923  | 0.863665  |
| H  | -3.667226 | 1.824564  | 1.453350  |
| H  | -5.384219 | 1.534289  | 1.853824  |
| H  | -4.167033 | 1.472724  | -0.955079 |
| H  | -6.365872 | 0.545613  | -1.706646 |
| H  | -6.479412 | 2.210438  | -1.064844 |
| H  | -7.038699 | 0.840497  | -0.080341 |
| H  | -6.243069 | -0.838789 | 1.084485  |
| H  | -5.598074 | -3.165267 | 1.633743  |
| H  | -3.397719 | -4.031314 | 0.905491  |
| H  | -0.771424 | -1.959173 | -0.690733 |
| H  | -1.346404 | -4.634495 | 0.703181  |
| H  | -0.732684 | -3.172857 | 1.523582  |
| H  | 0.222117  | -3.959974 | 0.226617  |
| H  | -0.687054 | -3.930489 | -2.202831 |
| H  | -2.079363 | -2.876548 | -2.595386 |

|    |           |           |           |
|----|-----------|-----------|-----------|
| H  | -2.339303 | -4.392747 | -1.692167 |
| H  | -0.240417 | -1.570639 | -2.636193 |
| H  | 1.198861  | -0.955370 | -1.776184 |
| H  | 1.002446  | -0.664837 | -3.523217 |
| H  | 1.115820  | 1.670258  | -3.509069 |
| H  | 1.574127  | 1.655801  | -1.793660 |
| H  | 0.252128  | 2.719835  | -2.353467 |
| H  | -3.539139 | -0.058474 | -2.847800 |
| H  | -1.451759 | 0.866319  | -4.219659 |
| C  | -2.063342 | 2.912661  | -0.811545 |
| C  | -2.127536 | 4.236460  | -0.384120 |
| C  | -1.207452 | 4.732478  | 0.541027  |
| C  | -0.208835 | 3.886223  | 1.012993  |
| C  | -0.154304 | 2.565248  | 0.568989  |
| C  | -1.084341 | 2.029530  | -0.332382 |
| H  | -2.768227 | 2.565891  | -1.565767 |
| H  | -2.906472 | 4.893137  | -0.783898 |
| H  | -1.266935 | 5.769626  | 0.883554  |
| H  | 0.533840  | 4.249298  | 1.730201  |
| H  | 0.669675  | 1.940037  | 0.936216  |
| Cl | -1.535812 | -0.229729 | 2.182383  |

#### 6.1aBr

|   |          |           |           |
|---|----------|-----------|-----------|
| C | 1.357049 | -0.040028 | 1.402963  |
| C | 1.266411 | -0.283541 | 2.932449  |
| C | 2.678231 | -0.658001 | 3.321048  |
| C | 3.452018 | -0.570730 | 2.241684  |
| N | 2.686302 | -0.210443 | 1.116178  |
| C | 0.902925 | 0.974813  | 3.752481  |
| C | 0.297854 | -1.439086 | 3.241067  |
| C | 3.337749 | -0.168601 | -0.150929 |
| C | 3.557250 | 1.072103  | -0.787677 |
| C | 4.258813 | 1.058031  | -1.995459 |
| C | 4.751797 | -0.128764 | -2.534646 |
| C | 4.543165 | -1.333353 | -1.877853 |
| C | 3.823110 | -1.380641 | -0.678976 |
| C | 3.071358 | 2.375960  | -0.162292 |
| C | 3.581225 | -2.725898 | -0.002833 |
| C | 2.710987 | -3.651057 | -0.861957 |
| C | 4.903505 | -3.403299 | 0.379577  |
| C | 3.096613 | 3.570219  | -1.117660 |
| C | 3.860140 | 2.726291  | 1.109266  |
| H | 2.606336 | 4.432822  | -0.637984 |
| H | 2.554851 | 3.369802  | -2.056592 |
| H | 4.130298 | 3.869581  | -1.368868 |

|    |           |           |           |
|----|-----------|-----------|-----------|
| H  | 2.021096  | 2.217931  | 0.136962  |
| H  | 3.791285  | 1.941151  | 1.878216  |
| H  | 3.462643  | 3.658157  | 1.548963  |
| H  | 4.927955  | 2.887944  | 0.875564  |
| H  | 4.439825  | 1.993740  | -2.527412 |
| H  | 5.304755  | -0.108098 | -3.478103 |
| H  | 4.930930  | -2.258924 | -2.313565 |
| H  | 3.021758  | -2.551996 | 0.927515  |
| H  | 3.160737  | -3.837588 | -1.853498 |
| H  | 1.713258  | -3.212749 | -1.016802 |
| H  | 2.581627  | -4.626352 | -0.360116 |
| H  | 4.710865  | -4.335392 | 0.938871  |
| H  | 5.524961  | -2.747339 | 1.013180  |
| H  | 5.497395  | -3.666315 | -0.513765 |
| H  | 0.652785  | -2.363411 | 2.757518  |
| H  | -0.719128 | -1.223977 | 2.873478  |
| H  | 0.243651  | -1.616997 | 4.330554  |
| H  | -0.126402 | 1.309587  | 3.565396  |
| H  | 1.599248  | 1.799607  | 3.523527  |
| H  | 0.999742  | 0.745424  | 4.828875  |
| H  | 4.525254  | -0.719375 | 2.118749  |
| H  | 2.994733  | -0.890848 | 4.338064  |
| Be | 0.058850  | 0.206548  | 0.335808  |
| C  | -0.636849 | -0.240843 | -1.140714 |
| C  | -0.027836 | -0.060152 | -2.541544 |
| C  | -1.176694 | -0.357883 | -3.472804 |
| C  | -2.216184 | -0.761000 | -2.744425 |
| N  | -1.904264 | -0.711212 | -1.365334 |
| C  | 0.539514  | 1.350133  | -2.741377 |
| C  | 1.074558  | -1.105995 | -2.801264 |
| C  | -2.823086 | -1.278339 | -0.422249 |
| C  | -4.096388 | -0.692825 | -0.262753 |
| C  | -4.974616 | -1.260087 | 0.666191  |
| C  | -4.610659 | -2.369312 | 1.415033  |
| C  | -3.367671 | -2.962370 | 1.210994  |
| C  | -2.460890 | -2.454904 | 0.277511  |
| C  | -4.576846 | 0.499456  | -1.082265 |
| C  | -1.175905 | -3.211658 | -0.040298 |
| C  | -0.784342 | -4.254314 | 1.008661  |
| C  | -1.280855 | -3.888990 | -1.416385 |
| C  | -5.087809 | 1.663105  | -0.223248 |
| C  | -5.661259 | 0.063235  | -2.079823 |
| H  | -5.345152 | 2.521354  | -0.868625 |
| H  | -4.327747 | 1.994613  | 0.500908  |
| H  | -5.998429 | 1.386910  | 0.337131  |
| H  | -3.725923 | 0.881094  | -1.665810 |



|    |           |           |           |
|----|-----------|-----------|-----------|
| H  | -5.324326 | -0.766340 | -2.724555 |
| H  | -5.951533 | 0.906586  | -2.730929 |
| H  | -6.566910 | -0.281282 | -1.549727 |
| H  | -5.962722 | -0.814265 | 0.811643  |
| H  | -5.304260 | -2.789145 | 2.149149  |
| H  | -3.113969 | -3.859016 | 1.779429  |
| H  | -0.357502 | -2.472725 | -0.083416 |
| H  | -1.460212 | -5.128202 | 0.994262  |
| H  | -0.785831 | -3.837290 | 2.028183  |
| H  | 0.233619  | -4.624481 | 0.796720  |
| H  | -0.337776 | -4.409875 | -1.660211 |
| H  | -1.483046 | -3.168033 | -2.224127 |
| H  | -2.093023 | -4.638193 | -1.415967 |
| H  | 0.680381  | -2.127869 | -2.681060 |
| H  | 1.908961  | -0.966340 | -2.102464 |
| H  | 1.461371  | -1.002451 | -3.831068 |
| H  | 1.018504  | 1.436478  | -3.733252 |
| H  | 1.295978  | 1.558032  | -1.971586 |
| H  | -0.243182 | 2.118555  | -2.660478 |
| H  | -3.193448 | -1.132228 | -3.050726 |
| H  | -1.115358 | -0.325124 | -4.560987 |
| C  | -0.038882 | 3.319330  | 1.188835  |
| C  | 0.152459  | 4.600654  | 0.681621  |
| C  | -0.510195 | 5.030698  | -0.470051 |
| C  | -1.399601 | 4.151319  | -1.095329 |
| C  | -1.606424 | 2.870610  | -0.600526 |
| C  | -0.882827 | 2.410507  | 0.518031  |
| H  | 0.493688  | 3.013162  | 2.088634  |
| H  | 0.836942  | 5.275430  | 1.206043  |
| H  | -0.354176 | 6.039062  | -0.861672 |
| H  | -1.946662 | 4.467065  | -1.989434 |
| H  | -2.304190 | 2.200767  | -1.106274 |
| Br | -1.937704 | 1.079257  | 1.697141  |

#### 6.2aBr

|   |          |           |           |
|---|----------|-----------|-----------|
| C | 1.426467 | -0.034323 | 1.411233  |
| C | 1.573645 | 0.186056  | 2.926316  |
| C | 3.004406 | -0.162868 | 3.221541  |
| C | 3.559238 | -0.616832 | 2.106433  |
| N | 2.603846 | -0.531748 | 1.038734  |
| C | 1.234456 | 1.611930  | 3.391834  |
| C | 0.711625 | -0.871944 | 3.668934  |
| C | 3.072744 | -1.035960 | -0.231633 |
| C | 4.101814 | -0.335608 | -0.891187 |
| C | 4.623310 | -0.889870 | -2.064896 |

|    |           |           |           |
|----|-----------|-----------|-----------|
| C  | 4.166976  | -2.106028 | -2.549300 |
| C  | 3.178735  | -2.798570 | -1.858802 |
| C  | 2.612489  | -2.288880 | -0.686654 |
| C  | 4.704895  | 0.969009  | -0.383707 |
| C  | 1.570878  | -3.097020 | 0.077347  |
| C  | 0.903770  | -4.170460 | -0.784571 |
| C  | 2.189822  | -3.749811 | 1.323160  |
| C  | 4.673605  | 2.075343  | -1.447987 |
| C  | 6.145294  | 0.757373  | 0.107376  |
| H  | 4.974610  | 3.036575  | -0.997760 |
| H  | 3.669145  | 2.206648  | -1.880580 |
| H  | 5.375846  | 1.862592  | -2.272987 |
| H  | 4.112777  | 1.318394  | 0.474914  |
| H  | 6.208512  | -0.012327 | 0.893785  |
| H  | 6.548890  | 1.697596  | 0.521468  |
| H  | 6.804613  | 0.442105  | -0.720554 |
| H  | 5.413752  | -0.360448 | -2.603577 |
| H  | 4.589735  | -2.526560 | -3.465947 |
| H  | 2.842728  | -3.758063 | -2.252771 |
| H  | 0.782873  | -2.400350 | 0.412575  |
| H  | 1.616005  | -4.960055 | -1.079779 |
| H  | 0.453451  | -3.746971 | -1.698755 |
| H  | 0.105622  | -4.664889 | -0.212240 |
| H  | 1.416420  | -4.290644 | 1.895697  |
| H  | 2.648902  | -3.012378 | 2.000484  |
| H  | 2.970213  | -4.474346 | 1.029286  |
| H  | 0.941473  | -1.891818 | 3.314805  |
| H  | -0.357159 | -0.669666 | 3.514463  |
| H  | 0.938691  | -0.822013 | 4.747801  |
| H  | 0.180796  | 1.847004  | 3.183911  |
| H  | 1.864721  | 2.354394  | 2.877189  |
| H  | 1.413420  | 1.684099  | 4.479224  |
| H  | 4.542121  | -1.035570 | 1.898318  |
| H  | 3.462252  | -0.108260 | 4.209358  |
| Be | -0.146728 | 0.743461  | 0.540419  |
| C  | -0.840216 | 0.169024  | -1.135248 |
| C  | -0.227774 | 0.468970  | -2.506514 |
| C  | -1.090347 | -0.295405 | -3.471981 |
| C  | -2.130337 | -0.773669 | -2.795717 |
| N  | -1.981767 | -0.447820 | -1.409176 |
| C  | -0.459426 | 1.982919  | -2.802857 |
| C  | 1.261061  | 0.176785  | -2.635801 |
| C  | -3.153600 | -0.698314 | -0.591569 |
| C  | -4.109587 | 0.332261  | -0.495014 |
| C  | -5.319164 | 0.032369  | 0.129331  |
| C  | -5.563450 | -1.230599 | 0.660517  |

|    |           |           |           |
|----|-----------|-----------|-----------|
| C  | -4.585983 | -2.211635 | 0.587195  |
| C  | -3.361359 | -1.966455 | -0.043541 |
| C  | -3.833633 | 1.741511  | -0.996720 |
| C  | -2.292526 | -3.042898 | -0.037423 |
| C  | -1.826847 | -3.296360 | 1.403635  |
| C  | -2.774969 | -4.322646 | -0.730248 |
| C  | -4.403172 | 2.822137  | -0.072613 |
| C  | -4.325654 | 1.938218  | -2.436720 |
| H  | -3.999756 | 3.807076  | -0.365042 |
| H  | -4.115759 | 2.628811  | 0.974085  |
| H  | -5.504360 | 2.887316  | -0.133790 |
| H  | -2.742615 | 1.881931  | -0.976792 |
| H  | -3.863879 | 1.218726  | -3.133758 |
| H  | -4.083975 | 2.955593  | -2.792333 |
| H  | -5.421592 | 1.808257  | -2.493885 |
| H  | -6.081000 | 0.809160  | 0.226285  |
| H  | -6.516664 | -1.441167 | 1.153486  |
| H  | -4.771787 | -3.189805 | 1.039760  |
| H  | -1.424902 | -2.664952 | -0.601308 |
| H  | -2.656864 | -3.665920 | 2.030836  |
| H  | -1.456436 | -2.360938 | 1.855814  |
| H  | -1.025287 | -4.054151 | 1.436620  |
| H  | -1.978640 | -5.086028 | -0.751633 |
| H  | -3.078774 | -4.119883 | -1.772078 |
| H  | -3.641663 | -4.764252 | -0.208087 |
| H  | 1.479097  | -0.892603 | -2.509289 |
| H  | 1.818299  | 0.746265  | -1.878926 |
| H  | 1.618281  | 0.486718  | -3.633105 |
| H  | -0.169577 | 2.176907  | -3.849756 |
| H  | 0.153329  | 2.606942  | -2.137296 |
| H  | -1.515026 | 2.268431  | -2.680370 |
| H  | -3.017967 | -1.323026 | -3.108267 |
| H  | -0.920749 | -0.357868 | -4.547268 |
| C  | 1.586081  | 2.912704  | 0.015911  |
| C  | 1.901149  | 4.252487  | -0.230842 |
| C  | 0.907465  | 5.224582  | -0.125495 |
| C  | -0.382115 | 4.834719  | 0.243423  |
| C  | -0.667757 | 3.490508  | 0.491428  |
| C  | 0.299729  | 2.474501  | 0.369024  |
| H  | 2.385480  | 2.172224  | -0.077525 |
| H  | 2.922967  | 4.537875  | -0.505119 |
| H  | 1.135751  | 6.277694  | -0.318726 |
| H  | -1.170714 | 5.588909  | 0.343386  |
| H  | -1.683470 | 3.219235  | 0.800068  |
| Br | -1.895149 | 0.607631  | 2.000329  |

## 6.3aBr

|    |           |           |           |
|----|-----------|-----------|-----------|
| C  | 1.661139  | 0.335405  | 1.373213  |
| C  | 1.819671  | 0.969199  | 2.762429  |
| C  | 3.295525  | 1.227716  | 2.875526  |
| C  | 3.897889  | 0.658628  | 1.838353  |
| N  | 2.901944  | 0.145703  | 0.946450  |
| C  | 0.940310  | 2.197057  | 3.024028  |
| C  | 1.551011  | -0.115574 | 3.853651  |
| C  | 3.356358  | -0.551555 | -0.230043 |
| C  | 4.128404  | 0.150282  | -1.177961 |
| C  | 4.607626  | -0.568779 | -2.277138 |
| C  | 4.353876  | -1.926814 | -2.415259 |
| C  | 3.621291  | -2.601482 | -1.444490 |
| C  | 3.105444  | -1.934864 | -0.330760 |
| C  | 4.518179  | 1.621220  | -1.035447 |
| C  | 2.364886  | -2.699138 | 0.760240  |
| C  | 1.683923  | -3.977245 | 0.269663  |
| C  | 3.323758  | -3.007699 | 1.920127  |
| C  | 4.184479  | 2.478989  | -2.264165 |
| C  | 6.020408  | 1.741689  | -0.726632 |
| H  | 4.512526  | 3.517684  | -2.086688 |
| H  | 3.106466  | 2.501179  | -2.478641 |
| H  | 4.704150  | 2.119880  | -3.169054 |
| H  | 3.962002  | 2.051937  | -0.188342 |
| H  | 6.327386  | 1.121864  | 0.132113  |
| H  | 6.284561  | 2.789990  | -0.504137 |
| H  | 6.622900  | 1.417768  | -1.593517 |
| H  | 5.199238  | -0.053630 | -3.038683 |
| H  | 4.738274  | -2.468705 | -3.283653 |
| H  | 3.437282  | -3.670483 | -1.565088 |
| H  | 1.559792  | -2.056398 | 1.147150  |
| H  | 2.411348  | -4.755339 | -0.021740 |
| H  | 1.019851  | -3.776631 | -0.588068 |
| H  | 1.065722  | -4.393085 | 1.081908  |
| H  | 2.783042  | -3.501147 | 2.746245  |
| H  | 3.792617  | -2.093039 | 2.321975  |
| H  | 4.132451  | -3.681772 | 1.585143  |
| H  | 2.091577  | -1.051104 | 3.634496  |
| H  | 0.477529  | -0.334256 | 3.915733  |
| H  | 1.906976  | 0.270930  | 4.823891  |
| H  | -0.123008 | 1.926848  | 2.939289  |
| H  | 1.153489  | 3.008562  | 2.311530  |
| H  | 1.130029  | 2.565409  | 4.047130  |
| H  | 4.948637  | 0.516747  | 1.596473  |
| H  | 3.775134  | 1.689901  | 3.738543  |
| Be | -0.040555 | 0.093799  | 0.600657  |

|   |           |           |           |
|---|-----------|-----------|-----------|
| C | -0.731841 | 0.026451  | -0.984987 |
| C | -0.061849 | -0.014726 | -2.397236 |
| C | -1.199777 | 0.242886  | -3.353692 |
| C | -2.334374 | 0.149151  | -2.669406 |
| N | -2.099820 | -0.066933 | -1.296089 |
| C | 1.116310  | 0.893730  | -2.704138 |
| C | 0.406124  | -1.474599 | -2.600013 |
| C | -3.232768 | -0.510424 | -0.521558 |
| C | -4.338620 | 0.353299  | -0.349844 |
| C | -5.447344 | -0.114174 | 0.366395  |
| C | -5.486675 | -1.399169 | 0.882846  |
| C | -4.420528 | -2.259481 | 0.650058  |
| C | -3.295624 | -1.847124 | -0.063821 |
| C | -4.439295 | 1.753139  | -0.951356 |
| C | -2.220958 | -2.864062 | -0.415042 |
| C | -2.055317 | -3.983330 | 0.614969  |
| C | -2.521837 | -3.454993 | -1.801314 |
| C | -4.891491 | 2.805594  | 0.073732  |
| C | -5.412419 | 1.775755  | -2.142183 |
| H | -4.721564 | 3.821131  | -0.324242 |
| H | -4.352870 | 2.712110  | 1.030155  |
| H | -5.969604 | 2.715912  | 0.294013  |
| H | -3.445653 | 2.049750  | -1.319855 |
| H | -5.141604 | 1.049749  | -2.925733 |
| H | -5.434329 | 2.779175  | -2.603335 |
| H | -6.437912 | 1.531482  | -1.812651 |
| H | -6.304051 | 0.548117  | 0.518530  |
| H | -6.357428 | -1.740459 | 1.450084  |
| H | -4.471860 | -3.280140 | 1.033936  |
| H | -1.260065 | -2.331146 | -0.457370 |
| H | -2.932487 | -4.653470 | 0.651112  |
| H | -1.883012 | -3.567447 | 1.621662  |
| H | -1.189049 | -4.610339 | 0.343572  |
| H | -1.725064 | -4.154503 | -2.113425 |
| H | -2.609429 | -2.669531 | -2.571260 |
| H | -3.475733 | -4.012736 | -1.781092 |
| H | -0.418328 | -2.186702 | -2.463273 |
| H | 1.205982  | -1.719404 | -1.886964 |
| H | 0.801888  | -1.605761 | -3.622827 |
| H | 1.528569  | 0.627793  | -3.693726 |
| H | 1.918995  | 0.751520  | -1.971321 |
| H | 0.819932  | 1.952301  | -2.732853 |
| H | -3.361299 | 0.171490  | -3.028486 |
| H | -1.086767 | 0.399866  | -4.426350 |
| C | -1.566986 | 2.473885  | 0.450665  |
| C | -1.647910 | 3.845686  | 0.692414  |

|    |           |           |           |
|----|-----------|-----------|-----------|
| C  | -0.568729 | 4.674141  | 0.383971  |
| C  | 0.599740  | 4.110932  | -0.126953 |
| C  | 0.670192  | 2.733252  | -0.339762 |
| C  | -0.420010 | 1.884748  | -0.088944 |
| H  | -2.399895 | 1.827664  | 0.734921  |
| H  | -2.554769 | 4.271787  | 1.131005  |
| H  | -0.632297 | 5.752052  | 0.561461  |
| H  | 1.468382  | 4.741627  | -0.343202 |
| H  | 1.622860  | 2.319754  | -0.673416 |
| Br | -1.350494 | -0.596198 | 2.218314  |

#### 6.4aBr

|   |          |           |           |
|---|----------|-----------|-----------|
| C | 1.596453 | -0.374759 | 1.466940  |
| C | 1.762008 | -0.582946 | 2.978757  |
| C | 3.240295 | -0.745229 | 3.170899  |
| C | 3.830864 | -0.625673 | 1.989205  |
| N | 2.829684 | -0.399049 | 0.991873  |
| C | 1.324641 | 0.686820  | 3.752163  |
| C | 1.046686 | -1.855867 | 3.478127  |
| C | 3.347914 | -0.201034 | -0.341723 |
| C | 3.859317 | 1.067896  | -0.661030 |
| C | 4.490538 | 1.206231  | -1.901409 |
| C | 4.624899 | 0.123723  | -2.760928 |
| C | 4.133612 | -1.127862 | -2.400308 |
| C | 3.487501 | -1.323787 | -1.178850 |
| C | 3.818370 | 2.244285  | 0.308597  |
| C | 2.950564 | -2.694512 | -0.778646 |
| C | 2.553686 | -3.567501 | -1.973259 |
| C | 3.945303 | -3.459969 | 0.107962  |
| C | 3.341725 | 3.553435  | -0.331650 |
| C | 5.198157 | 2.446612  | 0.955444  |
| H | 3.275410 | 4.338827  | 0.440518  |
| H | 2.347077 | 3.451855  | -0.790643 |
| H | 4.046942 | 3.911086  | -1.101950 |
| H | 3.106699 | 2.000992  | 1.113977  |
| H | 5.556888 | 1.537307  | 1.464438  |
| H | 5.156443 | 3.257977  | 1.702566  |
| H | 5.947972 | 2.724011  | 0.193594  |
| H | 4.889852 | 2.179611  | -2.196949 |
| H | 5.121235 | 0.254205  | -3.726406 |
| H | 4.244637 | -1.963404 | -3.094027 |
| H | 2.034921 | -2.523991 | -0.187386 |
| H | 3.438412 | -3.930981 | -2.524979 |
| H | 1.898526 | -3.030586 | -2.677065 |
| H | 2.008546 | -4.456960 | -1.614235 |

|    |           |           |           |
|----|-----------|-----------|-----------|
| H  | 3.532792  | -4.449655 | 0.370314  |
| H  | 4.164441  | -2.933739 | 1.050124  |
| H  | 4.898599  | -3.617895 | -0.426690 |
| H  | 1.394099  | -2.742077 | 2.919283  |
| H  | -0.041995 | -1.760864 | 3.365296  |
| H  | 1.284499  | -2.006597 | 4.545107  |
| H  | 0.246709  | 0.864038  | 3.636762  |
| H  | 1.876908  | 1.572398  | 3.391548  |
| H  | 1.557109  | 0.548953  | 4.821824  |
| H  | 4.873198  | -0.674915 | 1.679133  |
| H  | 3.720308  | -0.921039 | 4.133720  |
| Be | -0.119744 | -0.043924 | 0.653396  |
| C  | -0.823876 | 0.590096  | -0.907035 |
| C  | -0.117736 | 0.630785  | -2.334015 |
| C  | -1.310988 | 0.713230  | -3.276477 |
| C  | -2.383487 | 0.230893  | -2.637380 |
| N  | -2.159103 | 0.000349  | -1.287556 |
| C  | 0.873350  | 1.778277  | -2.529438 |
| C  | 0.605694  | -0.683352 | -2.653473 |
| C  | -3.048000 | -0.857322 | -0.567813 |
| C  | -4.349039 | -0.406406 | -0.244747 |
| C  | -5.219906 | -1.260358 | 0.439276  |
| C  | -4.842208 | -2.545384 | 0.799307  |
| C  | -3.574087 | -2.996782 | 0.456674  |
| C  | -2.673105 | -2.179197 | -0.226384 |
| C  | -4.831160 | 0.999067  | -0.562353 |
| C  | -1.327521 | -2.760491 | -0.625861 |
| C  | -0.694296 | -3.650145 | 0.449290  |
| C  | -1.461968 | -3.514710 | -1.955045 |
| C  | -4.815523 | 1.873271  | 0.697044  |
| C  | -6.200210 | 1.023460  | -1.252031 |
| H  | -5.087947 | 2.916132  | 0.452105  |
| H  | -3.813629 | 1.877669  | 1.156688  |
| H  | -5.534717 | 1.496414  | 1.447215  |
| H  | -4.119934 | 1.437203  | -1.268364 |
| H  | -6.210045 | 0.376794  | -2.147232 |
| H  | -6.445977 | 2.052419  | -1.569962 |
| H  | -7.012098 | 0.686034  | -0.583693 |
| H  | -6.217564 | -0.902323 | 0.709650  |
| H  | -5.534005 | -3.195862 | 1.342329  |
| H  | -3.283313 | -4.015724 | 0.725497  |
| H  | -0.636884 | -1.921586 | -0.795100 |
| H  | -1.233656 | -4.604897 | 0.574858  |
| H  | -0.678666 | -3.138653 | 1.426269  |
| H  | 0.343524  | -3.906318 | 0.169569  |
| H  | -0.482944 | -3.891434 | -2.302208 |

|    |           |           |           |
|----|-----------|-----------|-----------|
| H  | -1.879933 | -2.861349 | -2.739418 |
| H  | -2.142458 | -4.377516 | -1.838404 |
| H  | -0.105748 | -1.511737 | -2.763955 |
| H  | 1.314334  | -0.928122 | -1.853151 |
| H  | 1.171939  | -0.604911 | -3.599688 |
| H  | 1.299502  | 1.727651  | -3.547662 |
| H  | 1.711077  | 1.695078  | -1.821238 |
| H  | 0.406975  | 2.767984  | -2.405506 |
| H  | -3.370005 | 0.002173  | -3.050788 |
| H  | -1.246573 | 0.965302  | -4.335921 |
| C  | -1.997039 | 2.923993  | -0.873660 |
| C  | -2.064613 | 4.243504  | -0.431581 |
| C  | -1.122446 | 4.743558  | 0.467861  |
| C  | -0.097586 | 3.906567  | 0.900179  |
| C  | -0.040133 | 2.591438  | 0.442216  |
| C  | -0.992298 | 2.051700  | -0.434552 |
| H  | -2.722869 | 2.574268  | -1.605390 |
| H  | -2.865223 | 4.892615  | -0.799543 |
| H  | -1.185090 | 5.776399  | 0.822537  |
| H  | 0.661643  | 4.272860  | 1.598029  |
| H  | 0.802704  | 1.972047  | 0.776775  |
| Br | -1.627539 | -0.102397 | 2.190636  |

#### 6.1al

|   |          |           |           |
|---|----------|-----------|-----------|
| C | 1.477405 | 0.014255  | 1.369273  |
| C | 1.381198 | -0.119213 | 2.913287  |
| C | 2.795256 | -0.439056 | 3.339274  |
| C | 3.578905 | -0.399619 | 2.265465  |
| N | 2.818955 | -0.130351 | 1.111142  |
| C | 1.010366 | 1.204806  | 3.618835  |
| C | 0.435158 | -1.261973 | 3.319667  |
| C | 3.497236 | -0.157097 | -0.141382 |
| C | 3.714859 | 1.044449  | -0.848631 |
| C | 4.440741 | 0.965151  | -2.039472 |
| C | 4.962507 | -0.245429 | -2.491781 |
| C | 4.761385 | -1.408874 | -1.761989 |
| C | 4.016786 | -1.391638 | -0.577618 |
| C | 3.210454 | 2.379481  | -0.308394 |
| C | 3.779124 | -2.693327 | 0.180201  |
| C | 2.917313 | -3.673947 | -0.623752 |
| C | 5.101690 | -3.336830 | 0.615547  |
| C | 3.232024 | 3.511081  | -1.337265 |
| C | 3.994034 | 2.813425  | 0.940570  |
| H | 2.740908 | 4.401601  | -0.913326 |
| H | 2.690937 | 3.250225  | -2.261703 |



|    |           |           |           |
|----|-----------|-----------|-----------|
| H  | 4.265032  | 3.796823  | -1.606004 |
| H  | 2.160460  | 2.231629  | -0.001381 |
| H  | 3.933880  | 2.072867  | 1.753004  |
| H  | 3.586458  | 3.764408  | 1.327082  |
| H  | 5.059985  | 2.973111  | 0.697373  |
| H  | 4.620412  | 1.868076  | -2.625674 |
| H  | 5.533965  | -0.275856 | -3.423907 |
| H  | 5.173488  | -2.353465 | -2.129237 |
| H  | 3.212469  | -2.464141 | 1.094009  |
| H  | 3.366389  | -3.910631 | -1.604830 |
| H  | 1.915498  | -3.253018 | -0.798730 |
| H  | 2.797426  | -4.621029 | -0.068397 |
| H  | 4.908119  | -4.231915 | 1.232068  |
| H  | 5.712980  | -2.638116 | 1.212246  |
| H  | 5.706365  | -3.653777 | -0.252683 |
| H  | 0.805614  | -2.215942 | 2.909938  |
| H  | -0.587212 | -1.097667 | 2.943250  |
| H  | 0.390255  | -1.352044 | 4.420369  |
| H  | -0.016144 | 1.523916  | 3.396631  |
| H  | 1.710071  | 2.005118  | 3.322959  |
| H  | 1.094955  | 1.070217  | 4.712116  |
| H  | 4.656698  | -0.529429 | 2.162542  |
| H  | 3.102933  | -0.599656 | 4.372730  |
| Be | 0.191445  | 0.143104  | 0.261480  |
| C  | -0.484157 | -0.380724 | -1.202090 |
| C  | 0.190720  | -0.247837 | -2.581167 |
| C  | -0.895269 | -0.631154 | -3.552692 |
| C  | -1.954726 | -1.039364 | -2.858576 |
| N  | -1.724332 | -0.901737 | -1.468846 |
| C  | 0.731273  | 1.165063  | -2.828252 |
| C  | 1.327902  | -1.276539 | -2.739986 |
| C  | -2.693684 | -1.442677 | -0.560158 |
| C  | -4.003366 | -0.915400 | -0.555374 |
| C  | -4.929148 | -1.456733 | 0.342210  |
| C  | -4.578680 | -2.482925 | 1.207428  |
| C  | -3.298052 | -3.025240 | 1.151345  |
| C  | -2.341372 | -2.545809 | 0.253737  |
| C  | -4.473969 | 0.179673  | -1.507956 |
| C  | -1.008474 | -3.266197 | 0.091872  |
| C  | -0.650873 | -4.195476 | 1.253224  |
| C  | -0.993070 | -4.058301 | -1.225673 |
| C  | -5.130996 | 1.371502  | -0.799966 |
| C  | -5.439304 | -0.400393 | -2.554509 |
| H  | -5.389576 | 2.149028  | -1.540005 |
| H  | -4.458871 | 1.818976  | -0.051557 |
| H  | -6.064560 | 1.079202  | -0.288164 |

|   |           |           |           |
|---|-----------|-----------|-----------|
| H | -3.596921 | 0.572037  | -2.044166 |
| H | -5.009376 | -1.266332 | -3.085890 |
| H | -5.705354 | 0.365322  | -3.304159 |
| H | -6.373430 | -0.743823 | -2.075741 |
| H | -5.945661 | -1.054161 | 0.371283  |
| H | -5.310992 | -2.878697 | 1.916851  |
| H | -3.050609 | -3.859788 | 1.809982  |
| H | -0.215781 | -2.500769 | 0.038833  |
| H | -1.287217 | -5.098624 | 1.271928  |
| H | -0.742203 | -3.691275 | 2.228628  |
| H | 0.394099  | -4.533923 | 1.144206  |
| H | -0.018644 | -4.559808 | -1.362914 |
| H | -1.163945 | -3.412698 | -2.102295 |
| H | -1.778191 | -4.835688 | -1.217090 |
| H | 0.953236  | -2.301021 | -2.585581 |
| H | 2.127477  | -1.081382 | -2.015736 |
| H | 1.756416  | -1.213392 | -3.756311 |
| H | 1.263182  | 1.209664  | -3.795576 |
| H | 1.437916  | 1.439144  | -2.032456 |
| H | -0.074630 | 1.912763  | -2.834773 |
| H | -2.895660 | -1.470410 | -3.196222 |
| H | -0.774386 | -0.657384 | -4.636007 |
| C | -0.032145 | 3.367016  | 0.862119  |
| C | 0.197545  | 4.580208  | 0.218022  |
| C | -0.435832 | 4.886520  | -0.987834 |
| C | -1.327530 | 3.958351  | -1.531923 |
| C | -1.566918 | 2.744159  | -0.898720 |
| C | -0.886255 | 2.409711  | 0.285672  |
| H | 0.473162  | 3.158569  | 1.805866  |
| H | 0.884625  | 5.299452  | 0.675780  |
| H | -0.254259 | 5.842762  | -1.485428 |
| H | -1.847677 | 4.179891  | -2.469329 |
| H | -2.265442 | 2.031917  | -1.344696 |
| I | -2.147494 | 1.139111  | 1.722128  |

#### 6.2al

|   |           |           |           |
|---|-----------|-----------|-----------|
| C | -1.530482 | 0.029250  | -1.381623 |
| C | -1.675478 | 0.330223  | -2.885171 |
| C | -3.109429 | 0.014608  | -3.199054 |
| C | -3.668876 | -0.496033 | -2.111918 |
| N | -2.714079 | -0.478159 | -1.040433 |
| C | -1.325482 | 1.774312  | -3.280612 |
| C | -0.839346 | -0.704654 | -3.688349 |
| C | -3.205724 | -1.037402 | 0.198258  |
| C | -4.232624 | -0.352060 | 0.876677  |

|    |           |           |           |
|----|-----------|-----------|-----------|
| C  | -4.777383 | -0.951739 | 2.016612  |
| C  | -4.345035 | -2.195840 | 2.449601  |
| C  | -3.360164 | -2.872333 | 1.738413  |
| C  | -2.773010 | -2.318790 | 0.596370  |
| C  | -4.808796 | 0.984549  | 0.423779  |
| C  | -1.740940 | -3.109230 | -0.198404 |
| C  | -1.118170 | -4.250272 | 0.607376  |
| C  | -2.352780 | -3.672518 | -1.490774 |
| C  | -4.741403 | 2.050879  | 1.525833  |
| C  | -6.256275 | 0.822296  | -0.064944 |
| H  | -5.062067 | 3.026507  | 1.122352  |
| H  | -3.721328 | 2.171515  | 1.922906  |
| H  | -5.411182 | 1.805026  | 2.368423  |
| H  | -4.216249 | 1.351890  | -0.426656 |
| H  | -6.341437 | 0.072961  | -0.869202 |
| H  | -6.637455 | 1.782077  | -0.454669 |
| H  | -6.921127 | 0.504205  | 0.757388  |
| H  | -5.566060 | -0.435116 | 2.570182  |
| H  | -4.784420 | -2.650765 | 3.341614  |
| H  | -3.046239 | -3.855406 | 2.089995  |
| H  | -0.929640 | -2.415271 | -0.480224 |
| H  | -1.858008 | -5.034362 | 0.843697  |
| H  | -0.670497 | -3.896327 | 1.551741  |
| H  | -0.325824 | -4.732005 | 0.016805  |
| H  | -1.581859 | -4.200203 | -2.078653 |
| H  | -2.778994 | -2.886134 | -2.133217 |
| H  | -3.157117 | -4.391603 | -1.253606 |
| H  | -1.090764 | -1.736976 | -3.389506 |
| H  | 0.235909  | -0.539470 | -3.536325 |
| H  | -1.069851 | -0.589900 | -4.761362 |
| H  | -0.274596 | 2.003431  | -3.054078 |
| H  | -1.960987 | 2.493889  | -2.740622 |
| H  | -1.491756 | 1.896064  | -4.365403 |
| H  | -4.655999 | -0.915273 | -1.926046 |
| H  | -3.564128 | 0.128275  | -4.183246 |
| Be | 0.050870  | 0.750710  | -0.433689 |
| C  | 0.686989  | 0.090306  | 1.243397  |
| C  | 0.010053  | 0.366461  | 2.592806  |
| C  | 0.783538  | -0.469466 | 3.572653  |
| C  | 1.839330  | -0.967148 | 2.937115  |
| N  | 1.787442  | -0.580422 | 1.559331  |
| C  | 0.278132  | 1.857228  | 2.967446  |
| C  | -1.492945 | 0.132363  | 2.632946  |
| C  | 3.003618  | -0.835103 | 0.809874  |
| C  | 4.003633  | 0.158375  | 0.846923  |
| C  | 5.238459  | -0.150268 | 0.278977  |

|   |           |           |           |
|---|-----------|-----------|-----------|
| C | 5.469276  | -1.385377 | -0.318514 |
| C | 4.457127  | -2.332140 | -0.362899 |
| C | 3.203730  | -2.078473 | 0.204486  |
| C | 3.758506  | 1.538779  | 1.438387  |
| C | 2.113546  | -3.128209 | 0.095674  |
| C | 1.777301  | -3.391458 | -1.378855 |
| C | 2.506716  | -4.409056 | 0.842321  |
| C | 4.443374  | 2.660052  | 0.650871  |
| C | 4.156749  | 1.598652  | 2.919771  |
| H | 4.067156  | 3.637239  | 1.000307  |
| H | 4.225381  | 2.571232  | -0.426192 |
| H | 5.538819  | 2.660812  | 0.793640  |
| H | 2.679216  | 1.736649  | 1.359357  |
| H | 3.611923  | 0.856697  | 3.526657  |
| H | 3.941676  | 2.598381  | 3.337141  |
| H | 5.238392  | 1.406205  | 3.037861  |
| H | 6.031488  | 0.600550  | 0.278613  |
| H | 6.442170  | -1.601196 | -0.768711 |
| H | 4.639175  | -3.290207 | -0.857765 |
| H | 1.206056  | -2.726057 | 0.573408  |
| H | 2.647602  | -3.800380 | -1.920852 |
| H | 1.481044  | -2.454537 | -1.880005 |
| H | 0.956905  | -4.123154 | -1.475590 |
| H | 1.703644  | -5.163660 | 0.790320  |
| H | 2.709774  | -4.202059 | 1.907596  |
| H | 3.416204  | -4.861553 | 0.409794  |
| H | -1.744161 | -0.925351 | 2.476924  |
| H | -1.980297 | 0.737712  | 1.856709  |
| H | -1.894269 | 0.441728  | 3.613451  |
| H | -0.051847 | 2.012400  | 4.008860  |
| H | -0.286303 | 2.531004  | 2.307949  |
| H | 1.346042  | 2.114001  | 2.904064  |
| H | 2.682948  | -1.567948 | 3.275611  |
| H | 0.549532  | -0.565739 | 4.633195  |
| C | -1.657576 | 2.930509  | 0.056092  |
| C | -1.966935 | 4.256246  | 0.376030  |
| C | -0.947395 | 5.203171  | 0.453916  |
| C | 0.365170  | 4.803428  | 0.192295  |
| C | 0.645836  | 3.474653  | -0.130726 |
| C | -0.350942 | 2.480595  | -0.196115 |
| H | -2.482174 | 2.212966  | 0.005903  |
| H | -3.005628 | 4.549693  | 0.564308  |
| H | -1.172170 | 6.244895  | 0.704299  |
| H | 1.176766  | 5.537967  | 0.235997  |
| H | 1.685388  | 3.202180  | -0.345517 |
| I | 2.056997  | 0.686482  | -2.035826 |

## 6.3a1

|   |           |           |           |
|---|-----------|-----------|-----------|
| C | -1.759885 | 0.458150  | -1.279471 |
| C | -1.951490 | 1.112015  | -2.657712 |
| C | -3.429253 | 1.373700  | -2.728852 |
| C | -4.007932 | 0.762294  | -1.702327 |
| N | -2.993532 | 0.235179  | -0.841255 |
| C | -1.063053 | 2.318583  | -2.968835 |
| C | -1.743676 | 0.029540  | -3.769179 |
| C | -3.419250 | -0.535920 | 0.301435  |
| C | -4.216028 | 0.081549  | 1.289389  |
| C | -4.647258 | -0.712671 | 2.355739  |
| C | -4.340610 | -2.065989 | 2.419022  |
| C | -3.599242 | -2.659295 | 1.404390  |
| C | -3.118092 | -1.912474 | 0.325812  |
| C | -4.712610 | 1.525477  | 1.203170  |
| C | -2.363862 | -2.600545 | -0.803041 |
| C | -1.518630 | -3.786992 | -0.340135 |
| C | -3.343846 | -3.007608 | -1.912069 |
| C | -4.489847 | 2.361405  | 2.471230  |
| C | -6.214282 | 1.532347  | 0.862654  |
| H | -4.971341 | 1.907717  | 3.354314  |
| H | -4.938206 | 3.360224  | 2.331917  |
| H | -3.424440 | 2.502862  | 2.698648  |
| H | -4.172502 | 2.035289  | 0.389307  |
| H | -6.458510 | 0.901524  | -0.008037 |
| H | -6.558433 | 2.559349  | 0.650481  |
| H | -6.802886 | 1.147241  | 1.713778  |
| H | -5.253523 | -0.265075 | 3.147808  |
| H | -4.693535 | -2.667371 | 3.261275  |
| H | -3.379877 | -3.727289 | 1.459688  |
| H | -1.650847 | -1.885377 | -1.235471 |
| H | -2.132496 | -4.661562 | -0.059410 |
| H | -0.889774 | -3.508091 | 0.521668  |
| H | -0.844619 | -4.098130 | -1.155061 |
| H | -2.797984 | -3.448083 | -2.764253 |
| H | -3.917352 | -2.141043 | -2.285969 |
| H | -4.068387 | -3.754947 | -1.541023 |
| H | -2.251834 | -0.915802 | -3.519227 |
| H | -0.674524 | -0.173781 | -3.908456 |
| H | -2.168055 | 0.414037  | -4.712107 |
| H | 0.000139  | 2.044073  | -2.887664 |
| H | -1.258156 | 3.158020  | -2.286255 |
| H | -1.258511 | 2.651283  | -4.002901 |
| H | -5.053252 | 0.597982  | -1.454297 |

|    |           |           |           |
|----|-----------|-----------|-----------|
| H  | -3.928667 | 1.853865  | -3.570582 |
| Be | -0.056373 | 0.187934  | -0.511751 |
| C  | 0.632648  | 0.211412  | 1.076202  |
| C  | -0.101965 | 0.292521  | 2.454773  |
| C  | 0.996163  | 0.607624  | 3.439561  |
| C  | 2.157876  | 0.431224  | 2.819885  |
| N  | 1.982919  | 0.101607  | 1.460322  |
| C  | -1.275576 | 1.239776  | 2.626829  |
| C  | -0.613145 | -1.137276 | 2.748539  |
| C  | 3.140454  | -0.435889 | 0.785868  |
| C  | 4.265729  | 0.391364  | 0.563838  |
| C  | 5.388881  | -0.159929 | -0.064846 |
| C  | 5.428113  | -1.493307 | -0.438823 |
| C  | 4.349752  | -2.315654 | -0.138212 |
| C  | 3.208662  | -1.818338 | 0.491496  |
| C  | 4.376443  | 1.836760  | 1.041179  |
| C  | 2.127444  | -2.786347 | 0.945570  |
| C  | 2.040489  | -4.070010 | 0.117258  |
| C  | 2.359542  | -3.136426 | 2.424630  |
| C  | 4.913800  | 2.780253  | -0.046210 |
| C  | 5.290887  | 1.938559  | 2.274167  |
| H  | 4.745242  | 3.831878  | 0.243295  |
| H  | 4.430479  | 2.606903  | -1.020688 |
| H  | 6.000446  | 2.649998  | -0.191515 |
| H  | 3.374789  | 2.188758  | 1.330395  |
| H  | 4.961787  | 1.291438  | 3.103086  |
| H  | 5.320066  | 2.977835  | 2.647299  |
| H  | 6.323318  | 1.640264  | 2.019197  |
| H  | 6.258833  | 0.473420  | -0.258457 |
| H  | 6.310147  | -1.901460 | -0.940419 |
| H  | 4.404408  | -3.373709 | -0.399538 |
| H  | 1.159372  | -2.272917 | 0.845928  |
| H  | 2.928814  | -4.712066 | 0.251350  |
| H  | 1.923398  | -3.846011 | -0.956118 |
| H  | 1.168976  | -4.663872 | 0.441677  |
| H  | 1.563385  | -3.804321 | 2.800509  |
| H  | 2.382055  | -2.237847 | 3.063624  |
| H  | 3.325975  | -3.658824 | 2.543928  |
| H  | 0.196575  | -1.876242 | 2.701248  |
| H  | -1.388961 | -1.421770 | 2.023960  |
| H  | -1.050541 | -1.180313 | 3.761622  |
| H  | -1.780448 | 1.014142  | 3.582666  |
| H  | -2.012808 | 1.095652  | 1.827466  |
| H  | -0.956574 | 2.291620  | 2.651590  |
| H  | 3.167334  | 0.463418  | 3.224905  |
| H  | 0.839645  | 0.856228  | 4.489220  |

|   |           |           |           |
|---|-----------|-----------|-----------|
| C | 1.622721  | 2.464429  | -0.541527 |
| C | 1.802133  | 3.803330  | -0.890939 |
| C | 0.800658  | 4.736210  | -0.624888 |
| C | -0.396240 | 4.304891  | -0.056782 |
| C | -0.575985 | 2.954161  | 0.245589  |
| C | 0.440408  | 2.003581  | 0.048768  |
| H | 2.409343  | 1.742951  | -0.773309 |
| H | 2.728552  | 4.122481  | -1.375788 |
| H | 0.945786  | 5.790753  | -0.878214 |
| H | -1.207085 | 5.017345  | 0.126603  |
| H | -1.560021 | 2.647853  | 0.602413  |
| I | 1.307336  | -0.872616 | -2.236819 |

6.4al

|   |           |           |           |
|---|-----------|-----------|-----------|
| C | -1.660757 | 0.071934  | -1.436852 |
| C | -1.819703 | 0.340061  | -2.940559 |
| C | -3.289575 | 0.190364  | -3.193406 |
| C | -3.883201 | -0.095894 | -2.043488 |
| N | -2.893826 | -0.152115 | -1.009430 |
| C | -1.433096 | 1.802222  | -3.274030 |
| C | -1.068706 | -0.698193 | -3.801572 |
| C | -3.437321 | -0.415897 | 0.304661  |
| C | -4.090543 | 0.640870  | 0.964614  |
| C | -4.755507 | 0.337618  | 2.157089  |
| C | -4.790072 | -0.960200 | 2.647856  |
| C | -4.165711 | -1.990677 | 1.952175  |
| C | -3.481925 | -1.747934 | 0.759340  |
| C | -4.161627 | 2.060785  | 0.410387  |
| C | -2.815479 | -2.882433 | -0.012214 |
| C | -2.464785 | -4.092036 | 0.858241  |
| C | -3.670779 | -3.348819 | -1.201166 |
| C | -3.822589 | 3.132405  | 1.455184  |
| C | -5.551922 | 2.337936  | -0.184153 |
| H | -3.795501 | 4.124826  | 0.973858  |
| H | -2.843475 | 2.959736  | 1.927233  |
| H | -4.585731 | 3.177467  | 2.251130  |
| H | -3.427365 | 2.153213  | -0.406516 |
| H | -5.820706 | 1.617690  | -0.973014 |
| H | -5.584918 | 3.349116  | -0.625277 |
| H | -6.327948 | 2.283755  | 0.599584  |
| H | -5.261785 | 1.133457  | 2.708798  |
| H | -5.314297 | -1.175466 | 3.582887  |
| H | -4.206384 | -3.003296 | 2.356708  |
| H | -1.868469 | -2.483984 | -0.413703 |
| H | -3.368931 | -4.644128 | 1.169746  |

|    |           |           |           |
|----|-----------|-----------|-----------|
| H  | -1.900531 | -3.806377 | 1.760204  |
| H  | -1.841832 | -4.793193 | 0.278074  |
| H  | -3.163543 | -4.176900 | -1.726262 |
| H  | -3.848357 | -2.551848 | -1.939476 |
| H  | -4.650914 | -3.718035 | -0.850506 |
| H  | -1.395666 | -1.721696 | -3.547966 |
| H  | 0.018134  | -0.621785 | -3.659174 |
| H  | -1.299241 | -0.515519 | -4.865134 |
| H  | -0.364747 | 1.984419  | -3.094442 |
| H  | -2.023232 | 2.506173  | -2.661880 |
| H  | -1.656325 | 1.995214  | -4.337232 |
| H  | -4.920443 | -0.296579 | -1.782172 |
| H  | -3.760371 | 0.303750  | -4.169961 |
| Be | 0.033418  | 0.200793  | -0.531272 |
| C  | 0.649581  | 0.266752  | 1.189757  |
| C  | -0.077343 | -0.066347 | 2.567618  |
| C  | 1.099112  | -0.079488 | 3.532199  |
| C  | 2.216666  | -0.314489 | 2.839967  |
| N  | 2.022215  | -0.280998 | 1.462454  |
| C  | -1.156334 | 0.908664  | 3.041224  |
| C  | -0.673864 | -1.479549 | 2.573556  |
| C  | 2.972018  | -0.937396 | 0.620047  |
| C  | 4.305636  | -0.456322 | 0.567008  |
| C  | 5.235961  | -1.100008 | -0.254667 |
| C  | 4.895160  | -2.207498 | -1.014887 |
| C  | 3.603535  | -2.706059 | -0.924795 |
| C  | 2.640365  | -2.104680 | -0.112875 |
| C  | 4.809354  | 0.754865  | 1.342298  |
| C  | 1.292775  | -2.798202 | 0.010398  |
| C  | 0.727331  | -3.285488 | -1.329056 |
| C  | 1.413472  | -3.956355 | 1.010572  |
| C  | 5.177304  | 1.907206  | 0.398553  |
| C  | 5.975149  | 0.397996  | 2.274411  |
| H  | 5.439384  | 2.813094  | 0.975435  |
| H  | 4.337174  | 2.150156  | -0.273894 |
| H  | 6.046022  | 1.646617  | -0.231921 |
| H  | 4.005191  | 1.111959  | 1.994677  |
| H  | 5.698912  | -0.418342 | 2.964799  |
| H  | 6.265188  | 1.275306  | 2.880070  |
| H  | 6.868512  | 0.071363  | 1.713754  |
| H  | 6.256551  | -0.709644 | -0.311505 |
| H  | 5.633672  | -2.688019 | -1.662829 |
| H  | 3.341969  | -3.600561 | -1.495885 |
| H  | 0.574446  | -2.076519 | 0.421897  |
| H  | 1.337543  | -4.090644 | -1.772696 |
| H  | 0.674762  | -2.462275 | -2.061950 |



|   |           |           |           |
|---|-----------|-----------|-----------|
| H | -0.286525 | -3.700343 | -1.190752 |
| H | 0.434218  | -4.432902 | 1.192835  |
| H | 1.811763  | -3.602601 | 1.976717  |
| H | 2.106304  | -4.727143 | 0.627058  |
| H | 0.107723  | -2.242783 | 2.460517  |
| H | -1.395670 | -1.585333 | 1.754884  |
| H | -1.200217 | -1.681198 | 3.524471  |
| H | -1.491467 | 0.601467  | 4.048273  |
| H | -2.042966 | 0.890661  | 2.391079  |
| H | -0.787146 | 1.943447  | 3.114243  |
| H | 3.208361  | -0.552127 | 3.231761  |
| H | 1.002070  | -0.060733 | 4.618713  |
| C | 1.803620  | 2.605456  | 1.141453  |
| C | 1.781811  | 3.953256  | 0.802081  |
| C | 0.623781  | 4.542462  | 0.288391  |
| C | -0.520145 | 3.764139  | 0.153080  |
| C | -0.489072 | 2.414602  | 0.507083  |
| C | 0.676854  | 1.790510  | 0.987385  |
| H | 2.715990  | 2.161479  | 1.524820  |
| H | 2.688392  | 4.552023  | 0.931900  |
| H | 0.615495  | 5.599265  | 0.007083  |
| H | -1.448128 | 4.203414  | -0.226181 |
| H | -1.412184 | 1.833872  | 0.434400  |
| I | 1.818081  | 0.697147  | -2.093600 |
